# Supplementary material
Source: publisher figshare collection journal article supplement (https://gsajournals.figshare.com/ndownloader/files/17872352)
Supplement: Supplementary file 1 [file 17872352]

YALI1_ID	YALI0_ID	IBT_Glu_1	IBT_Glu_2	IBT_Glu_3	IBT_Gly_1	IBT_Gly_2	IBT_Gly_3	IBT_GlyGlu_2	IBT_GlyGlu_3	W29_Glu_1	W29_Glu_2	W29_Gly_1	W29_Gly_2	W29_Gly_3	W29_GlyGlu_1	W29_GlyGlu_2	W29_GlyGlu_3
YALI1_A00014g	NA	7.471420153	6.830754337	8.488048968	6.387228124	7.850605316	7.558256839	9.687579523	8.798383319	14.37657085	13.6807354	16.91247934	13.39647459	16.54863214	14.46541728	13.22061659	15.00835059
YALI1_A00019g	NA	13.39552251	12.34998994	12.90497673	10.13888803	13.58926499	12.57123276	11.58127193	12.15007909	16.0179849	19.22612322	20.62052104	15.00332498	19.60559975	20.26956317	19.28069135	19.1218976
YALI1_A00032g	NA	0.204104081	0.413825702	0.275212432	0.107731978	0.165937084	0.137932927	0.090624257	0.455050799	1.402421762	1.280356018	1.461731338	0.927236681	0.631613561	1.307332134	1.547378639	1.934781713
YALI1_A00058g	YALI0A00110g	1.102460839	1.352273347	0.832249007	1.131671049	1.13564749	1.23487249	0.735607712	1.195020791	700.4472413	745.9327448	672.5665559	488.7974802	621.3579015	569.7261088	556.8214927	626.6343739
YALI1_A00102g	YALI0A00132g	1393.868791	1707.610683	1701.380644	1407.893595	1442.440097	1318.364721	1660.046856	1185.872862	723.3654785	843.78897	1030.931407	1014.669645	742.7699791	866.5064929	981.5241836	840.0597552
YALI1_A00135g	NA	1.786821888	0.832269995	0.694583757	1.42744871	0.732888787	1.305436632	1.458079571	1.107445056	1.249216023	1.147988384	1.217413386	1.828256848	1.29518376	2.04252118	0.911234088	1.981931856
YALI1_A00148g	YALI0A00154g	2.415418022	4.431619765	3.037138841	3.003508518	3.116283282	2.163090617	3.842468517	2.089256061	6.468543245	8.02368746	10.28994786	8.414990424	6.022536245	6.387990372	13.30152115	6.782243997
YALI1_A00204g	YALI0A00176g	2.020138585	1.486407079	2.460332828	2.338952102	1.624717312	2.994640178	2.719819583	2.186227991	30.34240365	21.94548076	12.99285436	8.585317941	12.30124483	13.11832417	11.11046863	12.67439712
YALI1_A00241g	YALI0A00198g	5.787581675	3.541671721	5.599912628	5.243235727	4.790868338	5.632171742	4.672262302	6.560083813	0.81660814	0.500290658	0.578777358	0.637400053	0.607856371	0.547769823	0.482209478	0.544519935
YALI1_A00252g	YALI0A00212g	29.59756274	29.43397933	27.17117478	20.71010331	26.0645775	26.09103181	30.23734305	31.55627494	30.31995501	25.11305664	24.13067149	20.18891359	27.61257476	22.90180202	24.72908391	27.866809
YALI1_A00271r	YALI0A00220r	0.381794693	1.548194981	0	1.209133025	0	0	0	0.162135747	1.234519364	1.008429012	0	0.867239013	0	0.776342892	0.257289625	0.170314349
YALI1_A00309g	YALI0A00264g	250.9643766	301.7986632	289.0535044	274.0173327	284.2930522	273.3470791	276.0907825	264.8197199	179.6305616	211.0269087	242.0501612	261.5003294	227.8668134	220.9161142	241.8605776	216.8249234
YALI1_A00325g	YALI0A00286g	317.9587581	359.0226749	314.8892641	274.8747846	296.714693	274.7855666	341.682922	259.7203755	235.2724032	213.5942833	222.5476059	241.744507	188.3035728	189.645771	241.533831	208.7158496
YALI1_A00375g	YALI0A00330g	31.80449491	40.0500324	33.56407964	28.25953759	30.58544174	30.11768643	32.31569144	30.69620704	41.18383148	34.89226344	34.04473328	34.08342573	38.72053087	38.41764404	41.01813165	43.11883162
YALI1_A00406g	YALI0A00352g	1465.106185	1542.500206	1637.952092	1458.280247	1481.621187	1431.199579	1629.539392	1260.69743	643.2143657	770.4483384	984.8452866	999.815591	824.6970021	783.8278935	946.7668122	754.6727115
YALI1_A00447g	YALI0A00369g	8.71524426	4.427935015	6.091368499	6.937939389	6.770233025	8.882880509	5.437455448	9.742420908	11.35136673	7.385632608	5.846925353	6.70701199	11.41115166	7.038842221	7.262363747	7.55702975
YALI1_A00468g	YALI0A00374g	7.578372997	5.173405779	8.295763069	7.096920138	7.817480399	6.030084692	7.706645895	6.929700136	31.02572678	39.46831628	6.162725389	3.146667605	9.582446037	7.580674002	7.948844244	6.815781376
YALI1_A00504g	YALI0A00396g	145.950956	95.76078053	114.768298	135.5229961	131.6766511	136.6735396	124.709366	155.3918396	128.8865054	125.6948968	122.3380155	133.8336042	143.3625476	134.4822276	128.5812527	132.2645749
YALI1_A00538g	YALI0A00418g	31.96175416	29.16245051	30.1629428	28.33750031	28.68581002	29.83744646	31.62920844	31.91021655	12.53380077	11.08493805	8.217745307	9.798373294	10.86921163	8.171248551	10.66481377	9.820935115
YALI1_A00558g	YALI0A00440g	196.9715181	170.1982349	176.0908742	189.108405	171.4038417	208.7863132	187.8967105	210.2931518	165.4961388	171.6778363	131.1796126	162.2204988	136.1337761	169.2841554	160.9603892	146.3389545
YALI1_A00574g	NA	11.7471466	10.83786883	13.21879713	10.97351195	12.82555378	13.36440752	17.18604083	11.77173078	10.93064021	9.486848455	8.812412806	10.04627138	7.8458247	9.279723632	8.371963179	9.161049148
YALI1_A00579r	YALI0A00462r	0.200324376	0.406162263	0	0	0.434304467	0	1.067352366	0.340284901	0	0	0	0	0	0	0	0.357449868
YALI1_A00601g	YALI0A00506g	64.25053468	52.57925721	52.19258672	50.33347807	52.92981952	65.29733058	46.31765394	64.56255762	38.50555887	43.40419777	47.83182182	43.56142176	60.80319801	46.49129134	51.72559356	49.4595641
YALI1_A00661g	YALI0A00528g	0.244924897	0.113802068	0.256864937	0.301649539	0.154874612	0.248279269	0.072499406	0.190687954	0	0.161729181	0	0.030907889	0.084215141	0.066404172	0.027508954	0.01820971
YALI1_A00683g	YALI0A00550g	5.266422406	3.483681218	3.180462468	4.014028702	4.474478913	3.902568458	3.214094906	4.395240027	2.005320459	2.443671181	2.027080662	1.739730727	2.475007023	2.23271546	1.986901394	2.013679048
YALI1_A00715g	YALI0A00572g	3.72141052	2.776743936	3.843957119	2.464484097	3.583011849	5.279765934	3.776785294	3.553359635	2.653249417	1.770496806	0.768096091	0.875063107	1.359048837	1.438224973	1.214978783	2.15501026
YALI1_A00746g	YALI0A00594g	219.0672835	330.9296775	285.280087	258.5873132	294.0554342	252.6353832	279.4502249	221.1990342	117.2578073	135.4851738	145.4307103	151.6973585	95.08085317	139.3649836	151.1207564	121.3014439
YALI1_A00789g	YALI0A00616g	17.3034809	32.80698887	32.18782848	18.4056916	18.30867048	20.23580361	19.18812535	20.81514158	29.87830795	29.26845157	36.0093953	40.84971065	33.78495629	30.75057227	35.07102623	30.62414194
YALI1_A00801g	YALI0A00638g	48.6063846	57.52454378	50.53096836	35.83915867	46.5907872	38.44510882	40.99776676	42.69815938	47.8605889	43.36845008	35.80302094	42.01334237	29.888856	40.98790099	42.69782582	39.29395331
YALI1_A00829g	YALI0A00660g	81.22668072	72.24767821	78.82148719	101.5689496	94.94622669	100.3495465	76.8070524	94.83155548	78.12277828	64.44468519	75.24658084	71.83905745	108.1932698	62.26817196	69.10927776	67.0265742
YALI1_A00867g	YALI0A00682g	25.83801663	13.45302549	21.90106645	22.24274219	21.76446294	27.90075623	23.77680359	21.30725332	5.948496173	4.003741514	5.510857491	5.227370612	11.01635966	2.342544625	6.017627401	3.042877377
YALI1_A00905g	NA	1.7109337	2.34993881	1.686846268	1.864422804	2.752072181	4.028204465	2.744620369	3.234442703	3.033810343	0.145776303	2.276721138	3.593830604	2.39110848	1.975185317	4.240027999	1.47721629
YALI1_A00911g	NA	9.40093678	8.159509756	7.640421332	11.96337966	8.375871856	15.8392978	7.776424379	12.9612088	2.706634718	1.700723533	1.918348366	1.950140638	3.58666272	0.837957407	1.822468175	0.861709502
YALI1_A00921r	YALI0A00715r	0.197881396	0	0	0	0	0	0	0.336135085	0	0	0	0	0	0	0	0
YALI1_A00947g	YALI0A00759g	19.73417191	19.47079751	21.80931395	21.28196258	22.91943117	22.57971193	20.2560286	22.00666214	19.11771396	21.85674855	20.25603115	23.95429957	25.01385767	21.09409133	22.89601925	22.51220852
YALI1_A00983g	YALI0A00781g	43.78908742	45.85941193	49.60310268	32.98992573	36.71846854	41.49969867	42.35448251	44.73199693	51.58378893	45.96076504	46.88997894	47.24067957	40.57638633	45.68137502	49.51958981	44.45376536
YALI1_A01061g	YALI0A00803g	145.0859337	157.7870566	175.5180648	143.9828112	147.5577425	154.5317783	163.8645838	142.7777916	97.46748516	106.729417	117.7985133	133.8265852	113.3009359	102.0279172	125.9121852	102.5952815
YALI1_A01074g	NA	12.22571368	9.571249788	10.12694898	9.527586653	13.80779822	11.33335282	15.11977257	10.60118344	4.139414042	7.185305339	5.207569255	2.665576848	5.348159796	2.603122123	4.399804825	3.826194146
YALI1_A01093g	YALI0A00825g	15.35576616	23.9683673	19.01013142	16.95784561	17.68998515	18.79380532	17.91365419	19.0753054	19.96601061	21.42911651	22.95558101	21.77712844	22.02966897	22.37400223	21.11872993	22.36746382
YALI1_A01122g	YALI0A00847g	275.4114781	179.9841544	190.9067449	161.4165564	148.2962553	163.0145238	196.0707893	305.4907695	178.4081505	158.0089453	96.67050996	133.2618518	118.7034198	195.4896841	217.9839521	215.8473352
YALI1_A01143g	YALI0A00869g	4.458570905	3.016813337	3.735734263	4.739791082	5.070798097	4.741910361	4.061296357	5.338794183	1.789417547	2.454557747	1.746853606	1.359827796	2.929646426	2.420451295	2.307990585	2.757470408
YALI1_A01173g	YALI0A00891g	238.5238928	217.404945	238.3895648	257.2868159	246.5552097	267.0685997	234.1244345	264.7527009	222.2847421	232.5971348	274.6323619	256.5144081	268.1664389	233.647283	241.181178	240.2341643
YALI1_A01198g	YALI0A00913g	67.73517839	91.14621008	83.39801684	61.28361472	63.6299301	63.47369233	62.84196519	63.99050777	84.79738091	86.58918792	86.22514396	82.04731141	74.8346036	86.42562498	79.31730018	85.10439878
YALI1_A01230g	NA	3.437341626	4.099581724	1.454081885	1.814327332	2.958952861	1.503082178	3.860423977	3.005319916	4.576567114	4.673016061	2.780294972	1.990236987	4.067119097	2.960260747	3.542741873	5.276561365
YALI1_A01240g	YALI0A00935g	3.751739755	3.835063915	3.878427224	4.422615655	3.727989208	4.479232282	6.774294206	4.115873725	4.953538683	5.450179922	3.86910991	3.692867474	5.031002813	3.305814627	4.171661256	5.188188542
YALI1_A01241g	NA	14.15821986	10.0793944	12.72722591	16.2897088	14.65777575	10.32062843	14.26798971	14.72733033	31.63455871	20.588759	15.67663868	16.74253095	19.03509888	14.94460067	18.43908977	17.74107799
YALI1_A01249g	YALI0A00957g	18.66200659	13.39931997	13.20169128	17.39407699	19.41427251	20.14003429	16.66766145	18.01031076	28.60787423	26.11230091	21.58948146	24.19207578	28.30270126	26.45392689	25.78007962	26.94012066
YALI1_A01260g	NA	1.456204117	1.687135556	1.683029874	2.305878685	2.367794544	2.671124186	2.032074696	2.031893493	3.867764996	1.373661315	2.622121139	2.205159029	0.858346634	1.649728646	2.102847894	2.412786607
YALI1_A01267g	YALI0A00979g	55.330588	50.40448462	57.88197979	63.19785343	66.27863816	69.56274506	73.78653311	58.94009242	54.74825007	53.62455243	60.23228916	61.18354279	66.25796252	50.65999021	62.3035083	54.35014137
YALI1_A01298g	YALI0A01001g	35.97348563	35.61795528	41.32099938	39.44661586	38.42692235	40.25807462	45.26342761	38.53231625	38.07859591	34.54777232	37.18644525	36.05221216	35.08283818	38.41141046	42.22471971	38.93876668
YALI1_A01394g	YALI0A01023g	129.338997	107.5955455	143.0417679	141.384892	143.0946679	172.6999505	212.6622925	105.4455865	118.338616	121.6104017	159.7397347	155.947632	204.938015	124.0971042	144.5678369	140.7824089
YALI1_A01430g	NA	0.797080148	0.404024567	0.409438847	0.360618621	1.23433901	0.923424649	1.011175925	0.773700406	0.920474965	0.30075953	0.521915021	0.689733952	0.704747763	1.29662883	0.153471004	0.152386523
YALI1_A01434g	NA	2.215635868	0.792750442	1.640221885	1.100683342	1.695357195	2.994640178	3.472110106	2.103206675	0.632133409	0.344242836	1.64277469	0.690772708	0.806639005	1.802113219	0.966127707	0.930230981
YALI1_A01468g	YALI0A01045g	69.92128476	66.2994385	74.18602648	78.73991269	77.9226272	78.8427578	76.56531688	76.08248972	58.95493685	55.64657674	58.94518068	65.6127963	55.31259545	66.34392618	61.06248208	63.74426552
YALI1_A01505g	YALI0A01067g	174.6958638	147.0135961	190.8211014	151.0500271	177.1877619	209.7243287	182.0182327	217.9690511	240.7579973	188.5020119	231.972587	183.9159907	233.6765105	190.0830201	202.9803516	207.1236295
YALI1_A01537g	YALI0A01089g	4.152597426	2.410077999	8.175024186	8.504416112	10.66838496	15.32246851	6.490157955	12.3178562	48.17034532	40.66459345	7.066138348	16.5541113	47.97515159	53.44994153	74.29793482	13.87468076
YALI1_A01577g	YALI0A01111g	36.90862804	32.36951698	37.40491394	36.98389838	35.91155058	37.46603134	39.35255399	38.49956297	36.4685905	36.60807404	23.17109941	29.27205419	31.3198982	32.04472915	35.1239321	33.12097979
YALI1_A01602g	YALI0A01133g	7.08972503	59.603384	57.77616264	42.50509064	53.143146	40.94918448	33.01572583	33.26549293	34.7542403	34.39627842	36.25735064	33.13670415	27.96766372	36.7625089	45.36513103	45.90028781
YALI1_A01618g	NA	55.1591279	61.4531168	38.9884279	62.48454729	61.28609633	68.5526648	46.58086834	106.4818869	140.0771854	114.1538471	71.44942782	85.61485351	110.0060285	99.06672395	94.63080034	125.1917579
YALI1_A01628g	YALI0A01155g	88.76182074	68.0639571	70.58940944	98.532352	95.55866321	97.37727414	80.88912941	126.1005154	123.1928584	109.3635922	97.55759352	119.2141475	113.2765719	128.5578274	133.3208993	129.7005534
YALI1_A01642r	YALI0A01177r	3.178342416	4.40916354	4.811961701	2.825465487	6.890665712	1.808769931	2.970980812	5.541030932	1.622692979	5.302049446	0.76673083	4.0530758	3.796192845	2.313021606	2.930979745	2.686401583
YALI1_A01654r	YALI0A01221r	1.298101955	0.328991433	0.583450356	0	0.703573236	1.754506834	0	0.137815385	0	0	0	0.24571772	0	0.263956583	0.218696181	0.289534393
YALI1_A01670g	YALI0A01265g	0.151748726	0.109883578	0.292309798	0.068654848	0.234994401	0.234403051	0.385016885	0.349831972	0.07009629	0	0.198725158	0.098484056	0.11180868	0.158691333	0.116871707	0.135386824
YALI1_A01689r	YALI0A01287r	0	0	0.589343794	0.692096344	0	0	0	0.696037297	0	0	0	0	0	0	0	0
YALI1_A01717g	YALI0A01331g	44.35725274	67.41017938	55.46198948	46.68259398	42.04350953	43.82593493	46.38960106	48.31618094	57.16889611	62.95924683	58.76953281	68.38525836	59.63352455	61.91041973	56.70715045	56.83991766
YALI1_A01732g	NA	13.1355555	21.26995897	19.55520425	12.92546963	15.46314804	13.17486816	13.19529024	14.63972951	14.22184396	12.71617903	13.34898034	14.40103856	12.99782046	12.61770481	8.731825542	12.77981478
YALI1_A01736g	NA	6.301465803	13.46841952	8.968897062	8.980454018	7.400042125	6.955569162	8.580269504	8.697087386	10.01798481	8.876786127	7.100324497	11.37140259	6.066760674	10.16531826	8.563831036	6.746432454
YALI1_A01766g	YALI0A01353g	15.85601046	44.0716041	35.5291246	19.12972875	21.31181569	20.25336747	22.91297501	15.12577802	27.48945972	28.43792374	32.64420831	32.80633904	29.23678413	28.15536889	29.71723945	28.39639325
YALI1_A01777g	YALI0A01375g	53.55890586	121.0836892	91.10014335	49.54212965	61.76103405	54.47106115	60.3455347	51.82756511	85.73566814	76.53255896	90.07694068	78.18011178	67.24468234	86.59628259	80.59968275	81.94403837
YALI1_A01786r	YALI0A01389r	45.72859161	29.90831213	30.49854135	40.48763613	51.16896261	27.91260872	29.4734801	33.20097905	41.73517169	28.24747176	26.19954097	65.89702501	29.6714825	40.49333948	39.762942	40.46901173
YALI1_A01794g	YALI0A01397g	20.10446911	25.0826802	26.51388764	23.77461383	25.69788769	25.41546246	24.4650788	26.00898857	28.4661779	31.70293407	31.31837144	32.00429741	31.74238903	27.06490995	30.83461049	30.53458455
YALI1_A01824g	YALI0A01419g	394.7095346	399.4833312	427.3968343	369.9033488	397.4719734	396.2846101	452.79649	367.9487018	405.1857156	437.4968427	420.1572494	354.4232399	312.884515	447.4943942	357.8452711	412.7602304
YALI1_A01842g	YALI0A01441g	16.6071729	9.066571427	10.60071774	14.57203978	16.05336116	14.25021982	10.36384114	26.54078442	27.29273092	25.03081778	20.1121056	24.08725822	23.79433584	24.31374725	24.1284519	27.73005452
YALI1_A01854g	NA	6.778064007	4.025633573	5.415994868	5.637518954	3.117096615	6.292535057	5.350272618	10.35069134	14.61108362	9.403494165	8.002146445	13.27083047	9.604790181	12.47389761	10.05817879	10.93389374
YALI1_A01864g	YALI0A01452g	383.0766086	314.1389075	389.8165892	342.2550809	316.4941094	362.1154476	364.1951349	297.3065873	457.2615778	375.599013	396.8961049	308.5387557	398.7811793	319.9512566	300.5126164	357.2329685
YALI1_A01868g	NA	22.34052278	16.21117208	19.23695015	14.89511697	16.69711846	21.45456726	23.80659842	19.22424751	25.47314413	21.1185496	19.26689011	16.55923768	18.92094536	12.05019185	17.98696851	16.62724683
YALI1_A01888g	YALI0A01463g	23.99211246	23.97597218	22.27347325	21.66115852	22.95870559	23.45498609	21.35603555	24.69071419	23.3800641	23.00810404	22.02481389	23.22679083	21.14243288	19.41238592	21.9463536	21.11061292
YALI1_A01905g	YALI0A01485g	38.698021	36.38293844	37.92964563	36.75088943	39.13059249	39.41985888	39.37999502	37.44872931	8.696199942	7.971789199	8.868590533	9.186132087	7.336255484	10.17180756	8.759929902	8.424757655
YALI1_A02022g	NA	8.99206042	18.84846754	15.68022832	9.278416612	9.087820964	7.858728525	6.604242763	9.876769239	17.48902433	10.89313423	10.38121596	12.90018032	8.647842336	10.77822715	8.930094058	9.047949776
YALI1_A02037g	YALI0A01650g	14.47371594	28.24302622	24.17461904	9.40999708	12.44682633	9.189107019	10.67948652	12.600997	13.82512258	14.88465635	13.08796676	12.40027974	13.12215399	11.35455694	11.24025064	12.57614472
YALI1_A02057r	YALI0A01672r	0	0	0	0	0	0	0	0	0	0	0.774717609	0	0	0	0	0
YALI1_A02075g	YALI0A01716g	9.33114001	7.09466259	8.183893356	6.036691489	6.579215374	7.282542677	5.646375492	10.84463301	7.109088134	5.861654007	4.9439994	4.548591388	6.516226926	5.062526073	4.841365839	7.459378441
YALI1_A02083g	YALI0A01738g	225.516313	231.7589779	206.6572254	174.2577081	193.1693439	195.6520661	214.8555869	207.6348328	193.4472996	183.3198211	149.502757	145.8050188	149.4047324	170.6650581	140.2883136	169.1160811
YALI1_A02096g	YALI0A01760g	13.0722211	13.88133253	13.23125125	11.39284591	14.14286559	14.24423971	15.47785913	13.36196002	8.232538384	11.54261545	9.43450016	9.878581264	12.09927023	8.602800431	10.77262219	9.978878566
YALI1_A02113g	NA	22.19754344	22.50301404	21.54876649	21.28611516	21.5762459	15.7905615	21.74837181	16.64809848	20.42718042	16.91471597	14.08126727	15.7259341	14.90776434	16.11894869	19.47853986	16.40694893
YALI1_A02131g	YALI0A01782g	40.2966641	34.60725767	38.18392384	36.7997772	37.08187037	40.22658556	41.31659537	38.42235203	22.84561031	20.64375622	19.01505839	19.83323659	19.92173104	15.29381949	19.10251982	18.32959878
YALI1_A02138r	YALI0A01804r	0	0	0	0	0	0	0	0	0	0	0	0	0	0	0.591070759	0
YALI1_A02150g	YALI0A01826g	21.94334942	35.22994584	33.24273338	19.34262747	21.71451599	22.38377339	24.04671869	19.26572289	38.45306652	33.76074707	41.10293296	37.95151544	33.16656985	33.73256227	34.47848587	34.8871653
YALI1_A02190g	YALI0A01848g	11.0805562	7.966459228	9.576388826	6.039539829	7.377895635	7.64374811	7.795889772	8.796726685	5.422129123	6.687100187	4.408119649	5.551676965	4.78221696	4.292303102	3.944064865	4.341549153
YALI1_A02198g	YALI0A01870g	1.639529813	0.651128879	0.759700985	0.678038137	1.099333181	1.644850156	1.0206557	1.435576924	0	0	0	0	0.104610996	0.137477387	0.182246818	0.150799163
YALI1_A02263g	YALI0A01892g	121.2089161	89.81162714	106.1971894	135.244653	132.0628902	148.2700823	133.3220137	128.2040175	113.3445463	110.524174	152.7959516	146.1140946	216.9954573	107.8663157	138.219444	131.4221659
YALI1_A02301g	NA	4.069446606	2.924368297	3.056168533	3.915287889	4.243775074	4.316643797	4.574367282	4.068835168	0.832810682	2.721157652	4.722088285	3.198230646	4.25085952	4.105991296	2.846521721	4.411952653
YALI1_A02318r	YALI0A01914r	0	0	0	0	0	0	0	0	0	0	0	0	0	0	0	0
YALI1_A02335g	YALI0A01958g	0.243090254	0.708502151	0.145680488	0.278004992	0.219592146	0.301179388	0.107934509	0.215067704	0.262007855	0.909600451	0	0.061352739	0.041792158	0.148290215	0	0.072293232
YALI1_A02365g	YALI0A01980g	2.60537483	1.384003782	1.723745433	1.914266478	2.394950642	2.563585772	1.998972061	3.000604716	1.347901682	1.376308061	0.620968257	0.820637216	1.569500878	0.915456358	1.151771795	0.911187235
YALI1_A02394g	YALI0A02002g	2.128228749	1.859516797	2.071671555	2.581820275	2.67663731	3.019531688	2.213595993	2.346856189	1.40672587	2.08079827	1.320388273	1.816174455	1.479714958	2.486547524	1.965096119	1.615517989
YALI1_A02426g	YALI0A02024g	4.32157058	3.196231681	5.310017201	3.806529892	4.930119548	5.681820008	4.344499579	4.809302929	5.068008725	4.474868551	3.176731503	3.594530583	4.523213585	4.104517501	3.321349036	3.702031042
YALI1_A02443g	YALI0A02046g	34.43298648	30.36844	29.44180259	29.79634476	33.3024665	29.73664146	25.56719436	44.76526394	39.44447641	42.24283275	34.66920895	36.36622261	36.01622476	41.77282134	36.38207237	42.80654639
YALI1_A02461g	YALI0A02068g	20.26401033	35.12907599	33.53349773	23.18908322	22.57052488	22.68477963	23.17254691	21.52325693	30.25260197	31.39753561	32.28349703	36.2074301	28.8442724	32.26544493	36.9164027	28.88623074
YALI1_A02470g	YALI0A02090g	15.36559842	19.93109828	19.66072963	21.60992555	23.7085521	19.63898055	21.26545564	19.32138727	22.26371896	24.62732579	26.20261743	23.14065479	22.90888333	20.29432181	23.97355952	24.36124013
YALI1_A02499g	YALI0A02112g	99.86731043	104.0928895	97.39731281	108.8972072	102.3464534	109.8321278	116.8110429	115.1769109	106.0534435	115.317219	98.96552628	99.53205793	84.26903912	113.2549713	109.0564956	99.05936694
YALI1_A02546g	YALI0A02134g	41.8398091	36.58847469	36.39460467	34.29132666	37.2848682	38.29777033	38.66432593	42.37602065	33.90602008	32.5738863	29.853409	32.39457425	36.33871348	30.87646087	32.79143736	34.06448832
YALI1_A02552g	YALI0A02156g	46.30224778	45.85941193	46.63182772	38.58437118	36.77769188	46.07795724	48.97691878	38.56046623	46.37241299	49.56836041	38.31330722	42.75240135	29.58694836	42.15973205	50.03503535	39.95720851
YALI1_A02561g	YALI0A02178g	73.38869787	79.16825817	82.65546714	56.86329928	62.80756512	59.78542121	77.83630574	62.99232882	63.12819056	49.90342201	54.25145779	50.2655428	41.27118746	50.07943395	57.3203689	54.00675775
YALI1_A02568g	YALI0A02200g	32.00181904	30.31711181	31.10191714	27.68797338	28.85022528	28.46818848	31.94433152	32.75242168	31.23040059	27.75958744	21.51173552	26.66275617	29.16561948	23.52681804	25.87133394	26.15767068
YALI1_A02615g	YALI0A02222g	77.17743316	71.94588514	84.69482424	91.40233495	92.79484556	99.97106736	86.49391515	99.22952379	98.01771425	106.2610251	114.1836787	121.8009543	121.866935	108.0605214	113.8715002	110.6155032
YALI1_A02653g	YALI0A02244g	11.58077311	10.4123305	10.97781158	13.05095963	13.66697139	14.31522707	13.55574695	14.81395338	11.21247553	10.97588894	11.85560885	11.50107332	13.04417716	11.2434468	12.09052058	12.89621831
YALI1_A02682g	YALI0A02266g	13.49110547	30.14194126	27.63178079	14.58327107	15.04160365	14.67637753	16.78801472	13.08853891	14.70139996	17.43064126	21.8390983	19.71492273	18.07169844	16.38667846	18.36992589	16.30805672
YALI1_A02728g	YALI0A02288g	29.92411736	19.22419822	24.82592982	24.82040937	23.74912871	26.74037523	21.17987164	26.41184803	35.06233311	36.79955911	36.24558338	34.43995358	52.76763493	32.6076486	39.20721896	38.31388853
YALI1_A02775g	YALI0A02310g	517.5212977	510.6428066	510.1179641	537.915521	514.349314	510.7603562	467.0879989	580.423681	582.2754237	573.6276983	577.075768	582.273541	620.296198	558.7346563	572.7023734	562.6210572
YALI1_A02813g	YALI0A02332g	19.48032406	17.8538034	18.5391746	16.54912081	17.25565795	17.71148497	24.1521014	18.20731709	16.38707361	16.81227433	13.17649788	13.268091	16.57900012	12.80439794	17.30603926	16.85027395
YALI1_A02819g	NA	2.415561891	0.585583457	1.510551084	1.21956783	1.821548831	1.561454302	1.212429386	1.91781927	4.244908818	4.160993497	3.489990007	4.930258467	3.791725421	5.210793392	5.23738427	4.872423439
YALI1_A02833g	YALI0A02354g	152.1445423	111.5801585	144.5660327	162.2965927	154.9282479	171.9652994	172.7170192	153.8984865	138.7109283	127.968623	146.4670157	146.9838727	168.121494	131.0717741	150.3628288	142.6029999
YALI1_A02875g	NA	3.448703589	2.137941272	2.408740003	3.090622894	2.797080143	4.895986195	2.952355397	3.982738183	1.283598116	2.162571391	1.364640193	1.690718259	1.842689104	1.856575357	1.571669802	1.5937673
YALI1_A02895g	YALI0A02409g	13.90339085	22.39685672	20.0580112	11.0974069	12.09381372	12.65004927	17.31519904	15.45202798	21.76533749	21.80978002	18.53493666	20.33525962	17.1750049	16.64553793	17.2306082	17.21474081
YALI1_A02947g	YALI0A02431g	13.10053319	12.33329547	13.80116282	12.84299462	12.35737695	14.24811971	13.68811377	15.03085641	14.61547359	10.48185302	7.971032173	10.44126291	12.10682122	11.19136033	12.06029931	12.50821385
YALI1_A02974g	YALI0A02453g	21.5074341	14.45895072	21.19436309	19.23220542	19.9637753	20.98279798	20.16918271	23.49303762	15.72407692	17.54397743	14.53991634	13.79411405	19.02649622	13.95314398	14.92369745	16.07681142
YALI1_A02977g	NA	2.178527587	4.188548342	1.620695434	2.22047577	1.9543701	2.030679205	2.134704732	2.296923079	3.157740504	2.1825952	4.13182725	1.365098446	1.239834027	2.199638194	1.012482319	1.474480704
YALI1_A02998g	YALI0A02475g	0.861835089	2.38006623	2.404328391	1.945094945	1.481885021	1.044349306	0.633373931	1.085359257	0.960935403	1.255918916	1.498354937	1.845133065	1.532761846	0.966873931	1.522061333	1.140107957
YALI1_A03017g	NA	0.393841613	0.984844906	1.416141641	1.108698027	1.081544618	1.348528715	1.119165587	0.869708739	1.952658056	1.595047507	1.323789313	1.749446553	0.758345084	2.263705326	1.415509262	1.967709466
YALI1_A03029g	YALI0A02497g	863.4557071	977.2702363	669.8485805	740.7534555	877.4840543	751.0299036	652.9086567	994.1545775	1155.91127	941.2366858	1424.499464	1107.409107	1441.815477	1038.624846	1039.698427	1303.408155
YALI1_A03069g	YALI0A02541g	25.06532394	23.31798931	26.30644589	25.28838082	26.53828872	24.74008539	28.70475658	28.44557897	22.25248227	24.90664858	21.80626197	22.67500367	20.93688145	20.78079241	23.37555233	20.5150356
YALI1_A03081g	YALI0A02563g	41.82387316	42.98586821	42.0167458	39.57162626	47.03029652	46.5992011	51.42126986	39.94435215	41.15064548	40.71914118	36.85501525	34.12016117	28.1647858	38.86419569	32.86290207	35.01766231
YALI1_A03091g	YALI0A02585g	19.50959684	23.74977259	22.61369172	20.72940179	23.03978827	20.36634276	22.84634873	23.30602303	28.4132536	24.55026838	26.79023475	25.05215859	24.44400047	24.37018504	27.23547748	25.47223397
YALI1_A03116g	YALI0A02607g	13.22561141	8.652960388	6.981457255	15.944835	18.28634401	16.69985137	9.471819246	22.65869107	22.91102954	27.30672189	11.52866484	15.90387421	15.89241798	22.69370314	17.26459362	21.81069105
YALI1_A03137g	YALI0A02629g	22.37469182	20.29249155	22.44039832	25.8648826	30.56835284	32.74079704	25.12383261	35.21948721	29.5968104	27.22901984	18.96402763	27.02194874	25.36891162	22.52279108	26.48030682	25.65390204
YALI1_A03153g	YALI0A02651g	796.6243625	657.8630156	535.7328317	512.6334929	572.4702449	573.011066	600.5169376	526.7359231	604.374808	604.6992222	502.8636967	416.4669195	433.1085783	580.2958073	512.2031868	545.7380505
YALI1_A03170g	YALI0A02673g	182.5765536	132.4964863	124.4100251	161.5305318	157.2298205	158.9324256	138.2262052	225.7998123	240.6409645	219.5802855	167.7648026	205.6713591	173.2975645	190.8144156	196.4648517	211.9016024
YALI1_A03183g	YALI0A02695g	203.0684642	251.9185389	241.2918214	204.3701123	202.2599588	206.9850887	238.7048304	183.115057	145.1382049	160.2745756	181.6781556	188.0200979	129.4452751	162.5259298	178.9038285	147.2228136
YALI1_A03210g	YALI0A02717g	23.17314819	24.26311821	24.31043151	24.26662806	25.54117424	25.0382746	23.83531252	25.68247118	42.13761799	36.42949807	35.83068943	35.37311349	35.11442432	36.56898498	37.88455719	36.73467609
YALI1_A03242r	YALI0A02739r	0	0	0	0	0	0	0	0	0	0	0	0	0	0	0	0.321704881
YALI1_A03258g	YALI0A02783g	0.060097313	0.121848679	0.108046362	0.12688433	0	0	0.106735237	0.076564103	0.582967478	2.698481338	0	0.091006563	0.619917013	0.146642546	0.809985856	0.10723496
YALI1_A03278g	YALI0A02849g	191.4776564	226.6256717	202.0847419	147.0875318	154.0924481	153.1074919	188.4703748	139.6270424	131.5371689	139.2389542	127.795671	145.238784	73.08035777	134.2398915	146.978208	124.9891428
YALI1_A03289g	YALI0A02871g	81.35064619	73.43029515	83.70672904	75.61620191	85.252793	80.81005573	98.0089098	92.74602918	77.75525681	69.49983733	46.56680981	63.53241959	59.10992495	58.91463379	70.33742038	62.34118909
YALI1_A03300g	YALI0A02893g	2.313746541	1.858192355	2.052880883	1.691791063	2.28009845	2.138982096	1.672185373	2.364980059	3.206321127	3.571519418	3.787508312	3.306571793	3.926141084	3.723091314	3.901431871	3.243857549
YALI1_A03322g	YALI0A02915g	1420.014407	1464.54564	1380.531319	1274.496949	1268.559148	1266.971306	1438.247867	1163.076475	1162.091497	1268.869191	1265.874862	1098.119016	1109.580136	1207.231518	1038.839116	1139.838827
YALI1_A03351g	YALI0A02937g	68.51093653	84.27866966	85.3566262	57.57376462	63.46274018	63.76332705	68.08818633	65.6324502	79.42931883	78.24273096	72.1348174	70.5680058	68.55248972	76.2948581	68.03881187	69.9708116
YALI1_A03356g	YALI0A02959g	26.32262298	23.7903329	26.10311911	24.92111815	24.0267867	24.9649215	27.40699483	26.89431295	23.00936942	24.43210835	21.08075127	22.69963702	23.85035824	20.12893401	23.87309332	22.78195789
YALI1_A03396g	YALI0A02981g	301.9386357	264.6634995	264.6170098	256.2390052	278.8089099	257.417518	271.8707473	273.4749981	232.2913706	257.3090191	271.7657437	258.2323938	259.3573476	291.3844741	281.1488055	287.8360067
YALI1_A03402g	YALI0A03003g	137.5415381	181.6871318	168.170985	161.4864328	156.1656673	135.8882744	189.5806158	128.8979187	115.7361904	131.9361291	137.8085912	130.4712915	91.10592154	136.0670309	146.1833884	123.5346743
YALI1_A03422g	YALI0A03025g	160.6384424	130.1536285	153.6298848	180.9810513	179.5237178	182.9648251	159.5576129	199.5834153	175.4858447	165.9927229	165.1707537	183.4134439	161.1246845	178.5588652	165.2070222	164.3234668
YALI1_A03437r	YALI0A03047r	0	0	0	0	0	0	0	0	0	0	0	0	0	0	0	0
YALI1_A03442g	YALI0A03069g	0	0	0	0	0	0	0	0.025240913	0	0	0	0	0	0	0	0
YALI1_A03450g	YALI0A03091g	0.635690699	0.185685736	0.116225171	0.545956479	0.887642197	1.01938478	0.497530784	1.711253449	0.592257796	0	0.246921947	0.277370601	0.177824801	0.797478389	0.304954834	0.576761739
YALI1_A03487g	YALI0A03113g	174.4324502	218.5240512	182.2444073	173.9518531	165.4812338	192.0882482	185.7469156	236.543475	235.6495261	223.0352299	183.047071	198.2687813	149.677894	224.6664942	193.1816266	225.1795501
YALI1_A03507g	NA	1.555017967	1.233717875	2.309490994	1.712938452	2.93155515	5.300072726	2.761774246	3.560230772	0.437225608	0.535727913	0.309887044	1.023823835	0.836887968	0.714882413	0.364493635	0.241278661
YALI1_A03512g	YALI0A03135g	5.567547377	3.591741337	5.888031118	6.893660557	6.024480307	8.155505771	5.49931274	4.981583632	1.21941821	1.415501274	1.341896189	1.502860675	2.067906661	1.283458616	1.324215408	1.168762687
YALI1_A03529r	YALI0A03157r	0	0	0	0	0	0	0	0	0	0	0	0	0	0	0	0
YALI1_A03549g	YALI0A03179g	0	0	0	0.102417845	0	0	0	0.247202484	0	0	0	0	0	0	0	0
YALI1_A03567g	YALI0A03201g	1.220874542	0.805928271	1.480320239	1.168934376	0.707882083	0.921000962	1.563208977	1.121332527	0.137708853	0.899910405	0.292806655	0.45144988	0.263586762	0.219386487	0.420937531	0.392631941
YALI1_A03579g	YALI0A03223g	5.260572992	5.858751553	4.529066693	5.788011206	5.78279372	6.609443551	4.539902871	5.569251849	6.827906758	5.088192048	5.348735275	3.478196042	5.808537495	4.610200599	4.693479684	6.180699938
YALI1_A03599g	NA	11.21816505	10.35713772	8.643708982	7.754042373	9.844234576	13.71836619	11.02930778	9.301120616	10.79569403	10.2295371	10.86517536	10.61743236	18.73526974	8.472680452	8.369853841	10.0085963
YALI1_A03624g	YALI0A03245g	25.12614012	21.70346517	23.95682523	25.82903556	27.63123981	32.27229236	26.42570394	27.11204478	30.46270056	26.26040823	31.50706088	28.33944375	32.50168545	28.08338073	28.48352079	28.83938028
YALI1_A03627r	YALI0A03267r	0.174476069	0	0.313682987	2.210243163	0	0.943283244	0.309876493	0.444565757	0	0	0	0	0.359951814	0.567648566	0	0
YALI1_A03632r	YALI0A03311r	3.283888875	5.091534088	2.431043151	6.117637327	5.863110299	6.788270487	5.832318284	5.08604396	1.249216023	0	4.869653544	4.387816435	1.59407232	5.813329513	4.686346736	8.617095025
YALI1_A03643r	YALI0A03355r	0.162262744	0.328991433	0	0	0	0	0	0.275630769	0	0	0	0	0	0	0.218696181	0
YALI1_A03669g	YALI0A03399g	20.46261392	39.00830507	38.12381543	22.01406449	23.40160498	22.64970286	22.09974667	25.73748779	44.2027508	48.53550377	40.96599243	50.14961374	44.19864972	46.17333007	48.97488177	44.89456698
YALI1_A03688g	YALI0A03421g	2.219779355	0.982537036	3.091499961	2.244312422	2.372356768	3.718607932	2.998458091	2.018105826	3.841519795	4.624395085	2.364456056	2.27253383	5.611503138	2.339499582	4.803731144	2.25937243
YALI1_A03721g	YALI0A03443g	50.86553248	42.77974414	49.55155941	50.82282732	52.5744907	56.74642564	51.39143124	58.92403661	53.62146403	54.66900021	52.93647981	56.71240675	58.95963198	57.82217233	57.63330051	56.52928093
YALI1_A03732r	YALI0A03465r	0.327803524	0.498471869	0	0	0	0	0	0.835244756	0	0	0.375620659	0	0	0.266622811	0.883620933	0.584917965
YALI1_A03757g	YALI0A03509g	87.28749437	114.506515	107.9078413	71.20162965	84.53903483	76.74926023	100.9469026	57.05007237	42.42707754	39.94810609	50.67668464	43.04143734	29.96265564	41.78059214	53.25137779	42.69463708
YALI1_A03763g	YALI0A03531g	9.180823522	12.31449416	10.39084165	8.045006439	7.872923522	10.36942573	8.65236705	9.318014192	11.78338519	12.02327104	9.875360164	8.82957293	11.36954182	9.838570835	9.8577002	11.47642235
YALI1_A03803g	YALI0A03553g	38.7102441	32.74918688	36.54947634	36.51281408	39.27795889	44.95793373	37.0311621	45.97123575	38.67964953	42.04285641	34.04704262	39.10252268	42.55092689	36.45488365	38.00962163	38.32916655
YALI1_A03809g	YALI0A03575g	77.61057681	59.33226008	75.40820642	55.0510408	50.33424879	63.86294528	75.94312776	64.22716986	74.245858	79.78639606	55.77966787	59.96130535	67.582651	69.80738571	69.25379065	79.25776382
YALI1_A03815g	NA	33.03018325	27.57565736	30.77747834	40.13486857	33.92634697	37.90075441	32.45580204	46.29526516	45.33562617	55.34121351	31.65059903	54.94852582	40.73396453	44.50530094	47.84421306	42.72740554
YALI1_A03837g	YALI0A03597g	410.3963814	366.0724827	374.6469259	420.9960292	409.7517287	441.3254934	349.0956691	432.4272183	552.1990927	602.9710025	654.2450925	614.9588519	662.4712356	657.2768782	567.2792622	602.3255036
YALI1_A03842g	NA	5.317854649	3.732255757	5.311522851	5.373924554	3.153269405	6.388960458	4.520551196	5.134298647	3.821131366	4.201787551	2.291601668	2.340168765	3.46945152	4.362307679	5.08453306	3.365735939
YALI1_A03857g	YALI0A03641g	24.53652384	28.77476094	28.40705816	23.37187158	29.67451743	27.92035899	32.03924186	27.5095044	25.03530888	25.11517445	23.16473411	23.30617056	25.66781756	23.62526853	26.88539057	29.08005782
YALI1_A03883g	YALI0A03663g	20.26711992	20.51414606	23.60373292	25.42850492	23.89558325	23.37642341	24.57392656	25.06584081	24.6574907	19.31112244	22.70102762	19.66694157	26.4690148	18.78644481	20.89480954	24.77314621
YALI1_A03900g	NA	31.66451789	22.29588743	26.85417203	22.38542082	26.09278226	22.36705732	25.12872623	27.44138566	22.12187846	21.00337247	15.26860666	21.1002634	22.1692177	16.49000289	19.06953455	20.74037759
YALI1_A03907g	YALI0A03685g	30.6888234	26.61135417	30.12379557	22.5909274	27.722315	28.20878288	38.11144045	27.28844484	21.67118232	24.76771075	24.04992926	22.88023701	24.68213065	20.53792618	19.37362908	23.62957318
YALI1_A03933r	YALI0A03707r	0	0	0	0	0	0	0	0.316816976	0	0	0	0	0	0	0	0
YALI1_A03937g	YALI0A03751g	27.13831272	24.31768394	27.07662818	25.72179422	27.05000014	28.61719884	30.04959602	28.68700824	24.58651187	21.91456575	20.07345976	20.7707018	19.89030821	20.25375595	21.72806717	22.37566764
YALI1_A03964g	YALI0A03773g	85.28189961	107.7422096	103.4405189	59.34046599	72.87261562	71.9118108	93.94313134	60.44169189	44.48869633	43.72144013	46.92307744	48.40119447	29.22786982	44.47123503	60.58743142	46.28759805
YALI1_A04006g	YALI0A03817g	123.7349553	226.8377742	185.8653465	116.3066266	190.5649783	183.8351749	304.6658687	125.4925557	14.67088771	15.9787409	13.0416917	11.37366383	12.79790763	12.38469277	15.0979828	11.93814795
YALI1_A04022g	YALI0A03839g	204.1856844	243.6220583	255.596417	190.1767996	208.3270689	203.8163057	235.4051639	171.7014522	141.5824947	155.7824537	165.4355776	169.5943092	128.38551	153.2496992	169.2233371	153.5327508
YALI1_A04044g	NA	0.600973127	0.06092434	0.324139087	0.761305978	0.39087402	0.324908673	0.426940946	0.306256411	0	1.904810356	0.27545515	0	0.991867221	0.097761698	0.809985856	0.214469921
YALI1_A04071g	YALI0A03861g	13.33420975	16.67443437	14.20281361	12.87855934	14.88897095	14.34415419	15.1971448	16.22337783	21.54405047	20.68551941	19.43392564	18.8616126	21.61300578	20.73349818	22.19156831	21.79880392
YALI1_A04109g	YALI0A03883g	44.74124739	41.17997956	40.91931832	46.43966469	45.66450884	47.56662971	43.45404952	51.16115423	39.92161287	41.15660243	38.49761176	42.89685358	44.95142247	37.399715	42.59877612	42.38783511
YALI1_A04119g	YALI0A03905g	97.54241789	129.7404623	123.8171046	95.8252525	105.171817	96.94285946	123.5377494	75.25633069	55.50864243	52.66327391	58.74380481	63.92221856	40.02507673	48.84289779	65.72205108	46.33749186
YALI1_A04155r	YALI0A03916r	0	0.414695084	0	0	0.591238013	0	0	0	0	0.360153219	0	0	0	0	0	0
YALI1_A04164g	NA	4.739102377	3.916564683	3.982280209	3.153981911	3.12699216	5.012876667	5.855190121	4.156337	14.1577816	16.73511956	5.430401528	7.722556926	5.84493184	9.008042128	5.554188724	7.261338741
YALI1_A04178g	YALI0A03927g	15.26393695	17.99483446	18.47592795	13.19926599	15.39637536	14.88672465	15.96870033	15.49379022	25.64299801	22.59797741	20.60547615	22.27415179	23.40387997	19.6539101	22.21991069	21.50826918
YALI1_A04261g	YALI0A03949g	2.171879654	1.322273829	1.678065184	2.652780788	2.295952484	2.878892113	2.75221058	2.434128661	1.180122217	1.738350159	0.904979862	1.105367326	1.370126319	0.992757061	1.782148083	1.163689116
YALI1_A04309g	YALI0A03971g	12.334258	8.481054882	11.64499682	10.15074638	10.65080001	11.78438599	11.08013408	9.860160095	5.922209297	5.240748071	4.262996369	3.712489955	5.411973926	4.073404063	4.512778338	4.970255303
YALI1_A04332g	YALI0A03993g	7.202036249	4.779465565	6.03210707	4.763251309	5.079272024	5.629433691	5.702058895	6.829354181	2.431629051	3.590618453	2.386295952	2.014797707	1.551450065	1.858517832	1.9881471	1.445091444
YALI1_A04338r	YALI0A04015r	0.373017803	0.378151073	0	1.575115817	0.808704869	0	0	0.633633953	0	0	0	0	0	0.606796743	0	0
YALI1_A04341g	YALI0A04059g	7.985293846	9.122035198	10.06009857	7.370826064	6.140275513	7.73578013	10.39213076	8.619725881	5.691882463	4.415696735	4.237001034	6.105713052	4.889454552	3.959348749	3.857005374	4.325468354
YALI1_A04359r	YALI0A04081r	19.83211321	24.77589807	24.13035424	14.38022404	10.85761167	16.7869481	25.26067266	13.27111112	11.01160791	11.11139375	10.55911408	9.40401152	9.505394204	9.776169752	12.14978783	9.651146428
YALI1_A04385g	YALI0A04125g	11.20884763	12.45406847	8.894979592	8.232727441	11.81712153	8.424957448	13.60253713	8.985895456	4.880657952	6.940006725	5.573162337	4.740807008	5.103502854	5.661084345	7.346383341	7.381755407
YALI1_A04398r	YALI0A04147r	22.64917474	26.55920426	23.09490994	20.34114411	36.64443937	19.18991849	35.12256379	24.97903848	20.76821639	20.08979673	18.59322262	14.33353369	13.59942948	12.51044223	16.17440505	19.60389118
YALI1_A04415g	YALI0A04191g	52.21050602	44.7676432	47.32097363	48.08557298	56.91286501	61.94145805	77.59020617	57.97221282	29.13338757	34.08092566	29.53884725	31.54114354	36.34402932	26.80278931	33.48843834	34.42407627
YALI1_A04438r	YALI0A04202r	0	0	0	0	0	0	0	0	0	0	0	0	0	0	0	0
YALI1_A04439r	YALI0A04213r	0	0	0	0	0	0	0	0	0	0	0	0	0	0	0	0
YALI1_A04446r	YALI0A04235r	1.05823529	2.145596305	1.26837034	0	1.911883793	0	0.313244716	1.19839465	1.140588543	1.863401436	3.233603934	1.335422393	2.183186003	1.291091984	2.614845643	0.94413389
YALI1_A04462g	YALI0A04279g	0.030090449	0.045756806	0	0.031765201	0.065236276	0.081340141	0	0.070281374	0.19459276	0.079477484	0.068959565	0	0.03103896	0.012237208	0.02027781	0.040269039
YALI1_A04495g	YALI0A04301g	3.478423967	3.29378938	4.398212344	5.770322699	6.629665356	7.801252411	5.56682718	6.736558853	8.899008846	8.935108651	4.905632353	6.59877977	6.545272211	6.047061891	7.39290977	7.332143046
YALI1_A04533g	YALI0A04323g	6.364369127	7.885719281	7.662510568	7.101935629	6.836842398	7.129621408	8.180520429	9.122761628	7.415840705	9.28847453	6.789044774	7.26444615	8.713886498	8.378833828	7.521706108	8.6280567
YALI1_A04561g	YALI0A04345g	81.54390461	79.11903209	78.58999385	84.32431473	81.25542126	84.21467593	76.82223426	91.15021303	83.64101183	90.39777963	88.16899165	91.09139973	79.59104027	93.72695627	87.51965813	89.15042039
YALI1_A04576g	YALI0A04367g	42.72918936	49.66204018	49.08391886	47.30972866	45.5647429	47.48308176	43.22777081	52.41359711	76.86842598	75.37606696	63.03987861	67.27985201	66.52595149	72.29477531	73.28057748	71.32656789
YALI1_A04602r	YALI0A04389r	0	0	0	0	0	0	0	0	0	0	0	0	0	0	0	0
YALI1_A04611r	YALI0A04433r	0	0	0	0	0	0	0	0	1.457418694	0	0	0	0	0	0	0
YALI1_A04620g	YALI0A04455g	11.11060171	9.507798403	9.915781917	11.47584381	11.7262206	12.3161194	13.06060727	12.08430467	11.71678477	10.69696456	8.121177697	9.23963185	7.310745468	9.535377393	7.900354651	10.50691311
YALI1_A04645r	YALI0A04477r	0	0	0	0	0	0	0	0.186237006	0	2.316661244	0	0	0	0	0	0.195631347
YALI1_A04653g	NA	0.100162188	0	0	0.422947766	0.434304467	0	0.177892061	0.17014245	0	0	0	0	0	0.081468081	0	0
YALI1_A04661g	YALI0A04499g	0	0	0	0	0	0	0	0	0	0	0	0	0.44634025	0	0	0
YALI1_A04676g	YALI0A04521g	0	0.044944185	0	0	0	0	0.078739109	0.075308953	0.143352658	0	0	0	0.091463166	0.072119285	0	0.079107758
YALI1_A04699r	YALI0A04543r	0	0	0	0	0	0	0	0	0	0	0	0	0	0	0	0
YALI1_A04709r	YALI0A04565r	0	0	0	0	0	0	0	0.582318527	0	0.603637085	1.57125825	0	0	0	0.30802279	0.20389746
YALI1_A04710r	YALI0A04576r	0.54542099	0.138231695	0	0	0	0	0	0.463244991	0.440899773	0.360153219	0	0	0.28130688	0.110906127	0	0
YALI1_A04715g	YALI0A04587g	93.61040244	88.51948153	84.21260589	62.3972351	61.92670747	70.90653979	92.92244126	77.52490705	121.0514821	113.1681447	76.56032845	86.29563513	73.2960704	97.47416311	80.61741574	88.7842392
YALI1_A04742g	YALI0A04609g	26.35435199	36.1006773	34.45044044	29.46930297	32.77748669	32.18760138	29.53739676	34.33673333	39.56604106	45.84233148	51.31484796	45.35135447	51.7182082	42.25258959	50.32170349	52.75589663
YALI1_A04781g	YALI0A04631g	20.41615751	12.97431005	13.69601775	11.41958968	13.542959	16.26831454	15.15339697	22.38691226	15.27210575	11.46910461	6.634201499	5.768021605	8.486751225	9.294245891	6.468478593	11.21436029
YALI1_A04795g	YALI0A04631g	8.670158582	4.828481236	6.821434514	5.010984127	5.355557467	7.46320071	6.652632059	8.639173371	4.385307593	4.563015854	2.812109292	3.32513532	3.997076862	3.033530883	3.438208617	3.802839786
YALI1_A04815g	YALI0A04653g	27.67073913	25.08909785	24.54923732	23.40006293	25.04204674	28.98325794	27.19546725	32.55403358	22.05884797	21.49928389	17.85046782	19.32593203	19.18210798	18.63426305	20.73818403	20.80969195
YALI1_A04817g	YALI0A04675g	53.81714356	58.73106329	52.18639298	39.08037356	42.08410281	47.35543907	52.46036878	48.33747013	46.73455946	43.09633431	33.67439208	43.77415685	34.77734445	36.70951742	38.51482743	35.76285926
YALI1_A04848g	YALI0A04697g	61.01024139	49.73937489	60.11419171	59.91652395	59.79477374	66.66828341	56.32931741	62.57800358	46.63739821	46.98411041	48.44646302	46.2049352	62.56429644	42.61029408	46.68857401	47.13222082
YALI1_A04859g	NA	1.825886508	1.816088592	1.362622913	0.94557112	1.045650244	1.955660483	1.896759937	1.492268497	0.556975297	0.272982376	1.263233809	0.730371143	1.066099322	0.560417374	1.160807755	0.706931108
YALI1_A04864g	NA	12.96429144	10.65547856	11.37828444	9.653673747	10.15466526	10.55115793	12.82473384	10.6321491	7.482417625	5.891166051	6.453317818	8.190590679	8.685229084	5.26099032	6.275302788	6.044403562
YALI1_A04884g	YALI0A04719g	0.37735522	0.191274089	0.565358872	1.062287412	0.545405609	0.340020704	0.558498331	1.282003579	0.813442992	0.830585911	0.576534035	1.333351971	0.908250508	1.023087532	0.50859577	1.290560278
YALI1_A04893g	YALI0A04741g	6.510088992	8.319893966	7.905473656	6.114561592	6.278745569	6.549629582	6.389625249	6.963522456	9.047866282	8.683694272	8.057997939	7.103453455	10.01404406	7.590908278	7.60873591	8.47204709
YALI1_A04916r	YALI0A04763r	0.438547958	0.444583018	0	0	0	0	1.947196884	0	0	0	0	0.664101947	0.904743749	0.356698086	0	0.782525386
YALI1_A04927g	YALI0A04785g	13.35667607	8.586218009	11.78782338	11.75006012	11.7262206	14.66790279	13.37450858	11.84651003	10.90955215	9.600611684	10.04392733	9.32305177	12.27076892	8.954154192	9.774523846	9.216689675
YALI1_A04958r	YALI0A04829r	1.410980386	0.357599384	0	0.744755848	0	0	0.626489432	0.299598662	0	1.863401436	0.808400984	0	0.727728668	0.573818659	0.47542648	0.314711297
YALI1_A04976g	YALI0A04873g	73.39600856	50.27271164	68.17701502	78.89898322	73.97139158	83.54331319	70.65115338	89.40174662	61.19219599	41.59117513	36.96656974	47.963082	69.35098224	33.86760004	55.52264462	46.06228977
YALI1_A04983g	NA	2.05731905	1.715599499	2.028355022	3.432882786	2.086260106	2.690961401	2.475209781	2.19828221	1.9313033	1.928182263	1.749055707	1.658217745	2.395998272	1.808291522	1.699479525	2.072332055
YALI1_A04990g	NA	7.53118223	5.136153179	9.847263397	11.27503791	11.42935425	14.80596484	11.55172497	9.187692315	0.44276011	1.627527836	1.098333826	2.280923987	3.107432117	1.113740858	1.476429914	0.977331284
YALI1_A05003g	YALI0A04895g	169.101703	133.9163847	159.7943364	186.3369585	168.8463014	191.5477212	170.1400723	209.1083434	206.0005269	166.2817021	158.9362972	169.3247112	173.7079	172.2062902	177.0948402	181.3301935
YALI1_A05031g	YALI0A04917g	170.409105	172.3904333	191.6163742	171.0132656	171.1682471	192.8017644	208.7395059	172.0491326	198.4810894	195.0558566	196.6830986	215.048285	189.0091941	183.3211979	223.7650606	190.5567879
YALI1_A05052g	YALI0A04939g	33.65990931	45.18280747	44.03619306	27.20582926	35.87120135	29.05151872	43.32873658	22.74850545	15.45826675	14.2717773	17.08566403	19.52131772	13.60466527	13.23305861	19.16966525	14.96942081
YALI1_A05091g	YALI0A04961g	163.8487712	188.4898287	168.5279538	132.0551047	134.2784509	124.1126701	143.8758888	166.3455872	201.189528	163.9139438	120.7860477	144.7209631	116.0316852	147.193834	140.9192685	139.0708431
YALI1_A05116g	YALI0A04983g	234.8852166	200.6379666	208.7139486	231.2118751	227.5172801	243.2951803	230.8409821	228.3337619	227.5705971	230.3194474	226.5198707	205.3890498	224.9391563	208.7242047	217.8516226	217.7834155
YALI1_A05143g	YALI0A05005g	0.774986242	0.360090126	0.464438095	0.613589893	0.560058297	0.523733383	0.516152487	0.630796786	0.208824171	0.42645008	0.148005752	0.342293342	0.166544869	0.144453852	0.21760814	0.115237569
YALI1_A05168g	YALI0A05027g	97.58647873	101.1226874	97.91493799	103.0398361	103.280943	123.2653519	110.6926507	105.8174794	83.81278582	81.15591047	85.95789843	77.0860592	91.92892449	68.59487107	82.34752354	73.38583265
YALI1_A05186r	YALI0A05049r	0	0.396375221	0	0	0	0	0	0	0	0	0	0	0	0	0	0
YALI1_A05189r	YALI0A05093r	0	0	0	0	0	0	0	0	0	0	0	0	0	0	0	0
YALI1_A05210g	YALI0A05115g	8.525669622	13.02954773	13.21828208	9.329224109	9.53997608	12.93577072	13.38351322	9.966310308	7.529173186	10.65402403	8.823902262	8.135061251	8.435074209	7.724831082	9.538613093	7.802706519
YALI1_A05220g	YALI0A05137g	71.57758445	73.99745012	87.88107391	85.70028514	84.49454282	102.346232	107.2838756	78.05245154	82.0513104	97.06521933	89.66451284	87.80007018	71.95672248	96.04401536	88.36415787	84.51517947
YALI1_A05229g	YALI0A05159g	11.25248636	11.69491692	14.58625891	10.18180198	13.16124759	10.58225275	14.81231308	11.54886499	14.18690085	12.23807353	12.8288902	12.1713323	8.427403314	12.49025324	12.5151311	13.64996059
YALI1_A05254g	YALI0A05181g	49.31856891	72.80262042	67.23272027	41.25787238	52.09972421	41.63023383	60.96303545	34.2809595	21.8142669	21.81315086	23.69802855	26.08659096	15.66990231	19.50818906	27.98370488	20.38156084
YALI1_A05259g	YALI0A05203g	1.188994248	0.677520672	0.978005865	0.836780278	1.229905321	1.365456707	1.200771412	1.042855881	1.055372158	1.046824657	0.961718412	1.318026086	1.683395338	1.125102295	1.256874604	0.942928099
YALI1_A05284g	YALI0A05225g	1.453099204	1.47309597	1.451369045	1.363533096	0.700072872	1.309333458	2.007259673	1.714121701	0.522060428	1.279350239	0.555021571	0.488990488	0.499634608	2.166807773	1.088040702	2.016657463
YALI1_A05335g	YALI0A05247g	30.71223974	25.69832682	29.1173843	28.31831629	27.35010063	30.43341938	28.58023181	32.33924443	25.95465411	26.58769665	24.00032327	28.19397514	34.08445209	25.46342329	27.83687747	29.18599703
YALI1_A05355g	YALI0A05291g	10.19507984	5.896605717	7.33171744	7.749007281	7.677882535	7.658561575	8.881896472	7.492344329	6.731886349	6.80289413	5.45991458	7.475539112	7.43900416	6.162478433	7.376656899	5.878773717
YALI1_A05366g	YALI0A05313g	9.140929743	6.127888733	6.952436945	6.591354612	6.141642855	7.188893795	7.974719398	6.568872653	6.854368205	6.430431637	5.785539581	5.389058475	6.3611437	5.339739274	5.921939343	5.28405998
YALI1_A05407g	YALI0A05357g	35.21553679	38.17862403	32.78521352	37.47605281	40.11601784	40.28666362	37.05662362	43.77665162	38.49751176	49.2714877	45.39893161	41.73904724	50.71420173	43.74760297	48.09510441	46.01475387
YALI1_A05459g	YALI0A05379g	32.6091499	35.95825076	34.46775212	33.54663426	37.01986124	35.28225973	40.93854959	30.58642113	68.00854449	67.43728648	69.40365505	71.53541503	66.9883153	59.8948253	66.71288848	63.85017921
YALI1_A05473g	YALI0A05401g	47.95325821	68.47301378	66.52757111	50.41331052	49.97944023	48.05280403	60.85860959	46.41465295	74.64827457	83.62582053	89.64049606	76.5620458	72.46225089	79.48204841	70.67620484	78.29786782
YALI1_A05491g	YALI0A05423g	103.6505287	122.8972806	119.6821244	106.9488495	115.7964284	102.065061	116.1053588	106.9836096	113.5104944	113.4644246	119.3065118	96.31819616	83.25962348	138.3657026	119.3716655	125.8361015
YALI1_A05500r	YALI0A05445r	0	0	0	0	0	0	0	0	0	0	0	0	0	0	0	0
YALI1_A05505r	YALI0A05489r	0.176372548	0.357599384	0	0	0	0	0	0.599197325	0	0	0	0	0.363864334	0.28690933	0	0.629422593
YALI1_A05527g	YALI0A05533g	15.80446606	26.3983419	22.2321656	15.10587381	16.34493927	15.73225114	11.58809607	19.58620094	10.58319044	10.09756329	8.638904358	10.11493479	9.968853057	10.0145423	9.081756513	8.988999659
YALI1_A05571g	YALI0A05555g	32.39343677	50.81689171	39.80002886	34.82038819	39.56798481	31.27911773	46.63979887	28.30361499	21.93295674	18.38454258	23.47013348	23.51997487	14.23776616	19.15969006	25.65397825	18.4189229
YALI1_A05583g	NA	18.52499665	18.82562091	15.80178048	14.65514009	13.48515369	14.49904953	22.81465682	18.83476925	20.25811985	18.57190098	19.72947512	18.15580934	26.87340253	18.69692465	16.46296251	20.79017793
YALI1_A05592g	NA	22.38898069	15.78494251	19.44834521	10.51986443	14.92428076	18.25395999	22.93837266	17.98560374	14.83917216	12.38126732	11.71936456	12.26106605	18.12411923	10.47827649	14.44720226	12.69271985
YALI1_A05605g	YALI0A05577g	73.81984068	62.77269025	74.46222837	76.89190382	77.83805099	79.86755039	77.78535626	78.78328369	80.91588589	77.8774388	84.40369572	82.97278373	107.1331045	74.86891601	84.89150219	87.28595815
YALI1_A05637r	YALI0A05599r	0	0.456932546	0.810347717	0	0	0	0	0	0	0	0	0	0	0	0	0
YALI1_A05639r	YALI0A05621r	0.586491847	0.594562831	0	0	0.847678597	1.585397741	0	0.332085264	0	0	0	0.592090892	0	0	0	0
YALI1_A05662g	YALI0A05665g	0.705962409	0.506479449	0.76153159	0.343963544	0.706398831	0.440388261	1.138080535	0.507352487	0.351185227	0.917980895	0.22401473	0.049340908	0.268879668	0.141342213	0.234212778	0.116278873
YALI1_A05684r	YALI0A05687r	0	0.176877115	0	1.473495442	0	0.471641622	0.619752987	0	0	0	0	0	0	0	0	0
YALI1_A05694r	YALI0A05731r	0	0.406162263	0	0	0	0	0	0	0.647741642	0	0	0	0	0.325872325	0.269995285	0
YALI1_A05701g	YALI0A05775g	21.35283651	23.88763886	26.8894512	26.61260899	28.65276511	30.25888597	31.3244716	26.32473581	32.08855768	37.26802871	31.36595816	27.0645605	32.69927481	28.88220585	29.1594908	29.24716983
YALI1_A05718r	YALI0A05819r	1.783107081	1.084587143	0.961731356	1.505879957	1.546314804	5.30208109	1.266747863	1.817345733	0	0	0	0	0	0.870186538	0	0.636339325
YALI1_A05723r	YALI0A05863r	0.438547958	0	1.182669641	0.925912676	0	1.18547759	2.33663626	1.676133058	0	1.158330622	0	0	0	0.535047128	0	0
YALI1_A05737g	YALI0A05885g	2.549440689	1.51358906	2.152486123	3.538883259	3.389610642	2.931793103	2.32649461	2.584038464	3.552458067	4.613212582	1.839954322	1.514406089	1.97598548	2.474592968	2.44894161	2.312253832
YALI1_A05745r	YALI0A05907r	0	0.444583018	0	0	0	0	0	0	0	0	0	0	0	0	0	0.391262693
YALI1_A05774g	YALI0A05929g	35.25795361	33.1591222	35.19423964	32.32268917	34.11723665	36.51021165	38.78353639	38.16324495	38.06878141	35.83835003	29.70641316	35.91621085	35.19097873	28.8986949	32.60542201	32.30222069
YALI1_A05795g	YALI0A05951g	3.199377029	3.023098365	3.125626909	3.390190685	3.638269337	5.254382444	4.288469327	4.111902476	11.20390621	9.757901268	4.067267449	4.186708182	4.65768006	3.93774516	5.369772302	4.480889413
YALI1_A05798g	NA	4.604753558	2.667498108	2.890970234	2.777738029	4.436948335	5.334649156	5.452151274	2.359002081	4.490425165	4.247212281	5.695221344	6.08760118	4.372928121	3.566980855	5.122613249	4.369100072
YALI1_A05813g	YALI0A05973g	9.322412416	9.896490272	7.9848897	6.963164437	5.910777863	6.894403546	9.918567106	12.77313322	16.35152681	14.86681254	13.10091567	12.1194106	17.32743652	11.5883378	16.1206941	18.63534371
YALI1_A05821g	YALI0A05995g	77.14099469	74.25313645	77.82738144	59.45373786	65.10922486	68.24786197	68.41877945	63.54285105	64.63600949	57.6438239	46.67809036	51.17687253	41.27866994	51.00699477	57.0700174	50.39855661
YALI1_A05836g	NA	0.464555914	0.639144911	0.417602504	0.560470659	0.647460033	0.717589707	0.884003493	0.760943842	0.643767767	0.788801835	0.456275402	0.602988271	0.20537128	0.56677794	0.760293472	0.503280642
YALI1_A05844g	YALI0A06017g	0.065560705	0.299083121	0.294671897	0.415257806	0.639612033	0.177222912	0.11643844	0.334097902	0	0.259746867	0.075124132	0.248199718	0.541018484	0.133311406	0.088362093	0.292458983
YALI1_A05869g	NA	7.389430145	16.37234363	9.587212427	7.398607396	8.918533976	6.177840963	7.576698484	8.346565554	14.28680861	15.6945642	16.93467225	20.18807562	11.94431654	15.36648654	14.78509393	17.26331826
YALI1_A05884g	YALI0A06061g	15.01332639	25.28290382	21.47328733	12.33420212	14.06073134	12.68036022	13.95862419	14.09690549	37.9395768	36.35267362	37.29990503	36.73583005	37.22906659	31.64056222	31.12792325	32.40974229
YALI1_A05904g	NA	0	0	0	0	0	0	0	0	0	0	0	0	0	0	0.220905233	0.073114746
YALI1_A05927g	YALI0A06105g	0	0.070297315	0	0	0.601344646	0.124964874	0.082104028	0.039263642	0	0	0	0	0	0	0	0.041244216
YALI1_A05933r	YALI0A06127r	0.845118461	0.34269941	0	0	0	0	0	0.287115385	0	0	0.774717609	0	0	0	0.455617044	0
YALI1_A05947g	YALI0A06171g	0.040975441	0.027692882	0.049111983	0.201861434	0.118446673	0.221528641	0	0.116006216	0.132492609	0.072151907	0.18781033	0.165466478	0.056356092	0.177748541	0.036817539	0.060928955
YALI1_A05953r	YALI0A06193r	0	0	0	0	0	0	0	0	0	0	0	0	0	0	0	0
YALI1_A05987g	YALI0A06215g	0.490590308	0.161636003	0.33075417	0.207158089	0.42544111	0.69623287	0.47921943	0.604179313	0.475891818	0.583105211	0.393507357	0.260018752	0.506054705	0.518735538	0.495909708	0.612771202
YALI1_A06019r	YALI0A06226r	0	0	0	0	0.295619007	0	0	0.231622495	0	0	0	0	0	0	0	0
YALI1_A06020r	YALI0A06237r	0	0	0	0	0	0	0	0	0	0	0	0	0	0	0.61604558	0
YALI1_A06024r	YALI0A06259r	0	0	0	0	0.39087402	0	0	0	0	0	0	0	0	0	0	0
YALI1_A06032r	YALI0A06303r	5.834166091	6.838585975	4.916716485	5.389019847	3.162126903	9.363940966	8.742695221	8.052134838	0	0.48155318	0	0	0	0	0	0.325319543
YALI1_A06052g	YALI0A06347g	22.6611314	18.23028629	21.66833317	22.28839529	22.66063852	24.44650465	26.16214497	25.70190455	28.51104609	20.71710942	15.98259865	19.67321941	26.08435382	19.77552537	21.16641495	18.88335242
YALI1_A06073g	YALI0A06369g	60.65303187	52.93260763	53.512239	66.31617138	64.17633382	63.59206495	58.07104152	65.5038184	63.26601873	63.34068173	62.35076663	56.52000978	66.34605819	59.84075955	67.58502461	68.0522102
YALI1_A06081r	YALI0A06391r	0.386339868	0	0	0	0	0	0	0	1.249216023	1.02043412	0	0	0	1.571170139	0.520705193	0
YALI1_A06099g	YALI0A06435g	816.3214071	611.3176624	686.6666799	633.4968985	543.9525424	607.7891699	707.3357696	573.6370735	252.7756864	204.6964901	213.4018743	304.6136203	313.0291973	163.3510974	293.4019315	210.249816
YALI1_A06102g	NA	1.024817333	0.86576693	1.433035963	0.961649657	0.123433901	0.307808216	0.606705555	0.483562753	1.288664951	2.40607624	2.609575105	1.896768368	3.523738813	1.342937003	2.148594059	2.438184361
YALI1_A06104g	NA	2.73861172	2.915113967	3.200360604	3.75834597	1.335898549	2.776118408	2.796733414	2.325998055	11.29038279	9.584330591	10.51262376	13.58186556	16.94962973	8.408743476	9.87362505	11.85014182
YALI1_A06116g	YALI0A06457g	5.443208836	4.156048893	5.20274203	5.164273039	4.48135819	4.470081105	3.242847634	3.335658993	1.113950594	0.636958877	0.947425357	1.095556715	2.416491797	1.09281388	1.160807755	1.352389945
YALI1_A06128g	YALI0A06479g	35.83433553	44.20622755	43.48498934	35.01268369	38.9128369	37.33295285	50.34379867	28.09828232	17.14943162	18.75221069	22.31186715	22.75870925	15.73024375	19.47640809	24.81387737	19.11489195
YALI1_A06149g	YALI0A06501g	58.60446992	69.9398455	77.53475922	67.1204606	70.66919116	63.61642685	79.09762319	51.55859251	46.88546948	51.90101623	63.03234336	64.04344839	31.10136846	61.12186131	60.91696815	52.7476221
YALI1_A06169g	YALI0A06523g	41.09194365	39.87909672	38.76528268	39.28956124	38.31621812	36.9473849	45.43459395	38.07925991	33.65455492	35.79241622	32.86477729	38.73928024	28.19784685	34.67105391	37.6906121	33.49208652
YALI1_A06174g	NA	41.6058319	35.11350875	31.32305599	37.77248893	43.86057512	40.20744827	47.93848943	37.63420121	48.4311443	36.40202484	32.06139029	31.10849344	38.73289185	30.83723545	40.23448971	40.2285767
YALI1_A06190r	YALI0A06545r	1.172983695	1.189125663	0.702952236	0	0	0.528465914	0.347211011	0.166042632	3.792800457	5.163642533	2.688176765	1.184181785	1.613278011	1.431089909	0.526978749	2.441856325
YALI1_A06196g	NA	5.62729383	4.264703766	4.420078457	3.691180502	5.803886963	2.362972166	5.918954028	5.753908319	4.946390719	3.318987742	3.505792818	3.474796046	4.170350817	3.332785143	3.239943422	3.850709938
YALI1_A06207g	NA	2.498983195	2.116928	1.969452679	3.541518317	1.335898549	2.405969287	3.587114596	2.587672836	4.095531014	3.707146738	3.45190631	2.125406442	1.977456802	2.645134537	3.045136698	2.626577825
YALI1_A06220g	NA	1.186615308	1.007116633	0.942649385	1.747896379	2.15379562	1.044349306	2.156487433	0.937519624	0	1.676427482	1.138360569	1.086506927	1.024760777	0.942702083	0.669478105	0.837089231
YALI1_A06229g	YALI0A06589g	6.095584579	7.441472898	5.575964053	5.233978602	7.259088942	5.540853261	7.433346833	7.957197809	20.47326261	17.0922715	12.32169912	9.961968425	13.01825728	12.72647812	12.98870176	14.58203969
YALI1_A06287g	YALI0A06611g	16.17735802	19.09907202	20.27753822	15.86054122	18.8922443	19.32451002	24.79732589	14.28603062	12.54057946	12.1265543	13.24426797	12.05307853	12.25417352	9.628390442	15.70053978	12.95547951
YALI1_A06311g	YALI0A06633g	127.4293068	139.3097696	155.9124517	250.8484986	243.4453166	208.0503717	243.5095479	186.4134415	57.73888415	90.4329223	32.91623144	23.9839306	39.72214662	38.0147998	34.53097595	40.03609547
YALI1_A06327r	YALI0A06644r	0	1.382316947	0	0.287888815	0	0	0	0	0.881799546	0	0	0	0	0	0	0.486612425
YALI1_A06361g	YALI0A06655g	105.9733162	94.21546652	100.9392095	106.5910143	106.455442	116.5902142	96.07203104	128.731313	131.2334307	119.1222567	115.8331807	121.1521206	134.5492922	115.8365858	132.1494968	126.6414934
YALI1_A06381g	YALI0A06677g	18.48487674	13.40670218	18.27289577	18.88624447	18.00812449	19.80246953	19.97766942	20.98781912	15.18277936	14.7177998	11.6803578	14.96357912	17.81069265	11.90463528	14.21925719	14.05249343
YALI1_A06384g	NA	4.482934681	3.754256597	5.781940468	6.892905481	3.16924881	5.663948487	5.36560919	3.931670135	4.88432211	2.187957842	0.893368054	1.770938525	3.820029163	1.347526101	1.838886807	2.347576158
YALI1_A06396g	YALI0A06699g	6.574717987	5.45035708	8.035543829	6.838077651	8.566460557	10.24337822	8.743341535	8.472482734	16.65122676	16.08253055	18.77878373	17.46018133	25.52424781	10.01032951	13.61940289	10.7780767
YALI1_A06402g	YALI0A06721g	7.876504052	4.420822386	4.558205908	5.709794838	3.664443937	6.488020062	4.382815652	6.747211544	4.26294968	5.535855098	2.711511633	4.197677723	6.346400424	4.784213072	4.328361916	4.403335558
YALI1_A06416g	YALI0A06743g	74.94318603	78.00975909	107.2206805	152.0949717	109.8885127	127.1825914	104.6611239	147.6851328	107.8362548	135.7489302	108.149225	134.7334283	115.3370492	130.5182698	133.6688885	124.8538048
YALI1_A06423r	YALI0A06754r	1.090841979	0.138231695	0.980588834	0	0	0	0.484344771	0.115811248	1.763599092	0	0	0.206485479	0	0	0.367556607	0
YALI1_A06434g	YALI0A06765g	389.2069161	355.5416192	401.2866266	349.0273085	342.8376601	336.8850997	374.5323401	303.1420361	213.0899543	205.3757933	182.2508614	196.297051	168.3004776	185.2161514	213.7357789	183.8797372
YALI1_A06453g	YALI0A06787g	132.1229059	97.41171637	112.8674655	129.2645048	124.3788088	137.6380361	151.9983379	126.2093228	80.24848864	78.58984798	91.21364845	88.70315561	98.55397925	88.23835974	88.88617196	90.21048592
YALI1_A06473g	YALI0A06809g	160.5725075	135.6661288	171.7683926	160.8556265	169.0224766	169.6251724	192.4236187	150.1254569	92.91044175	87.50222575	90.73879999	98.67102209	79.59153279	90.66633682	110.5440852	96.58686386
YALI1_A06488g	YALI0A06831g	49.3000996	53.81306948	55.94684441	46.14131505	48.41027558	53.44528136	61.20688871	51.30829526	53.53059474	50.77349227	50.08444653	46.92987092	46.74509371	50.19039312	49.20664073	51.02717621
YALI1_A06530g	NA	348.5596819	319.1475952	232.9973011	211.1375229	218.4175298	177.9962277	149.2948616	338.6946715	1379.383677	1245.838464	1408.193964	1306.875744	1987.707769	1346.236308	1051.801712	1196.379078
YALI1_A06591g	YALI0A06886g	57.45743602	63.61649357	52.13378402	59.34001442	60.07385788	56.95257784	53.41232415	68.15006852	70.50549075	66.60603229	72.58820071	66.48958559	71.09896384	69.69743639	77.00166583	79.47036934
YALI1_A06594g	YALI0A06908g	118.6108845	112.3086442	100.2733799	99.75347453	117.4691393	104.4103576	95.77917847	158.4606698	186.9268071	171.0127533	165.2244803	192.0452614	170.9876986	164.9728646	182.0752911	172.8406782
YALI1_A06612g	YALI0A06930g	21.00067207	18.00652701	13.8959627	14.30973274	18.49413187	16.01980262	14.32031091	21.33869897	18.94644302	20.23861004	20.73565157	17.5946022	21.86929464	22.14574009	19.79965425	20.41932369
YALI1_A06615g	NA	10.68229734	11.24054064	9.481068289	10.56312045	11.13990957	10.60014545	12.72817696	12.00142309	13.33538105	20.17908471	17.50861797	10.5453855	13.9481328	17.5421146	12.57503041	16.16567027
YALI1_A06625g	YALI0A06952g	8.836090042	5.971791695	5.199062581	4.635675017	6.03726209	4.053316117	3.804424274	7.823183556	4.675283731	3.253265213	3.681826262	1.865184016	3.645848573	3.092560629	4.691502233	3.631124399
YALI1_A06634g	NA	4.270072221	3.380613726	3.253576548	3.133947543	3.747100567	3.792636952	2.780733795	4.265714289	4.076389129	1.879747062	2.05038044	1.601168103	2.181362122	2.017713231	1.39768236	1.469441467
YALI1_A06640g	YALI0A06974g	17.00931181	10.54007407	20.12616957	16.07314901	17.2906738	18.89348288	15.2977634	22.09479895	16.41061264	13.5966691	9.736933384	10.0131618	21.68878559	14.89620933	12.29310973	12.22564795
YALI1_A06666g	YALI0A06996g	22.47508494	21.6040696	24.8006146	20.69217203	23.06902254	25.13836994	24.44731332	24.82179	21.0154216	16.81630941	17.69818103	17.27388879	14.3509944	15.25961537	18.51270124	17.72444875
YALI1_A06672g	YALI0A07018g	63.55642041	46.69019837	67.65666758	77.46535508	71.09846134	77.95276393	72.97363369	79.23290849	49.5598066	53.27284549	59.17635183	61.89391813	78.95005454	52.82559674	63.6207072	58.62549207
YALI1_A06710r	YALI0A07040r	0	0	0	0	0.97718505	0	0.800514274	0.57423077	0	0	0	0	0	0	0	0
YALI1_A06721g	YALI0A07062g	59.42956483	66.3059895	65.75821659	60.97496957	55.26524338	61.10088098	64.93060225	64.12952522	63.69459478	67.28566213	62.70430428	64.4882618	55.82697103	61.6577595	57.57649457	59.87285284
YALI1_A06735g	NA	15.1905548	16.74123074	15.93109129	16.15750454	17.83882495	12.28776949	17.47505629	16.37168577	12.65163462	16.10983227	15.03281829	14.89990432	14.48231661	14.36784948	12.40829396	18.48091869
YALI1_A06743g	YALI0A07084g	259.2270268	270.5372989	267.7978201	261.2663699	295.4296911	264.6824198	311.0652922	241.2743685	198.2089424	201.8233155	225.7480161	196.7230961	164.3343646	226.5494029	223.5560961	210.0440413
YALI1_A06751g	NA	40.94055053	29.34321283	38.41529573	37.42459587	48.58834971	39.37507085	43.51310263	39.04769234	40.34596702	32.10831319	34.30234801	26.68024092	46.56742951	23.60799804	36.77415981	33.68345659
YALI1_A06761g	NA	22.13895416	12.32866448	17.0324017	18.7252899	16.0962407	18.2534096	20.46532145	17.11992357	12.7094152	9.494473982	9.700811803	8.546703317	11.71296618	6.557927535	9.010463772	10.61026657
YALI1_A06778g	YALI0A07106g	45.69106968	41.44242885	44.50082634	37.0941569	38.9048754	44.32894069	41.07239981	47.84297183	39.87816254	37.43993705	36.56525937	33.41537108	45.48552828	30.9853362	41.9043138	38.0604721
YALI1_A06815g	NA	9.89233398	8.946258276	8.444676209	10.29265648	12.65197486	13.46660947	8.27900289	17.4384818	20.59562733	23.02690151	15.08660608	16.05786857	24.22570434	21.27281675	20.28694837	23.52466942
YALI1_A06818g	NA	13.32401397	15.1790763	13.04462179	11.1410631	14.44327171	13.01615842	10.07476501	19.49583491	30.92571375	28.74637581	18.44205821	23.47303426	24.76644068	25.05441553	22.75862697	26.95259185
YALI1_A06823g	YALI0A07128g	3.768557121	2.989031675	2.966399224	4.576081062	4.741287751	5.858912711	4.005461315	5.398183842	6.029609471	7.83929172	5.168513148	5.943352803	7.190589761	5.820703236	7.553045	7.14254519
YALI1_A06873g	YALI0A07142g	0.227437925	0.09366817	0.178894108	0.210084436	0.323588216	0.403467406	0.315577243	0.211280704	0	0.075091078	0.032576825	0.043051725	0.08797771	0.01156183	0.038317334	0.050728759
YALI1_A06883r	YALI0A07150r	1.298101955	2.631931467	1.750351069	0.34258769	2.462506326	3.070386959	4.61096222	1.515969232	0	0	0.743728905	0.491435441	0	0	0	0
YALI1_A06888r	YALI0A07194r	0	0	0	0	0	0	0.323803527	0.309697494	0	0	0	0	0	0	0	0
YALI1_A06928r	YALI0A07260r	0	0	0	0	0	0	0	0	0	0	0	0	0	0	0	0
YALI1_A06929r	YALI0A07271r	0	0	0	0	0	0	0	0	0	0	0	0	0	0	0.30802279	0
YALI1_A06936r	YALI0A07293r	0	0	0	0	0	0	0	0	0	0	0	0	0	0	0	0.402131101
YALI1_A06939r	YALI0A07315r	0	0	0	0	0	0	0	0	1.279684707	0	0	0	0	0	0	0.353090723
YALI1_A06957r	YALI0A07359r	0	0.382548178	0	0	0	0	1.005296996	0	0	0	0.864801052	0	0	0	0	0
YALI1_A06958g	YALI0A07403g	84.93318047	117.4316644	126.0971513	106.2104591	102.9018344	98.05531851	98.01079115	108.8375363	183.5080234	175.1079738	137.652723	176.4834883	129.2122679	156.3974635	153.9853545	145.9211378
YALI1_A06989g	YALI0A07425g	1.973114972	1.377377468	2.427153482	2.192561218	1.726099672	2.503096416	2.213261866	1.874289232	2.434472187	2.194341531	0.872641915	1.310494509	1.553264069	1.400729602	1.387991762	1.412927837
YALI1_A07014g	YALI0A07447g	4.113192963	3.719752387	2.83418096	5.260280002	5.519376865	4.996083111	4.666314363	4.816997814	4.599291155	5.408129906	4.630138074	4.829292997	5.943726942	4.487704054	4.200529663	4.874071437
YALI1_A07038r	YALI0A07469r	0.78198913	0	1.405904473	0	0	0	0.694422021	0.830213161	3.792800457	0	0.896058922	3.552545355	0.403319503	2.226139859	3.161872497	2.790692943
YALI1_A07044r	YALI0A07513r	0	0	0	0	0	0	0	0	0	0	0	0	0	0	0	0
YALI1_A07051g	YALI0A07557g	3.669341285	3.308387564	3.425053138	2.273425204	2.783406114	2.462937107	3.707128891	3.83406762	14.16798449	10.19496508	10.21251023	10.91242556	12.37175883	9.39141085	10.04729775	11.89027152
YALI1_A07103g	YALI0A07579g	0	0	0	0	0	0	0	0	0	0	0	0	0	0.016663926	0	0
YALI1_A07137g	YALI0A07601g	5.326009413	5.406929213	6.153683637	4.860075718	4.876411626	6.019170407	6.079009649	4.983588321	8.245868216	8.126572696	10.51633361	9.215838469	12.53973997	8.339657465	9.581265232	9.194763982
YALI1_A07161g	NA	2.361570459	2.239613044	3.355524349	1.930071495	1.899317421	2.574100401	1.961823715	1.844008669	8.005539305	7.143038837	7.070662124	4.6720975	6.522225478	4.461238028	6.67382712	6.082940882
YALI1_A07171g	NA	2.433941166	1.879951048	2.431043151	3.344308405	2.764037712	3.7596575	1.989849768	1.542219782	5.246707299	3.061302359	7.791445671	5.733413475	9.325323072	6.473220971	7.133661142	6.79027088
YALI1_A07201g	YALI0A07623g	8.235270469	9.008941043	7.089235512	8.423482278	10.64186041	8.426663645	11.27950436	8.792522753	10.23013896	8.633092099	7.144062599	6.869527666	13.79815288	7.426735408	8.293210018	9.453972469
YALI1_A07226g	NA	0.99944444	0.864198512	0.951277755	1.303322735	1.274589195	1.032997683	1.252978864	0.898795987	1.045539498	0.465850359	0.269466995	0.623197117	0.606440557	0.789000657	0.515045354	1.153941421
YALI1_A07241g	YALI0A07667g	3.892429996	3.074390081	3.625486318	3.696514577	4.948058403	5.02857209	3.914653619	4.315028905	4.09425136	4.417948876	3.761634635	2.438239422	3.28950184	3.877974851	3.750281331	3.849301176
YALI1_A07267g	YALI0A07689g	62.4363408	53.00655214	59.14168436	55.71690568	58.28038378	60.97424594	56.92499685	69.73804947	61.65506496	59.8751994	57.35126666	58.88917538	63.30892422	55.49724349	58.95412006	57.60567244
YALI1_A07277g	YALI0A07711g	0.300486564	0	0	0	0.32572835	0	0	0	0	0	0	0	0.154979253	0	0.202496464	0
YALI1_A07290g	YALI0A07733g	230.3197084	161.8132925	152.4036692	197.0906161	182.7687549	191.2812156	166.6567055	247.1092642	308.1968712	286.5437738	228.7813556	278.0676073	280.0865343	270.8878173	267.3914817	286.3057719
YALI1_A07309g	YALI0A07755g	64.06802805	47.67329567	59.96573106	51.56941687	54.58276493	70.1454617	58.09446448	57.18609284	186.480192	159.5845581	127.7423258	134.9822345	131.2010079	129.1501854	121.9896555	147.8310524
YALI1_A07318g	YALI0A07777g	12.27827579	8.484937211	10.93082176	10.33597898	9.843177875	17.18221412	12.62124695	12.94324538	14.80822498	17.20585997	10.13353252	11.77771068	13.92777056	10.66102015	12.18526167	12.96212367
YALI1_A07326g	YALI0A07799g	192.7608681	231.7223975	210.9083151	139.8180013	145.543091	169.676046	172.6689109	172.0183065	158.8708849	137.4584785	110.1010438	123.2718311	74.92139904	126.9505472	131.278968	121.1259428
YALI1_A07349g	YALI0A07821g	14.94113563	22.14801144	21.61820191	16.58671806	20.44820286	17.61152693	17.64439314	17.65403689	37.83266213	41.88418227	43.05124963	33.86233874	37.07206205	37.60290582	35.8619564	36.32141161
YALI1_A07357g	NA	11.99873934	12.73108612	16.31872644	9.647584382	10.91751573	14.62089028	11.81448653	14.3623696	50.4568403	51.47914196	41.24703409	46.64870898	54.9588497	39.77046988	41.6444452	46.95227271
YALI1_A07372g	NA	6.084852916	5.551730438	6.563816508	4.425091	3.371288422	2.37589467	5.643625634	7.177884621	37.3827895	35.0008903	26.9601728	27.13133162	34.03344403	24.03104727	21.50512447	27.14384933
YALI1_A07376g	NA	4.430578482	5.541522371	4.551740368	3.88751989	3.742410829	4.666241579	5.722825451	3.46981997	6.883977661	6.839079737	5.93400722	3.921027453	7.953403384	6.271308894	7.832735561	6.879008624
YALI1_A07381g	YALI0A07843g	11.19597167	8.072919041	10.44710672	12.1021016	12.46124609	15.23897456	15.19343419	12.49579727	8.005180232	11.45385236	11.88954372	12.01127438	13.0616334	8.990940957	12.78384382	11.50118397
YALI1_A07405g	YALI0A07865g	17.03935573	18.02643693	17.47808801	18.21163321	16.7079483	18.92115213	18.08220479	16.27362495	19.31794191	17.64750771	18.14763341	17.50538008	18.30578475	16.07317321	17.91498128	20.12232491
YALI1_A07418g	YALI0A07887g	4.031246709	2.875081191	6.227840882	3.421599903	5.00670093	5.42122898	6.296179686	3.234618268	0	0.428047271	0.092850051	0.061352739	0.417921582	0.164766906	0.764481032	0.108439848
YALI1_A07421r	YALI0A07909r	0	0	0	0.769859978	0	0	0	0	0.589517674	0	0	0	0	0	0	0.325319543
YALI1_A07425r	YALI0A07953r	0	0.200604533	0	0	0	0	0	0	0	0	0	0	0	0	0	0
YALI1_A07472g	YALI0A07997g	61.5180599	42.52324549	56.62543506	58.69764125	55.35394148	60.61281698	45.09970849	75.99916362	72.18770652	70.69726094	65.14934547	67.85921418	85.51501557	64.71695563	71.71576569	71.44994015
YALI1_A07538g	YALI0A08019g	25.3866393	17.07955526	21.02076461	25.39036428	28.19282825	28.93069779	24.17893753	30.24119151	45.35983118	49.91008413	41.27431689	43.98521462	55.27021814	42.86954438	51.26176441	45.01130419
YALI1_A07557g	NA	5.235677887	4.342686921	5.445536659	4.93326274	5.065727298	4.210816401	2.766577332	6.578387698	12.17236093	8.343069361	6.148158947	12.18759893	11.60484649	9.783990688	11.78043428	10.11440146
YALI1_A07575g	YALI0A08041g	18.98672517	14.74427317	18.30067572	35.24227436	39.64846518	36.23742184	40.96794583	26.60327815	74.22375397	67.87595756	93.07484541	75.33514585	118.1698268	58.4605596	88.35046675	85.7058745
YALI1_A07608g	NA	41.33259957	31.83524069	42.96052375	51.47337436	37.10386219	44.29911532	40.14519346	47.37832381	35.7611393	38.80695726	32.00624392	45.72061066	29.31189699	35.85081952	42.32478329	43.71825285
YALI1_A07624g	YALI0A08063g	69.80755664	59.65160502	72.8424893	76.20881421	79.96854093	84.28709579	70.37946045	70.33409209	51.98792163	46.47867736	56.28907123	46.82474671	66.74722911	46.52385441	49.71426885	51.51685011
YALI1_A07632g	NA	12.76466923	10.49117126	9.075894431	10.12536951	7.973830007	11.01440401	11.1431587	12.3115077	17.48902433	15.61944492	11.81702593	14.96147897	17.33287969	14.28298401	13.21896916	10.84145449
YALI1_A07635g	NA	13.50626312	11.75874969	12.0287453	9.967387521	10.43836978	12.25450341	14.27043943	10.06397511	14.25406029	12.71708648	14.61663744	17.18603709	18.64051042	11.926362	15.29609127	11.54790353
YALI1_A07649g	YALI0A08077g	536.5554043	510.3880819	515.5886761	621.1490836	587.3835501	590.6304762	545.3845177	599.7770361	542.2130744	551.4948643	538.3720518	601.8835583	584.903042	540.4269619	565.8541431	523.9572087
YALI1_A07668g	YALI0A08107g	61.52462392	54.7496577	56.74054715	51.07411483	54.76145019	54.7552341	57.01262662	57.98582313	53.25407908	43.53682171	45.15054227	43.24631878	51.3291287	47.14924469	46.36359037	49.02782385
YALI1_A07681g	NA	35.25586865	37.91425665	32.01861711	27.64376282	25.95498828	28.43941463	32.56726365	29.29977488	29.11282708	26.65573029	21.23859983	26.07005082	26.46743248	23.95459643	23.06978007	25.95216814
YALI1_A07712g	YALI0A08129g	95.25715805	154.3988383	147.3731402	109.9458877	107.9267682	111.7622746	126.1237441	97.97231773	58.63634047	57.32924374	66.34992496	78.69858811	40.98674622	57.11940735	70.28003487	50.23905835
YALI1_A07730g	YALI0A08151g	56.42416499	83.69542065	77.32662055	59.93000662	59.85062993	70.06330622	99.44308522	47.29824004	31.62015599	32.00081399	50.8710571	42.06687373	25.35212618	36.88353324	45.66376259	34.89854548
YALI1_A07766g	NA	6.512586341	4.420122999	5.358217558	4.19495131	4.187935928	4.774168255	5.489240738	6.609513349	1.606134887	3.352854964	1.897267615	2.925210957	4.099043109	3.815698908	5.727757122	5.514940816
YALI1_A07768g	YALI0A08165g	29.94987764	28.71480248	31.81174422	27.38966502	28.87824769	32.53350033	28.53988184	32.09029964	39.74888057	41.25992875	49.46208118	45.71005751	55.78482505	43.99884023	44.89715797	48.53900128
YALI1_A07829g	YALI0A08195g	0.16693698	0.270774842	0	0.211473883	0.072384078	0	0.118594707	0.1134283	0.215913881	1.234599305	0.306061278	0	0.068879668	0.108624108	0.314994499	0.089362467
YALI1_A07842r	YALI0A08206r	0	0	0	0	0	0	0	0	0	0	0	0	0	0	0	0
YALI1_A07887g	YALI0A08217g	0	0	0	0	0	0.083547944	0	0.052501099	0.199874564	0.408173648	0.070831324	0	0.127525786	0.025138722	0.041656415	0.027574704
YALI1_A07937g	YALI0A08239g	56.25337658	61.52325675	65.22612387	63.50937055	68.09654801	62.0458543	70.6419927	59.06790748	76.10689824	72.48973735	106.9898149	92.14414514	82.05757449	87.47290022	87.38580453	92.79004765
YALI1_A07977g	YALI0A08261g	36.54888777	28.90770315	37.44521465	38.17165785	36.82550601	44.30344768	40.64964396	39.59490049	37.24133416	37.90012371	44.15890373	39.7183423	54.5618136	36.75013165	42.45814828	42.05699949
YALI1_A08027r	YALI0A08283r	0	0	0.339215323	0	0	0	0	0	0	0	0	0	0	1.227705039	0.762893655	0.336667899
YALI1_A08047g	YALI0A08327g	0.275021601	0.13940315	0.32963297	0	0.596248505	0.12390585	0.488449388	0	0	0	0	0	0	0	0	0
YALI1_A08049g	YALI0A08338g	0.444555464	0.150224399	0	0	0	0	0.131591388	0.377576397	0	0.195699694	0	0	0	0.18079218	0	0
YALI1_A08065g	NA	2.924352491	1.442944883	1.209705683	1.639175552	1.009913736	1.539041082	2.344089645	1.604549136	2.928783979	3.075949738	1.364096078	1.450008876	0.907629694	2.79953952	2.302065063	2.839930647
YALI1_A08073g	YALI0A08360g	2.11691096	1.612099096	2.604038731	2.908359918	2.788820255	2.245155436	1.960810245	2.271114954	14.18117516	9.122757466	6.476291026	4.156648079	6.561368838	6.376479259	4.245600018	4.635803481
YALI1_A08107g	NA	21.77025154	10.82930135	17.01730206	15.13095632	14.1447536	16.90540439	19.51253544	16.45171155	12.02370423	9.553814444	6.275212635	7.525105186	10.60058093	4.81170855	8.930094058	7.268519653
YALI1_A08115g	NA	41.68568148	19.49578864	23.67197573	15.80286652	18.00389425	18.01766277	30.85618657	27.98069932	23.31869911	9.235444152	9.766137135	12.07905292	12.28562808	8.265307154	11.70797737	11.79584563
YALI1_A08126g	YALI0A08404g	1.799728375	1.057819063	1.290819372	1.515874736	0.871683655	1.604416278	1.938236331	1.365957796	2.476322029	1.238969568	1.623479025	1.594628274	2.705690894	1.097872515	2.748217496	1.87898426
YALI1_A08175g	YALI0A08426g	14.6888362	41.16736544	35.96040717	15.2828805	17.83522089	17.23711669	18.08431129	14.96318017	23.91090279	26.84131649	31.45656738	34.09819997	31.62443381	24.06277085	28.09963978	27.07807672
YALI1_A08197g	NA	3.085765866	3.163379167	3.864735266	3.074504913	2.630882827	2.717986014	3.817837308	2.65029586	2.354291737	3.846251681	2.224830057	1.680121165	1.85975104	3.919868064	3.364556631	2.443719769
YALI1_A08206g	YALI0A08448g	28.64517532	40.43645966	39.80741353	28.29022216	34.18671564	35.02829605	44.5482566	30.00572626	45.06990258	41.86554484	42.50414437	50.28181347	52.32024678	41.02890094	44.39994974	41.98686059
YALI1_A08299g	NA	0	0	0	0	0	0	0	0	0	0	0	0	0	0	0	0
YALI1_A08341t	YALI0A07249g	0.04538818	0	0.027200483	0	0	0	0	0.051399677	0	0	0	0.126009087	0	0	0.030586878	0.006749053
YALI1_A08362t	NA	0.020786926	0.016858388	0.007474383	0.035110191	0.009013236	0	0	0	0.013442755	0.109808437	0	0.012591223	0.017153737	0.020288746	0.011206568	0.037091262
YALI1_A08424g	NA	11.66143601	7.9525707	10.20693295	10.6299372	11.08169429	12.44331088	16.94705751	14.48201856	4.8063808	4.407406942	3.736226768	4.02268372	4.115193791	5.6784986	6.217072285	5.869402881
YALI1_A08434r	YALI0A08492r	0.160656183	0	0	0	0	0	0	0	0	0	0	0	0	0.261343152	0	0
YALI1_A08436g	YALI0A08536g	27.80893213	25.43665473	30.3267692	36.20845507	37.40950376	36.75430304	36.58154986	39.13359353	31.22430685	35.61066191	37.85156866	42.79084203	46.30326492	36.72501622	39.140097	38.22795561
YALI1_A08467g	YALI0A08558g	6.054319603	6.473702399	5.865871861	5.341420978	4.728314757	8.914026654	7.83987528	6.298014894	28.94151445	29.63209014	26.03051167	28.69348864	21.77708476	27.33227846	24.71502003	26.6184845
YALI1_A08468g	YALI0A08580g	21.34141429	34.19944281	30.36720188	19.67432164	26.56826553	25.02260936	26.81494101	21.74858024	21.98620201	20.89849077	23.7639093	18.06610287	20.08531123	20.22410203	22.84854386	21.13601068
YALI1_A08483r	YALI0A08602r	1.97346581	6.89103678	5.124901778	0.925912676	2.852323929	0	5.841590651	3.910977134	2.836057999	3.474991866	3.517636712	3.984611682	6.333206244	4.993773198	4.137495316	4.108258277
YALI1_A08486g	YALI0A08624g	0.569342963	0.164907987	0.292456319	0	0.176334144	0.659589035	0.144453704	0.276321573	0.525985694	1.50379765	0.745592887	0.369500331	0.335594173	1.025395248	0.657732875	0.507955075
YALI1_A08502g	YALI0A08646g	100.7697833	104.0597789	104.4477933	93.02404042	98.4937923	95.94204035	97.14670747	109.9612376	129.7463981	115.8234892	110.5007684	138.7887693	117.7329997	114.3933053	123.2450379	110.2703301
YALI1_A08512g	YALI0A08668g	22.34808431	22.53221071	23.51311189	24.78528306	26.84588124	26.79713009	29.18917	27.60739057	25.98047987	23.24358618	20.24728208	19.75222833	22.17349471	21.28910278	22.38530041	22.66933269
YALI1_A08532g	NA	1.260293161	0.745288037	1.132913313	3.215224278	1.935395633	3.406809386	2.238331175	3.746437643	3.73551976	3.190095014	3.851023456	3.816974297	5.30841559	4.057585018	5.662037049	5.340925693
YALI1_A08542r	YALI0A08690r	0.18867761	0.191274089	0	0	0	0.510031056	0.335098999	0	0	0	0.864801052	0	0	0.30692626	0	0.168333949
YALI1_A08546g	YALI0A08734g	101.272672	89.55063775	75.93084444	93.64572203	103.0549365	106.2212563	73.21228989	147.7704233	136.8740122	135.3200186	119.3168644	137.4888239	112.504583	132.3114217	127.434768	140.0813391
YALI1_A08573r	NA	0	0	0	0	0	0	0	0	0	0	0	0	0	0	0	0
YALI1_A08574r	YALI0A08756r	0	0	0	0	0	0	0	0	0	0	0	0	0	0	0	0
YALI1_A08614g	YALI0A08800g	0.116630903	0.059117957	0.157264247	0.246244521	0.126428254	0.078818816	0	0.160970351	0.282841364	0.385069479	0.400932024	0.264924766	0.180461017	0.071147327	0.07859701	0.078041615
YALI1_A08620r	YALI0A08822r	0	0.34269941	0	0	0	0	0	0	0	0	0	0.511911917	0	0.137477387	0	0.301598326
YALI1_A08623g	YALI0A08866g	1.368480977	0.726687905	1.288745767	2.201366685	0.565119065	1.056931827	0.694422021	1.051603337	2.528533638	2.581821266	1.792117843	3.256499908	2.823236519	1.855116549	1.053957499	1.279067599
YALI1_A08653g	YALI0A08888g	0.109267841	0.16615729	0	0	0.118446673	0	0.679224233	0.046402486	0	0	0	0	0	0	0	0
YALI1_A08661r	NA	0	0	0	0.557053155	0	0	0	0	0	0	0	0	0	0	0	0
YALI1_A08662r	YALI0A08976r	0	0	0	0	0	0	0	0	0	0	0	0	0	0	0	0
YALI1_A08672g	YALI0A08998g	0.619753538	0.371257694	0.236351417	0.594770296	0.264654284	0.482286311	0.46696666	0.638034189	0.394717563	0.248022182	0.129119602	0.056879102	0.154979253	0.267317142	0.265776609	0.192687819
YALI1_A08729g	YALI0A09020g	93.26963177	57.07193767	77.60492788	105.1221918	99.20019022	116.7291077	110.7092625	100.8794372	46.25779148	45.77082095	46.52629661	51.85469308	63.22288536	42.7855206	51.44163658	50.253295
YALI1_A08759g	NA	81.13137221	99.86514652	99.04249875	69.57490747	83.92933817	67.96006408	101.8432049	84.47572657	77.72899702	53.17595578	59.79672214	65.14553142	38.64149383	61.06032691	66.75633427	63.31330782
YALI1_A08781g	YALI0A09042g	84.70625957	67.24556659	83.63623133	84.56867806	82.0080535	89.82748685	92.82529899	75.57172671	59.59779106	58.30926982	54.95507574	59.32026511	62.35354131	54.46228645	61.04095124	56.50891208
YALI1_A08787g	YALI0A09064g	78.96320623	62.27675481	74.27255972	92.26733125	81.24956729	91.31754317	77.94662697	94.38175737	102.4841749	93.35212824	82.84135539	113.1325338	111.7534019	91.17121067	109.7251529	92.54908627
YALI1_A08821g	NA	3.098484567	3.664644945	3.32283285	3.95955622	2.121326339	3.453175091	3.185966358	2.423888676	2.460767242	3.876624092	2.242398708	2.798794805	3.364373741	2.940219898	3.736517665	3.807110526
YALI1_A08828g	YALI0A09086g	46.10149562	48.61271627	49.14296625	52.4994559	57.13581312	56.03039161	50.60969439	60.70659788	130.1699864	116.8773737	109.3963658	95.97833104	122.0695649	109.2142507	113.0664148	119.959216
YALI1_A08835g	NA	25.64560836	26.85644354	23.94660192	20.275598	23.69175182	21.08590979	26.07389351	21.71920462	17.25107842	17.29878793	14.75652589	11.19937909	18.52160219	14.51461938	16.86093006	19.20381177
YALI1_A08856g	YALI0A09108g	68.72208925	71.28147723	68.59483918	56.58355245	71.41373986	71.04084226	58.21397498	83.28243019	46.37480025	46.80513736	42.73277191	42.82227739	54.55269717	42.2885397	48.5115853	48.18327608
YALI1_A08873r	YALI0A09130r	1.352189537	2.513129005	2.431043151	1.42744871	2.93155515	2.436815047	0.400257137	0.382820513	0.728709347	1.785759709	2.065913625	3.071471505	1.39481328	2.749547743	0.607489392	2.613852158
YALI1_A08875g	NA	0.832116638	0.94901375	0.280504979	0.439214988	0.225504242	0.984098384	1.200771412	0.618402367	2.354291737	3.159421024	1.549435219	3.150227184	2.253159914	1.818931584	2.873892122	2.876784031
YALI1_A08890r	YALI0A09152r	0.18231769	0.184826648	0.327781099	0.769859978	1.581063451	2.464194991	1.619017633	1.393638722	0.589517674	0.48155318	0.417825227	0	1.128388271	0.889741292	0.982904184	1.463937941
YALI1_A08901g	YALI0A09196g	2.74474294	2.291482621	2.177053568	6.647223842	1.750182179	5.019111588	3.010889509	2.399770381	2.088241711	2.558700479	1.295050332	0.61123811	3.497442254	2.232468615	1.414452912	1.440469616
YALI1_A08931g	NA	2.670991678	3.046216976	3.241390868	1.97375624	3.329667577	5.415144548	3.795030634	3.175992405	4.318277612	2.46919861	1.989398305	2.831315296	4.546058098	2.172482167	3.239943422	2.740448986
YALI1_A08934g	NA	6.815660555	4.215400832	3.878427224	3.960551333	4.812495159	6.254022432	4.442160135	6.71816808	8.18850272	6.523700209	5.230463397	3.36145629	4.708502633	4.043265582	3.328901407	6.276034527
YALI1_A08941g	NA	6.310217838	2.970061551	2.971274962	3.013502831	1.3029134	3.249086729	3.202057097	4.785256414	5.586771661	5.952532364	2.410232562	2.275164077	2.479668053	3.788265779	3.341191654	3.61917991
YALI1_A08951r	YALI0A09218r	0	0.365546037	0	0	0	0	0	0	0	0	0	0	0	0	0	0
YALI1_A08981g	YALI0A09262g	0.516064998	0.100609001	0.374692889	0.838135022	0.344256018	0.751165005	0.440650059	0.446741002	0.128359812	0.288342852	0.227440032	0.120228854	0.327589174	0.177585469	0.321021917	0.088542628
YALI1_A09010g	YALI0A09284g	49.33664526	46.55154685	49.73782879	46.56569169	51.97568049	55.96442124	50.85429194	61.36509361	87.50420619	79.92481293	56.36594065	61.01436638	62.38962104	68.69410631	67.99776529	67.37869626
YALI1_A09021g	NA	5.13832024	4.142855087	6.968990367	4.440951541	5.146507929	5.117311598	3.789100899	4.517282055	4.760901067	4.206456204	3.512053162	2.548183767	3.161576768	1.197580795	2.348958981	2.493212827
YALI1_A09064g	YALI0A09383g	329.2918274	302.667917	257.0944562	274.0701522	283.922801	260.0949945	173.665591	391.2425644	1489.18037	1694.405442	1855.142943	1702.105164	1660.137762	1494.784783	1397.044052	1492.599715
YALI1_A09100g	YALI0A09405g	24.6579413	31.30357288	25.64666308	22.49632793	26.07933126	29.34308003	31.01484403	28.11476286	30.81784195	28.07725658	34.12335853	27.20108406	35.17635339	28.64101649	33.97451064	33.95732467
YALI1_A09121g	YALI0A09427g	17.30334316	18.72830021	18.29070561	18.76075447	21.82802969	20.82369222	21.00050434	19.95638363	17.11047402	17.37830228	16.63462919	19.73187754	16.3754702	15.63552344	18.50870277	15.90767966
YALI1_A09139g	YALI0A09438g	183.5597296	194.2534488	201.9791685	121.4520944	142.7911654	149.7118244	205.7321685	130.9724681	168.8783912	162.9505735	141.7733225	126.356925	96.82328852	130.4660404	131.825198	130.0894112
YALI1_A09149g	YALI0A09443g	0.973576466	0.712814772	1.555867617	2.969093316	2.110719708	2.193133542	1.248802268	0.964707693	0.699560973	0	0.99163854	0.163811814	0.223170125	0.263956583	0.72898727	0.386045857
YALI1_A09165g	NA	1.622627444	0.639705565	1.40460271	1.015074638	0.91203938	0.487363009	1.067352366	0.765641026	0	0.158734196	0.206591362	0.045503282	0.247966805	0.415487214	0.161997171	0.214469921
YALI1_A09166g	YALI0A09449g	18.73666852	13.09487702	15.59150038	13.05784305	13.35898549	16.03979524	18.56382469	16.47581955	10.62624263	8.619869651	6.537701344	8.570744677	7.815662598	7.016567404	8.704784701	8.286954844
YALI1_A09190g	YALI0A09471g	0.220123878	0.286911134	0.734966534	0.863108522	0.204527103	0.340020704	0	0.694418605	0.610082244	0.664468729	0.144133509	0.857154838	0.129750073	0.434812201	0.339063847	0.645280139
YALI1_A09218g	YALI0A09537g	7.788314751	8.911595908	9.964440425	7.916119131	7.541159026	9.001330529	8.636983111	8.349007979	7.262086286	6.824372039	6.321100164	6.487262624	7.995525405	6.168649047	8.345578356	7.355935558
YALI1_A09325g	YALI0A09559g	6.375087146	3.523936362	5.404999165	5.525607908	3.811749128	5.768539837	4.528964133	4.058087425	136.961193	120.0314119	167.1698345	142.0447599	174.4104983	100.1899719	127.943597	128.1351339
YALI1_A09372g	YALI0A09592g	136.5131486	142.7486155	133.3726247	120.3568041	138.332345	138.5849171	117.7894412	156.3877966	168.6526229	151.2776306	152.4392428	157.858382	153.5239177	145.2456353	155.4898581	154.2549487
YALI1_A09397g	YALI0A09614g	1.591875308	0.935259928	1.496026555	1.222163444	1.176543873	0.880187375	1.285106527	1.229122718	1.637768165	2.197858104	1.575345507	0.986158075	0.783707796	1.515469793	0.438855213	1.678460248
YALI1_A09408g	YALI0A09636g	74.00523465	96.85635873	93.23139209	66.517026	66.29166316	68.83557832	92.17016178	68.48854582	64.4668415	61.26328929	51.8891152	64.32901876	41.66113826	55.27995841	60.34099009	54.03233073
YALI1_A09422g	YALI0A09658g	174.0560676	160.0300254	156.3720471	151.0446758	149.9424978	158.6441961	148.9946877	181.7410787	166.4462298	148.1137331	139.1616456	156.1137842	175.7752323	132.6963866	149.6803759	154.0949797
YALI1_A09444g	YALI0A09680g	43.69241153	45.78533172	42.03194002	39.29259319	44.57145311	39.07497377	42.10261473	46.65588843	43.2159518	38.79191872	29.88029228	35.13495196	37.77590022	32.52361763	42.14170742	38.13053696
YALI1_A09467g	YALI0A09702g	78.95561114	74.38810078	71.93959421	65.58985289	65.77313537	69.12823194	67.33844437	83.92553504	81.07872044	71.08638933	59.04533303	66.46443909	68.45253616	64.27554666	69.78039619	70.03232741
YALI1_A09522g	YALI0A09724g	11.64711391	21.84423443	22.07809118	10.02527045	11.45406815	12.02424377	15.73240768	11.00019872	12.2829071	13.33463355	14.34673821	14.32320247	14.4126014	11.35998817	13.24829539	12.49000534
YALI1_A09524g	YALI0A09746g	18.71878972	38.02857966	30.24800234	17.62932047	23.07417602	16.50745677	19.3451468	17.57093231	42.23156105	33.5097398	33.07365868	36.19712655	27.61344632	35.35639641	36.18061243	30.5100758
YALI1_A09553g	YALI0A09768g	603.2806375	622.7731966	585.13221	416.5995592	344.3378866	364.87857	416.9017925	360.3713404	5.05971773	4.357702938	2.494688151	5.563420084	2.386095674	2.836011508	5.914425021	2.549359434
YALI1_A09576g	YALI0A09790g	113.5411077	87.47063352	100.9363985	95.30385791	95.75897824	95.78804898	97.86128591	102.6039782	112.1789397	89.93820931	78.91899066	84.65051105	88.88530432	72.14116821	78.1112745	79.00443745
YALI1_A09593g	YALI0A09812g	136.600667	142.766479	150.4486617	159.4254506	159.1232773	154.5728182	202.1700548	164.4556804	51.51243192	45.35361777	47.8227429	50.16289706	59.73942642	41.28403912	60.11757465	57.31685215
YALI1_A09626g	YALI0A09834g	52.4683991	48.98782561	49.44669509	41.24144807	42.49821351	39.82718095	49.35654889	47.21615552	48.67964097	39.40045626	38.44967905	41.9093918	44.46818729	36.94084526	38.52334002	41.38108325
YALI1_A09638g	YALI0A09845g	188.7899684	231.0641144	229.337509	217.4854438	241.5074422	241.6553888	235.3511967	224.6339155	260.6650649	256.9086215	302.157277	255.3347622	227.7463661	273.5213022	249.0023934	231.817284
YALI1_A09654g	NA	137.6327796	150.7197669	148.6753663	132.3162374	133.3494177	129.7755055	186.0104077	122.7809791	131.9626381	125.9772304	120.5742316	127.0556918	94.70897445	126.5246432	118.7466041	108.4358146
YALI1_A09694g	YALI0A09856g	105.1745253	84.34745191	97.38832161	100.5956819	119.2421106	113.9106949	114.5113545	111.4665606	72.75082583	70.75556862	66.25042406	74.81013878	79.02913917	63.98625919	68.80321058	70.30787425
YALI1_A09741g	YALI0A09878g	63.44063256	56.37590868	58.09929841	62.58100047	67.81734801	63.33959688	73.83226961	70.99731192	63.32668376	55.13291348	50.34266053	52.27784953	53.73807698	50.91725668	59.52957418	54.57949776
YALI1_A09766g	YALI0A09900g	349.9597529	276.0473391	287.6538118	301.2361311	298.9171874	308.3540701	275.5874262	373.3970352	324.1823645	302.1332413	258.6967065	313.0279379	331.7821596	286.6379737	291.0021329	313.9377674
YALI1_A09776g	NA	9.320449307	9.644540532	6.598545696	8.156849769	9.946347829	7.832619793	8.9200162	11.27953298	10.4621842	11.35232958	7.968523981	13.30970985	18.4314612	11.43026276	14.7099217	14.04586489
YALI1_A09787g	NA	11.66656554	10.71134899	11.70292866	12.2826982	16.56669538	14.1958644	17.81609676	11.08398928	9.761315904	10.79761685	14.26921736	11.1430129	19.39763585	12.37935914	15.469788	15.43061202
YALI1_A09789g	NA	13.36647128	12.28990987	9.053540011	11.68210898	9.030537702	11.25976608	18.43943225	9.610114951	16.28288472	22.82488272	18.94941463	18.16993105	27.83213625	15.22048498	21.19928498	23.85053428
YALI1_A09798g	YALI0A09922g	3080.287765	4746.851128	3664.679919	2720.993521	3003.992932	2507.836414	3303.205949	2709.406007	2885.547974	2772.881592	2755.395636	2737.440722	1704.37184	2535.012063	2466.857648	2268.369654
YALI1_A09856g	YALI0A09988g	52.45868906	44.16897	45.56719749	43.23865229	45.68245785	47.15566414	49.63806659	49.92925457	28.65318915	29.56501017	26.99247763	29.90567021	33.76273896	26.09557899	30.56680213	29.09628122
YALI1_A09893g	YALI0A10010g	124.262355	83.5951566	111.2723179	117.9806751	106.2395586	117.8443757	92.63093746	130.2289759	164.2469228	140.5341869	119.1028718	150.4260482	144.7736481	117.2092923	134.3419398	133.5167172
YALI1_A09911g	YALI0A10032g	45.46280497	44.91635704	41.28592202	39.36531773	43.44752005	41.3480214	44.56130565	46.88657725	58.65483589	54.09052996	44.0389843	46.14502316	49.76090621	46.16537949	48.30660116	52.79675067
YALI1_A09919t	YALI0A10054t	1.682724757	1.797268016	2.593112695	3.045223914	0.6514567	2.030679205	1.814499022	1.837538463	1.846063679	2.301645847	2.2036412	1.547111573	0.92987552	1.466425463	2.267960396	1.688950625
YALI1_A09939g	YALI0A10076g	142.8833823	141.1614215	137.7954504	129.9426404	129.9086457	131.7191416	141.8741038	152.3797311	155.6366313	143.2451555	130.6528244	136.1547966	131.5002439	128.9796817	128.5044376	132.649165
YALI1_A09949g	YALI0A10098g	84.31897889	77.62410204	76.72646535	83.80332111	85.20808573	80.11697871	79.77036913	99.5237329	106.3047592	99.50992034	89.60495584	94.92355404	103.5397444	99.25264002	97.60202603	108.6132153
YALI1_A09996g	YALI0A10120g	13.31184651	12.34161499	12.50925117	9.756542636	10.98621639	11.35603129	13.97402588	13.78153847	20.54535868	16.08917486	14.34105089	18.68727	18.45306372	13.16223631	16.95072341	17.40485873
YALI1_A10015g	YALI0A10142g	44.73471922	44.84125662	43.99388728	36.04791171	38.76230368	39.16814901	51.31962303	40.07397712	35.41781136	33.02101126	32.1994816	30.14834441	29.41788009	29.12712394	33.26268801	34.04969262
YALI1_A10022g	YALI0A10164g	23.7034368	22.72812613	24.49209188	22.83917935	24.2255986	27.24948342	31.30978467	29.20878447	21.29432852	22.22976482	18.74305812	19.31539296	20.79651273	18.6896731	20.0431445	21.59311443
YALI1_A10039g	YALI0A10186g	15.21394003	17.84236071	16.35429029	15.34316527	16.42925025	16.75147456	16.92638204	19.16763885	21.25337315	22.36496919	19.4880836	20.77212636	26.40448669	19.19684242	20.43698269	20.25708542
YALI1_A10072g	YALI0A10208g	0.401640456	0.420739869	0.433255215	0.480527288	0.348303582	0.28952258	0.451775383	0.375239909	0.043289664	0	0	0.040547479	0.11048026	0.10889298	0.198486633	0.119444882
YALI1_A10105g	YALI0A10230g	73.76555195	58.24738915	68.60366657	69.23235207	77.55417959	79.57782267	72.99223591	69.7002185	70.91732613	62.20441759	58.57101681	63.19884777	78.70579974	55.47789766	62.99340379	62.22410895
YALI1_A10143g	YALI0A10252g	25.79651246	33.71453159	32.86099708	22.02701026	27.01579703	23.06571484	34.53252956	21.21683689	14.47367531	13.08530821	13.06334176	15.23379258	13.34692018	11.51017572	17.54911165	12.58393015
YALI1_A10146g	YALI0A10274g	139.611702	125.2954483	134.9564728	125.6154864	123.4816379	117.128679	118.1399851	136.8763112	128.6071347	115.6304077	89.85012185	113.9442394	84.70600869	112.9228624	114.0603287	113.4676221
YALI1_A10199g	YALI0A10296g	8.472772905	5.69329027	7.028290042	6.803707448	7.594291627	11.17163442	14.36234476	10.36117668	16.12248899	14.82274475	14.60264116	16.27041454	18.39351066	13.85887746	17.93166283	16.48526026
YALI1_A10254g	YALI0A10310g	108.8020058	112.2238438	129.3765746	101.3772183	107.5550697	100.9906527	113.7472468	93.73271531	92.2517078	86.47334433	92.67880062	78.92257906	66.61849917	75.00620571	82.62660349	81.23580867
YALI1_A10267g	YALI0A10318g	26.77523273	22.67329243	27.83991025	25.48144787	23.04487643	27.80437427	26.75800444	27.73186772	23.09871138	22.74139276	21.54130393	20.76522145	23.1037592	19.7945594	22.04335886	22.03374939
YALI1_A10309r	YALI0A10340r	0.222277732	1.802692786	0	0	0	0	0.394774163	0	1.437454054	0.587099082	0	0	0	0	1.497919048	0
YALI1_A10318g	YALI0A10362g	231.2595741	210.8759905	256.9434449	275.5009755	257.2838141	292.6597589	213.2433769	341.6768106	466.3119643	470.8157584	424.4793165	499.3452665	499.8773381	437.5251971	456.3667115	460.4372588
YALI1_A10365g	YALI0A10439g	0	0	0	0.059015967	0	0.075560156	0.049644296	0	0	0.073829859	0	0	0	0	0	0
YALI1_A10448g	NA	8.96308493	6.501497374	10.14092286	6.036068829	5.863110299	8.145924584	6.861550923	8.793934073	12.49216023	9.592080723	6.728975806	8.541615994	10.36147008	8.484318749	8.01885997	9.030715586
YALI1_A10468g	YALI0A10483g	11.05674983	6.864532793	8.71435468	9.992140967	10.26044302	10.76884803	8.091351973	9.170023676	9.450799685	11.31896923	8.676837224	8.663124757	12.51040219	8.426306313	9.02822696	7.720917142
YALI1_A10473g	NA	16.29473973	13.18742033	15.63253064	17.92441924	15.4370499	17.76715781	17.2667889	12.7929893	12.39728307	13.74356839	18.20096054	10.57519303	15.81965442	11.02603449	11.71916244	13.86588759
YALI1_A10483r	NA	0	0	0	0	0	0	0	0	0	0	0	0	0	0	0	0
YALI1_A10510g	YALI0A10549g	75.03149496	73.94691709	81.00776011	82.85546732	83.94019578	89.06558995	78.7972884	95.27126504	85.4533161	77.18450298	77.40289714	77.60584668	71.63141089	76.58406979	80.57334299	75.69447761
YALI1_A10529g	YALI0A10571g	52.93822037	57.16226155	63.93643487	58.45402466	60.3167472	56.10766645	70.66539757	53.34603851	43.83186722	66.3409732	66.23835559	61.22466532	46.93546687	75.20013076	66.6112118	63.78804592
YALI1_A10565g	YALI0A10593g	0.764188749	0.826352109	0.625888661	0.573668555	0.791565912	0.826298352	0.88973957	0.850979351	0.109821189	0.560678088	0.15567324	0.128580701	0.350345565	0.193374786	0.263213614	0.219688576
YALI1_A10619g	YALI0A10615g	105.9941032	98.11556834	101.5757206	104.1877171	108.1857306	109.9213499	110.2491045	104.9415693	78.6678585	82.61312332	79.12371808	85.09624923	87.10878841	78.65972089	93.03916182	79.87799656
YALI1_A10672g	YALI0A10637g	46.96165516	37.56083329	38.79262674	42.02571944	44.96677935	45.56641311	43.85028727	52.61346753	33.33520333	34.85735004	32.27836508	32.4214939	39.16755104	32.50024281	41.08679738	40.06775
YALI1_A10708g	YALI0A10659g	584.2172826	1124.307413	812.8188764	824.6978921	1001.643701	658.663869	723.3478686	725.0544713	1297.708693	1650.112694	1875.39957	1689.23499	1166.70837	1571.122433	1538.644319	1393.07769
YALI1_A10784g	YALI0A10681g	39.0893159	40.5504322	42.19596327	53.10691832	52.1398023	49.86767935	35.38599833	70.65382266	53.85013358	52.80746569	56.06425801	49.16443844	73.18499883	57.98740076	65.90640013	65.58840327
YALI1_A10796g	NA	21.07550588	19.15965436	23.91922917	28.48334437	29.787296	32.77096097	24.95396221	31.36488066	23.31869911	31.36368777	35.90415403	27.01953477	47.96875096	31.40173146	39.96861239	40.82324006
YALI1_A10798g	YALI0A10703g	27.87928996	27.9657578	32.75649471	39.86024798	37.68915347	40.33622305	28.53215105	43.84695438	59.71861966	55.71183136	58.85334424	45.39229794	57.03236523	59.38427016	51.93787352	64.72022178
YALI1_A10827g	YALI0A10725g	1025.954544	1584.471609	1463.261248	1537.029435	1598.836762	1408.756869	1683.966805	1151.270212	917.3129186	1148.659862	1453.097278	1431.189016	874.4106133	1378.044836	1399.806644	1153.687043
YALI1_A10857g	YALI0A10747g	3013.182494	1901.877172	2165.523794	2909.575963	2804.256094	2897.910016	2657.327486	3170.493536	2106.241735	1973.294746	2055.338948	1832.887606	2551.988203	1857.985916	1719.977507	1919.146825
YALI1_A10883g	YALI0A10769g	0.753886776	0.435988024	0.691335003	0.56617236	0.921424257	0.724889789	0.763820917	0.906736707	0.588966208	0.761745956	0.498602166	0.467377017	0.824623006	0.563798751	0.354605594	0.672600944
YALI1_A10907g	YALI0A10813g	73.72239407	63.72915816	74.49083165	76.01568373	86.99528187	76.41484165	71.66566281	83.9200349	70.35207522	78.70820152	77.60039329	87.62386632	71.33022479	84.2502931	73.58645084	74.60518286
YALI1_A10921r	YALI0A10835r	0.174476069	0	0	0	0.756530361	0	0	0	0	0.921682431	0	0	0.359951814	0.141912142	0	0
YALI1_A10934g	YALI0A10879g	438.4744181	455.0375378	414.202027	425.1169948	418.8347014	404.8999922	441.1177431	460.4555738	481.8601734	435.6815467	462.2830279	519.8763875	414.2338728	458.9012051	446.6947763	450.9690599
YALI1_A10943r	YALI0A10890r	0	0.552926779	0	0	0.591238013	0	0	0	0	0	0	0.206485479	0	0	0	0
YALI1_A10966g	YALI0A10901g	0.05519141	0.055950924	0.024806563	0	0	0.149192758	0.098022156	0.023437991	0	0.145776303	0	0	0	0	0	0
YALI1_A11010g	NA	0.573656167	1.329258317	0.663011768	0.519072258	0.97718505	0.221528641	0.946062324	0.835244756	0.397477826	0	0.657336153	0.682549223	0.760807244	0.599901326	0.552263083	0.950491694
YALI1_A11043g	YALI0A10945g	0.736460373	0.257024557	0.998464151	0.73921451	0.366444394	1.142257053	0.814809172	0.687026099	0.273266005	0.095665699	0.055336972	0.036565137	0.04981476	0.019639627	0.260352596	0.043085475
YALI1_A11068g	NA	3.755125083	3.771876306	5.016929815	2.982185839	2.091300489	2.514420621	4.038263091	2.135992162	2.116506129	1.819882506	2.84227607	1.252064817	2.842931526	1.933439941	1.857292408	1.567542891
YALI1_A11079g	YALI0A10967g	23.41513021	26.96480419	26.03370261	16.76800509	22.78449192	20.08058981	45.23412305	23.5507303	20.80972515	15.55193266	12.23857692	10.9380673	17.09087665	18.1818195	20.8084341	17.59196311
YALI1_A11114g	YALI0A10989g	18.26681088	15.15781508	18.19878102	16.59320938	18.25581296	19.26970712	21.82357531	19.41978458	11.00627231	12.1443428	11.82369676	10.67340565	14.35715548	10.60319828	15.18022915	13.14909077
YALI1_A11141g	YALI0A11011g	0.668498198	0.677697709	2.23983751	0.962324973	0.658776438	1.232097495	1.079345089	1.135557477	0.786023565	0.321035453	0.278550152	1.012320196	0.438817661	0.494300718	0.655269456	0.650639085
YALI1_A11165g	NA	5.183393224	2.227546163	3.038803939	2.73594336	7.573184136	3.198319749	5.003214215	3.110416669	2.914837388	2.381012946	0.516478406	0.938505182	1.39481328	2.291289786	1.898404349	1.156126916
YALI1_A11178r	YALI0A11033r	0.721167753	0.365546037	0	1.141958968	0.39087402	0.487363009	0.32020571	0.306256411	0	0.476202589	0.82636545	0.819059068	1.115850624	0.293285093	0.971983027	1.125967083
YALI1_A11182g	YALI0A11077g	6.985548658	5.724822682	5.405980702	6.348517651	7.870480266	8.524722468	6.21958887	7.100996095	6.04705248	7.21567991	3.82369098	3.498353985	6.468151075	4.936137236	4.324500754	5.136372845
YALI1_A11218g	YALI0A11099g	24.2779485	25.92053718	25.35406115	19.68148978	22.53447948	21.61750318	21.37130532	25.40536133	27.9338583	26.84050957	24.60315317	25.00612154	27.23408152	23.48502597	28.86495049	24.77980589
YALI1_A11231g	YALI0A11121g	32.79448187	35.3886379	38.39371597	40.36234282	37.80695262	38.3168159	43.22777081	43.53593284	26.23353649	28.32584366	24.14981789	26.12515992	23.27895267	27.17943746	29.1594908	24.4883974
YALI1_A11258g	YALI0A11143g	107.5413241	102.2243781	104.1043583	133.4367158	129.7213154	133.7583009	112.5473038	131.0801363	97.23715349	106.6619393	110.9137377	129.9403084	109.3184908	125.608506	128.8257191	122.4112205
YALI1_A11270g	YALI0A11157g	214.9345364	192.0462263	195.3584288	240.4419127	222.2466513	216.1141001	200.5509258	255.0383139	242.5931534	241.4610061	228.6193249	263.2378796	251.6026376	253.2507778	250.568876	236.1076988
YALI1_A11293g	NA	10.63416856	8.642995284	8.405640726	11.48410713	13.05121728	9.416844587	12.04841823	10.30371144	16.20451972	13.55966694	12.25541981	9.949022576	11.78893032	10.16555956	11.57318773	12.48651148
YALI1_A11303g	NA	8.973621472	10.00059187	11.93421183	7.721199838	9.261049223	12.04561983	12.44435826	10.96258742	17.0915465	15.90949559	11.33904865	12.5651107	13.37752737	10.57326087	9.650797382	12.66712969
YALI1_A11341g	YALI0A11198g	15.49080591	12.78375589	16.62475401	12.58419372	14.1013616	17.12673691	14.34122456	14.62092396	15.97793299	18.53547755	23.8604245	17.20488099	29.85611655	18.78727806	20.2484991	18.4889172
YALI1_A11345g	NA	2.704379074	1.621788756	3.081603994	2.332169723	2.972844659	3.39781253	2.232420089	3.008645723	6.773917874	5.633946125	2.531471625	3.172411883	4.321956642	3.841621635	4.774353247	2.650666977
YALI1_A11355g	YALI0A11220g	5.073331285	3.655460371	4.447489796	3.363910137	3.454235525	4.250258802	4.542453092	4.932152658	5.219592532	5.42649462	4.227916255	4.476253045	2.768001548	3.972989917	3.475404427	4.825573214
YALI1_A11357r	YALI0A11242r	0	0	0	0	0	0	0	0	0	0	0	0	0	0	0	0.332798153
YALI1_A11394r	YALI0A11363r	0	0	0	0	0	0	0	0	0	0	0	0	0	0	0	0
YALI1_A11415g	YALI0A11407g	27.89052923	34.49329778	34.95109962	29.26041828	36.41497259	28.2374702	38.19450534	23.82782504	17.43314885	16.61384113	16.21709194	13.89521933	15.2582769	15.39746736	18.70213348	17.97641651
YALI1_A11418r	YALI0A11429r	0	0	0	0	0	0	0	0	0	0	0	0	0	0	0	0
YALI1_A11439g	YALI0A11473g	0.400808373	0.358264244	0.232450341	0.582353577	0.691426553	0.943659054	1.224691161	0.552725713	2.006708768	0.910666306	2.913678977	3.472027284	3.689864613	1.675580967	1.184967355	1.057396521
YALI1_A11481r	YALI0A11495r	0	0	0	0	0	0	0	0	0	0	0	0	0	0	0	0
YALI1_A11500g	YALI0A11517g	19.21489756	44.04665086	36.38534254	18.10673678	22.78337756	21.29469005	21.00087898	21.43794874	44.90425165	42.42922168	47.46017787	45.28191423	39.13854441	43.39826707	39.1858022	37.27139431
YALI1_A11506g	YALI0A11539g	5.414368892	7.417095939	8.715441007	5.093800374	5.486022292	6.415598121	7.284347733	6.01393553	8.018826508	9.114043329	9.463770298	11.01141651	10.76494897	8.18247154	9.588753718	9.02542376
YALI1_A11557g	YALI0A11550g	0.174476069	0	0	0	0	0	0	0	0	0.230420608	0	0	0	0.070956071	0.117578592	0
YALI1_A11568g	NA	0.303862817	0.246435531	0	0	0.263510575	0.657118664	0.107934509	0.154848747	0.393011783	0.160517727	0.139275076	0.184058218	0	0.049430072	0	0
YALI1_A11588g	NA	4.235159681	1.913943873	2.10996198	3.016495386	1.659370839	3.586256106	4.259340101	4.897213357	0.824953978	0.673871588	0.233877014	0.618157787	0.210537854	0.539533897	0.275089536	0.546291307
YALI1_A11612g	YALI0A11561g	3.302189185	2.443386669	3.275510772	3.245567592	3.291570694	3.385890381	3.38743935	3.586423755	2.6080124	3.934937184	3.153236585	4.210250998	4.365520862	3.326470392	4.258820367	3.183185138
YALI1_A11622g	NA	5.579561036	6.291239691	5.220345293	5.529485528	4.937356041	6.156164328	6.673761108	5.270834012	8.836559661	8.872406134	4.566756434	4.655704175	4.463402496	4.352968216	4.834336633	5.435119304
YALI1_A11643g	NA	11.43088062	6.839856261	11.82940585	7.416846903	9.066665411	12.51065869	12.37908672	8.950896122	3.425685178	3.53469963	1.661250131	1.351025267	2.87590367	1.269894215	2.179446477	2.93514247
YALI1_A11654g	YALI0A11605g	9.594227069	6.446592261	8.179210602	6.958478943	7.079568698	8.089314996	9.534349451	7.444606764	4.151600168	2.536780148	2.757125847	2.633236629	3.462265488	2.063959577	1.94850803	3.129857767
YALI1_A11676g	YALI0A11627g	0.727493786	0.320654418	0.056866506	0	0	0	0.112352881	0.053729195	0.204549992	0.167088628	0.144976395	0.095796382	0.130508845	0.10290705	0.170523338	0.225757811
YALI1_A11723g	NA	0	0.047473511	0	0	0	0	0	0	0	0	0	0	0	0.038088973	0	0
YALI1_A11745g	NA	0.033699428	0.034163181	0	0.071150091	0.219181693	0.09109589	0.059851535	0.028622094	0	0	0	0	0.069523403	0.054819643	0	0
YALI1_A11797g	YALI0A11649g	1.512460564	0.801340852	1.365188789	1.892314055	1.889149463	2.506919047	1.624979494	1.897802958	1.71066406	1.709726212	0.399394118	0.508966509	1.104294058	0.946679729	0.637549281	0.666362239
YALI1_A11821g	NA	19.02723848	17.18392755	15.02037376	11.31762905	16.54234692	16.84013255	17.66849363	14.72491759	25.45277648	21.17400798	11.39941625	17.77065656	18.13257264	15.75098064	15.23062689	15.07991629
YALI1_A11833g	NA	32.69293813	24.91805486	31.54953778	24.86932863	34.13633108	27.61723719	37.89100899	31.1360684	32.64617875	36.03266258	31.12643195	29.8501527	34.09543573	21.36093091	27.94451202	28.363647
YALI1_A11854g	YALI0A11671g	14.72735315	10.84738032	12.43525245	14.90837918	14.54521186	15.18229341	14.96253392	15.438084	15.97077848	17.21961282	17.23779014	17.73488499	17.97655847	12.6176241	14.73795633	14.61367247
YALI1_A11876g	NA	7.243032649	6.675188503	5.242597404	6.355249907	5.506225324	7.501152404	10.02383091	7.829511712	7.451845149	7.950512792	5.173766295	4.629464297	4.463402496	5.470404552	6.212239345	6.545994968
YALI1_A11880r	YALI0A11693r	13.7150653	10.96638111	10.07146448	11.01174719	8.794665449	16.18741424	16.12464467	15.42219782	22.48588842	11.73499237	12.83817753	11.99336492	16.73775936	10.2126059	11.97621944	14.30437774
YALI1_A11905g	YALI0A11737g	2.612034422	1.33736355	3.984539018	4.512130555	3.317662413	3.708713632	2.436687352	2.285718576	13.05278401	21.0458315	10.82337187	15.98164035	14.64213746	14.54980191	10.98814958	9.792382717
YALI1_A11954g	YALI0A11759g	0.087238035	0.053063134	0.047052448	0	0.113479554	0.047164162	0.061975299	0.044456576	0	0.046084122	0	0.052842521	0.107985544	0.156103356	0.164610029	0.077831826
YALI1_A11966t	YALI0A07249g:2	0	0	0	0	0	0.020448798	0	0.00642496	0	0	0	0	0.031212605	0	0.040782505	0
YALI1_A11988t	NA	0.016629541	0.016858388	0.007474383	0.017555096	0	0.044952776	0.007383683	0.014124047	0.013442755	0	0.009527657	0	0.034307475	0.043958949	0	0.007418252
YALI1_A12037g	YALI0A11781g	0.292365305	0.148194339	0.219012896	0.188611842	0.528208135	0.307346042	0.216355209	0.427655348	1.943224925	1.930551037	1.414499419	1.414291183	2.111068748	1.426792342	2.408066057	1.673734853
YALI1_A12067g	YALI0A11803g	0.753542157	0.47532302	0.481692761	1.732383573	1.23433901	1.584306996	1.397802015	0.995570375	0	0.486522769	0.153504418	0.050715732	0.276371672	0.163440609	0.270831184	0.253977538
YALI1_A12085g	YALI0A11847g	0.022536492	0	0	0.285489742	0	0	0	0.076564103	0	0	0	0.034127461	0	0	0	0
YALI1_A12099g	YALI0A11869g	20.44261803	18.34107674	21.17571608	19.94126603	20.75568943	20.98636908	19.49420487	20.34261455	20.98405536	21.76332689	19.31571898	18.55711147	19.18448971	20.09851806	18.48771839	20.90954167
YALI1_A12138g	NA	5.82670764	5.65765571	5.525098071	4.827372	4.104177209	2.791260872	5.239729796	5.846713292	2.861840345	3.246835835	2.873498042	3.797455678	2.637465111	3.299457291	3.214171145	2.654065268
YALI1_A12152g	YALI0A11891g	12.32693717	10.96638111	11.533321	6.506510397	7.226624322	10.71065218	14.07415794	9.50819321	2.236968228	2.159523369	1.15306807	3.80957706	5.968503338	2.915799467	2.627744811	3.254456354
YALI1_A12167g	YALI0A11935g	21.96207378	21.49920762	22.29775393	19.65231712	21.87076493	23.86945343	24.30584736	24.40080145	34.24594996	27.97413349	20.69757185	22.70507928	27.55891541	22.75346672	23.32759264	25.45209314
YALI1_A12177r	YALI0A11957r	0	1.421567922	0.360154541	0.845895532	0.434304467	3.249086729	2.846272975	0.850712251	1.295483284	0	0.918183833	1.213420841	0.826556018	1.466425463	1.619971711	3.753223611
YALI1_A12225g	YALI0A12001g	24.98637308	27.08598366	29.1941913	25.12140047	27.89551141	26.11338799	35.42008033	20.72691509	11.13528518	12.53481258	15.52658412	14.92683428	13.69528403	11.11258523	17.55310358	12.5801905
YALI1_A12245g	YALI0A12023g	60.60393514	52.73594194	63.78791722	60.95644455	62.43311991	71.50763062	53.89947305	66.22664222	50.13918238	50.6595041	48.69351363	41.98726007	62.19058256	47.17585806	54.18888308	55.2882228
YALI1_A12284g	YALI0A12045g	144.8634863	160.7962146	165.5452517	192.0692432	174.7630708	176.1553046	161.4531199	192.415737	198.9113128	209.8160082	209.5284445	211.2284259	191.9128633	218.0026962	212.6359254	209.5345285
YALI1_A12294g	NA	25.49440689	25.90236372	20.96774718	24.86139836	27.78869986	27.49031974	26.4670032	29.23791669	18.85535435	18.15522371	10.52324753	14.50417099	13.01825728	13.70191292	17.31344766	17.41730332
YALI1_A12302g	YALI0A12067g	122.9643277	163.1712745	154.9290882	112.5960509	116.0725894	111.5990659	137.6420486	87.83788933	67.92838435	71.49940323	83.89405763	85.50660124	46.73635222	72.83246465	88.92236023	69.86590784
YALI1_A12356g	YALI0A12111g	18.49602116	22.93148622	23.44220181	15.84468068	15.03468998	17.70172073	21.35657725	19.32696705	23.86002605	25.51085299	26.9601728	24.6156502	27.9161915	24.57310097	28.96422635	29.59110432
YALI1_A12403g	YALI0A12133g	44.86682954	66.51645924	60.89232408	46.17692707	52.29260537	51.91783908	64.14765528	38.08785546	32.17835038	31.54223386	37.31529641	38.33060212	28.2790418	33.29182132	42.42069374	31.89292567
YALI1_A12411g	YALI0A12155g	63.37682458	90.93743552	77.41110378	69.83626218	79.6922019	74.39769968	88.01329914	53.61368366	44.00186956	40.05015878	50.55651033	46.20539607	31.6934477	42.8470064	49.07678427	39.41082399
YALI1_A12437g	YALI0A12177g	72.85583102	126.1420156	153.6825503	161.5141443	123.354942	145.750807	85.95391388	141.7735289	246.8555236	292.8086416	315.615504	306.7515214	334.31817	279.6928983	298.1805371	277.6657506
YALI1_A12445g	YALI0A12199g	5.690464301	6.082914523	7.44506965	7.494105725	5.252369643	8.528852663	6.003857058	6.69935898	7.469270807	11.60743811	12.78284055	11.90195208	12.55331952	11.47936183	12.75727723	14.30078728
YALI1_A12465g	YALI0A12221g	2.664608793	4.132551706	5.148091379	1.637367637	2.888444044	2.580157108	2.472176435	1.992918554	2.507617459	4.254309895	4.238161039	5.14923164	6.85099464	4.221364476	3.778941363	3.903037158
YALI1_A12475g	YALI0A12243g	2.839348085	4.52033824	4.691329112	2.955161839	3.554713823	3.405235074	2.290565798	2.5898763	4.75210088	4.462748848	5.361446819	5.813654012	6.002080066	4.212246154	4.231090625	3.987118718
YALI1_A12492g	YALI0A12265g	5.061052266	9.791411708	7.709879708	5.709794838	4.774246958	4.908441737	4.665854628	4.495406597	6.745766527	9.592080723	10.27054202	9.302170842	8.847101376	8.138661318	9.737187107	10.34051403
YALI1_A12502g	YALI0A12287g	20.13039031	19.66825828	22.27264534	19.59243327	21.68488589	22.02092421	21.15476693	22.37811088	19.37509558	21.04395265	20.14265784	20.78763884	22.68622776	19.56491913	21.98575578	20.51459985
YALI1_A12530r	YALI0A12309r	0.338047384	0	0	0	0	0	0	0	0	0	0	0	0	0	0	0
YALI1_A12540g	YALI0A12353g	1.407156591	1.263065575	1.159521937	2.35200221	2.574048424	2.218888498	2.134704732	3.012766315	1.374476167	2.593949063	1.310091567	0.754688572	1.421273153	1.669102153	1.758261979	1.229278813
YALI1_A12597r	YALI0A12375r	0	0	0	0	0.434304467	0	0	0	0	0	0	0	0	0	0	0
YALI1_A12601g	YALI0A12419g	1.468603206	1.924563573	2.189548798	1.815034121	0.776570901	0.968270879	2.990000336	1.186490067	1.389856238	0.283829358	0.492535699	2.549389152	1.404050454	1.165371229	1.834537501	1.150467786
YALI1_A12617g	YALI0A12441g	19.93998018	15.16859838	19.64227458	15.29118846	14.76635186	17.24515264	20.99126319	19.50094238	14.39979496	9.64615501	9.075894044	13.5576444	13.51101183	9.274827713	12.00440576	9.321192704
YALI1_A12629r	YALI0A12452r	0	0.552926779	0	0	0.591238013	0	0	0	0	0	0	0	0	0.110906127	0.183778303	0.121653106
YALI1_A12630r	YALI0A12463r	0	0	0	0	0	0	0	0	0	0	0	0	0	0	0	0
YALI1_A12638g	YALI0A12507g	18.63016695	31.07141315	30.77320466	19.45559723	18.14427549	17.14795774	21.70283144	19.4718582	19.28830667	17.57834249	19.63893199	22.31346103	14.32697097	20.65668461	18.68967363	19.67960105
YALI1_A12676r	YALI0A12529r	0	0	0.678430647	0	0	0	0	1.923005368	2.440328976	0	1.729602104	0	2.335501306	1.995020688	1.780085194	2.693343189
YALI1_A12688g	YALI0A12573g	1.51854724	0.968639341	1.426416486	1.47698163	1.683101064	2.075520702	1.681837561	1.340475614	2.951617671	3.109587885	1.955123304	2.015350388	2.39362279	2.282905255	2.023687059	2.306228208
YALI1_A12729g	YALI0A12617g	18.26621555	19.64022135	18.40048178	23.13451357	26.08073202	25.20843152	21.92442974	24.48401196	29.28657738	33.40602215	26.92811552	28.54350243	27.10266494	27.43859023	30.21212328	30.63822993
YALI1_A12754r	YALI0A12639r	2.203568134	3.046216976	3.241390868	0.845895532	0.868608933	0.541514455	2.490488853	0.850712251	6.477416418	4.762025891	4.13182725	2.730196893	4.132780089	2.118170113	3.509938708	3.217048809
YALI1_A12756g	YALI0A12683g	1.894041662	1.247079441	1.755265813	1.64903822	1.26998779	1.266791938	1.144417519	1.260405444	1.830980886	1.650377204	1.655714169	1.921979762	2.698988874	1.095848631	1.842206098	1.306563145
YALI1_A12772g	YALI0A12705g	4.337988768	4.481186191	4.639960532	3.883819839	3.809533595	3.339797272	3.413360358	2.891557988	9.055230871	5.728934701	3.712352402	5.98703075	7.023628293	5.180873716	4.625553744	5.511441488
YALI1_A12812r	YALI0A12727r	0	0.401209065	0	0	0	0	0	0.168067542	0	0	0	0	0	0.643796545	0	0
YALI1_A12822g	NA	0.31507329	0.212939439	0	0.443479211	1.366161623	0.709751955	0.279791397	0.535205378	0.339592705	0	0	0.159040596	0	0	0	0.093700451
YALI1_A12836r	YALI0A12771r	0	0	0	0	0	0	0	0	0	0	0	0	0	0	0	0
YALI1_A12837r	YALI0A12782r	0	0	0	0	0	0	0	0	0	0	0	0	0	0	0.537777494	0
YALI1_A12846r	YALI0A12793r	0	0	0	0	0	0	0	0	0	0	0	0	0	0.366606366	0	0
YALI1_A12852g	YALI0A12815g	0.027808525	0.028191211	0.149987238	0.17613763	0.060289052	0	0.049389055	0.023618746	0	0	0.063729983	0	0.114740424	0.011309194	0	0.024810145
YALI1_A12868g	YALI0A12837g	0	0	0	0	0	0	0	0	0	0	0	0	0	0	0	0
YALI1_A12874r	YALI0A12859r	0	0	0	0	0	0	0	0	0	0	0	0	0	0	0	0
YALI1_A12929g	YALI0A12925g	0	0	0	0.052144245	0.053544386	0	0	0	1.357595496	1.467747706	11.60307652	8.845089934	20.91583019	0.301320301	2.846046191	0.561881813
YALI1_A12944r	YALI0A12947r	0	0	0	0	0	0	0	0	0	0	0	0	0	0	0.607489392	0
YALI1_A12989g	YALI0A12969g	10.86806544	17.25240642	15.99490073	9.213936842	11.17826636	13.16335605	11.64112347	10.84777379	15.58212136	15.39870055	18.88283668	19.77479058	19.84893166	15.93881134	15.03394308	16.95715447
YALI1_A12995r	YALI0A12991r	0	0	0	0	0	0	0	0	0	0	0	0	0	0	0	0
YALI1_A12996r	YALI0A13002r	0	0	0	0	0.591238013	0	0	0.231622495	0	0	0	0	0	0.44362451	0	0
YALI1_A13007g	NA	1.002485346	0.094537768	0.838290742	0.492223693	0.303264326	0.945316182	0.621088661	0.752440319	0	0.307889605	0.213715203	0.105912811	0.192388039	0.151699186	0.12568746	0.041599769
YALI1_A13019g	YALI0A13013g	1.665328166	0.202012284	1.407446035	1.86319621	1.296055961	1.69294519	1.238690509	1.486955467	0.598308727	0.150379765	0.130478755	0.129325116	0.234915921	0.115770431	0.326125884	0.20318203
YALI1_A13041g	YALI0A13035g	141.3956219	187.2069566	169.9929433	126.6023646	139.9908064	136.6421474	181.8056863	114.10887	118.2128496	115.170478	131.8358954	129.583234	74.32116193	117.9386256	131.9826952	113.0733081
YALI1_A13046g	YALI0A13057g	33.87102222	38.62423936	39.96920946	31.82370947	32.37643996	35.10088733	42.9334641	28.48072023	21.64695413	24.96562103	27.41892715	26.30825756	22.05719432	21.88855654	26.55085988	22.08172841
YALI1_A13095g	YALI0A13079g	5.988267949	6.055009	5.528886709	6.297088022	5.561578912	5.827469126	8.082906987	6.201692313	4.77200521	4.326640667	4.320710781	4.048491964	5.372023718	3.877647902	5.144567306	6.21809577
YALI1_A13100g	YALI0A13101g	89.6608122	84.54164899	85.88352679	95.95944275	95.33927182	94.87256889	89.94356387	102.7488458	84.83512624	87.89882808	87.70058238	102.8106811	94.52605345	91.51632186	96.33596755	90.19455645
YALI1_A13128r	YALI0A13123r	0	0.444583018	0	0	0	0	0	0	0	0	0	0	0	0	0	0
YALI1_A13131g	NA	12.98101955	9.527043592	10.45348555	9.706651225	7.182310116	12.79327899	13.32856267	12.05884616	11.58647862	16.07183738	9.761441877	8.702502596	17.29568467	10.61325429	15.39985608	14.59735897
YALI1_A13148g	NA	12.52844999	11.69374313	11.01411387	9.671693298	10.52966748	10.59268581	12.05672519	12.51588698	18.02440262	17.20160373	11.00415216	9.611407429	14.00506395	9.112786804	14.65413186	12.65481955
YALI1_A13171r	YALI0A13189r	0.729270761	0.739306592	0.655562198	2.309579935	0.790531726	1.971355993	0	0.619394988	1.179035348	0	0.417825227	0.552174653	0	1.334611938	1.965808369	1.789257484
YALI1_A13200g	NA	2.619535809	1.526692273	2.268973608	2.597396868	2.230281173	2.465483459	2.354453748	2.792337861	3.737850298	3.865644547	3.475595863	3.35653618	4.025814016	2.717200122	3.702111822	2.800724846
YALI1_A13224g	NA	2.773018136	0.960254184	1.801686802	1.652072618	1.696432929	2.523402383	1.926110487	1.574033582	4.705168982	3.915980682	2.799994608	3.201398387	3.681740638	3.048229579	3.015861041	2.963930756
YALI1_A13227g	NA	3.815480553	1.61520342	2.110673123	2.478670628	2.454325242	4.420269154	2.233993324	2.243506263	8.541151416	7.309156019	2.786581168	3.301633452	6.055003386	3.035159679	4.464340646	5.124833568
YALI1_A13236g	NA	4.776565637	2.34993881	2.525759118	2.076289032	4.416368797	1.898816919	3.368397726	2.446073928	6.35964521	2.783002144	1.770783107	1.808312228	3.043228975	3.142340277	1.9881471	2.130772588
YALI1_A13287g	YALI0A13255g	0.343413216	0.087034771	0	0	0.372260971	0.348116435	0	0.437509158	0	0.453526275	0	0	0.177119147	0.069829784	0	0.1531928
YALI1_A13330g	NA	39.62078257	29.79420411	41.82565807	15.68473763	19.92044704	25.36636386	30.20735792	20.31254867	13.69622387	10.49940648	8.960589216	4.045954432	5.377593369	7.261456207	8.870808949	8.372078829
YALI1_A13334g	NA	21.78042931	16.71488734	20.33711367	11.23540275	11.53708801	15.87860127	14.25431869	12.29965262	6.487863864	6.989425098	3.798615375	4.359507942	4.919341461	5.321705308	4.977493725	6.460041561
YALI1_A13349g	YALI0A13277g	51.89644222	38.55243287	43.54583863	41.07301324	40.65660426	46.23723149	40.05492957	56.1572544	50.36073064	47.5246708	39.62935041	44.52512707	48.78792144	43.58334218	46.386471	46.95247514
YALI1_A13383g	YALI0A13299g	93.03280797	100.3017303	96.73505573	121.8165849	118.6721724	120.717571	91.7495238	126.4642579	83.80011457	91.18468415	93.74859343	92.65708293	104.2056895	107.2136276	106.2655992	111.4717083
YALI1_A13392g	NA	36.43399585	35.03149522	36.60070522	39.33414222	39.25026617	44.87801044	35.62288521	36.94217952	38.13578916	27.77848436	23.93016615	20.93150951	37.96991707	27.43437637	27.84326379	30.56196369
YALI1_A13397g	NA	30.74451999	23.15926538	24.82223007	24.04124142	22.98956407	27.89511961	23.25704629	27.01906885	24.6227053	18.2335465	19.57181329	16.92003601	20.99561043	17.71287598	21.39002121	20.63567493
YALI1_A13412g	YALI0A13321g	91.69132859	80.289576	79.24043033	85.66958049	83.08399555	93.12114642	81.27125871	97.83798543	86.78581319	79.3104074	70.6345706	86.47248612	92.89899243	75.09320391	91.71643411	80.93367138
YALI1_A13432r	YALI0A13343r	0	0	0	0	0	1.928029487	0	0.151445478	0	0	0	0	0	0.14503109	0	0.636339325
YALI1_A13454g	YALI0A13387g	233.1318357	315.3271284	324.5980448	257.0317202	275.8048593	246.1226327	301.3277413	219.5614542	178.0165998	197.3248675	261.3581842	257.1265608	184.1844765	204.352228	233.2501216	195.3460364
YALI1_A13490r	YALI0A13409r	0	0	0	0.736747721	0.756530361	0	0	0.889131514	0	0.921682431	0.7997085	0	0	0.851472849	0	0
YALI1_A13497r	YALI0A13431r	0	0	0	0	0.295619007	0	0	0.231622495	0	0	0	0.206485479	0	0	0.367556607	0
YALI1_A13498r	YALI0A13453r	0	0	0	0	0	0	0	0	0	0	0	0	0	0	0	0
YALI1_A13508g	YALI0A13497g	0.18867761	0	0.226143549	0	0.272702805	0.680041408	0.111699666	0.320500895	4.06721496	4.069870965	1.008934561	0.333337993	5.06025283	0.562698143	4.789276832	0.252500924
YALI1_A13555g	YALI0A13519g	59.14962435	45.31101299	52.52455731	53.62082973	52.46732037	57.39402362	59.00713872	56.65007401	39.89683675	36.99727808	36.36206625	40.02101119	46.20766046	35.83577225	41.49619845	38.0903219
YALI1_A13566g	YALI0A13541g	113.0112291	150.0620239	140.8002992	121.8873263	135.0584702	119.4182715	152.3425753	102.3617014	93.82347169	109.4145478	119.4705697	127.1950552	82.44166963	115.972689	125.5358961	107.2412682
YALI1_A13591g	NA	74.08740811	74.27810463	67.95613646	32.79812384	47.85934221	44.54271225	49.92975079	49.03663689	101.680374	74.42049765	64.28354488	57.23889533	64.48578606	62.45949384	62.89634353	75.18916403
YALI1_A13593g	NA	30.77144838	30.60213108	29.43533329	18.82689109	20.75857971	19.16522104	25.05393323	24.08665283	40.65016466	36.10130439	34.8413541	30.10595493	42.82453746	27.04960482	31.62228563	39.51753199
YALI1_A13596g	YALI0A13563g	19.90865224	17.77726246	16.09992728	11.54527698	12.94309255	12.71281812	14.3941529	15.9123319	13.94172222	17.43081175	15.27996492	16.83192141	21.38713696	15.84016184	20.10446025	20.4935114
YALI1_A13637g	NA	25.37442094	19.08962638	21.969427	15.79004992	16.79310604	21.11906374	15.06152783	28.7540741	30.0120294	26.80844205	25.70914733	37.61604608	32.51120337	17.86866582	35.09938708	22.6980666
YALI1_A13649g	YALI0A13585g	368.8436179	408.896129	447.5306496	354.2246078	310.5419701	347.107018	326.3272895	370.1384246	265.2401164	278.6279474	317.929095	351.7561115	327.9403901	237.6827042	348.3121356	271.9352435
YALI1_A13682g	YALI0A13607g	0.79902109	0.186926951	0	0.129768065	0.133252507	0	0.218322075	0.365419581	0.596216738	0.162341792	0.140857747	0.186149788	0.760807244	0.599901326	0.082839463	0.219344237
YALI1_A13688r	YALI0A13629r	0	0	0	0	0	0	0	0	0.610082244	0	0	0	0	0.15346313	0	0
YALI1_A13689r	NA	0.405656861	0	0.729312945	0.856469226	0	0	0	0.172269231	0.655838412	0	0	0	0	0	0	0
YALI1_A13693r	NA	7.64952938	6.814822549	7.501504581	7.830575778	7.53828467	8.772534168	6.587088886	5.906373631	8.994355369	9.796167547	2.65617466	10.53075944	6.695103744	7.918697499	14.37146332	4.136205612
YALI1_A13713g	YALI0A13673g	20.08655747	17.76509521	19.91886969	19.47776788	18.96054218	21.28282819	21.24590707	22.69137719	22.21388171	17.4831636	18.1183957	18.21415629	20.13480461	16.52389498	18.54802288	17.42460005
YALI1_A13737g	NA	4.351696997	8.870097134	6.492029642	3.942283455	4.884531262	5.464583813	5.084007916	4.449674096	7.260065734	7.723856545	8.381538301	8.599536005	10.37852506	7.819541198	8.267401993	9.217464384
YALI1_A13749g	NA	4.947034891	7.25519726	8.36041669	3.899372085	5.362600883	5.43825797	6.853183178	4.789924957	5.758581181	6.533267229	9.447775723	8.989672696	9.253395419	6.035592606	8.490034669	7.885692813
YALI1_A13775g	NA	0	0	0	0	0	0	0	0	0	0	0	0	0	0	0	0.052451883
YALI1_A13785g	NA	0	0	0.198452502	0	0	0	0	0	0	0	0	0	0	0	0	0
YALI1_A13831r	YALI0A13717r	0	0	0	0	0	0	0	0	0	0	0	0	0	0	0	0
YALI1_A13837r	YALI0A13761r	0	0.396375221	0.351476118	0	0	0	0	0.332085264	0	0	0	0	0	0.31801998	0	0
YALI1_A13841r	YALI0A13805r	1.865089016	1.890755364	1.00594889	0	0.808704869	2.016674521	3.312472859	2.534535811	2.412279218	1.477870104	2.137152026	2.824341613	0	3.944178831	3.016499048	3.16158245
YALI1_A13845g	YALI0A13849g	0	0	0	0	0	0	0	0	0	0	0	0	0	0	0	0
YALI1_A13862r	YALI0A13871r	0	0.361529048	0	0	0	0	0	0	0	0	0	0	0	0	0	0
YALI1_A13877g	YALI0A13937g	0.112682461	0	0	0	0.122148131	0.456902821	0	0.047852564	0	0	0	0	0	0	0	0
YALI1_A13884r	NA	0	0	0	0	0	0	0	0	0	0	0	0	0	0	0	0
YALI1_A13885r	YALI0A13959r	0	0	0	0	0	0	0	0	0	0	0	0	0	0	0	0
YALI1_A13888r	YALI0A14003r	0	0	0	0	0	0	0	0	0	0	0	0.351025315	0	0	0	0
YALI1_A13903g	NA	10.52827789	8.239446772	10.08817907	6.96167499	6.772362699	8.444150536	9.657541192	7.246976559	0.935241943	1.604318883	1.060575979	0.788399103	0.65638272	0.846919519	0.818648806	0.903182152
YALI1_A13923r	YALI0A14025r	0	0	0	0	0	0	0.678082679	0	1.234519364	0	0	0	0	0	0	0
YALI1_A13962g	YALI0A14069g	0.921947411	0.249235934	0.478841833	0.519072258	0.666262534	0.332292961	0.545805187	0.43502331	0	0.324683583	0.093905165	0	0.084534138	0.133311406	0.110452617	0.109672118
YALI1_A13973r	YALI0A14091r	0	0	0	0	0	0	0	0	0	0	0	0	0	0	0	0
YALI1_A13982r	YALI0A14113r	28.5297133	26.39162048	23.72270679	19.57643945	18.55577765	22.17233911	32.93544443	26.04862217	26.52181711	18.83878374	19.20618601	24.57177204	17.65741647	21.02950801	17.3034341	19.8856039
YALI1_A13994g	YALI0A14157g	32.5666577	29.59072034	29.50075993	31.51228544	29.24133491	32.75819721	33.19600965	35.16133726	39.47944311	33.093066	28.92279075	33.86826525	32.43970801	30.9063088	35.89570228	33.3921522
YALI1_A13996r	YALI0A14168r	0	0	0	0	0	0	0	0	0	0	0	0	0	0	0	0
YALI1_A14020g	NA	21.42152898	17.9646638	17.91294953	18.48170435	22.98956407	17.89135258	17.31638772	13.05619434	16.79866811	14.28607767	15.1681553	14.54907555	20.55514307	13.54514046	19.95123055	16.19106802
YALI1_A14024g	YALI0A14212g	16.91562597	18.008518	16.11161932	16.0098169	17.77327161	17.31572104	18.64727368	18.73568629	21.7755499	22.04537868	18.86057615	22.54821434	22.8858775	19.83124788	20.52599451	19.98355025
YALI1_A14079g	YALI0A14234g	0.628240511	0.308491665	0.300019844	0.601031036	0.085126828	0.583774204	0.174340677	0.842066174	1.015696513	0.544478459	0.449926742	0.505408499	1.215082349	1.037941798	0.952578647	0.97212092
YALI1_A14099g	YALI0A14256g	54.93431997	36.61299764	45.51409861	44.36492347	49.97692741	53.67221384	47.23289974	65.17977887	60.28963978	60.11106804	64.70995903	60.2126171	74.75842679	50.76736842	64.09498298	68.45222067
YALI1_A14109g	NA	77.9686238	54.04195438	60.57005817	71.51759976	73.04044186	78.68021464	63.90546156	87.55559329	117.0875358	107.1455825	101.3698296	99.60591207	115.9349886	96.44854251	102.5524465	120.5984357
YALI1_A14118r	YALI0A14278r	0	0.378151073	1.00594889	0.393778954	0.808704869	0	0.662494572	0.475225465	1.809209413	0	1.282291215	1.412170807	0.769552154	0.910195115	0.251374921	1.164793534
YALI1_A14127g	NA	5.859487993	4.417014615	6.212665831	5.81553178	5.320229716	5.144387321	7.38252053	6.337806273	7.449028881	7.143038837	5.853421937	6.218781812	4.959336107	4.969552957	3.712435171	6.076647751
YALI1_A14131g	NA	11.49361106	8.224785834	13.70224322	9.21353258	6.26286782	9.470349386	12.00771412	10.49276225	12.71929042	13.31202692	7.324602852	5.491418751	7.227668815	8.648577445	9.9407355	10.30917914
YALI1_A14141g	NA	9.047377264	5.881968051	8.545485016	6.851753806	9.025636461	11.16504349	8.267129233	8.129715624	9.645461903	9.264304915	8.489026895	8.041670848	9.129686924	6.398947474	5.787717114	7.399212261
YALI1_A14150g	NA	13.74116935	6.446453762	10.77543451	10.493677	8.556971788	15.01604948	11.03411567	11.48461539	11.10789383	7.529149044	12.22797524	11.84315139	13.57115624	8.798552777	12.21546236	10.17283002
YALI1_A14162g	YALI0A14322g	4.74614675	2.390108704	4.654304836	4.001736553	4.543492881	6.748103206	4.597825576	4.109594568	4.484365213	3.663096839	4.273086301	4.176967896	5.022917339	3.960602105	3.779933993	4.605604065
YALI1_A14171r	YALI0A14344r	0	0	0	0	0	1.218407523	0	0	0	0	0	0	0	0	0	0
YALI1_A14189g	YALI0A14366g	27.85650569	32.38775769	30.33135704	35.50131506	30.92562842	39.01429271	36.38399593	36.10810685	28.99734604	33.45754978	30.37856408	29.70680557	30.87379447	33.25670596	31.27468703	33.0289234
YALI1_A14199g	YALI0A14388g	49.10211744	43.96088429	51.80588188	48.92218418	50.54171023	53.56755163	53.09845987	49.14749614	40.60495214	40.08383533	38.19245536	41.71266036	40.7204619	36.76264878	42.04883094	36.91213829
YALI1_A14215r	YALI0A14410r	0	0.373853902	0.663011768	0	0.799515041	0	0.654966224	0.783041959	0	0	0	0	0	0	0	0
YALI1_A14228g	YALI0A14454g	125.0822601	86.73410516	108.73393	110.123176	105.78199	118.3985381	105.3655921	138.0723831	99.55290772	100.6019596	100.3773977	99.00304887	114.9404174	95.76886291	98.84659557	98.50243504
YALI1_A14237g	NA	0.094338805	0.318790149	0.226143549	0.531143706	0	0.170010352	0.111699666	0.267084079	0	0	0.288267017	0.095239426	0.129750073	0.204617506	0.50859577	0.336667899
YALI1_A14259g	YALI0A14476g	50.11911586	49.67491048	48.12501286	52.76303332	60.39169702	61.71423942	60.65766518	71.12002621	40.18016638	40.38953405	46.73763798	39.56078501	54.18039574	47.64428791	43.61532902	51.89199977
YALI1_A14274g	NA	18.87864623	17.24041646	10.28518256	25.69407677	21.53565514	21.93133542	23.55359307	20.7606509	22.3657715	14.69817607	13.22979302	11.89210762	13.51895948	16.96259454	18.85553612	18.28149852
YALI1_A14287g	YALI0A14498g	245.8498172	266.4074308	286.5277755	304.5880212	252.0463508	290.4851592	265.9363627	310.0846156	327.7684387	331.1250072	253.3237534	269.5363346	270.6899703	298.1900329	313.0874637	307.3113608
YALI1_A14292g	NA	116.74862	121.2135104	128.690114	180.5267049	167.9094992	166.5848244	148.9978483	206.8696892	202.9843143	213.6832469	166.284069	230.9920839	182.9282778	178.357897	182.7121285	179.9836137
YALI1_A14305g	YALI0A14520g	14.66347299	13.28095591	14.59723427	14.2551537	13.87029254	12.67363853	11.57944801	17.41098803	16.85736657	14.18933223	12.47942406	16.30722569	16.12064107	15.72021337	16.02784652	17.79906689
YALI1_A14345g	YALI0A14542g	140.0350855	144.0606778	148.4286902	164.2799614	163.0994232	160.5364727	142.4767165	168.8805604	186.333679	183.8671108	221.0718867	226.5431431	223.1701248	207.9608554	211.5750554	202.2198158
YALI1_A14368g	YALI0A14564g	30.22404767	21.39150307	25.37466499	30.0928243	29.29038793	26.98275888	26.88078834	31.19083529	48.78912366	42.79691938	37.87803865	38.49226092	43.53254151	43.02983214	43.45765314	45.60477346
YALI1_A14377g	NA	24.66257646	19.55326444	22.26162785	14.07697847	15.19246191	13.42547158	20.96441156	20.97567491	28.15842911	20.84509447	14.65629289	15.91756302	17.47464185	13.36383959	14.12126284	16.51013729
YALI1_A14390g	YALI0A14586g	72.7205832	62.16869041	75.72928759	78.57252268	79.81573737	76.85162925	73.70772941	76.96859223	63.16397623	61.74909988	71.9366716	68.47385321	69.33713311	65.50494874	73.86154038	69.17413678
YALI1_A14414g	NA	19.1692752	20.84418763	21.30737821	17.63318994	17.33066427	17.84608666	15.39812751	27.63063351	17.23183279	10.92464763	15.22092244	14.63465835	17.47618992	16.52963408	14.63334741	15.54118432
YALI1_A14430g	NA	25.99693432	23.4362177	31.21145723	18.51078649	22.12851306	20.87014177	18.20524398	25.56253104	18.758389	12.67313342	22.391838	12.68220492	21.86707271	19.65483161	20.92898937	21.36483625
YALI1_A14458g	NA	8.789231989	6.959434168	8.041142731	5.380383598	6.990631511	7.029274173	7.019894406	8.171745569	2.354291737	2.197858104	2.026184517	1.417602233	3.111506548	2.961051415	2.523417473	2.041588667
YALI1_A14483g	NA	0.240389251	0	0	0	0	0	0	0.10208547	0.582967478	0	0.27545515	0.182013126	0	0.097761698	0	0
YALI1_A14510g	NA	34.73546628	34.07411274	32.6454366	22.91333253	25.35604844	27.34296364	31.99977839	26.39970032	19.6467611	20.6869826	20.04204517	17.49808009	29.12804876	17.48283863	19.36076581	22.31044239
YALI1_A14513g	YALI0A14608g	40.21138105	32.23534083	36.22778401	37.57291197	38.57207058	40.61358411	36.95110168	41.32556962	37.24031051	34.66091482	34.76079542	39.49277346	46.2439587	33.84816385	39.73161962	37.56824785
YALI1_A14568g	YALI0A14630g	68.75621002	46.18086463	54.25607259	56.9163648	55.79277751	62.04837182	48.37029714	64.4924056	50.55131414	46.51809391	40.1210646	41.4883807	56.93598237	41.94857715	46.93338537	42.93566556
YALI1_A14586r	YALI0A14652r	0	0.222291509	0	0	0	0	0	0	0	0	0	0	0	0	0	0
YALI1_A14596g	YALI0A14674g	0.239325582	0.169833336	0.129081937	0	0.415087455	0.12938841	0.085010365	0.264247788	0.309540254	0.063212733	0	0.072483103	0	0.077863299	0	0.128112563
YALI1_A14658g	YALI0A14707g	8.548521965	6.688669842	8.871273449	9.05396204	9.256474194	9.811941948	9.013060889	10.22945893	8.27524521	8.293014506	9.677488059	9.991291803	12.56861176	8.130918795	10.1376764	9.698483268
YALI1_A14670g	YALI0A14740g	26.06902553	21.08919445	25.17598973	22.86427735	25.12761557	27.24948342	23.81485982	26.61401862	22.37057617	21.22502969	23.5105511	26.08388109	31.29286585	21.45493254	28.11808042	25.47478431
YALI1_A14691g	NA	45.14232761	39.01500973	38.64735266	40.26137386	37.13303189	32.99072678	42.85830269	49.64887578	47.75848951	41.39299428	33.054618	46.30833961	52.64526021	37.28104734	40.8419791	41.38857026
YALI1_A14703g	YALI0A14762g	54.8229828	48.41080083	53.05645053	52.84064521	62.59127398	53.41755089	51.82276618	58.02753041	65.43042874	55.01393069	57.95431379	52.30482469	56.33088019	57.53790434	58.03122347	54.26653386
YALI1_A14721g	YALI0A14784g	410.4139616	382.7333071	440.868211	459.9480517	463.4682732	463.3765287	491.9401335	403.4559225	415.7330723	507.1557574	654.7203854	541.5164621	633.9510383	616.3492227	545.2473461	582.2664547
YALI1_A14736g	YALI0A14806g	988.1858069	845.6695936	904.42994	1030.936515	991.6432741	988.9570185	984.8853514	960.9262324	803.9428341	892.5640571	1034.20071	950.7982527	1061.585046	917.4575137	872.1910641	912.8155882
YALI1_A14772g	NA	0.510827158	0.487394716	0.108046362	0.634421649	0.39087402	0.243681505	0.106735237	0.20417094	0.388644985	0.317468393	0	0.273019689	0.619917013	0.439927639	0.202496464	0.16085244
YALI1_A14783g	YALI0A14839g	74.54872306	61.9631968	74.36085144	50.85037598	54.51107954	61.48916592	55.00142793	62.40632778	52.03736723	46.42682736	47.57184887	42.4689841	56.1489454	39.06384488	49.32157115	49.66664912
YALI1_A14826g	YALI0A14861g	4.092843815	2.916590721	4.551740368	4.394587702	5.293612999	5.558913881	5.873893824	5.414024056	1.828177381	1.427286206	1.754402135	1.682063951	2.043833705	1.717386342	1.955655026	2.133787231
YALI1_A14882g	YALI0A14883g	1.095231401	0.777212369	0.984534609	1.013888803	0.675810221	0.819863006	0.763107065	1.037550923	0.081724413	0.489554064	0.444074891	0.255158588	0.608329779	0.417999781	0.488262502	0.511119904
YALI1_A14905r	YALI0A14894r	0	0	0	0	0	0	0	0	0	0	0	0	0	0	0	0
YALI1_A14922g	YALI0A14905g	0.500645382	0.543787493	0.62684749	0.830515613	1.162930968	0.894170149	0.698630639	0.865617293	0.173444869	0.543107085	0.51220999	0.406144992	0.405763863	0.487192592	0.421728173	0.366903087
YALI1_A14989g	YALI0A14927g	0.253535538	0.371257694	0.050646732	0.654247325	0.610740656	0	0.300192853	0.191410257	0.182177337	0.074406655	0	0.170637306	0.34870332	0	0	0
YALI1_A14999g	YALI0A14949g	1.365317591	0.904992616	0.944094428	1.552177238	1.252314821	1.987305475	1.585484582	0.401404033	0	0	0	0	0	0	0	0
YALI1_A15017t	YALI0A14971g	11.85556079	33.35607588	28.43583807	11.27540294	10.15680218	11.59333219	13.14784051	11.20620048	16.60574027	13.16772311	14.99352464	14.7885665	11.55299888	13.68663765	13.05181754	12.74633733
YALI1_A15040t	YALI0A14971g	4.350810343	10.83231777	11.74508867	6.338011874	6.53686625	6.506117435	5.895229815	5.425006587	3.420836055	5.169534219	8.031302356	8.631160349	8.32113546	5.345819963	7.592874744	5.958226095
YALI1_A15045g	YALI0A15026g	5.502823506	15.61517311	13.52928362	6.106997958	7.137699495	7.31044514	9.021447822	6.351491644	8.592433692	8.447419842	9.808598601	7.834478041	7.422832412	5.738186593	5.800203062	6.252264425
YALI1_A15053g	YALI0A15026g	9.220955155	18.94343243	15.17205244	8.220728713	9.748303871	8.10314401	9.519368539	8.938628367	13.16944603	11.74728676	11.64876598	10.21356789	13.10788384	11.03794347	10.89089415	11.3662598
YALI1_A15073g	YALI0A15059g	36.27049581	29.57294318	32.71183064	29.13674719	37.67910589	35.85343315	37.40049779	39.04769234	33.94928252	31.09322788	25.97582572	30.71471505	28.63469616	25.15027494	32.05399908	27.78252814
YALI1_A15079g	YALI0A15081g	55.81740953	45.3721669	51.03000488	57.45802554	59.0536695	57.42980326	51.62235293	69.28016638	47.58275088	40.41286837	35.28803813	36.56250163	35.53632393	44.29001229	36.84341067	42.27810766
YALI1_A15105g	YALI0A15103g	20.61399151	11.50724004	13.11440285	23.09165327	17.70898621	29.04285688	12.67753218	32.47724231	80.12828493	91.45033395	62.71523504	74.87147092	70.21509029	78.05722884	79.85386065	75.4693389
YALI1_A15132g	YALI0A15125g	9.806883284	7.503812682	9.438167528	16.75400008	17.85306942	19.4776566	14.77488976	14.87039128	20.48454926	19.89669987	15.22628381	18.08165001	22.91547908	16.66092736	18.70394674	17.92475033
YALI1_A15172g	NA	18.44628711	17.02244232	16.40047021	17.0441637	22.05229545	17.02133495	22.8684227	20.08950633	18.66366029	21.64234155	18.13070465	15.76994325	21.73410544	17.36729261	19.96554687	20.20258637
YALI1_A15178g	NA	7.186980004	12.3935129	14.38644714	14.70467712	15.90268273	11.81688392	12.23799904	15.10305586	16.05157027	12.72048012	18.50832206	11.55658685	17.73132498	17.35604931	19.67267016	23.66513987
YALI1_A15185g	NA	15.91017819	12.60421725	13.70224322	15.79462728	15.15271363	11.29796067	14.28450147	16.76455546	14.53633191	14.28607767	12.55646203	9.041561139	13.25978339	11.28385827	11.2661669	12.28327727
YALI1_A15192g	NA	17.29163589	12.37871807	13.03923145	13.84192688	14.30243573	15.39624052	11.86216607	16.98331004	16.16409824	13.63671051	11.26861977	12.78228545	14.96254246	12.29797718	9.9407355	13.27032634
YALI1_A15227g	YALI0A15147g	83.08410438	66.19106537	67.37263426	81.04963791	74.01966756	78.46684096	56.15068606	98.06347815	81.78248626	70.28422741	53.80846662	57.26372853	91.09049936	69.93462866	65.21198444	76.66992399
YALI1_A15274g	YALI0A15169g	0.069491539	0	0.041645279	0	0	0	0	0.039347719	0	0	0	0	0	0.018840584	0	0
YALI1_A15297r	YALI0A15191r	0	0	0	0	0	0	0	0	0	0	0	0	0	0	0	0
YALI1_A15302r	NA	0	0	0	0	0	0	0	0	0	0	0	0	0	0	0	0
YALI1_A15303r	YALI0A15213r	0	0	0	0	0	0	0	0	0	0	0	0	0	0	0	0
YALI1_A15311g	NA	0	0	0	0	0.14043378	0	0	0	0	0.171090751	0	0	0	0	0	0
YALI1_A15349g	YALI0A15257g	32.78790909	48.02368327	57.47929053	45.76913446	52.83324193	51.06851501	51.78780104	42.44743063	44.09792144	43.81215236	72.0869193	53.46671753	69.91362972	48.48296331	60.53259955	59.14204119
YALI1_A15366g	NA	1.183165845	3.598343803	2.187938836	1.42744871	1.392488696	2.284514106	2.221427111	1.52171154	1.093064021	0.892879855	1.859322262	1.075015027	1.464553944	1.622233168	1.412412836	1.507991629
YALI1_A15373g	NA	6.523966013	11.07943659	9.02242819	6.357297346	3.505777292	5.426309794	7.130353949	7.198604288	17.12842589	15.75886919	10.86202009	8.275029758	8.972819451	12.97106234	10.14569912	9.253161008
YALI1_A15382r	YALI0A15279r	0.364635381	0.369653296	0.655562198	0	0	0.985677996	0.647607053	0.464546241	0.589517674	1.92621272	0	0.552174653	0.752258848	1.334611938	0.491452092	0.975958628
YALI1_A15391r	YALI0A15323r	0	0	0	0	0	0	0	0	0	0	0	0	0	0	0	0
YALI1_A15397r	YALI0A15334r	0	0	0	0	0	0	0	0	0	0	0	0	0	0	0	0
YALI1_A15414g	YALI0A15345g	15.47697196	14.72079503	15.94888182	14.80182484	16.73040391	17.76391606	17.52973296	17.01478688	12.50409542	14.0130953	14.36928457	16.43335073	16.34685628	12.09801007	14.62617771	14.8993415
YALI1_A15437g	NA	15.37545855	20.88541122	19.12056411	16.93691952	21.21260131	14.62089028	18.56473553	19.97548835	22.79468339	23.43558809	17.40938448	23.0993063	17.67808292	21.50208122	18.92090555	20.44091125
YALI1_A15461g	YALI0A15378g	0	0.033846855	0	0.140982589	0	0	0.355784122	0	0.215913881	0.529113988	0	0	0	0.162936163	0.089998428	0
YALI1_A15482g	YALI0A15400g	47.58491718	49.07147503	54.19314171	46.51237368	42.95222376	42.95913268	50.83715369	46.48043219	24.26847758	24.077659	21.37872414	26.87249976	18.74378295	26.61809365	30.67480142	21.47108981
YALI1_A15497g	YALI0A15422g	65.93419777	60.7032866	59.85099156	72.86304564	69.73469241	72.97506299	62.86516523	90.1288224	101.1422779	98.86471452	82.76452194	93.86561884	86.70060601	94.3897841	93.15554141	92.98836879
YALI1_A15507g	YALI0A15433g	141.8367284	87.53752453	94.49607731	112.0463269	120.0213167	118.687227	129.8528331	156.5690861	134.5626107	85.54839454	72.33128173	84.31490405	101.4767685	85.08718097	96.48360927	96.45469283
YALI1_A15515g	YALI0A15444g	26.68320686	28.75628825	27.06561375	20.42837709	22.86613017	24.5306048	27.11075009	26.87400002	30.50863133	26.90544628	23.89573426	22.16009811	26.96639008	21.70309685	29.07849222	27.98832464
YALI1_A15523g	NA	25.1120914	31.92000217	22.66079509	18.96467571	23.66183799	26.89199462	22.21427111	29.49085167	34.97804866	32.39878329	19.47861418	24.49864176	24.80775048	21.56431015	28.70387376	20.76719901
YALI1_A15528g	YALI0A15466g	17.69305631	12.42236957	14.00940121	15.22611957	16.09870964	15.77734488	19.15807043	19.77689702	10.77007713	12.18755779	9.734304876	10.41176781	9.14114918	11.15974632	9.390344495	11.55956521
YALI1_A15544g	YALI0A15488g	7.081675753	5.004581893	5.498678247	6.955765249	6.052242889	7.7127277	6.142845779	7.444297189	4.745598632	6.370452093	2.516729691	3.885479449	3.176045419	3.238935937	3.209203921	3.433757031
YALI1_A15564r	YALI0A15510r	0	0.328991433	0	0.685175381	0	0	0	0	0	0	0	0	0	0.263956583	0.437392362	0
YALI1_A15584g	YALI0A15554g	18.25455875	16.98364867	18.67483148	20.8555818	18.71245917	20.15119456	18.91604834	22.28313688	23.36601789	20.66379092	19.88106488	23.32190917	24.78057879	19.79674375	21.10039452	21.62107479
YALI1_A15624g	YALI0A15576g	0.185926061	0.137079764	0.227910295	0.107058653	0.403088833	0.296986834	0.270173568	0.265581731	0.191286204	0.267863956	0.154943522	0.179169171	0.139481328	0.164972865	0.091123409	0.075399581
YALI1_A15633g	NA	0	0	0.120051514	0	0	0	0	0	0	0	0	0	0	0.054312054	0	0
YALI1_A15666g	YALI0A15598g	2.834710595	0.429406489	1.113007708	3.646013571	2.613675676	2.730407221	2.372608572	2.075532903	0.421422273	1.376971342	1.418759959	1.2828636	0.873858922	1.404588244	1.361361769	1.308137317
YALI1_A15675g	YALI0A15642g	1.361144434	0.798875445	1.73875934	1.285649169	1.009542171	2.517504287	1.908510853	1.703678045	0.926570825	1.513756575	0.492535699	0.92211948	1.330153062	0.903162702	0.579327632	0.86285084
YALI1_A15682r	YALI0A15664r	0	0	0	0	0.858016141	0	0	0.336135085	0	0	0	0	0	0.643796545	0	0.706181446
YALI1_A15720g	YALI0A15686g	56.69832624	60.43793746	63.15760985	59.76096879	64.87633046	64.43911724	59.35870407	68.98254118	62.06644581	58.87551562	65.67585696	68.46066018	64.98523135	67.98718785	65.31933797	67.84303848
YALI1_A15722g	YALI0A15708g	77.66638652	81.87303086	75.13442739	56.96412507	73.35758706	66.39369121	71.46466104	59.85458539	61.45069291	51.00576169	53.62498452	46.83994045	41.16878572	47.65309932	50.53077776	51.16804097
YALI1_A15740r	YALI0A15730r	0	0	0	0	0	0	0	0	0	0	0	0	0	0	0	0
YALI1_A15766g	YALI0A15752g	5.714091268	3.183788065	2.744726138	1.565588907	2.175024788	0.943283244	3.563579673	3.408337472	1.974567263	0.576051519	0.699744937	0.198159452	0.989867489	1.277209274	0.940628736	0.817234173
YALI1_A15784g	YALI0A15774g	39.12024212	31.0792913	37.22010893	35.85849603	34.82485341	43.6736076	42.31684078	38.13684353	23.63279796	22.87619765	22.97438428	25.29550958	27.29505298	23.07723864	25.04322647	24.54386376
YALI1_A15813g	NA	0.303076965	0.283613305	0.335316297	0.246111846	0.35380838	0.882295103	0.496870929	0.277214854	0.226151177	0	0.267144003	0.494259782	1.058134212	0.189623982	0.06284373	0.124799307
YALI1_A15835r	YALI0A15818r	0	0.536399076	0	0	0	0.476768161	0.313244716	0	0	0	0	0	0	0	0	0
YALI1_A15843r	YALI0A15862r	0	0.68539882	0	0	0	1.218407523	0	0	0	0	0	0	0	0	0	0
YALI1_A15846g	YALI0A15884g	10.81751629	14.14333701	15.35834986	12.44882308	14.24257695	11.48336018	14.55355565	11.47475736	13.58589444	12.50798217	12.60827972	12.61983714	12.35577086	12.5936367	12.92153401	13.06839785
YALI1_A15863g	YALI0A15906g	5.184431772	5.710603989	6.3184716	4.525736001	5.295712528	5.996586336	10.53580077	4.615015956	2.417837465	2.567543914	2.3991255	2.302424108	3.342409703	3.912720474	2.553135139	4.269631599
YALI1_A15875r	YALI0A15928r	0	0	0	0	0	0	0	0	0	0	0	0	0	0	0	0
YALI1_A15879g	YALI0A15950g	57.15212318	60.86597741	65.99032554	65.51589358	71.41213549	66.35766207	68.98263427	63.29955074	42.9257478	50.46857346	55.73622576	60.04200527	55.2450344	52.04611213	60.62687354	51.19842982
YALI1_A15925g	YALI0A15972g	204.1925863	190.3750821	209.3135324	236.3080283	225.0119911	219.6152605	200.6244624	229.8549219	189.3354551	215.1340015	214.1237201	227.0170797	202.8280692	236.1983172	211.4278124	211.8127712
YALI1_A15953r	YALI0A15994r	1.315643874	0.444583018	0	0.462956338	0.950774643	1.778216385	2.33663626	0.372474013	1.418029	0	0	0.99615292	1.357115624	0.356698086	0	0.782525386
YALI1_A15961g	YALI0A16016g	0.302587868	0	0.272004828	0.559000893	0.492009256	0.204487976	0.268704092	0.931619151	0.978406955	0.999026411	0.173363381	0.114553716	0.156063024	0.184585023	0.101956262	0.202471603
YALI1_A15978g	YALI0A16038g	18.91262432	23.48633288	26.83871639	14.73127068	18.72286556	16.08297931	20.49316542	19.00321027	24.07655683	24.66729412	23.22086914	24.13494053	19.89933613	21.5564543	21.94251683	25.54336755
YALI1_A16004g	YALI0A16060g	36.77289163	27.73120809	34.82332037	38.80784582	38.14031505	41.25072535	32.15207229	47.07041546	51.31789685	51.9227053	44.26230546	47.81488563	54.73854498	47.79583444	53.54389045	51.74362079
YALI1_A16020g	NA	16.95282404	15.05831436	15.52964879	13.97621423	12.60131169	14.18444579	16.20145307	19.74668199	19.57726604	20.04315375	9.990388275	16.25893374	15.32212797	15.82426283	16.10300238	15.55707185
YALI1_A16028g	YALI0A16082g	6.958141991	7.339479026	8.255417367	5.590840779	7.145665677	8.148100312	7.604885606	10.12081732	11.11281754	9.375238473	7.876295695	7.806656741	10.80980292	8.500685104	7.138000352	8.721218256
YALI1_A16031g	NA	5.408758147	3.102331499	4.222338105	5.709794838	2.93155515	5.771404058	8.089407404	5.198299599	9.204749647	9.210760605	5.21915021	7.867277889	5.432430669	5.788521564	4.891888259	5.77798898
YALI1_A16050r	YALI0A16104r	0	0	0	0	0	0	0	0	0	0	0	0	0	0	0	0
YALI1_A16068r	YALI0A16126r	6.954117618	3.870487451	5.393238587	7.772998015	11.23352225	10.68922231	5.812137252	6.369618622	10.14069478	12.60536265	5.312349321	11.35670136	15.4718784	5.767118627	8.270023652	8.637370543
YALI1_A16075g	YALI0A16148g	3.750598715	2.561490479	3.76190619	3.750960113	6.933020938	4.695760382	3.0851937	5.197417186	7.914740937	7.090899867	6.514413766	6.99488401	9.93677198	6.036963219	5.640339462	5.177804835
YALI1_A16095g	YALI0A16170g	102.6788844	100.0992813	115.3368692	106.5089238	108.6857469	108.3081484	110.859569	118.637192	117.4424773	114.7971873	116.3731151	124.1576917	112.6323008	112.644255	112.8868637	107.7555184
YALI1_A16121g	YALI0A16214g	65.85348276	87.17521862	88.3168005	79.06110442	81.50526482	84.48070575	80.53392919	71.58848478	116.5296087	130.9230954	166.9145008	146.4208334	160.3156349	139.1135564	136.4304669	129.7748676
YALI1_A16136g	NA	24.33941166	32.00392855	28.37870781	17.94506949	20.93967964	17.90313095	22.7411402	24.23488228	18.02440262	16.32694591	11.38360569	12.28588602	10.24760777	12.38979881	13.09201628	15.21532779
YALI1_A16145g	NA	6.24582786	9.660859552	6.367017777	6.525479815	4.885925249	6.266095834	6.975910105	4.921978026	13.74137626	11.73499237	11.95278597	10.14073132	8.50171904	13.87866956	9.199125074	12.81074794
YALI1_A16178g	NA	3.675855052	7.788259984	7.014621597	3.902617055	3.472327459	4.258511732	4.215523713	3.822258405	6.112668697	6.560499747	7.040152255	6.488856305	8.038457893	5.590925041	6.263628485	6.404425809
YALI1_A16215g	YALI0A16291g	113.6234011	86.23017557	99.09901935	111.8341811	108.3890804	124.1708455	118.5345443	113.6054802	61.424347	64.60018335	64.17903932	66.64071832	73.94207237	64.806372	66.04340876	66.83007964
YALI1_A16230g	NA	2.42267292	1.941963322	3.443977797	0.951632473	0.488592525	1.523009404	2.301478539	1.818397437	0.364354674	0	0.129119602	0.170637306	0.23246888	0.183303183	0	0.201065551
YALI1_A16264g	YALI0A16313g	0.687818955	0.253557945	0.337254541	0.792110267	0.610034598	0.845138166	1.277121039	0.982498889	1.213111514	1.651569673	1.504653854	0.804855731	1.225500685	0.584874896	1.474829737	0.669443683
YALI1_A16274r	YALI0A16335r	3.134621199	1.121561705	0.331505884	0.778608387	2.798302643	2.990636648	5.567212908	3.132167835	11.92433477	11.20158363	7.606318346	8.097515785	10.27089779	11.39812519	9.9407355	12.99614604
YALI1_A16292g	YALI0A16379g	544.7237598	379.0764625	391.967506	507.3234282	401.0367445	509.1829475	295.897522	666.9083346	498.1873502	575.484026	535.3077332	595.9707795	764.6764919	657.6918201	650.4440987	627.2693684
YALI1_A16303g	NA	1.223409581	1.174969405	0.810347717	1.223527465	0.139597864	1.392465741	0.114359182	1.750036631	1.665621365	1.530651179	2.065913625	1.56011251	2.25826912	1.152191435	1.648899777	1.780866305
YALI1_A16314g	NA	0.245852643	0.249235934	0.386756865	0.129768065	0.133252507	0.16614648	0.272902594	0.469825175	0.099369456	0	0.140857747	0.093074894	0.253602415	0.099983554	0	0.164508178
YALI1_A16335g	YALI0A16401g	0.130018225	0.184530451	0.04675083	0.274509367	0.394632424	0.140585483	0	0.530059172	0.252245543	0.549464526	0.238374649	0.393778398	0.160939994	0.296105142	0.07009493	0.231998712
YALI1_A16392g	YALI0A16423g	0.23557309	0.124183758	0.18635174	0.198947555	0.173646124	0.382079014	0.200825881	0.220088448	0.639842353	0.323552282	0.496683067	0.520830244	0.340198361	0.467518919	0.30480304	0.445566865
YALI1_A16422g	YALI0A16445g	0.70024101	0.261104312	0.723524747	0.373855614	0.506042258	1.044349306	0.171538773	0.998067766	0.052050668	0.212590442	0.036891315	0.12188379	0.13283936	0.124384303	0.108480249	0.122075513
YALI1_A16461g	YALI0A16467g	62.52013354	54.52968246	67.22695706	55.92901401	57.06145142	61.13143889	80.25313182	65.7968989	43.79141525	36.22139379	34.35598091	42.56527439	30.75178885	39.14316786	38.28618182	38.37660587
YALI1_A16466g	YALI0A16489g	50.83607368	57.8746009	52.55549934	41.32175224	44.43085319	45.76423171	51.33471306	49.23116056	43.267644	42.11502667	41.62875662	40.69255889	41.34452312	36.09695279	43.1703733	39.07877499
YALI1_A16485g	YALI0A16511g	1.668464378	1.505554017	1.0877888	2.051655094	1.033497409	1.833806577	0.814082313	1.697387224	1.659975191	1.937095278	0.966427391	0.694117854	1.437366905	1.685146549	1.433263107	1.194124897
YALI1_A16496g	NA	27.29536088	29.26493564	33.58231702	42.09313869	36.26947301	37.57228781	34.06839819	44.87012526	35.79149165	31.23003026	33.72724104	40.00055913	34.12426908	38.9284806	42.89157659	34.39623698
YALI1_A16501g	YALI0A16566g	55.26880452	54.07560342	51.3033934	57.22920804	67.79642484	68.06276509	64.70363652	72.70949608	61.91516659	52.87490817	55.99338307	48.29624159	61.05113759	53.4486798	47.50986001	54.96716155
YALI1_A16509g	YALI0A16588g	24.5629825	22.90314929	25.1173056	24.01400548	25.59949567	26.29611436	25.29487848	26.02148007	17.37121706	16.34194311	17.85313722	18.83384446	20.56773042	16.96401924	19.29383332	18.73197098
YALI1_A16583r	YALI0A16599r	0	0	0	0	0	0	0	0	0	0	0	0.406144992	0	0.109072968	0	0
YALI1_A16593g	NA	0.125785073	0.06375803	0.113071774	0.132785926	0	0	0.111699666	0	0.50840187	0	0	0	0	0.051154377	0	0.112222633
YALI1_A16618g	YALI0A16610g	0.224616202	0.0910829	0.145377996	0.151755345	0.077915087	0.145723159	0.159570952	0.122095579	0	0	0	0	0	0.014615536	0.048437692	0.016031805
YALI1_A16628r	YALI0A16632r	0.197881396	0	0	0	0	0	0	0.336135085	0	0	0	0	0.816476066	0.643796545	0	0
YALI1_A16633r	YALI0A16676r	0	0	0	0	0	0	0	0	0	0	0	0	0	0	0	0.391262693
YALI1_A16642g	YALI0A16698g	42.80604303	43.74792251	48.72514369	49.59714551	46.21325544	41.31479452	49.47306984	49.26376577	44.58997892	46.99468446	46.45813267	47.21117952	40.8646636	45.30193192	49.19198281	43.70183999
YALI1_A16681g	YALI0A16720g	28.38587422	20.55581751	24.07059766	25.92878433	27.06320569	27.29669949	26.93748482	24.99491781	6.587793918	8.178726082	7.59663306	8.85171459	8.42308767	5.201536059	7.27897603	4.883278125
YALI1_A16712g	YALI0A16753g	0.313047095	0.15867754	0.125069744	0.146875751	0.452458673	0.094025018	0.154440053	0.132940886	0.11246961	0	0	0	0	0	0.023440105	0
YALI1_A16745g	YALI0A16775g	325.4953351	375.730906	316.2032678	295.4917274	289.0311201	305.4253563	324.0260951	314.3774857	304.9120931	277.2484315	260.0486585	268.8208348	200.0835602	291.4748156	267.3120907	287.0051269
YALI1_A16770g	YALI0A16797g	76.33782826	69.60100493	80.31275573	89.19186629	82.95421144	91.21310539	77.10735598	98.69149115	96.17581941	98.46786238	91.85972335	102.2077026	100.4794401	106.4444189	112.9642359	98.58501233
YALI1_A16787g	YALI0A16819g	21.38703276	16.42562761	20.10653156	20.8694248	19.56076973	21.32479194	21.3097599	21.67533089	14.47235856	14.09892382	11.96245182	14.75379325	16.17739769	13.53401841	14.03857581	13.89722941
YALI1_A16808g	NA	2.421063171	3.916564683	2.593112695	3.262739908	4.132096782	3.898904075	1.46379753	1.793787547	2.998118456	4.081736478	1.888835314	3.432247523	2.444244224	2.639565833	2.152248131	2.527681207
YALI1_A16809g	NA	2.734097525	3.856309842	2.244039832	3.262739908	2.319472206	2.249367735	1.372310185	2.524091295	3.074993289	3.767756749	1.634569022	1.350097365	4.169112222	3.722464636	1.762386807	4.083177335
YALI1_A16826g	NA	7.777557336	9.285402986	6.743039397	12.1697817	8.987249364	8.537746149	9.115345022	8.986501973	9.701940504	7.925123381	7.419193455	7.712308012	8.307792967	8.541660725	9.631145684	7.22074824
YALI1_A16832g	NA	10.26434785	8.785566687	7.403631415	12.58750226	10.52694804	11.63025363	13.4268076	11.95444057	8.744512164	7.630064212	7.606318346	6.980617056	7.734873644	8.998519885	13.00579561	9.870490665
YALI1_A16843g	NA	5.048174271	2.101889713	3.943692223	4.187182881	3.778448859	4.061358411	5.283394211	4.440717952	10.97922083	8.571646604	8.125926924	8.463610368	12.58431537	6.843318826	6.196391795	5.308130535
YALI1_A16863g	NA	1.65177644	0.426835193	2.329143139	0.752188542	0.421301339	0.087550241	1.207961659	0.935274068	1.780319842	2.90854276	3.191650989	2.697499924	3.674957145	2.265495625	2.750071737	0.895765088
YALI1_A16891g	YALI0A16841g	2.83814406	1.214556188	3.973317838	15.98742555	16.16453205	13.92914923	9.668146591	5.878147234	7.183663757	9.186101558	14.5546947	16.24026797	12.88627495	6.7171747	7.963989961	5.313319324
YALI1_A16918g	NA	4.385479579	4.890413199	4.205047613	5.555476059	4.595410775	8.693502328	5.192525023	3.166029109	31.19663799	24.90410838	16.75065101	32.5409954	31.5152406	22.65032843	30.34163232	27.19275716
YALI1_A16938g	NA	0.701135315	0.64309025	0.960412109	0.422947766	0.506688544	0.361009637	1.541731195	0.765641026	2.698923508	2.381012946	3.290158736	1.617894455	2.410788385	1.900921896	2.429957567	2.710661497
YALI1_A16944g	NA	11.26824614	12.99719243	10.53452032	9.622061672	9.663274382	9.747260186	12.5413903	10.12347579	16.19354105	8.465823806	5.623875979	7.583880258	7.542323662	7.006254989	7.154875058	11.12562713
YALI1_A16950g	NA	21.4072954	25.74213672	22.007338	27.16660281	23.3290073	22.4699998	25.7849861	23.98471257	45.28736826	37.59494125	30.40154997	19.91606786	26.89787294	32.32310441	31.53829137	37.1823115
YALI1_A16952g	NA	3.131386296	3.318773231	3.241390868	1.903264946	3.908740199	3.847602705	2.864998456	3.102861001	4.602374823	3.13291177	2.392110513	3.66421162	2.349159208	2.315408625	2.55785007	4.063640601
YALI1_A16988g	YALI0A16863g	23.56190268	27.03898343	28.44320487	25.72976299	25.21137429	27.68831097	30.25943957	23.28505771	28.25570493	26.69710765	30.67881733	29.92125157	23.46773344	27.93540507	32.05265903	28.33516272
YALI1_A16991g	NA	23.88393729	20.9804186	27.12532358	19.17289004	21.90951743	20.31534228	20.3751949	20.86573281	32.21662376	24.36152193	20.28944644	25.21839762	20.20276919	21.67222473	20.1430693	20.29280525
YALI1_A17008r	YALI0A16907r	0	0.180764524	0	0	0	0	0	0	0	0	0	0	0	0	0	0
YALI1_A17035r	YALI0A16951r	0	0	0	0	0	0	0	0	0	0	0	0	0	0	0	0
YALI1_A17037r	YALI0A16973r	0	0	0	0	0	0	0	0	0	0	0	0	0	0.122202122	0	0
YALI1_A17085g	YALI0A17020g	323.3672803	167.1970226	246.268584	336.8339432	291.5389541	360.2120806	313.8307255	311.2274514	109.6460245	90.72509089	91.53920147	130.2699405	167.7602156	81.7329523	127.3712677	97.47387741
YALI1_A17103g	NA	7.27037723	9.563704459	8.819598409	9.241900483	6.981191798	9.044550731	8.042375965	7.862955284	12.28298918	10.49860592	7.840862874	12.49541276	9.290105195	10.70149559	10.57879201	10.43670486
YALI1_A17118g	YALI0A17039g	13.87732805	25.62999929	17.50351069	16.63997353	16.81875069	19.13247928	17.67535518	17.71912089	30.48087097	29.95994575	27.62421647	32.94957622	33.41175583	28.13023016	31.82550139	27.16108352
YALI1_A17123g	YALI0A17061g	10.53532022	20.07324543	19.27922916	12.11469514	12.94982623	14.11233757	15.70400176	13.78153847	19.313966	23.60308485	26.40776546	22.86243137	18.82391487	23.37354672	29.66661238	23.624328
YALI1_A17126r	YALI0A17083r	0	0	0	0	0	0	0.711568244	0	0	0	0	0	0	0.325872325	0	0
YALI1_A17177g	YALI0A17127g	147.5926394	114.4399236	145.868504	158.3808177	155.5436086	173.5296905	161.7564719	175.2814974	131.454911	140.1756198	147.8259216	157.3649618	171.4296789	138.5397428	150.3203677	146.2113461
YALI1_A17234g	YALI0A17149g	4.144373126	2.824673923	3.423806804	4.861152893	5.922333636	5.991822279	4.865463382	4.229255193	3.053639169	1.731645779	1.895989993	2.316530697	2.672888941	2.120286167	1.78828046	1.71993735
YALI1_A17239g	NA	2.517283666	2.345012313	1.590116275	3.088316705	1.991245007	2.206926835	3.383305612	2.34026125	2.08988341	2.246238628	1.247344075	2.112039106	0.982509983	2.047461967	1.604688959	1.729922473
YALI1_A17289g	YALI0A17171g	12.66534826	8.277471295	9.661882531	11.14324373	11.01680512	12.95587786	14.26225859	13.37937258	8.837869946	7.59551603	6.616805204	8.190590679	10.95995631	5.974248647	8.908691407	7.806781434
YALI1_A17320g	NA	2.829196569	6.129925853	7.081192358	3.279471907	4.209412522	3.299072678	3.546894016	2.732749509	4.932801734	5.567907196	4.449660115	4.032290796	3.891171407	3.925508162	4.672995321	4.899812802
YALI1_A17328g	YALI0A17193g	5.026213367	13.07778651	12.45611108	4.73385741	5.552100519	6.69286333	6.152479059	4.900704251	6.116004579	9.29016053	10.6907986	10.02502553	10.65429083	7.381104196	8.306731171	8.162708324
YALI1_A17348g	YALI0A17215g	4.590327638	11.7600008	10.20398375	4.808248285	6.094548864	4.184267942	5.403471352	4.880961543	7.93909657	9.492722664	9.255836701	10.48072294	11.19521185	8.364413659	7.697530055	8.793972238
YALI1_A17383g	YALI0A17237g	1.936920147	2.111769336	0.854150296	2.083303522	3.961561013	1.284267389	1.687570632	1.862370064	2.481550749	3.571519418	0.33501302	0.664101947	0.980139062	1.605141385	1.723956382	1.434629874
YALI1_A17401g	YALI0A17259g	1.223086013	0.578628149	1.759146803	0.688618473	0.942811706	1.322492588	1.110261004	1.154232703	0	0	0	0.164634989	0	0.331603748	0.146530105	0.096996447
YALI1_A17419g	YALI0A17281g	42.53321986	27.60667245	37.14915795	27.87041886	24.84599205	26.06332615	38.28546529	23.83473804	18.35080234	13.04381005	13.86856799	17.82937275	18.69454089	12.05019185	15.04460685	15.26000109
YALI1_A17433g	YALI0A17292g	36.75497014	42.68165376	44.0902826	33.12329847	35.37854056	35.47227358	46.2569896	25.74902974	24.29583209	26.98932288	32.43249628	26.08423907	23.83862697	28.14537053	30.58847153	28.54216884
YALI1_A17450g	YALI0A17314g	33.50347339	36.81976664	37.71265904	32.15827456	34.81411608	32.08262712	41.11242221	32.49015547	32.93917276	32.56929625	32.3053229	35.66938583	24.97655283	32.76663113	37.97910363	31.72876896
YALI1_A17470g	YALI0A17336g	35.56754049	47.8272014	56.35947159	39.87888123	54.82468583	54.65610293	48.43320918	47.93474027	63.08867938	62.08086109	65.09250363	64.66707196	53.68935725	59.95453633	58.58614971	55.65831304
YALI1_A17486g	YALI0A17358g	21.36459468	22.76620719	21.49042146	17.88307743	21.5762459	21.55119227	22.99717407	25.10077541	27.21292186	26.1720943	23.42746051	25.48911819	28.36492286	21.78521667	23.80872424	24.46565619
YALI1_A17511g	YALI0A17380g	28.37549255	25.79591921	31.82456489	26.29966107	26.16190883	26.36190823	29.182384	25.61417252	49.48598929	48.16139822	49.39411667	49.05046918	39.98464736	52.09143178	52.658285	48.93204354
YALI1_A17512r	YALI0A17402r	0.676094768	0	0	0	0	0	0	0	0	0	0	1.365098446	0	0	0	0.402131101
YALI1_A17515g	YALI0A17424g	44.91968642	36.31473524	43.444224	47.11372303	49.35416692	49.18672885	48.279445	49.10575292	36.85302724	38.63314535	41.08151345	36.92578681	46.67596972	35.79596056	36.00469474	35.99110521
YALI1_A17546g	YALI0A17446g	1.51905548	2.379938029	1.448281026	2.283917935	2.245446498	1.55541386	1.14456509	2.384890346	5.95371041	4.620178311	5.169179623	4.565818634	4.700817522	4.455437363	4.404944355	3.737252447
YALI1_A17551g	NA	1.772618216	2.303861578	2.206324877	0.863666446	2.167872716	3.071615605	0.968689542	1.582753718	5.437763867	4.081736478	4.79153076	3.166110683	2.25045504	3.622933496	3.553047198	3.041327656
YALI1_A17570g	YALI0A17468g	581.2148769	488.8004006	526.1918204	683.7718556	628.3354462	619.3458131	577.6314229	562.6050026	449.0966499	530.3806099	588.9238801	507.0845023	594.4242249	574.523377	563.9673584	575.8202853
YALI1_A17583g	YALI0A17490g	67.44186876	73.86234247	68.39497616	42.73260191	51.65822475	49.37305662	50.25137847	54.66446081	87.53300619	65.54366289	64.69735533	51.83258222	72.78261859	58.8191359	61.61590895	66.35365245
YALI1_A17622g	YALI0A17512g	22.95277144	23.81870038	26.5401781	29.76730621	31.03340547	32.05886292	26.75349298	29.61128861	29.60323704	31.91618945	36.1798058	37.07937787	37.45562286	34.05936592	39.52550405	35.10835034
YALI1_A17640g	YALI0A17534g	0.201389931	0.116663629	0.206897289	0.121484997	0.228702884	0.518471287	0.136257749	0.268788871	0.310089084	0.05065985	0	0.101656267	0.118707513	0.109201896	0.051701225	0.102671771
YALI1_A17651g	YALI0A17556g	0.153078061	0.64660266	0.229343694	0.53865989	0.221249445	0.551731709	0.271872772	0.216690856	0.494972387	0.269548635	0.233877014	0.154539447	0.105268927	0.207513037	0.137544768	0.364194205
YALI1_A17671g	YALI0A17578g	17.74475266	20.63738064	23.60236069	17.19405857	17.33317559	16.60819575	20.3625961	19.16332588	16.44194682	20.11146857	21.79238013	22.16628303	20.89962941	17.89964479	19.78174194	18.25597116
YALI1_A17720g	YALI0A17600g	29.17208906	40.31280631	45.62880991	34.59662671	34.17256594	38.15273736	41.83516018	36.24789261	33.01182699	33.09467106	34.94939085	33.6105008	32.68319875	31.64094941	31.18685185	28.26815078
YALI1_A17724g	NA	9.69069168	7.539387015	10.12934646	8.088876021	4.071604374	6.904309299	9.873009383	7.082179493	20.40386172	19.6433568	14.80571431	22.29660796	13.9481328	14.54205251	22.27461103	19.50335841
YALI1_A17732r	YALI0A17622r	0.174476069	0.353754229	0	0.368373861	0	0	0.309876493	0.444565757	1.12832415	0.460841215	0.39985425	0	0.719903628	0.283824283	0	0.466990956
YALI1_A17749g	YALI0A17666g	2.243167139	1.774598494	2.054137236	2.168836799	2.999730851	2.805170809	1.787194659	2.056547408	10.87980002	13.73235373	8.215609996	6.650886617	4.498002515	9.617022802	5.70757475	6.695950429
YALI1_A17766r	YALI0A17688r	0	0	0	0	0	0	0.800514274	0	0	0	0	0	0	0	0.607489392	0
YALI1_A17781r	YALI0A17710r	0	0	0	0	0	0	0	0.336135085	0	0	0	0.599311513	0	0	0	0
YALI1_A17788r	YALI0A17754r	0.877095916	0	0	0	0	0	0	0	0	0	0	0	0	0	0	0
YALI1_A17824g	YALI0A17776g	6.599123784	4.409908835	6.361147393	6.173064196	6.196106422	6.954561401	6.887995034	6.308385089	7.627059291	7.592195437	6.87660093	7.293446872	7.763423206	6.496294545	7.467313821	6.665751235
YALI1_A17876t	NA	0.108500665	0.093494724	0.019506866	0.034361855	0.070569031	0.161313734	0.096350765	0.041469022	0.070166597	0.071645324	0.04973112	0.057506655	0	0.083837765	0.080429889	0.082281589
YALI1_A17927g	YALI0A17809g	28.13907964	26.59877649	27.98880169	26.43784413	29.14879637	30.50593034	28.85129944	33.37985826	34.63980814	35.95085758	38.3427928	37.73821644	40.96530107	35.98998465	40.94437033	39.48845066
YALI1_A17957g	YALI0A17831g	1069.461431	723.6997199	855.1013761	842.5056681	847.6548177	927.0513005	850.9070442	910.0136337	563.1119517	556.7326903	573.8126229	557.8927582	628.8536388	666.3814798	663.775389	654.7729516
YALI1_A17983g	NA	0.170802889	0.230871181	0	0.480824828	0.740603406	0	0.303352778	0.580275304	0.368189986	0.150379765	0	0	0.11745796	0.092616345	0	0.253977538
YALI1_A18010g	YALI0A17853g	83.40801786	92.7386566	89.00594721	74.16906969	84.29716746	70.9784546	81.30937844	80.26339881	83.92054786	78.09965422	81.32953841	76.01369615	79.3335635	75.15804585	69.12361435	70.93100219
YALI1_A18036g	YALI0A17853g	68.51610249	63.43375894	70.43755973	53.53137167	56.06074232	60.07552052	55.1597916	54.98794362	41.39236131	42.46935698	51.76623109	44.42632709	57.03947029	47.59790155	52.14661088	51.31838104
YALI1_A18062g	YALI0A17875g	5.44927319	3.922432196	4.516095142	5.773949837	4.677312711	6.023587756	4.605205713	8.430653997	27.80558362	21.13483401	17.87363473	20.62985855	27.68730481	20.39814295	20.13588433	25.86290363
YALI1_A18076g	YALI0A17897g	0.400648752	0.464185444	0	0.241684438	0.744521943	1.005669702	0.355784122	0.461815222	1.943224925	1.436166539	0.918183833	1.300093759	1.06271488	1.931957356	2.159962282	2.042570673
YALI1_A18133g	YALI0A17919g	211.603154	212.6795479	207.066448	230.3522381	224.7609493	232.1458523	186.7431454	235.0747972	351.8071117	416.6568276	456.2654473	393.2889636	454.1224696	477.0099514	409.2966295	440.1523379
YALI1_A18166g	YALI0A17941g	130.2923377	178.6880268	166.4614442	144.234785	153.410134	142.6543914	197.8684456	103.0748885	94.33301939	97.43243898	134.8234652	134.6602137	92.88506977	100.8767623	135.9791652	104.8330362
YALI1_A18188g	YALI0A17946g	577.9229001	527.5654742	501.2654136	450.766814	478.0010999	456.0774484	511.2962139	532.7379657	566.7948315	587.8797769	431.4427357	518.5612679	369.1905774	642.7200891	602.8646337	596.8663299
YALI1_A18196g	NA	62.97339843	47.39043266	50.82037825	52.33978602	51.23241619	50.12876667	44.94315854	54.79802202	54.96550503	59.86546835	32.61192222	38.5152776	39.32045056	39.3316258	40.00751565	43.14292242
YALI1_A18204g	NA	6.547444073	5.050307091	4.520887264	5.910138517	9.463265746	5.258390364	6.067055553	5.963940626	3.221662376	4.260760008	1.304787552	2.658349606	5.089844952	2.739900207	3.197312588	4.275288549
YALI1_A18219g	YALI0A17963g	0.901459691	1.058159581	1.023597116	0.400687357	1.337200595	1.410787659	0.589852623	1.007422403	2.147774918	3.0075953	1.08732296	2.442807746	2.447040842	2.431179057	1.08708628	2.158809069
YALI1_A18225r	NA	0	0	0	0	0	0	0	0	0	0	0	0	0	0.22369202	0	0
YALI1_A18273g	YALI0A17985g	132.6999097	136.9340567	143.2513427	125.6953437	132.8588994	128.0299217	136.0851874	125.672211	115.770003	122.900229	118.9272794	123.317075	104.3437381	116.9530708	121.2157993	108.4370417
YALI1_A18286g	YALI0A18007g	57.53481512	60.36431686	59.42743904	60.39876335	66.54682821	64.83590483	64.58727377	62.1695015	46.68972922	46.96195372	51.2509775	54.1431865	49.1014341	45.97520261	49.34079009	46.63565639
YALI1_A18315g	YALI0A18029g	49.12216416	52.55473353	53.24383033	42.87026288	45.43109511	50.17442129	48.97572577	44.73351832	71.29405546	65.18510851	61.0968554	54.55918053	62.37787915	54.18562284	53.85742017	58.24967885
YALI1_A18344g	YALI0A18062g	167.4585593	187.6913397	195.1534246	227.6949288	210.1948125	219.8601985	202.4670788	208.3598609	192.8956758	211.3383341	257.2550474	259.4063257	266.9694583	223.9907161	246.0045033	222.0713594
YALI1_A18374r	NA	0	0	0	0	0	0	0	0	0	0	0	0	0	0	0	0
YALI1_A18375r	NA	0	0	0	0	0	0	0	0	0	0	0	0	0	0	0	0
YALI1_A18377r	YALI0A18073r	0	0	0	0	0	0	0	0	0	0	0	0	0	0	0	0
YALI1_A18378r	YALI0A18084r	0	0	0	0	0	0	0	0	0	0	0	0	0	0	0	0
YALI1_A18414g	YALI0A18139g	46.60442187	56.88545569	43.27694835	33.12709798	38.48373555	37.9729171	33.12089175	43.44938921	67.03000573	63.48754981	65.53492796	53.97145981	64.66763655	60.56507017	55.38239196	66.07371097
YALI1_A18426g	NA	136.1293387	140.988573	142.877942	150.1506445	161.7289633	154.7498189	116.3202722	163.149764	152.2064593	130.1306085	139.2957602	165.2715228	197.317744	137.5536122	129.2689308	127.3760217
YALI1_A18439g	YALI0A18161g	44.90950741	40.86823635	54.86851796	47.54217775	47.66435264	57.15783272	49.89734052	55.56649666	44.67403624	37.93582802	48.55432229	56.71877949	57.15120942	43.05820258	45.25009065	39.7797253
YALI1_A18443g	NA	6.490509777	6.462331727	5.001003054	7.341164792	6.281903892	10.02575333	6.381242358	9.548637371	2.748275252	6.326691541	5.223810166	7.137514734	5.499549504	4.430699791	6.352603353	5.825156237
YALI1_A18451g	NA	71.00617696	56.36719892	61.3011841	50.70297816	48.87488745	67.95789802	64.63032045	57.80896005	22.38595114	25.60065119	22.60935871	22.34393137	30.17260087	19.70875822	25.48539496	19.37950203
YALI1_A18463g	NA	78.98503961	68.1047081	78.33361265	51.93194353	55.74608046	63.2411524	83.6346818	69.70979249	32.89602195	26.30452397	22.33154252	24.7667861	28.87042091	20.66961605	21.23320064	25.85128507
YALI1_A18466g	NA	61.46894553	53.73526745	61.89149858	43.12574454	41.93848308	44.03468131	66.22607503	44.8575566	22.83860824	26.05108282	17.93699124	21.48825555	29.79977549	16.5619817	21.26927564	16.06632023
YALI1_A18470g	NA	66.98538936	59.81662425	66.09717323	48.15393409	44.28083303	54.29155761	65.69815051	58.33863372	40.84849039	34.46641117	18.98329023	27.2065075	31.13457336	22.79625038	20.90103362	23.25048912
YALI1_A18489g	NA	0	0	0	0	0.145667337	0.181625966	0.238662641	0.114132824	0	0.177466803	0	0	0	0.054649396	0	0
YALI1_A18514g	YALI0A18183g	51.68589437	65.56688597	56.73920896	54.60449669	60.07267507	59.93223649	72.42524374	49.35223716	94.18401175	93.76385291	108.0567592	112.4740929	93.44481189	87.79987023	109.9098789	89.67597341
YALI1_A18557g	YALI0A18205g	1687.991588	2430.429272	1990.800075	1868.388143	2089.430776	1773.713612	2002.408178	1417.311724	1292.316281	1448.903487	1963.380273	1481.37864	1279.193038	1487.880728	1514.733328	1414.124437
YALI1_A18590g	NA	3.459089513	1.848982862	3.166009685	4.049970757	3.067906552	3.740227746	2.960041154	3.685760289	15.35373647	13.87078472	12.53961526	17.38119534	18.87863556	11.73992943	14.74927732	12.79338015
YALI1_A18605g	NA	11.38261043	11.21189711	14.07827974	8.010756937	11.02614773	7.419556261	7.598911619	12.13598164	15.1397524	16.63155311	11.65545299	10.26880025	11.32505111	10.44007382	12.83888028	7.418418523
YALI1_A18622g	YALI0A18227g	112.0814883	133.4814201	110.7475213	88.89833353	98.2885296	98.74177637	93.49339629	116.7602565	137.9689697	152.5832463	143.6240368	120.6974543	151.1435168	159.5501454	143.0890638	150.2964991
YALI1_A18660g	YALI0A18249g	32.10764257	55.34049135	47.26793466	42.76553583	42.58827365	43.31173874	50.39759431	34.26077149	42.78474358	42.6097795	51.80952082	45.43997264	47.41556565	43.46995133	54.19861877	46.11569532
YALI1_A18671g	NA	61.92095534	93.59239053	91.7648932	58.9355835	65.37031023	51.25714408	65.0348838	63.83862074	116.3924723	83.91018036	66.25171279	85.200972	60.53810282	75.74846011	82.03201579	62.89885086
YALI1_A18675g	NA	8.379766144	8.649540032	7.395849587	6.59441094	4.954741098	5.560056867	7.441400297	6.599609973	6.404431444	6.237583209	5.935864499	7.267707222	8.643913285	5.94831737	5.852433013	6.660650352
YALI1_A18692g	NA	2.093712831	1.20276438	2.4467273	2.652291796	1.36175465	3.395819678	2.107160154	1.86717618	1.241156565	1.843364861	0.55979595	0.845480328	1.295826531	0.567648566	1.31688023	0.653787339
YALI1_A18719g	NA	2.990725093	2.902865589	4.232875134	7.926538717	8.277332187	4.988303742	7.910964593	5.350479642	6.172596822	6.722860082	5.104021897	2.987156601	4.725955584	6.055474558	7.032583076	6.471945252
YALI1_A18728g	NA	7.094604842	7.619498565	5.051518236	5.487335299	7.61442896	9.304202905	7.859594693	7.696183823	9.31233763	9.276673814	6.278231016	7.552362834	9.129686924	5.884746338	7.195199029	6.768336456
YALI1_A18732g	NA	1.552078425	1.57343729	2.367624634	3.276925733	5.302291053	2.161348998	1.837702334	2.276949835	3.497804866	5.590204307	2.586883148	4.985576935	5.433707386	4.131494347	5.641727568	4.238112127
YALI1_A18752g	YALI0A18271g	18.09040405	17.59472361	17.13735357	18.08101699	16.64833789	20.24662378	18.54030591	17.79879077	17.30909609	16.97574045	17.73880156	17.57774913	20.80165978	18.35294831	21.18713002	19.36186783
YALI1_A18805g	YALI0A18293g	37.7912454	37.24592134	39.9043767	36.18175693	41.13290852	35.68103275	39.56946206	34.13251497	33.02978947	33.2354864	32.40166084	33.50503285	28.01189779	32.08280579	35.71282196	31.66626153
YALI1_A18817g	YALI0A18315g	25.18784431	20.96514036	23.8814239	24.07070373	26.09658898	27.16332067	27.4529307	24.70318252	21.26116683	20.16858024	26.12773114	24.04982263	29.8107152	22.10420734	27.94451202	27.34491488
YALI1_A18847g	YALI0A18337g	137.8692452	129.5312382	131.9894362	148.1882087	149.0011764	156.0536356	133.8459867	168.9463489	137.5803247	133.8129275	132.1358354	144.7823412	136.5801164	149.4140904	143.6590913	149.8018778
YALI1_A18897g	YALI0A18359g	22.07281719	24.88194566	24.14539986	23.46531874	20.48261509	21.26327907	20.51657472	23.96476403	30.59437676	28.23645117	23.59348876	26.11151754	30.1250534	28.31388067	27.8461717	28.27307126
YALI1_A18915g	YALI0A18381g	48.73605886	47.10902024	47.35517706	48.30063485	49.4734831	58.26695534	33.96213575	73.71057068	39.21612969	37.59732823	37.17332833	32.84036834	50.41991708	40.55713851	40.32958146	51.0234154
YALI1_A19010g	NA	6.527811557	3.15125894	6.482781736	3.281491286	4.178308489	5.209742513	3.202057097	4.013015034	1.608186145	2.46311684	0	0.564868323	1.539104309	1.011327905	2.178582646	2.495986145
YALI1_A19025g	YALI0A18403g	53.30057244	52.18026277	66.34909781	58.531506	54.1647679	72.08244908	60.50106456	74.19618573	37.39807057	37.661443	36.1431736	38.83812185	44.76136883	34.19637238	43.36486328	39.36180833
YALI1_A19070g	YALI0A18425g	14.31193869	11.03825814	13.71217598	14.81980458	14.75659221	18.34456271	15.36267843	15.89780468	5.796923794	7.678097926	4.990690217	5.076939166	6.122551177	4.465183151	6.443482986	4.446033748
YALI1_A19089g	NA	1.765358562	3.46507181	1.620695434	1.268843297	3.583011849	2.335281086	2.935219006	2.743547011	2.429031157	3.174683927	0.860797344	1.820131262	0.852385893	1.130369628	1.518723479	1.373947929
YALI1_A19096g	NA	4.004273987	5.69524765	5.050122789	5.173515765	4.599788191	4.038919967	2.547492939	3.756294096	2.415611095	1.815357936	0.684833246	1.402808348	1.726177761	0.437497099	1.409643892	0.933121892
YALI1_A19123g	NA	0.256035889	0.324449145	0.345236897	0.067571537	0.138771841	0.259542431	0.1136825	0.108730087	0.620912106	0.84533004	0.293384183	0.193860134	0.066026664	0.41649954	0.258812049	0.628181128
YALI1_A19195g	NA	9.871929206	9.662685456	8.22814605	4.072720794	6.724126497	6.441371242	6.381722187	5.204217325	25.07167823	18.58189124	13.34898034	12.19997073	16.77677512	15.5666703	16.72082689	16.36645461
YALI1_A19214g	YALI0A18469g	1.999716921	2.046542954	2.739203551	3.57867423	3.055423677	3.758186586	3.517752868	3.218927413	18.16641612	18.46123418	18.59322262	17.41942525	25.5388347	16.20296867	16.27387075	11.63914666
YALI1_A19220g	YALI0A18469g	0.476419111	1.136412551	1.108454908	1.420052602	0.668333816	1.66662998	0.995458165	1.475743325	11.68955512	12.43554948	16.76280174	10.77932659	22.83735733	10.07502675	12.61563462	9.901176128
YALI1_A19249g	NA	1.505045745	2.002556551	2.283066612	1.191609358	1.427539899	1.779934469	1.670638486	1.078555185	1.520784724	1.118040861	1.185654776	1.353228025	1.552487825	1.453673937	1.71153533	1.007076149
YALI1_A19398g	YALI0A18524g	43.10764001	35.10559239	34.75004624	31.78966856	33.8757484	33.41290541	31.35708167	42.19992612	23.89641462	23.55272265	23.52535875	18.81622183	19.2006729	21.40188513	19.24263695	19.40373133
YALI1_A19419g	YALI0A18546g	0.508515723	0.468648765	0.332450345	0.195206661	0.200448215	0.249929748	0.656832225	0.353372781	0.597915362	0.732619368	1.589164327	0.560040388	1.716693268	0.413607182	0.498452834	0.412442155
YALI1_A19428g	YALI0A18568g	25.06392701	21.20554862	22.44039832	25.35330652	26.53174051	25.59625354	25.78632718	25.52813714	23.79806228	20.95544019	24.19913678	25.41907452	24.68486526	20.14098421	21.50222399	21.35028149
YALI1_A19441g	NA	28.0670693	33.56601786	31.27504162	41.04879532	30.1078637	32.20547453	24.01542823	32.46731811	96.66231014	94.2108906	70.01772123	79.47086632	72.53029056	83.05120425	85.70526013	93.77262543
YALI1_A19459g	YALI0A18590g	64.59412194	72.38487081	70.96449576	78.27225943	77.31600481	76.76717956	67.40100063	82.104388	58.17704192	58.17103085	70.32590569	65.33972236	69.47143926	65.28453893	77.8085386	73.90954949
YALI1_A19483g	YALI0A18612g	117.7746764	100.5391123	105.5926376	126.2256935	122.1406718	123.3846886	114.6140895	140.7610571	117.0830102	121.1590252	101.6713369	115.9187414	111.5850624	127.0920725	116.8883787	122.462734
YALI1_A19515g	YALI0A18634g	81.69567178	57.67064398	68.03092409	75.37378777	80.12147972	93.30891001	85.32095447	93.09772873	55.56552218	52.02607027	48.16669483	51.49753273	62.75561482	47.51738099	55.37720226	52.28337592
YALI1_A19526g	YALI0A18656g	95.89015413	127.9836183	135.3846046	118.9761901	109.1720228	127.961125	131.2098745	123.6421229	122.5587441	185.7190098	150.8597391	142.478182	109.8550614	187.7706651	131.161198	152.9220411
YALI1_A19549g	YALI0A18678g	50.24190481	51.28543828	53.25991784	50.75955228	54.05895276	53.38637001	59.70808303	54.26217365	42.67963735	37.09137598	41.33722583	40.35180912	40.74390352	33.88250026	42.83636206	39.3793337
YALI1_A19563g	YALI0A18700g	13.6065222	11.2200253	12.62157914	12.11874823	13.40139497	16.35152627	13.51398791	16.96285506	20.1778131	15.70496702	16.64536121	18.73249378	22.43846561	14.29914461	17.15847588	17.20136302
YALI1_A19595g	YALI0A18722g	28.97079769	23.64209693	27.3615383	27.27756239	30.57362779	26.93321894	24.38489636	30.22267209	29.10117004	23.19318683	18.36739401	22.71479601	21.41348971	22.2279228	22.31232292	21.54901723
YALI1_A19650g	YALI0A18744g	31.38829189	23.44027014	25.81754721	28.0103143	29.11010558	30.10878753	29.10333297	30.5472196	33.65812229	28.5336484	28.96733875	24.39515553	32.30252211	27.32057358	28.47176696	27.23652375
YALI1_A19675g	YALI0A18744g	29.1769999	20.37162046	22.54601046	25.45089415	24.57443663	27.3309991	25.87052899	29.54641776	20.16237577	20.95402525	20.74109782	21.41786897	28.21526607	19.47077636	21.36774822	22.92288046
YALI1_A19725g	YALI0A18766g	60.27525064	41.78090131	57.25834814	52.84849278	53.05169158	56.96757019	52.78967404	59.48713227	54.76401858	51.54838165	46.16888536	52.80477585	57.6694228	46.28363131	50.95352266	52.69214622
YALI1_A19731g	YALI0A18788g	49.04571939	37.1345181	46.96115741	50.82591992	45.51928959	55.60417354	46.83271256	61.06699214	53.80649498	50.51707116	46.51696105	51.33009126	60.08989903	44.493338	52.65617021	51.71916324
YALI1_A19759g	YALI0A18810g	602.5728839	428.6434269	443.4537661	609.0293717	546.5273341	569.622782	553.4243623	592.0853945	507.5357344	497.6413453	510.1970251	552.4669474	682.6566307	547.3893153	584.0899825	605.9415628
YALI1_A19795g	YALI0A18832g	7.419343636	7.674552925	6.516723002	7.05503446	7.121683714	7.450785273	8.231466151	9.348035986	7.538898794	7.005912437	6.057128952	7.418702552	8.607434133	5.428077498	6.615591281	8.000514054
YALI1_A19798g	NA	6.065896988	3.792113095	6.361608246	9.178361796	6.794632496	7.242123223	7.900402558	10.60448599	5.066913591	3.871927594	4.517979329	6.047258539	10.4285105	4.851538447	7.358002352	9.515849983
YALI1_A19821r	YALI0A18854r	0.360583876	1.462184148	0.648278174	0.761305978	0	1.462089028	3.202057097	0.918769232	1.165934955	1.904810356	1.6527309	1.092078757	0.743900416	0.879855278	0.485991513	0.482557321
YALI1_A19829g	YALI0A18898g	78.121381	61.36730753	72.56845227	76.40655097	74.15771918	79.65111869	75.06741532	84.30540273	65.63045377	68.35385565	68.74338599	68.23163706	81.60698593	61.16776403	69.09058455	68.40172863
YALI1_A19862g	YALI0A18920g	0.528386675	0.17530627	0.24180891	0.730204668	0.79146782	0.779088292	0.307124482	0.391660063	0.186383918	0.253749159	0.264202098	0.160029303	0.118918361	0.09376788	0.129482641	0.119996492
YALI1_A19885g	YALI0A18942g	98.22536186	103.7407924	99.37376389	86.5934661	102.087097	94.52757405	109.4178869	91.82779111	88.84798456	85.48727763	93.19811411	80.72330814	60.4468814	92.52595741	89.23271985	88.22799368
YALI1_A19898g	YALI0A18964g	49.27378672	43.50911706	49.10707165	50.58878227	57.81026755	51.10001153	54.65911465	50.04995389	22.99806699	20.2862303	20.45254489	17.93739359	22.76335273	20.74258817	26.02484554	22.80083344
YALI1_A19924g	YALI0A18986g	112.7696994	84.08541504	99.21095813	108.5474976	107.8896354	110.6785673	100.5893528	112.2528537	89.41968891	89.24958202	88.58993049	82.08204852	92.58760554	85.91991771	86.6162294	90.47517377
YALI1_A19965g	YALI0A19008g	30.71992246	24.97769523	29.5823881	30.99774816	30.33495423	31.73765435	28.68692249	36.3393078	31.29226903	32.21518042	26.05794108	29.52582794	35.69781343	26.21486615	29.51284606	30.63145737
YALI1_A19974g	YALI0A19030g	82.8662569	100.5596457	102.6542372	97.49744016	85.40228587	88.13914046	103.130405	94.56388977	112.193741	112.1322323	105.1277179	106.4004091	77.26739227	133.3893803	106.3221056	131.8838264
YALI1_A19989g	YALI0A19052g	49.85935406	38.02207973	49.57378862	48.37429747	49.20311717	56.77399154	49.94567234	55.41262982	45.04689674	46.70815596	45.31666657	47.51089849	53.71739697	40.73984682	46.1989594	46.91768344
YALI1_A20063g	YALI0A19074g	117.5599915	97.77684083	104.077917	119.1838513	116.4935307	128.9670101	138.4638028	118.7793466	90.35800931	86.00314318	83.53476831	99.02122805	117.1680475	78.1688147	94.58305068	91.93120449
YALI1_A20089g	YALI0A19096g	57.63600242	39.23799102	45.02849353	57.24342086	57.92155461	59.69420808	47.81670614	77.43703093	72.46248615	64.01436715	56.88499745	61.50768414	60.55444151	64.64414413	62.89256416	68.24958803
YALI1_A20113g	YALI0A19118g	0.270437907	0.109663811	0	0.34258769	0	0.292417806	0.384246852	0.137815385	0.174890243	0.142860777	0	0.081905907	0.111585062	0.263956583	0.291594908	0.048255732
YALI1_A20129g	YALI0A19140g	61.00913404	79.47475048	73.35975425	53.99146997	58.22675056	55.57058681	67.2800043	51.65876809	42.28189407	36.67307295	38.42124419	40.41946665	30.26905141	38.1439175	46.81159634	34.3151873
YALI1_A20131g	YALI0A19162g	7.904324524	15.15880176	13.00218936	6.537768854	8.789144629	8.508201688	8.882542569	9.092527894	15.57873542	14.55511868	14.05288138	14.69987367	16.4960968	12.65102645	13.82467384	14.62212298
YALI1_A20149g	YALI0A19184g	43.88569619	36.8666552	41.32114538	32.40192518	41.78856392	38.3550726	36.81064013	40.24906403	35.73638034	32.3662898	22.50670128	22.06354237	23.34516753	24.45234654	24.1612854	26.52103653
YALI1_A20176g	YALI0A19206g	70.08395344	47.38605172	63.34852489	69.43723656	70.56718884	74.11842813	71.49828163	80.35633805	59.23575578	49.21825418	53.88013655	58.26863168	59.16254986	50.16356096	57.76449464	55.98528565
YALI1_A20201g	YALI0A19228g	0.427007222	0.456932546	0.255899279	0.901546553	0.900038862	1.186344167	0.589852623	1.037645075	0.153412494	0.375949412	0.489295332	0.179618217	0.146822451	0.289426078	0.367690948	0.402131101
YALI1_A20221g	YALI0A19250g	9.351591189	11.81191984	10.58753372	10.67251372	12.4385611	11.95633551	12.7034882	11.05528398	36.20391485	33.04489929	33.24769404	31.99688695	27.53126773	34.70083432	29.0232315	35.80845918
YALI1_A20229g	YALI0A19272g	18.93065352	39.62326649	31.68033075	22.17804521	24.68678021	23.4703765	37.31239165	19.53593524	23.93234908	34.13620665	34.90306703	36.55589945	23.60905004	38.01900963	38.29101555	30.90906632
YALI1_A20242g	NA	3.739769919	2.161943705	2.389368126	3.980542687	4.355453365	4.344493112	3.842468517	4.541345059	2.798243893	3.591928101	1.841614431	2.012545138	2.996855962	2.237346277	2.37441568	2.261125735
YALI1_A20247g	YALI0A19316g	2.046557137	1.259651885	2.628154758	3.857969485	2.852323929	2.37095518	2.985701888	2.669397092	2.599719833	1.54444083	1.005039061	2.102989499	1.055534374	0.713396171	1.083629726	1.760682119
YALI1_A20258g	YALI0A19338g	3.751235489	1.503455475	2.509463898	2.486523559	2.458723674	2.122387299	2.401542823	2.852630275	1.833526744	1.382523646	0.999635625	0.858690958	1.619783164	0.851472849	0.58789296	0.661570521
YALI1_A20283g	YALI0A19360g	11.83586152	11.05403425	13.43766658	11.92667625	11.8511892	12.20571657	13.20635272	13.47147426	22.24181424	21.82242771	20.40961204	21.03657926	22.7728662	18.06594496	21.31284274	19.22515225
YALI1_A20320g	YALI0A19404g	32.70699315	35.17643619	36.79240038	26.66105816	30.13512605	28.41640772	36.11352299	26.84065759	33.73219074	29.93547728	26.17379278	25.85980847	25.16663101	25.30766524	26.06325455	26.95575575
YALI1_A20353g	YALI0A19404g	10.02470158	9.332140279	12.78079363	11.73576724	12.75751687	15.04951573	16.08329656	12.36747182	5.782201855	8.236598528	10.84099951	12.96621195	14.19347455	7.344068889	11.39784657	10.27202637
YALI1_A20370g	YALI0A19426g	409.8771477	1075.246292	1352.357691	1808.084629	1437.224491	1281.327618	1044.100358	946.9091143	1041.498848	1298.943995	1588.289217	1315.930416	1440.748297	1241.97688	1252.158224	1216.477237
YALI1_A20398g	YALI0A19448g	77.7841964	69.02714621	79.10520712	101.3580283	84.26808636	98.77710671	74.11356566	105.461723	61.30520948	66.59698307	60.3848415	65.08625698	66.353687	72.24421975	72.80506697	79.4411282
YALI1_A20408g	YALI0A19470g	370.8497345	326.8484896	321.41163	338.267623	318.1410086	313.6272473	302.9083665	374.4208241	320.8834617	316.499209	287.7165437	299.9761117	356.6221348	343.2047443	311.2643837	342.9110045
YALI1_A20441g	YALI0A19492g	71.53726549	90.83166261	74.72563591	78.10183654	70.49692145	77.71699416	76.50629279	84.05644696	92.96249241	90.90367281	88.46537272	87.80508222	71.53399536	97.38636243	97.54543947	93.69654657
YALI1_A20453g	YALI0A19514g	80.13453624	74.59384832	77.19599139	78.59250028	71.65801359	82.88497868	79.94760647	80.18064591	88.48968794	89.39769083	84.48388072	90.13842882	108.0052003	78.70650794	90.38944546	87.42851674
YALI1_A20484g	YALI0A19536g	209.9399459	91.62083365	162.291177	199.4686732	168.8108054	199.7771789	171.9805709	220.8710762	457.6045568	358.9427892	337.7503916	406.0526165	520.0308976	354.2733515	347.1516302	359.7045515
YALI1_A20528g	YALI0A19558g	5.995470895	4.749000634	3.856705745	4.161375899	5.485486246	5.278389203	3.077231143	11.64033899	6.728828004	5.375439396	4.285895384	4.622824909	6.562714687	5.152372855	5.646562414	7.082960005
YALI1_A20558g	YALI0A19580g	10.75190588	10.03935193	9.864247873	8.138297419	9.921502796	9.499698991	10.60393131	11.14503996	8.976550016	10.43024473	8.26991959	9.066157992	9.381943457	7.691229228	8.610782159	8.315790686
YALI1_A20602g	YALI0A19602g	166.1048278	143.2436264	166.1156934	122.0714759	120.9013779	119.8913003	159.7936907	133.8234908	162.9494612	164.5362049	131.3921065	127.7167278	106.1981973	163.8351207	132.0723833	142.9368066
YALI1_A20611g	YALI0A19624g	21.05781334	16.23284477	22.48474693	21.12398407	16.17569561	20.28431813	23.46487691	22.07951355	14.93134093	10.89807506	9.798799801	11.94596032	11.20261101	11.77197674	12.41871594	10.52852338
YALI1_A20631g	YALI0A19646g	66.06232044	63.33297619	58.72194154	52.14060713	58.30385963	58.32488479	39.70550801	83.68634473	68.08517843	60.42235642	57.15374065	49.34672152	72.52164056	65.35483155	64.61426702	79.43117955
YALI1_A20685g	YALI0A19668g	34.82216259	28.8998745	38.55445619	38.27779938	37.21367338	41.92859676	39.27571733	33.99111653	34.44743506	33.61735996	34.53886662	35.6151534	41.16730457	31.73992491	35.1046297	34.62817283
YALI1_A20739g	YALI0A19690g	1328.543919	1184.570115	1424.209447	1382.487812	1386.272571	1531.136374	1350.99986	1148.533694	1108.767516	956.4940381	1160.892029	840.4146394	1220.483528	792.5837686	877.0365695	880.2755074
YALI1_A20760g	NA	4.86241894	3.267760028	3.143166902	1.614891469	4.856313581	5.907430416	4.075345397	5.893115778	4.593077096	3.751899187	3.255379045	3.888462242	3.944926448	3.554970819	5.9644413	5.507977507
YALI1_A20793g	YALI0A19712g	23.53634565	21.58071147	24.9581894	25.93694927	25.72992545	29.99277332	23.48346529	29.7457069	20.29625135	23.11455264	21.94577266	20.99578381	26.95594204	22.1164264	26.70223034	22.29988007
YALI1_A20822g	YALI0A19734g	37.21594384	43.78244581	47.64476236	39.6225157	41.2194421	42.42273467	42.53641758	38.93458628	49.6184819	56.38671566	58.17424957	54.61945034	51.58695783	51.00827661	56.92451732	53.46515777
YALI1_A20839g	NA	0.608485292	0.411239292	0.607760788	1.284703839	0.952755424	1.736230721	1.0206557	0.689076924	0.437225608	0.357151942	0.154943522	0.30714715	0.278962656	0.274954774	0.091123409	0.422237656
YALI1_A20849g	YALI0A19756g	137.0496103	149.564567	154.6891457	149.7723108	151.4486491	125.4022512	159.8319116	145.0241895	149.8674854	130.2230926	145.1224863	132.8135781	127.2069711	150.4214119	140.4141634	143.3566442
YALI1_A20855g	YALI0A19778g	52.20776032	60.29777166	56.04072932	60.47150805	60.83555836	56.40476155	52.64424678	61.83912024	70.31527159	73.07791391	83.67439733	73.15892527	80.48931989	78.59623487	70.88335935	77.2244181
YALI1_A20884g	YALI0A19800g	31.4553091	25.37689129	27.22768329	25.58701812	29.27890706	26.72881504	30.91986385	33.92268272	26.5614557	28.30429139	18.86437379	22.37055079	24.65332472	19.65926636	19.31816266	22.16747695
YALI1_A20902g	YALI0A19822g	138.2905941	160.3122454	150.4245466	113.011643	121.2288534	116.8227184	127.5604672	120.7897969	150.4919748	130.9380749	140.2678836	140.3927913	111.5024068	138.0503793	140.1455527	134.8896651
YALI1_A20937g	YALI0A19844g	228.0731055	212.1478045	242.0648818	168.049461	191.3798366	196.5903109	269.1889688	209.2945972	111.6739388	97.67176311	118.2713758	124.517714	175.2560326	88.05358971	125.6298315	116.7639403
YALI1_A20965g	YALI0A19866g	2.235620034	2.120167015	4.797258485	1.06582837	2.814292944	1.55956163	4.354797652	1.531282053	0.932747964	0.380962071	0.16527309	0.109207876	0.148780083	0	0	0.321704881
YALI1_A20995g	YALI0A19888g	1238.434951	735.5061313	807.5783734	1048.966921	987.9910088	1056.25286	1121.940185	963.8156841	313.401618	236.8645548	231.3923547	268.1424444	392.4706649	217.4438456	327.7257819	282.19062
YALI1_A21000g	YALI0A19910g	961.5757844	373.4281235	609.5840701	577.3633517	528.3313836	566.7117993	773.7971104	466.3232376	91.75665195	55.1105288	42.82466785	61.82758381	78.34201256	39.37963378	68.79817361	51.97544482
YALI1_A21012g	NA	3.399790835	1.096638111	3.472918787	5.872931834	2.680278994	5.848356112	5.900933794	6.037626379	1.249216023	3.265389182	1.062469864	3.39324471	2.072294016	1.885404166	4.165641543	2.757470408
YALI1_A21021g	YALI0A19932g	5.591075838	2.957226367	5.189867401	6.800429807	5.797232655	8.296123136	5.828463481	8.000518589	3.144094261	2.247248173	1.601663372	2.300727719	3.886670713	1.458187117	4.791657899	2.467006531
YALI1_A21040g	YALI0A19954g	18.392022	25.5616788	21.04214113	19.54597818	22.26035653	19.47429784	28.49963682	15.41130547	16.291643	14.93813931	17.1273669	17.85956598	11.82986865	15.85382383	20.22107842	16.21873155
YALI1_A21043g	YALI0A19976g	140.9696448	140.3885858	134.9648094	148.8484448	158.9778988	163.6867486	145.3623506	167.754589	166.447266	169.2982308	140.7670801	150.6315527	139.9943628	162.3686952	149.8194527	172.3617099
YALI1_A21057g	YALI0A19998g	15.64287009	20.28559409	20.61485382	19.60439639	18.72412644	21.31230579	20.87792874	18.72270163	15.70838778	16.02863352	18.5307454	14.60600293	20.60724136	13.79652101	20.12063655	19.5066014
YALI1_A21089g	YALI0A20020g	16.86947811	14.7156979	15.16445295	13.76523512	14.26161965	17.4660365	16.48626695	17.90358421	17.20541853	13.5910793	10.25139842	13.23776548	16.25522936	10.80795199	15.24962559	13.0029635
YALI1_A21106g	YALI0A20064g	14.72994287	15.04398221	15.03051045	14.17304404	14.94051457	10.68735127	19.6512032	16.5914799	17.08952885	14.10478227	10.97975414	12.84717015	17.304181	13.06384105	14.28370996	15.65249383
YALI1_A21120g	YALI0A20086g	23.30917202	19.58282342	24.41567147	24.22337204	25.45757416	27.50119838	25.99072319	27.44375627	23.16727898	21.86202795	17.27855032	18.65043592	21.39921327	18.55885212	22.09052333	19.98121549
YALI1_A21156g	YALI0A20108g	84.28775798	60.36169547	69.46034341	77.91524571	76.20382451	80.60128182	75.78806529	90.49746793	70.35244914	75.67978824	64.96215647	73.58770067	77.14542345	73.05540563	73.93128688	74.8715708
YALI1_A21175g	YALI0A20130g	9.553400406	4.789913589	5.569976262	5.709794838	6.334854806	7.170398298	7.618687576	7.401196587	2.613302486	4.625186067	1.567244819	2.102565423	1.68873945	1.651835579	2.108756279	1.525324866
YALI1_A21203g	YALI0A20152g	308.5622738	181.5632043	218.845792	306.7033569	221.0176976	262.4302382	152.8440991	253.7514191	72.94354631	53.00931312	24.30573112	52.17493707	75.74018115	14.98258898	71.8350801	15.98793118
YALI1_A21236g	YALI0A20174g	23.69612149	11.93323957	17.51501858	20.96069064	17.73504133	21.97459249	18.92813633	23.02903234	18.33760421	15.41881993	12.99691932	15.70267089	23.12253778	12.20864276	18.72936525	14.21402572
YALI1_A21265g	YALI0A20207g	71.49765958	57.17002078	56.95062597	77.56702422	72.56981804	77.40795873	62.78448558	96.80013941	143.2120105	127.2269559	122.1773522	137.5401076	122.1119551	133.5221886	128.6593759	136.6638754
YALI1_A21277r	YALI0A20229r	0	1.084587143	0.641154238	0.376469989	1.159736103	0.482007372	1.266747863	1.060118344	0	0	0	0.540038946	0	0.290062179	0	0
YALI1_A21283g	YALI0A20273g	3.885602117	3.789388876	3.157561794	2.723637768	3.622323892	3.865292833	3.574710294	3.597192753	3.56816301	3.325207734	2.137152026	1.882894409	1.971977396	2.597848557	2.482327342	2.558385799
YALI1_A21311g	YALI0A20295g	78.59908998	77.16344528	73.81531023	85.12785032	91.62442368	85.99741828	88.68242679	89.0579721	80.52900748	77.53443974	82.09189504	76.76817264	92.26055841	89.74523832	81.77911738	83.50435102
YALI1_A21345g	YALI0A20328g	52.29193193	65.32661437	63.8344879	49.54628424	57.10228122	47.63580381	73.04047177	39.75776265	33.77920425	29.58984636	38.6525775	28.88724455	24.26675147	31.46310438	42.46546812	34.46004098
YALI1_A21372g	YALI0A20350g	79.88816511	38.07134697	33.70078924	136.1487796	191.7499595	136.9562797	108.2773218	149.1423009	70.32153961	70.96129328	54.17010531	27.40791687	51.89538126	79.14757848	62.99755662	82.36605265
YALI1_A21409g	YALI0A20372g	33.43991116	28.37283563	31.60635206	29.86661915	32.31105561	31.50793462	32.66759973	36.97228653	32.36774652	29.6710844	19.81000068	22.26787454	28.81226238	22.36509282	28.36438413	26.72071138
YALI1_A21420g	YALI0A20394g	154.2006332	107.3877698	132.2242841	128.7038031	121.3184458	152.2779516	143.60924	171.6191583	168.1806176	169.5460916	132.296431	149.3881319	142.3937683	154.3343629	146.5768744	157.7871392
YALI1_A21449g	YALI0A20416g	51.94986652	44.78053617	53.12302073	51.92546172	46.25751262	53.40202209	46.12649628	53.31051833	52.99371864	52.25083616	43.8585427	46.43047514	53.87444418	41.74620743	48.92538152	47.46257017
YALI1_A21477g	YALI0A20438g	3.039105757	1.799003581	1.719401836	6.730602953	5.828553657	8.100375361	3.208347976	7.860982325	5.153936443	4.546845939	2.143030243	2.622920001	3.332206186	2.255817559	2.320155948	3.138044664
YALI1_A21499g	YALI0A20460g	0	0	0	0.135143073	0	0	0	0	0	0.338132016	0.146692092	0	0	0	0	0.028553688
YALI1_A21509g	YALI0A20482g	14.12494082	16.15965585	17.07877671	10.10699316	13.34363034	15.15867015	13.95655231	13.93994696	20.74560127	21.24848794	15.58696211	14.63008956	17.82795825	14.74516086	16.59074477	15.05356977
YALI1_A21550g	YALI0A20504g	18.7813672	20.40189267	20.5735414	18.88717698	18.64742936	18.6874224	19.11036624	21.57449618	20.27390081	20.39784976	21.22495972	18.84183652	22.60130563	19.13358319	18.98307615	20.94667608
YALI1_A21554g	YALI0A20518g	42.66604143	58.72858921	50.24978534	43.06982299	47.14297824	41.85879248	37.49820164	44.00298325	64.18560705	65.2663447	73.68075699	79.12027443	58.05821775	76.88684571	72.93573143	68.24389327
YALI1_A21565g	YALI0A20526g	103.7156239	137.4428891	137.5551833	106.1794961	114.3888937	111.3511511	135.5678876	94.99526243	74.12566603	82.68895289	102.48847	95.00542764	65.3991922	82.9452972	97.15807159	77.24112886
YALI1_A21594g	YALI0A20548g	1.444152049	1.339721622	0.514376888	1.409470766	1.41777982	1.767765072	0.725907151	1.214997095	6.167414121	6.405344649	3.340847726	2.702688612	4.159846155	3.479528428	3.213419956	5.03220985
YALI1_A21617g	YALI0A20570g	75.89323735	69.44798134	65.58448274	63.22201856	75.61007856	83.2514415	57.4249041	90.42776033	53.84633358	55.34165105	42.15245844	44.59608679	48.15405847	50.86229641	49.25838273	55.04502442
YALI1_A21620g	YALI0A20592g	41.97375124	45.17967756	40.22271396	34.82502968	34.69410722	40.23765672	34.21702336	54.19599496	43.28894865	37.42716217	32.88388133	34.38694269	34.30549026	39.57530867	41.63059534	38.96351264
YALI1_A21630g	YALI0A20614g	49.01823932	65.94258116	52.55777501	41.63295751	51.39122995	46.40800801	55.67301297	40.07061355	25.66709036	28.19620593	30.23594232	31.2535697	20.69067149	24.95298065	32.27318137	24.33300177
YALI1_A21654g	YALI0A20636g	18.30703404	44.8893823	42.04692856	17.85515146	19.2315294	19.14366286	19.40684324	15.99319894	35.33215714	33.11991686	35.9733891	38.87075599	34.47965876	30.45843214	32.84132752	30.94012072
YALI1_A21696g	YALI0A20658g	69.41806578	59.75183336	55.65406962	57.86404245	58.31152046	66.51432266	60.73839123	72.92369624	61.1199236	61.12764053	44.59255069	54.87867465	59.25470924	50.7715231	63.48455178	53.22293643
YALI1_A21711g	YALI0A20680g	280.6313362	299.3611152	277.6999292	304.3759864	268.1245441	296.8228174	310.3532264	370.4819135	329.3766249	331.6934188	282.3150426	384.9052581	253.212257	379.4939895	352.3438472	345.0903511
YALI1_A21720g	YALI0A20702g	134.3498716	118.1010836	112.1680553	114.8650977	137.9659679	133.0252267	123.481975	133.5949514	76.50208374	76.23742395	96.70350317	84.35224578	97.19923772	83.59456759	94.25846743	94.71441716
YALI1_A21746g	YALI0A20724g	131.9606656	136.326651	137.4740257	124.0470127	133.9332184	129.5093799	137.194644	139.7082707	125.4574107	132.2580974	126.0456216	138.2926961	120.4043155	134.7238641	143.1449943	130.3369883
YALI1_A21775g	YALI0A20746g	2080.519572	3065.103521	2818.811185	2428.618215	2265.730706	2355.465481	2314.692507	2391.159854	2044.419029	2391.645962	1892.008978	2607.917732	1297.367421	2510.329556	2603.782751	2144.802034
YALI1_A21797g	YALI0A20768g	21.72603167	22.39978476	20.64469452	22.33484416	24.58683898	23.98379478	25.61645678	23.44745452	14.78567357	16.79477901	15.78436214	15.97638876	18.89084653	15.58481825	17.88356783	17.68869424
YALI1_A21835g	YALI0A20790g	571.0793611	550.674378	485.9078826	396.0360791	394.0574269	389.7396766	400.5212244	512.537468	477.3722345	346.5478429	399.4241662	380.7076616	508.6898412	321.8274768	358.9322888	438.3477744
YALI1_A21841g	YALI0A20790g	532.1048556	398.45753	446.9177166	301.4617356	313.7556322	333.7119417	341.6681465	385.7278797	300.740317	258.6938389	281.4946903	278.5354249	374.4885169	230.6053123	296.9638007	343.169987
YALI1_A21852g	NA	23.66331689	19.3780939	17.34880794	12.71727032	8.661412942	9.470349386	13.97261279	16.80930071	25.04110302	20.29272397	22.3963818	17.2188554	22.82421731	21.34648884	20.21282885	20.7280304
YALI1_A21871g	YALI0A20812g	49.8180914	38.35990776	40.0102971	27.57982701	31.60564161	33.00912652	21.43217358	55.06039331	105.5421489	88.31659061	123.0676153	119.9109175	166.3735562	103.3605039	120.677954	129.4319392
YALI1_A21913g	YALI0A20834g	15.81847125	15.42691311	13.2614047	15.22611957	15.82109128	16.70958889	10.90224202	19.82767197	27.73722245	28.08083521	30.41483948	27.8003382	37.18026087	29.96279646	30.40339765	32.98113333
YALI1_A21919g	YALI0A20867g	263.4837897	298.0750509	296.7609104	273.4583885	276.7178664	272.3140815	279.479546	301.1020057	297.3914896	288.5915244	322.5592103	257.7842156	280.3574693	294.6925991	269.8880103	303.6233432
YALI1_A21945g	YALI0A20900g	16.625637	21.26386578	19.96342979	16.97357952	21.68315591	21.33288806	20.36878375	20.69811583	35.3149159	38.22615005	40.40966843	38.40243238	47.5355948	36.9030793	40.57990132	41.5556987
YALI1_A21970g	YALI0A20922g	20.55859669	25.0987322	28.83802539	25.2521639	25.75734942	27.7329909	27.35516592	24.61714612	28.96216805	30.81861473	34.96317702	34.43267973	34.07868122	28.56827394	30.98643679	29.36841487
YALI1_A21993g	YALI0A20944g	48.78699849	46.78989275	56.04364811	57.70699317	64.25968888	64.67307134	58.27743917	65.81450262	101.0865606	93.57380876	108.5431018	111.637751	90.19792544	107.6063005	112.5556345	108.8810169
YALI1_A22008g	YALI0A20966g	95.54156727	78.52569249	86.52384237	88.77272267	100.8283786	86.2312361	100.6895035	103.6800899	127.5294548	100.9410452	92.55896226	96.49352814	82.58923597	100.2200117	99.71694482	97.28637385
YALI1_A22023g	YALI0A20988g	21.44793718	19.13943873	23.69884833	20.82818243	20.13369952	25.47161388	27.09665298	24.29826804	11.87933728	15.36427221	11.18711718	11.56470193	8.140797005	12.32627441	13.06675295	13.56623413
YALI1_A22027g	YALI0A21010g	87.22768436	79.73860165	99.30193211	84.67916074	91.62352027	90.69908207	109.0056217	98.68983059	95.15214931	85.35326067	77.73437707	70.73060934	78.58236174	91.86285611	88.46692972	100.3964597
YALI1_A22073g	YALI0A21076g	49.1265682	39.1085843	47.68708486	56.93409114	57.38858955	55.65943772	52.26138885	64.56736973	108.2543581	111.1664985	115.7458892	118.7726052	145.6148116	118.8969996	122.2381303	132.6872847
YALI1_A22093g	YALI0A21098g	144.1024292	122.3249966	134.9597289	130.806209	121.5973542	126.8916053	141.5891429	139.0125689	92.10886146	80.34836413	60.24955371	66.07076481	65.46323661	75.90751441	82.2651089	80.74792511
YALI1_A22105g	YALI0A21120g	35.54619464	32.08912655	26.44680277	23.87732387	21.36481859	27.24802279	29.29154504	34.7322611	46.37241299	35.01171309	29.81488981	26.21609517	41.21039236	27.46214958	33.24623762	33.21237322
YALI1_A22111g	YALI0A21131g	20.97640152	21.62926459	21.85247644	20.52155045	17.71914146	20.50161737	17.82990465	26.6731252	16.8114053	17.05367575	13.1501882	16.45674031	14.32900432	12.27252011	14.80839454	13.84458736
YALI1_A22129g	YALI0A21153g	40.98990243	29.29743974	37.3236625	35.54627179	38.16769842	42.57259228	34.46920287	50.10444951	51.52403736	53.15261252	39.79921836	51.63284124	47.36895296	46.23553224	47.99166194	49.62770884
YALI1_A22137g	YALI0A21175g	12.51636223	10.25887265	11.02843345	9.538944178	10.31270334	10.97187352	12.13411111	13.57875409	8.848436757	7.688771855	6.43975792	8.621674399	9.680809319	7.185235799	6.770051557	8.389451564
YALI1_A22157g	YALI0A21197g	50.19638856	63.00540976	57.99524525	45.67835871	51.30854222	48.07012128	63.35926504	35.95097734	19.62796975	19.03439989	23.89920222	23.9235958	17.30772623	16.85017805	26.96728448	19.17731398
YALI1_A22192g	YALI0A21241g	43.48566559	31.89183277	40.98646061	52.54594557	53.20493159	65.07183057	58.60263942	47.53874421	35.97828748	33.27640969	39.89325755	33.95475373	46.02642089	33.05938028	36.12087704	41.68224766
YALI1_A22228g	YALI0A21263g	33.72519786	52.58452575	47.34767913	42.21131061	45.01355649	43.36328559	44.31233854	35.40835501	35.80769877	42.64136657	48.42940592	51.1795353	38.07019776	39.35974985	46.15997192	36.04071379
YALI1_A22236g	YALI0A21285g	19.99264712	19.66687754	21.95709294	11.36744543	12.74356394	15.88936934	16.64631053	14.7674324	9.982319822	9.360968704	8.942858979	8.882489892	10.16494062	9.079785057	9.004157833	9.629111847
YALI1_A22275g	YALI0A21307g	104.8228597	211.2170696	195.3613288	131.4442353	158.4872003	159.687536	184.0015414	113.0118056	75.42141742	78.42461389	100.6487294	101.1026037	101.2401972	78.91965785	103.437725	94.11543313
YALI1_A22330g	YALI0A21330g	163.3129887	187.2270018	174.0910125	248.902707	248.299875	265.3052809	235.211301	285.4874685	200.0201035	242.0311217	206.2704439	213.1143982	264.0124243	267.6724769	273.2640631	270.8880031
YALI1_A22369g	YALI0A21351g	408.6347167	299.3575608	387.3279987	813.100447	918.3343547	775.7285831	687.9745597	509.7104585	504.2341172	748.0126063	266.8510453	272.5902201	197.342571	291.1431228	274.8036282	221.4883885
YALI1_A22393g	YALI0A21373g	12.32598904	8.720752819	11.84980832	10.96051069	6.864847737	11.20445109	12.76800154	7.698732129	6.283744922	7.358406842	3.612753475	4.054136592	8.915590413	3.603427393	21.24686516	2.073299044
YALI1_A22415g	YALI0A21395g	0.212703972	0.261837751	0.16389055	0.898169975	0.889348191	0.657118664	0.215869018	0.787147797	2.456323642	3.089966238	1.532025834	1.840582175	1.911991238	0.914456328	1.904376857	1.233503265
YALI1_A22440g	YALI0A21417g	57.14799925	67.38027163	80.05418287	100.3772336	94.30246313	89.60926591	77.76424379	88.56986864	82.15432437	84.03575102	70.7618818	75.8489994	67.63867648	71.81787897	76.90101005	76.50628681
YALI1_A22454g	YALI0A21439g	172.5727365	817.8921077	1336.695716	2215.737168	1842.36845	1756.662729	800.2739054	1144.779073	4886.564682	5311.586659	5424.468851	5520.545952	5956.877314	4332.331904	4901.393793	4828.807512
YALI1_A22496g	YALI0A21461g	55.73528263	58.56301702	61.6776577	59.17767498	61.85387223	71.77307894	68.80181624	58.38900158	4.430166759	6.693642354	3.324615966	6.305669976	3.676395268	3.306740861	8.09851752	2.948073702
YALI1_A22497g	NA	0.0961557	0	0	0	0	0	0	0	0	0	0	0	0	0	0	0
YALI1_A22539g	NA	0.025196078	0.025542813	0	0.070929128	0.018208417	0	0	0.078466316	0.325882441	0.133100103	0	0.241647862	0.034653746	0.444026344	0.294311631	0.1723419
YALI1_A22551g	NA	3.673525158	3.948645759	2.920570612	3.507723791	3.241719688	3.992051953	4.9506207	3.370911003	3.16354365	3.169266378	2.707545501	2.655652268	3.541778431	3.198108774	3.25929462	3.162150365
YALI1_B00037g	NA	0.17929585	0.121175482	0.053724711	0.063091656	0.453500244	0.121167599	0.265363848	0.253803655	0.096624444	0	0	0	0	0.036458092	0.04027554	0.079981876
YALI1_B00049g	YALI0B00110g	17.50470819	18.46838274	17.28250677	14.482116	16.20350483	14.88672465	20.04196647	16.3499161	13.51424607	14.54582454	10.47981639	8.972419789	11.31066769	12.53793771	12.85668458	11.27429378
YALI1_B00082g	YALI0B00132g	0.703025168	0.448311178	0.509652652	0.885796264	0.983330868	1.593891603	0.644439164	1.011223997	1.649907956	2.366038021	0.883535387	1.236315574	1.239834027	1.125181802	0.978096128	1.274679717
YALI1_B00101g	NA	0.764281043	1.787996921	1.162672811	1.861889621	1.784424874	2.065995366	1.983883202	1.19839465	0.950490453	1.55283453	1.347334973	1.869591351	1.698033558	0.812909767	1.030090708	0.734326359
YALI1_B00121g	NA	2.665928186	2.676628565	2.166047926	2.489578792	3.334470312	2.494559479	3.141354593	3.200452062	4.558750417	4.739457048	3.583527899	3.260709085	4.019177603	2.877251856	3.178522694	3.567722376
YALI1_B00133g	YALI0B00154g	9.857564944	11.62561967	13.3057858	14.75393552	12.84513478	14.87201244	11.45774248	17.38472697	28.56985654	24.01914968	29.6166854	21.82073395	30.11093096	26.06823127	28.70039576	34.82885094
YALI1_B00165r	YALI0B00176r	0	0	0	0	0	0	0	0	0	0	0	0	0	0	0	0
YALI1_B00198g	YALI0B00198g	27.3201902	26.62479102	30.11765283	30.58573468	30.47877378	35.02860587	32.80343864	28.82891632	18.73323347	20.57023408	19.7979939	21.91270252	21.0535744	19.02091945	24.57227632	20.0372499
YALI1_B00214g	YALI0B00220g	43.27006518	49.93006533	46.98064114	48.29248164	47.27220979	44.81390948	49.4197005	55.29219652	33.29235957	33.66694931	30.64521512	39.15694435	31.37825731	37.05992832	36.41423159	34.0464539
YALI1_B00242g	YALI0B00264g	131.2238482	112.5715637	131.4973341	130.806209	122.1481312	136.8493177	148.750107	118.7439628	81.41670795	79.16868044	78.78643324	76.60063783	82.75892128	83.21964501	91.23386137	80.17031862
YALI1_B00273g	YALI0B00286g	39.12956756	36.85082205	39.85234186	34.18001324	34.14756309	36.5522257	35.24471122	39.60212205	49.54218443	39.23745126	41.50349234	31.67499119	45.46129353	38.10683547	40.15714358	43.38855916
YALI1_B00280g	YALI0B00308g	50.23654567	46.97997669	57.06144484	51.34247519	53.75299522	50.12041188	54.25565546	52.99460927	58.76312174	49.88698324	50.67272939	45.76902071	55.34619095	44.92541048	53.74094155	49.27875366
YALI1_B00297r	YALI0B00330r	0	0	0	0	0	0.541514455	0	0	0	0.529113988	0	0	0	0.325872325	0	0
YALI1_B00298r	YALI0B00352r	0	0	0	0	0	0	0	0	0	0	0	0	0	0.110906127	0	0
YALI1_B00329g	YALI0B00374g	0.235766381	0.14059463	0.224403983	0.614900983	0.120268929	0.487363009	0.443361752	0.388710059	0.358749217	0.439571621	0.254266292	0.126009087	0.057223109	0.315845484	0.037383963	0.16085244
YALI1_B00336g	NA	0	0.031512589	0	0	0.067392072	0	0	0.026401415	0	0	0	0	0	0	0.16758328	0
YALI1_B00357g	YALI0B00396g	1.016473514	0.434873734	1.290967742	1.575115817	1.940891685	1.487297459	0.894367672	0.871246685	0.361841883	0.344836358	0.384687365	0.197703913	0.423253685	0.204793901	0.163393698	0.141439215
YALI1_B00383g	NA	0.295023172	0.299083121	0.265204707	0.311443355	0	0	0.08732883	0.334097902	0	0	0	0	0	0	0	0
YALI1_B00419g	YALI0B00418g	0.667747919	0	0.960412109	0.281965177	0	0	0.237189415	0.28357075	0	0	0	0	0	0	0	0
YALI1_B00429g	YALI0B00440g	1.755159929	1.289094469	1.159172893	1.815034121	1.902598706	2.420677199	1.717659767	2.007906268	0.868660149	0.756878287	0.205223208	0.732271352	0.702025227	0.640954176	0.506911678	0.383489262
YALI1_B00448g	YALI0B00462g	101.3714453	75.52394584	74.31539209	93.0238108	102.1122713	106.1170698	76.96623373	123.5755794	138.465414	133.2672063	111.860929	128.5185384	134.4179182	135.2429615	128.166959	133.0378834
YALI1_B00483r	YALI0B00484r	0	0	0.572010153	0	0	0	0	0.270226245	0	0	0	0	0	0	0.428816041	0
YALI1_B00525g	YALI0B00528g	38.0655212	43.49879542	44.76056581	33.81528982	36.29183052	35.81881534	36.82883794	36.98863832	46.80719456	47.281215	48.05756354	52.05928833	53.48138428	46.89714053	48.25313796	49.80178958
YALI1_B00539g	YALI0B00550g	55.50217976	54.85299476	56.62460509	58.15206435	57.32317839	58.42732692	52.83394211	64.64955035	74.19382244	68.07865476	64.64720481	53.77437803	68.19564006	70.59146574	72.64638526	75.57590049
YALI1_B00578g	YALI0B00572g	69.48957599	68.42721365	90.34822012	97.43804	107.3230293	90.02863261	87.42602811	91.55440998	58.5163588	76.32288072	80.50695595	77.74048653	64.27605307	77.90636371	68.77944962	73.0281097
YALI1_B00607g	NA	64.04081167	43.01760838	64.96148297	53.33066107	57.24088096	63.90987091	64.32173458	59.1753688	21.18515834	20.10360415	20.19057852	23.76960078	27.49363909	16.7580683	24.38725455	23.38164341
YALI1_B00611g	YALI0B00594g	36.12204684	29.16531875	35.11983649	32.34350367	31.6593169	33.4086421	30.64768395	33.18807647	16.7171254	16.01553979	13.55218496	14.05724327	17.80013921	14.15757042	16.89632538	14.61667952
YALI1_B00675g	YALI0B00616g	54.65595945	55.00848289	62.87748896	65.59489731	64.39483854	68.24734208	60.55144243	69.06341596	71.11215147	80.21995819	89.56260796	94.10849867	87.14982501	87.99298417	95.54675524	85.33903545
YALI1_B00704g	NA	7.278807507	7.64146769	5.793124105	4.009004887	6.985833548	5.910572666	7.715595027	7.501653034	8.558458714	8.358875234	4.021938227	3.136821962	3.264456613	6.037304831	4.420454723	5.929294747
YALI1_B00711g	NA	6.016483782	6.160888265	4.47967502	3.207749909	6.456009093	7.721144305	8.095088167	8.258599834	6.484694414	8.18640406	3.899702123	4.233339003	5.892694307	3.954405742	5.160246968	5.964191613
YALI1_B00719g	NA	2.135036111	2.885889766	2.81489207	3.005155178	6.480279804	7.31044514	9.732568283	4.956518223	2.761424894	2.819620593	2.120279773	3.12535697	5.872898021	3.473112938	5.851082036	4.127134986
YALI1_B00731g	NA	4.043931325	3.433399694	4.816646243	3.415204389	2.301407781	4.782534204	5.027528901	5.838907266	2.615181208	3.604898104	2.664449348	3.674283669	5.839965883	1.973507165	5.791020369	5.186363735
YALI1_B00798g	NA	1.124173262	1.096638111	1.449092388	4.567835871	4.184651272	3.726893601	3.842468517	2.756307695	12.34519364	13.837887	11.4232871	11.17774728	12.16495974	12.31797389	12.03543689	12.22478548
YALI1_B00819g	NA	8.245058151	7.890444947	3.794799065	24.37107553	21.59340622	19.6133894	12.18343676	24.87399627	138.8457907	124.5676285	121.8385157	146.931206	120.7023785	153.330877	135.7516538	156.772281
YALI1_B00829g	YALI0B00814g	11.0925379	11.1987197	6.015801696	23.61338882	26.23493422	25.58655799	19.21234258	25.30508477	125.0168815	110.4144308	127.7890131	124.5941548	145.580681	122.4900218	113.7343698	143.0496195
YALI1_B00858g	NA	0.180291938	0.091386509	0.48620863	0.570979484	0.58631103	1.096566771	0.880565702	0.344538462	2.040386172	2.142911651	1.6527309	0.682549223	1.022863072	2.236298831	1.822468175	1.849803065
YALI1_B00908g	YALI0B00792g	580.0601273	502.244476	493.6241863	489.9743369	513.8446738	465.0284599	475.6782518	552.186918	642.9418296	581.5153056	501.7940705	538.8701565	470.3430796	540.1615116	492.984197	514.7046652
YALI1_B00977g	YALI0B00770g	246.4904347	178.1639598	214.7069125	226.6540299	207.503121	257.4548071	246.001517	237.8147605	232.0464025	179.8182385	135.4520759	160.7848562	179.102111	141.2869055	179.2357831	149.6976734
YALI1_B01011g	NA	3.704628868	4.356507565	3.330196097	3.597952912	4.658361608	3.004292523	3.158193301	5.663645948	5.749816218	5.088192048	6.961845914	7.2929917	9.477087492	4.459540448	6.590843811	7.006996722
YALI1_B01014g	NA	4.10791758	3.435670032	3.138815208	2.096000637	3.265529787	3.70149121	2.918330519	5.902220063	3.874150959	3.435892099	5.020954632	4.354491247	5.508629663	3.285535531	5.167504699	4.367449175
YALI1_B01030g	YALI0B00748g	31.39360527	20.69408966	23.66605863	33.26127475	29.10363185	29.32985821	15.33515297	45.97997223	30.07901473	24.14002884	15.15833009	19.73636308	35.12240669	21.45309781	33.13378887	21.91856749
YALI1_B01060g	NA	94.15440153	65.58534724	66.93629492	85.03713866	126.7114905	89.14484559	70.32090441	173.5849441	158.2502007	97.08984826	73.77116808	70.2959433	127.8353142	69.87588516	105.0307873	123.8251457
YALI1_B01065g	NA	49.5201857	44.7184652	46.6760285	52.02257519	71.39965431	57.83374377	46.85676886	102.2385984	106.2944034	76.35114845	44.21055157	43.31912404	68.81078848	47.60994669	64.87986703	77.10193646
YALI1_B01069g	NA	21.84306175	22.98722195	23.43774935	30.59864413	24.204122	18.18238919	21.92177551	21.20236688	21.74917128	13.55345831	21.13588555	27.09195378	25.17816793	20.41715452	17.75738222	19.98282241
YALI1_B01084g	YALI0B00726g	96.46917629	104.5914648	104.4998261	102.4143028	107.800126	94.55123282	110.4848116	97.2121393	68.34327663	72.58315544	77.48069139	89.97847743	61.96669027	74.93983496	93.63389806	77.30651728
YALI1_B01127g	NA	7.344524221	4.44427024	3.582589907	4.808248285	4.073318734	2.770273948	3.539115739	4.593846158	5.338754795	7.368608484	2.870532615	5.259221383	4.111028615	4.908666286	5.908633662	5.739892349
YALI1_B01136g	YALI0B00704g	520.2241927	572.9494303	561.6619695	569.9413393	534.9539461	486.3205216	560.4456085	500.7046652	533.4620041	540.2734829	585.3716541	584.9921343	495.4496113	559.3197654	554.5371078	539.5610178
YALI1_B01223g	YALI0B00682g	0	0	0	0	0	0	0	0	0	0	0	0	0	0	0	0
YALI1_B01268g	NA	0.488743206	0	0.468634824	0.137585418	0.211919649	0	0	0.221390176	0	0	0	0	0	0	0	0
YALI1_B01275g	NA	6.156777891	4.491549711	4.655189013	6.560189814	10.10450924	8.243693455	7.051338502	8.014795424	10.41899322	13.52617992	11.2086803	10.97887687	9.496601055	9.313361716	10.77970538	13.09065074
YALI1_B01281g	NA	4.355103963	3.311277414	3.725494699	4.894109861	7.385996091	5.506569066	4.304063761	6.2345055	11.81076968	10.85370836	9.900287371	7.871476756	10.50638575	9.912655239	11.21883006	8.46042057
YALI1_B01292g	NA	9.357151595	6.524996762	8.071063262	11.41958968	9.498238685	9.795996487	8.357369024	8.45267693	6.121158515	8.428785827	4.46237343	6.716284357	4.909742746	4.223305333	5.686100706	6.707546767
YALI1_B01317g	YALI0B00660g	1.470802654	1.362781279	2.331526765	1.435796363	2.331529242	2.265810482	3.145880657	1.625308144	9.102474651	9.816456881	16.27360031	13.57913718	17.35767637	13.23641931	12.98108911	16.33922158
YALI1_B01325g	YALI0B00638g	48.83226327	48.95983624	50.82776744	21.3003694	27.52751077	30.17502887	39.17410279	31.60305513	53.83146496	49.44401351	35.95568819	24.68795063	39.09434101	48.54804298	41.72288843	55.16896469
YALI1_B01334g	NA	10.20132866	10.89697364	10.70889894	8.528554316	9.351289844	10.36417539	7.174229193	12.03703993	24.79456614	13.74356839	15.84738806	13.06347374	22.59950631	19.15634275	17.90171271	17.5308799
YALI1_B01344g	NA	0.159081122	0.322540621	0.286005077	0	0	0	0.847603349	0.135113122	1.543149205	1.68071502	0.729145985	5.299793969	1.31276544	1.746771507	2.251284216	1.987000735
YALI1_B01352g	NA	0.976581332	2.208507307	0.675289764	2.537686595	2.28009845	3.452154649	2.268123777	3.190170943	1.70032181	1.785759709	1.205116281	1.137582039	2.78962656	1.833031828	2.227461103	3.41811436
YALI1_B01357g	NA	2.678623082	1.827730185	0.926111677	1.848885948	3.462027034	2.784931482	2.012721604	2.318798537	1.832183501	0.952405178	1.298574278	0.936067506	1.168986368	1.424527592	1.249692463	1.700440085
YALI1_B01428g	YALI0B00836g	120.2318826	147.1298167	136.8461056	137.466004	141.3151814	130.7998244	152.2487526	107.0452831	99.60730029	108.5895931	139.8250434	130.5416784	103.945546	106.5549801	129.5082236	105.7073679
YALI1_B01464g	YALI0B00858g	244.6344709	295.7624741	230.9673779	244.8342854	261.9443714	245.0922923	184.1062453	302.1576405	420.7885553	407.3680419	419.0698021	449.1892362	409.3409921	475.2376204	387.2950414	441.7576441
YALI1_B01485g	NA	3.035527532	1.454724025	1.984525021	3.379266333	3.709314679	3.879011707	4.21495271	3.421946628	6.424539549	3.935960175	5.312349321	5.014647354	3.18814464	5.970446527	3.124231157	3.988483983
YALI1_B01511g	YALI0B00880g	32.35945494	25.26420158	32.60359421	33.86566784	37.70151476	37.21909935	31.18285552	41.28926787	37.41627752	37.05528236	35.45833161	32.11388221	45.05655015	38.03367521	37.49077389	40.97169133
YALI1_B01550g	NA	1.588822706	0.548319056	1.884058442	1.42744871	1.319199817	0.365522257	1.0206557	0.631653847	0.655838412	0.625015898	0.464830566	0.30714715	0.209221992	0.329945729	0.683425566	0.331758158
YALI1_B01552g	YALI0B00902g	24.26531909	23.84812331	23.9774119	23.1259727	24.41624015	23.43348168	21.53712376	25.28713033	22.16075001	24.03844577	25.24376648	24.72137187	28.27840622	24.92923287	25.08182228	27.85171024
YALI1_B01568g	NA	47.46896953	61.39730478	62.18352481	39.66804835	49.52785279	44.43981124	46.89328354	48.71894741	77.08977829	64.66329894	49.25573011	52.91552662	39.93570654	62.05295116	52.85157708	73.27251959
YALI1_B01578g	YALI0B00924g	287.6226959	148.1155525	236.3343215	323.7959605	283.6557919	302.4118319	281.9228879	261.0642066	162.3822702	138.5207025	129.3680342	152.0961586	179.5248282	133.3426242	140.5838109	137.6815446
YALI1_B01628g	YALI0B00946g	305.1965159	465.6673964	389.0611307	361.4875538	455.3909585	347.2178091	411.7249696	254.406488	197.9039013	200.64187	313.7546262	258.7020288	193.7384833	218.6252799	250.3703953	207.9578906
YALI1_B01644g	YALI0B00968g	59.21395466	56.31831264	59.92667816	45.67835871	51.23746189	48.0023205	51.05930805	53.47495216	54.25811765	48.59561361	45.22608501	41.38057459	48.98091293	48.85140246	51.79030043	50.42627109
YALI1_B01698g	YALI0B00990g	104.8220699	146.0561397	133.6695066	113.3776707	119.983712	111.9340743	143.2097592	80.56404033	55.13673714	56.92178612	74.21842966	76.47102886	54.14135037	57.8278714	81.49441802	59.69579823
YALI1_B01711g	YALI0B01012g	30.0646397	23.56605303	31.50011232	33.40837405	31.31150394	34.53018768	33.97927611	31.37499184	29.39644515	26.52043143	23.93382912	31.80388934	32.16973607	24.71082907	30.32276836	27.87538569
YALI1_B01719g	NA	89.05583182	68.92243013	100.1815922	68.38475213	85.35597784	87.89535203	85.5619443	92.46450813	106.7643927	71.59650555	87.63317329	69.04858421	94.32830275	66.39838084	68.66042892	77.71417327
YALI1_B01725g	NA	39.93274632	30.68253439	35.3794365	30.00679415	31.56099799	32.81923244	41.49048452	37.38608841	40.74570562	39.51468293	31.64803851	31.80388934	40.24184697	31.54374772	32.18401245	37.98855509
YALI1_B01752g	YALI0B01034g	209.253484	277.7742426	253.0452686	225.9551295	241.6945851	212.2822891	245.9057479	200.0663892	163.1380645	174.2082529	201.841077	208.1818605	143.9234085	200.1530652	210.756256	187.1830629
YALI1_B01760g	NA	5.289884342	3.072996905	4.808656782	4.266659879	5.283242248	5.623419338	5.911490026	5.30059172	11.72341191	9.733371602	7.900416939	6.030434895	9.073950129	10.63561325	10.73453782	12.0374189
YALI1_B01771g	NA	12.2408737	6.1758041	10.95248914	7.572991049	11.10905109	9.388150601	9.606171292	8.607417011	11.41388956	12.18076096	8.220161581	12.1565609	9.631552755	10.18779795	8.671111738	9.39716889
YALI1_B01813g	YALI0B01056g	40.26577907	35.87074709	43.97914129	46.27301429	47.32327214	48.96658818	48.92940864	43.14760036	32.04353541	34.68885591	34.61650448	36.91689569	41.77176589	35.34269199	37.68660323	35.61710451
YALI1_B01822g	NA	1.555944125	0.976458592	1.998117658	1.720760088	2.409497383	1.602289346	2.500236364	1.699093784	0.718727027	0	0.50940336	0.448799489	0.3057125	0.24105624	0.399445079	0.462726199
YALI1_B01826g	NA	2.995619897	2.530703334	2.543245143	2.45960393	2.706050907	2.249367735	4.285830269	2.826982251	1.345309564	1.428607767	0.286049579	0.630045437	1.802527931	0.879855278	0.72898727	1.373432376
YALI1_B01839g	YALI0B01078g	28.42132451	38.87201243	39.22904913	31.84139172	34.98473312	32.25623093	37.29143233	23.21740991	18.33744447	19.45237699	21.52467889	23.06369194	20.10253495	20.38606247	24.81932403	20.36636633
YALI1_B01878g	YALI0B01100g	4.693313948	3.829529912	2.77833503	3.202318798	1.3029134	2.243417027	3.151230794	2.941033783	0.370138081	0.151175425	0	0.173345834	0.53135744	0.442255298	0.038570755	0.102128534
YALI1_B01889g	NA	43.72553955	38.09374492	34.80230195	32.69608834	29.74757015	30.31910932	41.35709535	35.83200003	44.73508328	37.44456148	23.87761221	26.03745668	36.05959385	29.08153234	29.85011032	29.66457639
YALI1_B01892g	NA	45.79415231	43.13443238	37.76220361	32.92648357	31.85623263	28.6325768	40.10576514	43.67982055	37.45566044	31.78652282	25.61732895	27.98451815	35.61423242	26.72560406	31.16420579	27.8274722
YALI1_B01903g	YALI0B01144g	40.40865764	35.02166871	32.18387449	33.59569608	36.16215126	40.37252284	38.73456166	42.70795041	40.73250182	32.5353898	30.46889385	36.93692184	37.72295013	34.22920854	43.31595327	39.75649674
YALI1_B01962g	YALI0B01166g	41.59685223	23.92485664	34.80414296	34.81331745	34.73576497	41.70635249	39.46132236	44.40167132	18.3068564	14.36316083	12.50695191	13.25815038	17.86163769	14.24226169	16.34976845	18.38230947
YALI1_B02011g	YALI0B01188g	26.81031916	24.6546338	28.01820955	22.14085912	23.2837186	25.19210951	26.71068492	26.42287772	27.3030092	25.540218	22.91826482	20.56486437	30.10388374	23.35730917	29.7363872	26.90517439
YALI1_B02021g	NA	30.9282625	30.30708962	28.11169898	26.26505626	25.26467529	30.5709524	28.2945409	30.61172031	47.69733908	33.50734582	28.05886323	34.69832051	34.38848741	24.23601356	33.53341442	32.19973399
YALI1_B02035g	NA	1.194705615	0.858812979	1.327798669	1.192406954	2.495942537	1.644116176	1.543160047	1.937164042	2.247585456	2.639195072	1.493431536	1.776272677	2.195850626	1.855116549	3.015489511	2.267438016
YALI1_B02047g	YALI0B01210g	2.363392147	1.597277249	2.050532049	3.252100538	4.053193642	4.926604333	2.568606672	3.425411374	3.231667539	3.944199705	3.368337432	2.385954676	3.177748516	2.649129477	2.709930939	3.31495899
YALI1_B02073g	NA	0.135218954	0.548319056	0.121552158	0.142744871	0.146577757	0	0.600385706	0.401961539	4.80948169	3.035791506	2.169209306	2.35479482	2.371182576	2.584574878	2.369208628	3.800138906
YALI1_B02082g	NA	0.159081122	0.05375677	0.095335026	0.895654092	1.264592417	0.286684123	0.09417815	0.540452489	5.486752731	3.081310871	3.159632603	2.89079671	2.84432512	2.329028676	2.787304268	2.696643855
YALI1_B02091g	YALI0B01224g	72.76644134	68.70161074	75.87895595	74.10964701	75.92456976	80.17069546	72.50713513	83.5936341	59.60189883	70.6181025	74.09097477	84.14129188	76.80890756	73.19933158	79.63421706	73.88237255
YALI1_B02149g	YALI0B01254g	29.24735887	30.08501908	27.83480095	23.38296934	26.24439848	24.36815047	29.42842951	26.34777373	32.57215113	28.04304136	25.31563997	27.17195955	24.08820395	25.93012644	29.08234929	28.77471435
YALI1_B02151g	NA	92.08757461	81.33399325	71.06126134	97.35932224	104.1829599	110.9688083	117.2445522	102.654793	142.1543772	145.6080994	120.9354053	95.97692155	97.85151626	150.8726197	134.9561049	154.0471449
YALI1_B02162g	NA	35.96093255	30.37983957	29.43533329	26.85146762	35.65404912	30.42725815	26.48187762	23.59002081	51.99439665	52.3179331	24.95847001	27.89228177	23.82491873	37.0966009	33.29698612	35.99616776
YALI1_B02177g	YALI0B01276g	9.812836028	8.63637393	9.37776442	9.26933615	12.05443542	10.30530943	10.58389865	11.86451361	14.3294296	13.70445619	11.7015871	11.21256434	11.92512117	12.48140756	12.31673148	13.61720278
YALI1_B02194g	YALI0B01298g	114.5534155	72.54364562	96.70964868	131.9716732	110.9787217	129.2155662	94.95609698	113.94472	90.61294492	82.29319837	73.64787175	86.34118891	98.48960791	71.60029835	91.06839085	70.27127182
YALI1_B02228g	YALI0B01320g	22.90320566	19.20080913	24.0311323	22.29028935	23.68614079	26.01935691	24.7305418	25.67814593	18.78071077	18.70756009	18.16453949	21.26864989	19.39984145	18.93287646	22.27128752	19.370179
YALI1_B02283g	YALI0B01342g	11.67512119	6.905856214	10.98568689	13.16853584	13.75453984	14.56820239	11.1639288	11.86950521	13.99121946	17.9412543	10.45240623	11.30449092	12.36483124	10.68508932	12.20232746	8.338242725
YALI1_B02345g	YALI0B01364g	256.5620357	363.7924687	336.0312578	260.9615395	277.8377556	287.9588168	279.9243344	270.0868871	195.6527368	214.4033594	310.2277572	297.1662082	219.7670725	239.9102768	277.8071252	260.7199098
YALI1_B02375g	YALI0B01386g	133.8763	110.4913166	137.1533513	140.4174652	131.1881266	147.1575078	136.9116515	131.6146643	134.9047589	138.0450185	121.1400466	146.9569873	150.5532732	132.4436594	150.7738974	124.6753881
YALI1_B02415g	YALI0B01408g	111.3716903	85.21174513	93.19436772	106.5416853	101.352577	119.6278608	105.1486317	120.6567485	128.5364509	133.7228352	113.3460718	121.7372658	132.2936415	122.5614622	122.8639085	123.447727
YALI1_B02430g	YALI0B01430g	19.36295203	16.0215159	14.56818424	13.71199801	13.29552893	16.55041297	18.7838145	16.69325137	11.57266294	10.40918671	10.13756872	12.91007601	12.3822086	10.94095132	12.33045382	11.84866583
YALI1_B02465g	YALI0B01452g	15.90128468	14.03743848	15.04534002	11.24805078	13.61348786	12.1108662	15.2956633	15.62499176	7.581079215	7.05106838	6.038142397	6.134154822	7.015970662	7.240869077	8.682144525	8.94698553
YALI1_B02472g	YALI0B01474g	76.01445353	82.74095102	76.49915642	54.55113342	63.18661315	61.74433521	75.08708711	72.54311019	40.19959189	29.90826333	25.95025316	22.86294377	27.13363388	26.36400886	31.1786282	34.88993583
YALI1_B02482r	YALI0B01496r	0	0.365546037	0	0	0	0	0	0.306256411	0	0	0	0	0	0	0	0
YALI1_B02487g	YALI0B01540g	820.276807	686.1038012	820.9980013	775.3901391	738.7518977	772.8184862	829.4242756	823.2828578	858.7110945	981.0453625	761.0825794	925.887772	544.0568828	1113.079773	873.4308905	944.7093618
YALI1_B02496g	YALI0B01562g	70.42499478	59.09452288	66.20429842	45.4437096	51.1616611	54.32762313	60.92681244	57.95797687	60.4329642	47.01685152	44.36054256	41.34565295	42.72332184	41.98898388	44.83771017	47.37985755
YALI1_B02506g	YALI0B01584g	50.25697557	46.04716526	46.09309402	35.16748969	34.92982953	40.29470822	46.50202283	45.19516021	35.62750845	29.21635514	31.23529884	28.96036439	40.90465683	27.32919178	36.12064245	33.54861378
YALI1_B02533g	YALI0B01606g	24.97656904	25.24851358	22.75761861	28.42939734	26.52213245	28.0935431	29.4974841	31.55563434	27.8817168	29.99328349	26.54320437	31.60453053	29.21074932	29.66632455	31.64033753	31.10094569
YALI1_B02550g	YALI0B01628g	83.39433404	71.48539754	74.37786567	78.17936032	75.88124569	77.37894721	68.95008072	90.41999054	77.9959897	75.03142447	66.8305984	72.10765885	82.00579896	69.3431396	76.40057701	77.96690606
YALI1_B02604g	YALI0B01650g	7.361920811	5.940123103	8.171006147	5.551189426	4.234468549	7.818114941	8.872366541	5.901816244	8.501609049	10.61534938	4.045747515	9.043777208	8.446369307	8.309744289	9.112340875	8.5452859
YALI1_B02637g	YALI0B01672g	23.39602361	21.04014981	22.88572715	24.35293892	24.89776606	20.33323811	22.94311143	22.6166798	19.23792676	17.47552757	13.00084249	13.71447742	14.55795814	15.82716412	16.13943909	16.13761461
YALI1_B02642g	YALI0B01694g	68.49651318	62.17499436	58.951824	69.94270285	77.89962868	79.86515106	80.09241376	76.19169483	56.69242126	51.13272921	49.66125808	51.83005782	57.88140357	44.76703653	58.35397299	50.98121589
YALI1_B02672g	YALI0B01716g	83.87180967	55.02686345	61.49998941	67.1471873	62.53984319	71.34994456	63.614201	77.91163083	70.81111628	66.35089408	58.61685591	68.18211707	59.85918681	69.44990992	59.06416859	64.25518822
YALI1_B02696g	YALI0B01738g	380.2486099	300.7173685	377.4113887	498.6756097	484.1031761	495.093595	450.4198672	439.3154788	307.2872604	316.4536728	434.8282391	357.214037	482.0652285	343.1318891	369.8111814	355.262028
YALI1_B02717g	YALI0B01760g	49.75544817	48.64707451	50.6947387	38.64259256	40.79168682	37.41839218	51.71853359	46.48275615	43.18379941	33.92097116	27.02332514	35.32434843	25.64869918	33.90153274	34.54915972	35.37991356
YALI1_B02733g	YALI0B01771g	8.699332321	7.790325381	7.262132546	6.760230683	7.133984845	7.456920361	7.978896374	7.489057033	3.153758486	3.773189914	2.235250807	2.07375611	3.333324268	2.476095454	2.57602059	2.566607247
YALI1_B02767g	YALI0B01782g	61.39832051	51.15636024	61.27297331	66.28381612	72.16135753	68.79851888	66.79983729	71.12889271	100.6291554	101.980616	91.29067987	83.03998858	90.4942594	91.36958653	89.06462053	99.10984985
YALI1_B02781g	YALI0B01804g	93.23939922	90.67465646	101.2337548	112.8335598	106.811469	111.375273	109.6451762	113.8951472	167.8332686	157.2471076	137.6550868	147.1145042	149.0933044	157.8954322	150.3760056	159.6841438
YALI1_B02806g	YALI0B01826g	101.3091228	88.01515204	97.39287899	89.75915824	85.24294041	89.99801892	95.86262129	94.13814276	64.70032835	57.51441633	53.17854346	59.07410479	52.03448506	56.73470948	57.03475532	59.43205974
YALI1_B02833g	YALI0B01848g	12.57254029	10.12361368	10.94200067	12.3296898	13.06127418	15.3144809	12.01227112	14.89731135	47.05775427	40.01186081	30.97694395	38.15540819	40.82277046	33.33265772	38.66260759	37.53325352
YALI1_B02850g	NA	17.73448585	15.81689584	19.16784023	16.25095454	20.2953818	14.76147576	14.593991	18.9496154	16.31187846	13.73661315	12.51466907	14.01851097	8.476173009	13.02862623	11.42547356	11.41433664
YALI1_B02874g	YALI0B01870g	91.06778435	90.47264418	90.27796373	64.52068167	72.797134	71.8546011	78.95653049	73.50894795	63.66569018	58.64204464	58.23877151	49.35491416	60.41791201	51.123849	55.41479038	58.38943589
YALI1_B02881g	YALI0B01892g	118.7930271	129.0389778	125.7289834	117.5298038	130.1295689	120.8921935	138.290184	97.28779564	97.53945783	109.015237	117.1747385	101.6952534	71.18228309	103.8701633	106.9752125	96.05805471
YALI1_B02910g	YALI0B01914g	0.175669068	0.131221654	0.132980138	0.35137199	0.120268929	0.124964874	0.131366445	0.196318212	0.179374609	0.097682582	0.127133146	0.084006058	0	0.105281828	0.024922642	0.065990745
YALI1_B02923r	YALI0B01936r	0.176372548	0.178799692	0	0	0	0	0.626489432	0	1.140588543	0	0	1.068337915	0	0	0.47542648	0.314711297
YALI1_B02931g	YALI0B01980g	24.06439006	27.02097719	27.15351587	18.91974391	23.67603439	21.62157079	28.10619185	20.75016951	20.67558385	19.21961721	14.89033507	17.21412278	15.22474156	13.20714967	15.02764012	15.53998154
YALI1_B02991g	YALI0B02002g	80.09419355	70.42119852	85.8223728	94.71382341	85.64229418	99.32241867	90.550724	91.07973432	59.00813438	60.87997284	70.88604737	69.10080742	90.09919064	64.34028867	80.0441886	72.18093943
YALI1_B03021g	YALI0B02024g	1.503780292	0.811413849	0.784910793	0.921760602	0.47325554	1.63911326	0.99077103	0.597406003	0.470556708	0.128126257	0	0.146916425	0.400305157	0.05918309	0.261520097	0.129836051
YALI1_B03041g	YALI0B02046g	31.10035935	30.65216576	29.09733091	20.39632898	24.9635521	25.24741363	26.91213452	27.39731961	22.35710327	22.86508823	18.3695928	15.85343711	21.82810886	18.41346612	22.00113642	23.65525838
YALI1_B03043g	YALI0B02068g	67.95619211	67.71037364	63.68086367	55.51677443	62.05876747	60.65794993	68.91812122	64.19605528	69.77672271	63.51809919	61.8502756	54.47792877	63.86098956	58.07044833	58.43113349	61.14867391
YALI1_B03085g	YALI0B02090g	1.898884514	1.850499191	1.861138358	1.59072427	1.235037957	1.490237967	1.490425217	1.180977438	1.089350326	1.261963826	1.123033454	1.085276455	1.061511352	0.851954997	0.990696177	1.164039745
YALI1_B03120g	YALI0B02112g	0.109267841	0	0	0.115349391	0	0.14768576	0.097032033	0.185609946	0	0	0	0	0	0.08887427	0	0.097486328
YALI1_B03168g	YALI0B02156g	12.45946073	12.6309211	13.80485218	12.64311714	14.55307735	14.75143394	12.60809982	14.84796705	18.73824035	20.15357386	16.93311346	18.94074095	19.32812688	19.56106823	22.19505885	22.87838729
YALI1_B03198g	YALI0B02178g	317.695997	253.8060255	304.5413688	376.2938985	352.3810347	323.5798413	309.3674105	339.5741442	318.1874104	350.5355787	358.8120673	351.6292293	392.9645377	391.6876473	351.3584266	381.7206314
YALI1_B03225g	YALI0B02200g	13.45386067	11.56987693	12.50687609	15.26203023	14.08621468	14.98871142	16.49361486	15.7606483	4.014776025	4.178003848	2.80652417	3.502894127	3.263336731	2.573161661	2.338261055	3.459844946
YALI1_B03244r	NA	0.400648752	0	2.521081786	2.537686595	2.171522333	0	1.77892061	2.552136754	3.238708209	2.116455952	0.918183833	3.033552103	2.892946062	2.281106275	4.589919848	2.32342414
YALI1_B03288g	NA	4.462225471	3.15283457	3.768116884	5.567049967	7.915198904	6.944922883	5.043239928	8.843153854	3.060579258	5.357279127	3.408757481	5.323883941	3.626514528	3.84936684	2.551455445	6.695482834
YALI1_B03290g	NA	12.77387562	9.21642668	14.20694721	13.03938963	15.88445485	17.62802374	13.55764601	13.61863613	10.04688632	10.84120788	8.966944244	6.85453688	10.05056945	11.13859341	10.59875109	11.46501437
YALI1_B03299g	NA	5.900463433	5.768031624	9.85046056	19.13152037	15.3811465	9.304202905	13.84785732	13.66221779	19.30606582	22.63508411	17.06390994	17.87037966	13.18732556	15.88310177	19.12408163	21.68374457
YALI1_B03314g	YALI0B02222g	109.8111453	125.0979771	125.153703	110.3893669	125.4416068	124.7288294	141.6020805	115.3282242	94.030495	113.5831361	103.7547732	97.98373294	73.70124492	104.7951085	100.3032485	88.55820472
YALI1_B03324g	NA	1.940098031	1.817796869	2.325345623	3.227275343	2.039342713	2.383840806	2.401542823	2.122157192	8.174217893	8.61823164	6.467207869	6.677111967	6.306981788	7.961733898	8.003012421	7.081004173
YALI1_B03335g	YALI0B02244g	113.6085064	96.52907738	111.6511818	133.8168281	116.782497	130.1259235	106.6721658	152.9124337	157.7192012	137.6009027	133.3077719	173.1937629	135.6772918	150.695213	146.0294045	134.5676894
YALI1_B03404g	YALI0B02266g	26.38317905	28.26504009	34.00809329	39.68836674	39.89728273	37.40524383	37.77519485	35.50837684	39.17388874	39.71124535	56.34064114	47.99132357	54.68519852	43.49382741	52.71444479	53.48124381
YALI1_B03429g	NA	10.75155583	9.495281207	11.02863478	10.44474666	12.58423674	12.83785488	12.41773362	12.10086305	11.51716236	9.23368435	8.918700283	8.090705427	9.525554107	12.66133204	12.71282678	16.83065779
YALI1_B03516g	NA	0.316301646	0.128261767	0.113733013	0.133562452	0.411446337	0.171004565	0.224705761	0.10745839	0.920474965	0.167088628	0.144976395	0.287389147	0	0.257267625	0.426308345	0.141098632
YALI1_B03556g	NA	53.4114867	49.63429785	54.79976437	39.61170169	33.10214356	36.39992476	50.53246357	46.60839747	33.33845263	22.61962298	16.527309	26.27814509	26.03651456	17.1388476	18.3765541	19.70442396
YALI1_B03610g	YALI0B02310g	0.586997008	0.085010706	0.301524732	0.708191608	0.545405609	0.566701174	0.372332221	0.569779368	0.271147664	0	0	0.253971804	0	0.204617506	0.226042564	0.411482987
YALI1_B03644g	YALI0B02332g	195.0166611	176.0302485	186.7649495	230.5908739	247.9470946	257.1590213	273.0293612	224.9188392	115.6532254	106.1610581	103.6349515	118.8636454	131.8950708	104.632252	125.1107478	120.0402611
YALI1_B03673g	NA	1.182046483	1.779313492	1.73875934	2.344419073	2.019084341	0.968270879	2.544681137	1.338604178	0.34746406	0.851488073	0.656714265	0.976361803	1.034563492	1.22363979	1.351764474	1.470042171
YALI1_B03685r	YALI0B02354r	0.225364923	0	0	0	0	0	0	0.191410257	0	0	0	0	0	0.733212731	0	0
YALI1_B03719g	YALI0B02376g	36.04900721	37.32677692	41.06211491	40.59242283	37.72890124	39.75482445	42.50305966	39.11700636	37.27109451	39.30529591	40.3078881	39.04380427	43.96056673	36.28830794	37.99684949	36.13405291
YALI1_B03761g	YALI0B02398g	5.377921442	4.38905333	4.790014327	5.169415167	5.134399897	6.30182044	5.049538159	5.981952465	1.395931246	1.661550653	1.568869412	2.241438726	2.035759405	1.289183617	1.778828686	1.678221015
YALI1_B03797g	YALI0B02409g	7911.709854	5837.748191	5751.43804	7342.933748	7545.328476	7016.970402	5526.789129	7052.328718	5381.773137	4008.879941	3322.138452	3487.316675	4715.611625	3433.979743	3692.013118	3688.947234
YALI1_B03807g	YALI0B02420g	57.11648603	41.19703838	50.95466445	53.48174499	46.27948396	50.44207146	48.12691817	59.13811287	48.56119089	44.95352441	33.30252763	46.68636687	39.24074694	35.07689707	42.25696209	34.74412714
YALI1_B03832g	YALI0B02442g	0.468475115	0.043174729	0.114852432	0.089918029	0.184664891	0.402937921	0.151278288	0.488322229	0.344272132	0.449955202	0.195204437	0.3224642	0.790760285	0.381039687	0.688806869	0.227979837
YALI1_B03853g	YALI0B02464g	68.35749658	73.70808071	62.77263762	96.84783926	95.50632436	97.61777382	85.59711781	113.2627431	75.83538634	76.29373396	62.2411424	71.48468716	63.009948	69.30264336	78.51348002	71.02833084
YALI1_B03867r	YALI0B02486r	0	0	0	0	0	0	0	0.160250447	0	0	0	0	0	0	0	0
YALI1_B03910g	YALI0B02544g	67.29281334	48.96496547	62.09466611	37.83987858	35.97566602	43.03618714	37.61016459	42.12983542	20.84324501	20.2562353	25.83365207	26.19225229	39.72308076	16.67047466	22.56132204	18.89637317
YALI1_B03963g	YALI0B02552g	21.29342681	18.31578038	23.15035478	21.4367736	26.1474147	23.08561623	24.77381017	25.43540083	23.4107466	17.89519203	22.0726561	21.62603328	23.41328678	20.18264518	19.72102404	22.18070495
YALI1_B03979g	YALI0B02574g	117.5555354	107.919812	109.3460299	103.882393	113.9929848	115.4552763	116.8205988	117.9127266	82.6150377	93.36437935	82.3715456	86.73020758	83.32366243	82.3424769	94.9782629	83.4306238
YALI1_B04007g	YALI0B02596g	0.522644046	0.234113754	0.284076952	0.256619993	0.474319035	0.657118664	0.431738036	0.350990493	0.471614139	0.321035453	0.278550152	0.220869861	0.05015059	0.266922388	0.131053891	0.130127817
YALI1_B04023r	YALI0B02618r	5.884253369	4.157584048	7.693850852	4.894109861	3.86578701	2.410036859	5.383678416	1.817345733	2.306244966	4.238726343	1.634569022	4.59033104	3.310765588	3.625777243	3.124231157	1.113593819
YALI1_B04032g	YALI0B02662g	269.3545142	176.0278898	236.3018211	250.5898123	237.8340888	273.8255354	251.3930654	275.0312691	289.351794	268.183713	252.6496371	268.5867444	326.4413381	248.5624538	285.0904389	260.9104692
YALI1_B04068g	YALI0B02684g	3.549218156	3.15396746	3.608391322	3.076682839	2.917018512	3.35917975	3.151776862	3.766194536	1.329743999	1.08621417	0.870756982	0.954440732	1.281844932	1.094365449	1.397727658	0.981066951
YALI1_B04123g	YALI0B02706g	116.9643949	108.9579526	114.3497387	109.9348558	115.6214102	105.8650656	109.5211059	117.4859014	118.8992624	111.143552	103.2571381	114.4390552	103.5909087	118.4193279	115.6315256	113.472994
YALI1_B04138g	YALI0B02728g	973.6998602	633.2980849	801.1165316	1103.575252	966.0087281	923.3953899	916.604063	849.2676579	1124.816907	1061.135085	1055.029882	1029.429562	1211.737408	1165.741334	1163.441508	1071.167164
YALI1_B04200g	YALI0B02750g	35.62782347	30.02494369	35.49852127	35.66032689	36.53277796	39.54004971	39.23197526	37.72841971	20.91492752	24.2880595	25.01579086	26.5773278	30.10233062	22.54163687	26.70015043	25.93672665
YALI1_B04212g	YALI0B02772g	38.92307249	28.23906453	32.00218467	29.30061	31.17062335	32.31453117	29.43969816	39.89113523	32.19111406	31.9704602	25.16311422	28.58194576	33.75899116	26.77157802	25.87652273	30.8145726
YALI1_B04228g	YALI0B02794g	7.89963361	7.214724416	6.47425176	6.641392944	6.696289131	7.425873221	7.887172219	8.317279359	9.342820891	8.082912368	5.969403053	8.643228585	10.83549685	9.666831011	8.210698726	9.39716889
YALI1_B04248g	YALI0B02816g	78.82249521	75.5618335	76.81327648	96.36689312	97.84210151	93.27318937	86.37960352	93.32952273	82.81364089	81.62262955	86.57239625	80.23865216	95.26629833	83.19501138	95.53190885	85.40120184
YALI1_B04274g	YALI0B02838g	56.94423414	50.19465769	57.83035532	61.02021736	60.37418984	61.29907039	53.55873206	65.86064801	75.52973908	77.07725015	76.66214613	81.9335777	84.93281946	69.30841968	77.95566572	80.54577272
YALI1_B04309g	YALI0B02852g	208.1742961	149.2575476	173.2824944	198.5149601	161.3037089	191.6016668	181.2885582	214.8157247	177.3305723	167.1138853	151.7725847	157.9069691	142.1412045	155.0489155	136.5155812	142.4385768
YALI1_B04321g	YALI0B02860g	96.29797158	76.82061871	92.6773185	99.85149382	93.74993713	101.8688151	92.96421279	108.9397803	89.83647803	93.53007587	81.8734218	93.97449142	104.263716	90.58020302	99.59602611	92.21768893
YALI1_B04370g	YALI0B02882g	62.42366034	59.26365994	60.6279507	67.16683391	71.87038431	73.34027221	68.91308904	72.6865013	48.67465015	53.07354662	54.00253787	58.33227125	61.51176558	54.00545387	56.60755988	53.92880746
YALI1_B04391g	YALI0B02904g	55.77180332	50.40242422	47.13282238	51.06304067	55.2926772	56.53237469	51.14175179	61.06872712	27.97621507	29.02971655	27.19506939	30.79487207	27.55873071	29.06497016	33.81618884	31.53795447
YALI1_B04433g	YALI0B02948g	110.4932022	118.5825847	110.7190881	137.2640403	127.4601973	128.8763687	138.9644629	112.4743938	136.0987983	139.7457673	124.669344	135.3192325	152.0800926	128.1413288	156.6500464	125.1504552
YALI1_B04466g	YALI0B02970g	84.77557096	86.79773987	87.44858768	89.97988745	78.25796867	84.19973693	84.95670639	82.94987459	62.1418524	56.94167129	55.55988982	57.56649193	45.18799335	47.1440186	59.40470732	46.78410343
YALI1_B04470g	YALI0B02992g	251.7898009	208.7158754	208.1747001	236.4025505	216.847572	240.117208	228.9709784	231.200735	218.9173394	215.1440653	190.2490607	203.9090336	198.688029	227.2302859	229.8667322	218.9273738
YALI1_B04497g	YALI0B03014g	41.61630819	39.75313153	38.66932667	30.5823184	34.06087458	31.97662335	37.6126527	37.40349201	37.68318551	33.5568659	31.96964178	29.10900572	32.65267923	28.89596649	28.54326056	33.18883448
YALI1_B04502g	YALI0B03036g	59.19456341	57.16167322	64.56349794	36.90536921	49.77352863	47.18845275	54.05017409	46.52994391	66.27814799	41.75458753	42.66599297	39.47653791	44.53824379	40.66970532	42.83191299	42.8295511
YALI1_B04523g	YALI0B03058g	13.05264238	12.6939617	14.20883668	14.3396674	15.31369448	16.05627449	14.34346124	16.35115562	21.92117433	20.09183527	20.68743643	21.71067529	20.38083332	19.73647969	21.02079731	19.65484615
YALI1_B04540g	YALI0B03080g	139.1756962	143.2253533	138.3573552	132.5898667	130.7591646	128.8895261	156.1808722	133.0982138	118.1389462	111.7957488	100.4533169	92.46022498	96.41997842	98.27511046	99.53856382	97.93646576
YALI1_B04559g	YALI0B03102g	39.63066142	33.43871262	42.51739298	39.90782137	42.47636291	47.12903994	41.41383953	42.76186583	36.18739608	33.81544981	33.39527397	33.76440306	43.892103	31.61394894	39.99736006	32.95763833
YALI1_B04577g	NA	0.808786265	0.717426802	1.272321649	1.387426783	0.219181693	0	1.167104923	0.558130842	0.163448826	1.335147446	0.810919367	0.229642729	0.104285105	0.575606256	0.272518606	0.721581041
YALI1_B04579g	NA	0.801297503	1.489261633	0.720309082	1.691791063	0.868608933	0.361009637	0.948757658	1.247711302	2.590966567	0.705485317	0.153030639	0.101118403	0.275518673	0.434496433	0.359993714	0.238299912
YALI1_B04589g	YALI0B03124g	260.9620985	174.3357059	208.7681863	221.3541394	209.7539072	220.9001175	205.0061207	247.1952179	244.9819144	200.503439	172.8160769	196.4154439	197.2633603	206.9024019	200.7540525	195.0055284
YALI1_B04637g	YALI0B03146g	5.50603797	5.029545294	5.054471012	5.011474606	5.019497306	4.864864571	5.839722836	6.576801334	12.80221745	10.25205934	10.16607856	10.69490797	11.66023764	11.03775281	10.09568701	12.07261212
YALI1_B04663g	NA	1.279491175	1.238139803	1.150170953	0.368373861	1.134795542	1.100497118	0.826337315	1.0373201	1.5044322	1.536137384	1.066278	0.35228347	0.719903628	0.993384991	1.410943103	1.297197101
YALI1_B04690g	NA	73.5591108	47.62150998	71.52128951	80.90779286	93.16482265	93.50059334	105.8600076	72.72058468	42.76066448	40.00101749	60.36599612	53.73027485	74.48302915	31.5428117	44.61402093	42.19963776
YALI1_B04703g	NA	58.53634358	39.07069981	58.51341957	61.39883281	66.24553195	66.58517997	81.83958919	54.94717287	43.15473536	37.41591772	50.54780869	44.10863552	54.92303721	30.9663351	39.60515255	35.19952756
YALI1_B04747g	YALI0B03190g	55.50715587	55.23267032	54.95288239	66.62059625	59.29338123	64.74965695	56.90300137	71.83798626	73.15176621	72.85424993	71.03722929	72.98061196	90.75090789	78.69004676	86.2190924	83.10887555
YALI1_B04753g	YALI0B03212g	57.2582328	58.50537313	53.21948652	58.56055593	61.86592247	72.67230686	48.0781775	85.8574006	68.31919356	63.40766494	65.94640536	58.10074176	76.7353434	64.84056627	66.8298182	72.4786834
YALI1_B04759g	YALI0B03234g	53.53412715	52.94466788	42.65067333	51.68028258	54.54056092	57.80351971	44.63518661	73.84340614	50.5961541	46.44636416	39.43492798	41.06724071	48.21512696	49.64020706	39.02624874	45.71950064
YALI1_B04779g	YALI0B03278g	56.22017754	79.22427041	70.79197656	33.73673064	44.86116966	41.14736264	63.97710081	32.03879563	32.77942846	27.14354758	31.20119834	30.53920239	16.355182	25.61635794	34.67896585	26.51307797
YALI1_B04781g	YALI0B03300g	14.29545918	16.18607739	15.28720041	8.074721305	11.3505522	9.903394789	15.69520893	10.97477206	7.924088826	5.5248218	4.992230636	4.798149231	4.034425597	4.208003502	5.254713731	6.040248394
YALI1_B04803g	YALI0B03322g	90.32626106	85.08084013	92.86584837	75.55961836	76.17157464	74.93206268	78.17021889	88.029577	96.11676287	97.85963206	81.29370114	99.89107882	87.82674286	104.0428866	102.9998264	105.7202665
YALI1_B04831g	YALI0B03344g	24.04454167	30.13192567	24.93144565	26.43225897	25.82690954	23.41164363	30.55420838	20.14995449	27.62285151	30.08532245	24.75234829	21.35677383	26.9403188	19.70766183	25.63945881	21.64743124
YALI1_B04853g	YALI0B03366g	581.508002	400.9021292	504.3019678	534.0062222	496.8265104	526.8314235	543.8903951	506.8857381	454.6429562	395.0334675	375.9285448	388.3481294	476.2029733	425.2513643	431.38718	437.8614383
YALI1_B04873g	YALI0B03388g	32.956862	24.48902822	27.04181333	22.28017846	24.81913357	25.49283433	26.60170512	30.3258096	20.75038085	18.88159916	15.83385547	16.68665793	19.55989905	17.58685083	19.3886824	19.56100657
YALI1_B04901g	YALI0B03410g	48.70482697	53.28975822	60.28519507	44.69012498	52.23242012	49.90784663	52.27973992	47.66115389	58.22667956	55.32420945	63.13948516	54.00670729	56.89228782	53.40467731	55.81308786	54.35729827
YALI1_B04910r	YALI0B03432r	0	0	0.351476118	0	0	0	0	0	0	0	0	0	0	0.15900999	0	0
YALI1_B04937g	YALI0B03476g	67.9822426	66.17618224	54.61305587	45.36972115	48.93320163	54.11705199	34.76395503	67.58540962	77.28258048	79.71245231	72.81507995	69.87459318	88.52917586	78.84811181	77.0460735	83.37155884
YALI1_B04947g	NA	31.66250556	25.38285965	24.36506169	19.50311945	24.5064835	30.72029755	26.33602017	24.62095076	26.13528355	20.06471583	19.91633584	14.90871562	25.95293024	22.88612323	19.65808369	27.65216111
YALI1_B04950g	YALI0B03498g	32.47094602	29.38356028	28.61023572	18.04217485	22.71456677	19.39505853	28.37741417	27.39119835	41.49181792	40.33144377	33.054618	31.62013748	42.41370994	42.19714087	42.00355223	43.52043325
YALI1_B04974g	YALI0B03520g	66.27985273	52.57246504	60.39222986	56.77544393	58.14940972	62.48131417	58.20427278	69.59765385	60.8186995	59.93183804	54.1009473	59.72086657	64.28674712	51.60537566	59.40450822	56.4635428
YALI1_B05005g	YALI0B03542g	99.91178244	56.88810202	85.49168415	100.3443574	90.0096007	93.00510761	77.0272624	85.73052714	67.85093698	51.05949983	50.21317838	53.12508121	71.65207479	42.4041363	56.93525577	48.90361002
YALI1_B05024g	YALI0B03564g	1421.469872	1165.387542	1178.049445	1268.447289	1162.688383	1273.088411	1113.15334	1308.997444	1366.761682	1491.939679	1561.751748	1534.379349	1725.055313	1457.813716	1424.612925	1345.166954
YALI1_B05043g	YALI0B03575g	18.16336457	11.98650959	13.07109713	11.52581842	14.2350864	14.96091098	10.67848809	18.39675136	13.90987516	12.69135272	12.16486813	15.31449978	13.33830746	14.97800147	17.25834979	15.84583576
YALI1_B05053r	YALI0B03586r	0.174476069	0.353754229	0.627365974	0	0.756530361	0	0	0	0	0	0	0.528425205	0	0	0	0.311327304
YALI1_B05072g	YALI0B03630g	143.2785388	414.9173725	324.0749009	167.3930942	179.6956231	181.2049446	169.4871014	148.708713	192.1195296	191.8365628	221.645941	244.0755475	192.0146915	201.1906697	222.0343653	198.7801718
YALI1_B05106g	YALI0B03652g	116.8639311	130.7597812	133.1703959	134.3292296	137.5123058	129.7090226	134.0620291	117.2814459	167.3748794	168.3347466	186.2309125	168.384071	163.7477181	156.1654779	162.5436676	145.9687448
YALI1_B05123r	YALI0B03674r	0	0	0.335316297	0.393778954	0	0	0	0	0	0	0	0	0	0	1.005499683	0
YALI1_B05185g	YALI0B03718g	36.38510453	28.33385706	36.12986783	34.35971568	33.65619669	38.88672144	39.16239667	35.58327245	26.42678538	27.57765491	25.22925677	29.39109749	32.21171	23.09741631	27.97136238	25.84214429
YALI1_B05201r	YALI0B03740r	0	0.228466273	0.810347717	0.475816237	0	1.218407523	0.800514274	0.765641026	1.457418694	0	1.032956812	0.341274612	0	1.099819097	0.911234088	0.402131101
YALI1_B05226g	YALI0B03762g	108.0039505	82.38986903	99.20055218	99.22719721	98.55086981	112.1706287	101.0513933	111.1776869	91.69784842	99.6942111	96.72042809	100.1491217	108.3097598	90.89727904	97.82065152	98.32365796
YALI1_B05242g	YALI0B03784g	57.72550065	68.15937585	65.4391829	46.16602802	54.9171043	48.07723352	69.63619545	38.2384561	39.39698363	33.70700889	34.5838352	33.43276693	21.32426281	29.90255481	33.62161929	31.99303522
YALI1_B05265r	YALI0B03806r	0	0.195828234	0	0.815684977	1.675174371	0	0.686155092	0.164065934	0	0	0	0	0	0	0	0
YALI1_B05282g	YALI0B03850g	37.56864877	31.14100609	35.09666305	29.91062867	31.53624858	31.76161335	35.44080431	39.54942504	36.97579292	34.1262617	25.53618284	29.15128065	38.57399452	23.73317042	31.24857256	29.62070291
YALI1_B05288r	YALI0B03872r	5.467548997	10.37038214	13.00079598	7.819936409	6.118028138	5.721217935	11.59005449	5.842173918	5.132648444	7.453605743	8.084009836	2.937929265	4.730236341	8.89418922	4.516551564	11.01489538
YALI1_B05295g	YALI0B03916g	12.05462587	30.42004122	59.48297072	74.1665904	84.76560528	62.13878369	50.89226919	48.33312606	26.97775029	40.12260112	29.40630245	33.72083609	18.93384835	33.39237982	34.85955084	32.75229479
YALI1_B05313g	YALI0B03938g	60.86933207	56.56121951	55.45271762	45.06345772	48.52851294	54.54716758	65.10028391	62.2289468	43.81224813	40.03764845	32.70500184	38.30676256	37.10918614	32.96073232	43.47754846	41.7226484
YALI1_B05350g	YALI0B03960g	51.7588106	53.48649307	66.70737387	57.65306733	60.16474064	55.38677533	59.093519	61.7351247	48.13530076	53.55625646	55.82270774	56.40510942	48.53433617	53.50925413	53.03719884	48.28924306
YALI1_B05364g	YALI0B03982g	2152.505451	1893.66824	1969.240287	2251.741562	2229.54541	2189.091296	2040.143591	2225.754494	1826.299939	2059.352103	2168.018368	2097.979652	2259.925705	2114.559639	1949.440605	2089.804368
YALI1_B05404g	YALI0B04004g	27.29642912	23.48109417	21.88454981	27.34882623	23.85078415	28.27947143	28.92049022	26.79255923	22.05622176	18.65379569	18.13266863	23.68489279	21.03769329	18.45641219	24.3150531	18.82076007
YALI1_B05420g	YALI0B04026g	129.5957514	120.8717425	131.1692357	127.3762161	129.763287	130.0421915	134.7826236	149.6743885	131.5914253	115.6102409	104.6244186	133.5030199	115.8616705	116.9199756	120.3952985	114.2619208
YALI1_B05438g	YALI0B04048g	58.60417333	47.38908677	56.54054999	58.5499237	59.11465848	61.54842128	56.41562453	72.04918853	74.52367755	69.85941075	60.69952403	69.66224031	78.26292521	74.00157361	70.9196894	70.34392293
YALI1_B05454g	YALI0B04070g	38.72135691	27.93908404	36.76630631	39.16152573	43.9836861	43.63018318	40.7328818	40.61414518	31.1774303	33.72120101	31.05440481	28.015872	42.09083184	29.8155905	31.2202322	32.78150001
YALI1_B05483g	YALI0B04092g	82.75044126	65.52773451	70.75615066	78.84775899	80.84920518	70.45922454	72.70986889	97.45300615	94.46374325	83.60175059	68.17514962	76.89455854	78.55001103	87.98552777	73.80996109	85.13009588
YALI1_B05497g	YALI0B04114g	489.6729043	466.4001887	484.523107	376.3896757	388.2942514	385.8940308	496.5109735	351.3679798	358.2918117	269.4354249	236.7537014	261.4982584	244.2968966	218.0281378	278.1329431	205.5050779
YALI1_B05520g	YALI0B04136g	115.8472783	129.8082097	131.1416878	84.18872882	108.4585204	87.95027845	109.6285825	77.43104385	80.77238621	64.22141379	72.96171257	62.0216728	58.05856631	61.44097085	67.71730979	66.93441246
YALI1_B05522g	YALI0B04158g	48.07889175	38.98101848	44.93005921	41.46280827	41.49903373	46.14322565	38.99073339	53.66121855	43.94988783	46.52259956	39.6354659	41.69110021	46.3358422	42.46788472	45.26796167	45.01080596
YALI1_B05571g	YALI0B04180g	149.5632011	141.5558378	154.941791	149.0839085	154.2955251	147.4770412	154.6887644	151.3484805	118.4613709	133.2978513	144.7109252	147.3470548	140.7565859	134.501142	146.7867939	137.021659
YALI1_B05609g	YALI0B04202g	0.272589933	0.159986992	0.154761368	0.393778954	0.435456468	0.601124136	0.713455693	0.773764538	0.231949925	0.07578821	0.098637786	0	0.147990799	0.221714195	0.261043187	0.153599147
YALI1_B05639g	NA	3.552811724	2.204027577	3.62273097	2.463048754	2.299258941	2.293472985	2.448631898	4.098431376	5.829674776	6.442740911	5.347070558	5.299793969	2.62553088	4.959968477	4.574037773	5.961002205
YALI1_B05646g	YALI0B04224g	2310.702359	3950.049481	3367.017484	2639.419367	2563.549086	2656.356141	2968.127375	2520.905279	2295.475305	2855.212813	2246.1308	2573.682615	1232.128516	3055.276894	2745.624952	2756.123886
YALI1_B05690g	YALI0B04246g	92.62032055	110.4579284	102.6067868	64.50099273	72.86430868	65.44108822	87.64803186	81.23187275	120.252119	119.4119044	100.9590617	94.33300989	87.49807996	107.8277813	95.87439476	126.5631375
YALI1_B05698g	NA	31.40767515	27.22902583	29.5040237	22.3201071	23.71894621	22.26362838	21.39556333	28.5027273	63.39771319	51.1376644	40.56703118	45.42054831	39.56197667	50.59167847	42.57948373	52.64261688
YALI1_B05711g	YALI0B04268g	68.44971686	71.79348993	76.52213926	80.77081595	81.96409203	74.56902275	83.51986959	78.06418708	78.65607037	85.98326885	103.6253856	87.85764331	97.33854849	87.26102894	90.60977596	85.32006698
YALI1_B05730g	NA	15.79357379	18.20419265	17.50351069	26.79797044	20.79449786	17.93495874	14.60138036	20.94793848	31.94661777	29.33407949	26.60896749	43.02790303	23.9535934	33.19987248	35.47738047	31.39839638
YALI1_B05762g	YALI0B04290g	54.4577865	44.62884564	55.66017127	55.34924092	48.94540802	59.63694921	48.69949947	58.93659473	66.85189694	69.32559502	79.86601581	84.82297331	99.00261685	64.50400728	80.65373079	75.05949612
YALI1_B05782g	NA	2.113767552	2.237393848	2.291328028	1.83763512	1.9543701	1.680562101	1.932275835	2.983359861	0.804093073	2.381012946	0.926099211	1.176809006	1.85975104	2.199638194	2.471853387	1.636257584
YALI1_B05798g	YALI0B04312g	629.3818402	536.0412523	619.9480512	562.3771564	564.1394188	690.1555835	574.1089378	575.3640915	365.4909661	337.2160029	408.0704641	429.1190823	431.0839868	296.2676528	288.8080075	298.4403472
YALI1_B05830g	NA	0.05200729	0	0.09350166	0	0	0	0.138550547	0.088343195	0	0	0.059593662	0	0	0	0.105142395	0
YALI1_B05832g	YALI0B04334g	39.6119205	62.62171481	59.8878554	46.79650529	49.58394639	42.23223611	68.03572995	29.12490134	16.69623084	19.53164563	27.94883328	23.31682206	18.78635185	19.91440345	27.50720778	20.36103149
YALI1_B05891g	YALI0B04356g	111.6154275	96.98160168	110.5380437	108.6026284	114.6696742	114.032998	126.6446256	101.3927473	61.56850401	49.75831135	50.25651104	48.36348782	58.10773147	51.04058422	61.02168951	53.55729727
YALI1_B05947g	YALI0B04378g	14.06573759	12.57525147	13.199631	11.86844009	13.46264449	12.77657322	14.28632604	12.9039207	11.78191127	11.12590327	10.20871029	9.40345694	11.5664955	8.726169801	9.855321503	11.16410037
YALI1_B05954g	NA	3.42326465	4.095041048	4.061996151	2.457380057	3.562396131	3.146267529	5.228675513	5.349795525	54.68087353	53.70841859	29.6550133	43.64859083	37.1479385	42.09940442	37.64896281	45.01832226
YALI1_B05964g	YALI0B04400g	32.27158671	30.79963171	37.73991152	45.84816673	43.24316295	41.47114975	41.71006717	43.15482989	36.79846755	34.30782965	34.69813292	37.02512366	38.20440241	40.6238013	36.61196289	39.12481479
YALI1_B05971g	YALI0B04422g	26.09163771	41.81435537	38.11209947	24.84947387	25.86076034	26.13171343	26.72817342	24.8449577	41.34935581	37.54898166	33.27686787	35.98653166	31.42933787	35.78580084	38.71296701	39.85522327
YALI1_B05984g	NA	0.947296625	1.982622574	1.703103677	2.322628409	1.324996678	1.486870198	1.356803855	1.76486745	1.6797368	1.614246065	0.980433585	3.655687365	0.945636122	1.789536158	1.812171745	1.417682526
YALI1_B05995g	YALI0B04444g	220.46995	204.4974385	230.1051621	272.7092685	272.2548938	256.585261	269.2216607	238.8561979	281.1836399	315.7741314	302.5011349	298.9777789	256.356563	326.481014	344.5503563	300.3606789
YALI1_B06015g	YALI0B04466g	25.14412934	33.03287969	32.0660521	24.7888654	26.36969608	33.52106552	29.14652948	30.45383867	26.27619265	23.2061652	27.33052561	23.17337851	33.20336003	26.05230017	25.95905888	30.0833296
YALI1_B06028g	YALI0B04488g	52.79108644	46.68301804	48.04962533	55.77941372	59.12992264	65.80881472	41.73917101	80.40936796	46.77516905	48.43375827	49.28061886	47.66138452	68.73669982	49.59211297	54.80940751	61.25969075
YALI1_B06089g	NA	4.518709338	4.685004589	4.369723132	4.987035998	5.195161025	6.940296019	5.107078408	4.739221036	5.313121315	2.079618902	2.275120068	3.525064343	1.906833345	4.510650474	4.567705046	4.459073982
YALI1_B06110g	YALI0B04510g	183.061878	124.7841245	142.6506654	184.5474901	201.3001203	200.2618911	259.9197075	173.3550491	80.97948235	68.65975512	110.3949117	72.44949755	158.8565525	66.94898795	106.7193182	126.1814281
YALI1_B06134g	NA	22.90768156	26.08995245	19.19411847	13.43481138	15.25175097	10.32062843	21.59818905	16.66395175	4.229371897	4.762025891	4.455892132	4.817994517	7.6577984	4.974345197	6.003424577	5.614065569
YALI1_B06141g	NA	23.207346	23.97301918	23.29278554	11.0212319	12.13527481	15.30093169	26.47282089	12.65978534	16.47222059	11.29596839	8.792144031	8.095351252	12.32625689	9.617022802	10.93480905	10.10003696
YALI1_B06146g	NA	7.40379189	6.471962624	5.818562296	4.212143733	3.460196242	3.834987614	8.425084658	4.895081971	16.48555572	11.94409773	8.026582444	8.92908656	10.42680091	8.041300284	8.962958238	9.097392125
YALI1_B06207g	NA	8.951113835	5.59903261	7.121929231	8.041964561	7.679848702	10.50232964	4.938383833	11.12875407	10.71510645	12.0727417	9.427549499	8.882753272	14.14458537	12.26840458	17.76264757	11.31630902
YALI1_B06245g	YALI0B04532g	42.04979657	42.62846317	38.00728439	30.56829188	33.84397002	33.78852083	38.63945729	38.36608509	35.15578264	32.49211568	25.32003894	30.61482979	30.39105358	28.16609883	31.69316607	28.92401506
YALI1_B06264g	YALI0B04554g	2.144300567	1.849360128	1.956342417	3.581291437	3.399910114	2.681938454	3.637840016	2.962894859	0.827882808	3.381320159	1.906997192	1.74474121	2.376959909	2.134560141	1.423466267	1.741774947
YALI1_B06315g	YALI0B04598g	22.0326494	14.8490728	20.73088473	16.91333822	19.4465107	23.23536077	19.54466419	25.74043744	19.68224251	18.65684522	12.20787446	13.07838101	16.01999599	14.30121524	15.09200673	15.66094139
YALI1_B06324g	YALI0B04620g	24.30474014	18.20700454	17.88998421	17.86140949	17.5893309	25.58655799	19.70496675	24.0882446	19.05855215	19.13968099	14.62031181	17.27374573	19.38432815	16.49728646	14.48628549	17.75563477
YALI1_B06328g	NA	17.10519764	14.46191509	14.70781106	17.98585374	25.06479653	20.65200752	20.65326828	27.85019233	25.14047247	18.92905292	14.09986049	21.19315338	21.34064318	16.05735882	15.12648585	19.30229286
YALI1_B06340g	YALI0B04642g	9.512584791	6.15699864	6.128311709	7.943502627	7.720533066	8.439566881	7.580969453	8.390113614	7.807952237	9.55089522	7.86770713	9.160164547	9.938241183	7.345353248	8.925368379	9.123434363
YALI1_B06398r	YALI0B04664r	0	0	0	0	0	0	0	0	0	0	0	0	0	0	0	0
YALI1_B06399r	YALI0B04686r	0	0	0	0	0	0	0	0	0	0	0	0	0	0	0	0
YALI1_B06447g	YALI0B04708g	75.13948232	64.00768226	63.52619634	67.55401018	62.8268913	62.34438996	47.37043218	87.58454815	69.1089727	70.38125454	62.36476755	60.72555121	65.329567	74.50586996	60.08449765	72.84353566
YALI1_B06469r	YALI0B04730r	0	0	0	0	0	0	0.800514274	0	0	0	0	0	0	0	0.607489392	0
YALI1_B06487g	YALI0B04752g	40.73684934	45.39248891	38.71205423	40.32994329	39.26057403	37.10744938	47.78766225	37.59394356	43.27980071	35.71519418	34.28370585	34.93960834	31.8511792	33.85772208	41.93983724	36.31396551
YALI1_B06489g	YALI0B04774g	28.81521808	24.1475881	26.73085875	19.89701433	21.71143028	24.93212949	28.83948805	22.08657039	18.78733618	17.15577013	19.75699056	17.41841773	19.85629386	15.09009434	18.90910211	19.13371388
YALI1_B06508g	NA	31.60173299	25.19803301	26.87805012	14.88395958	19.63153786	18.72788193	22.66624687	15.74295593	21.02613037	17.97798539	23.67676289	15.55291938	20.68711831	13.69212988	18.75708818	18.59743385
YALI1_B06514g	NA	29.1335382	27.78980668	23.7579217	19.46520968	25.4512288	22.9282143	30.89257359	22.13398603	26.43227541	25.16297772	18.02979163	16.47425625	28.02306681	21.19651351	16.23653465	21.98925976
YALI1_B06537g	NA	20.03781542	14.46237509	15.85888552	12.79913742	11.17532433	13.73774926	15.98879517	16.46385133	29.93088056	26.65456103	17.63652437	21.16360679	25.38747393	24.38793488	22.94597514	24.54888924
YALI1_B06546g	NA	5.011055342	3.628581986	2.574045689	1.007610854	3.621332832	3.010183293	4.520551196	3.783167424	2.314723808	1.470625643	1.276005474	0.481799452	0.32819136	0.970428615	1.929672185	0.780607432
YALI1_B06607g	YALI0B04796g	99.23647843	66.29850757	133.8523829	120.8473069	141.0026596	195.6634229	173.6526123	118.0537869	133.8370599	101.9574807	112.1682366	98.57447729	140.7146366	99.73236753	109.373669	113.1046634
YALI1_B06613g	NA	1.156953614	1.055587487	0.988017537	1.038144516	2.194747171	3.362022899	0.4109592	1.596791445	2.057532274	1.909903432	1.856007962	1.883397857	2.148161629	1.740890122	3.040695565	2.477299618
YALI1_B06620g	NA	2.846714814	2.917955208	2.217793752	1.736311881	1.3029134	4.01860727	2.303234052	2.256626183	6.545599749	4.427848636	3.044504289	4.262939008	5.416117064	4.630817251	5.073069306	4.176519507
YALI1_B06628g	NA	7.726797353	6.714110885	5.55667006	9.089061171	7.53828467	9.100758235	5.587262894	8.297048673	13.02753853	12.97409095	12.77493527	8.190590679	7.856499291	10.90840982	13.68710793	13.09798444
YALI1_B06635g	NA	16.85036192	15.60600389	14.46159003	9.077109743	15.48462464	8.435129007	14.16294485	19.72998029	22.64604432	22.34489072	16.36839257	14.2810299	17.0238749	21.65797607	24.67341529	22.95240593
YALI1_B06640g	NA	14.12535186	17.49183103	13.17987031	10.09831484	12.30768608	9.183369101	13.89322294	15.52795933	18.64532346	14.7583447	12.29303975	12.86125809	10.97406812	12.87061026	14.27851099	18.14575052
YALI1_B06644g	NA	42.93201779	40.65271748	37.45325855	28.28132756	32.33871774	26.84304075	33.02121382	38.18634619	50.28094495	48.43873211	34.47493361	26.0435188	32.69093625	34.95362568	34.91165598	48.821229
YALI1_B06692r	YALI0B04818r	0.877095916	1.556040563	1.182669641	5.555476059	0.950774643	2.37095518	1.947196884	3.352266115	4.963101499	0	0	1.992305841	3.618974997	3.21028277	2.364283038	3.130101544
YALI1_B06704g	YALI0B04840g	53.10297744	46.99307246	51.0991109	50.63978238	53.96338411	57.45442078	52.83394211	58.23703515	56.96667633	57.59508499	46.27245371	56.91665319	52.02788953	51.25370549	54.42633113	53.22185603
YALI1_B06726g	NA	84.82205424	76.11958655	107.1947027	61.1283918	66.08070196	63.81588581	89.61992747	77.98729418	124.0691961	101.1790442	74.2270613	87.68750021	50.14763981	95.02436999	82.84725916	82.99985928
YALI1_B06735g	YALI0B04851g	66.18074827	102.2149485	82.47199218	68.3020741	68.69795275	65.5181404	100.321053	70.03448482	61.87154833	73.9911004	77.17941466	81.82863707	50.52908486	87.19697822	86.72197618	76.89050149
YALI1_B06745g	YALI0B04862g	26.12929548	39.44359658	37.0362258	30.71475844	37.76129992	33.40523764	48.00948567	20.78728161	13.17026637	13.77756323	19.17921592	17.46536411	11.38192461	13.44739879	19.77753005	15.06716798
YALI1_B06776g	YALI0B04884g	12.01768452	10.67437688	12.05452166	8.61537091	8.187538643	9.43004166	10.48721067	9.663386444	2.535391101	2.916388637	1.906997192	2.180926512	2.244906581	1.665998159	2.286173095	1.299192788
YALI1_B06809g	YALI0B04906g	81.11265678	54.21528379	48.82274896	107.8933897	106.9155407	115.6770437	91.32510597	123.7556722	214.0438721	198.2749396	181.4286775	204.2121147	224.8689977	195.2806822	208.2784737	208.7937033
YALI1_B06839g	YALI0B04928g	604.2652715	684.7058889	595.2582801	446.8698773	505.5805112	524.1026823	559.6914307	594.2720546	501.4160931	427.4834011	384.5323624	340.0445229	362.7740737	362.4326932	389.1269961	418.4196203
YALI1_B06847g	YALI0B04950g	488.5092018	493.5369973	472.6831901	510.8709164	501.5624356	545.5585832	482.9720939	499.3093151	565.769937	548.1957624	608.6181539	524.0861136	615.8481035	525.0936304	506.1159801	536.2308562
YALI1_B06866g	YALI0B04972g	34.55313601	28.36239468	32.52945545	31.5163535	32.38460923	36.23676559	34.58582122	33.64798386	63.29517435	58.13602715	57.93085373	53.53849517	61.36131668	48.20220283	53.47730255	48.4277507
YALI1_B06885g	NA	5.251982549	4.688525258	5.355341434	4.634036391	3.398904521	3.390351369	5.429575078	6.391438132	13.4335984	7.453605743	7.006141858	6.766140126	5.174959416	8.989825663	4.22601316	5.664803338
YALI1_B06892r	YALI0B05016r	0	0	0	0	0	0	0	0.186237006	0	0	0	0	0	0.356698086	0	0
YALI1_B06928g	YALI0B05038g	53.36917681	50.2590787	48.12409814	55.71242984	64.57658138	65.33651991	63.79577359	62.54201793	70.15712058	69.02200746	77.28574955	69.95998782	87.18740891	58.77500677	78.01001706	86.65077827
YALI1_B06969g	NA	0.561948898	1.210574538	0.505151824	0	0	1.139290152	1.247554713	0.656263737	0.454260372	1.855334763	0	0.638227845	0.289831331	0.457067677	0.757389371	1.25339564
YALI1_B07043g	YALI0B05060g	0.667909602	0.464677166	0.494449454	0.77420947	1.022140294	1.097451813	0.790822818	0.82311045	0.550501976	1.141502574	0.450199095	0.614790099	1.026690647	0.617816055	0.35302047	0.537473046
YALI1_B07076g	YALI0B05104g	200.8167988	151.0443428	177.5739303	231.485771	221.6140164	231.8815579	197.6599876	274.52191	251.9108726	249.2674242	218.294814	250.7208398	264.231229	230.5394198	252.8113488	252.6413405
YALI1_B07094g	YALI0B05126g	116.6392501	128.0492421	132.037191	144.3575611	139.1705456	134.3782588	131.6998751	133.6160483	119.8865943	127.3205777	145.0082121	140.9281786	135.4991893	131.7264247	137.7285109	130.308895
YALI1_B07134g	YALI0B05148g	130.9198633	112.4089439	114.9083519	107.5356974	108.6528905	113.4958399	123.1697086	120.038682	85.09820741	86.89621955	82.7378414	88.79657146	96.85583416	74.10652032	94.3262496	86.07577304
YALI1_B07162g	YALI0B05170g	79.12617407	90.68216447	81.96765981	67.12490517	73.54151683	70.32291617	79.16109936	73.65840156	69.67172294	65.94825124	66.00845972	70.91852905	62.41505929	58.12767469	70.24355386	64.03496423
YALI1_B07203g	NA	5.663621097	6.114762243	6.771282494	6.397361756	5.648231911	6.659777248	8.197936757	5.243238023	3.845754041	5.834105018	9.150591239	3.859440634	5.666885368	4.422309249	5.534196553	6.745696587
YALI1_B07210g	YALI0B05214g	42.96099328	47.67018729	41.31781094	42.04273424	44.9903974	41.47558671	46.4232931	50.49480695	51.8960028	50.73015337	43.91542105	47.70601183	45.59046835	44.24415111	48.35119648	50.16626521
YALI1_B07220g	YALI0B05236g	22.77970789	21.36272756	23.82903683	17.12938452	18.99705788	19.95896284	25.08542256	19.83086064	19.2206109	17.15036552	17.70344794	18.21595476	18.90593446	15.04356517	17.98108452	16.36394877
YALI1_B07271g	YALI0B05258g	160.2104093	90.22340824	110.0919831	134.4021009	120.3830183	143.5505591	129.2213556	153.8605575	123.9669972	97.72505307	87.78091489	119.157447	126.4336675	86.75674437	112.7192965	110.2761099
YALI1_B07284g	YALI0B05280g	310.7971523	223.6806896	281.8154297	316.7410618	279.1019529	308.1547944	297.0946793	287.8868705	309.8627898	255.7316958	197.428799	230.1806075	276.9183495	197.9002729	228.6293282	220.6870926
YALI1_B07295g	YALI0B05302g	116.3729884	102.3490747	109.544124	126.6167866	121.5463158	124.1402104	107.0115449	116.8409765	129.9445461	120.2834055	114.7164313	120.8753351	146.1554659	102.6987653	114.8421282	120.8811127
YALI1_B07331g	YALI0B05346g	513.2368018	412.0525879	451.6854911	482.0815298	423.3221742	452.4081217	503.7954236	470.132897	356.1401318	312.7215567	247.6724009	340.1642445	292.3101515	280.4380829	344.3680056	325.0450704
YALI1_B07366g	YALI0B05368g	241.6950303	324.2355072	285.9212217	224.72477	250.7119172	230.285401	284.2119056	193.6630851	123.979785	134.8825135	145.6306861	154.0917409	117.0182618	123.156706	161.5349279	127.2755462
YALI1_B07374g	YALI0B05390g	106.2801236	88.438127	91.79997495	82.49333759	91.86966016	92.456676	98.84306179	103.1994685	85.82813156	76.01861769	65.02350037	68.17520855	70.75198847	59.27784097	70.52198019	68.59123775
YALI1_B07399g	YALI0B05412g	49.0786926	50.54349583	55.6964283	45.5450561	46.44860922	46.36585828	49.63811469	50.78255616	56.27791097	52.03022841	40.03210059	46.05215382	37.68709501	45.07118572	41.64020671	44.2563271
YALI1_B07413g	YALI0B05434g	49.78157984	62.2581685	63.82078331	40.91095719	36.82944042	41.2365886	48.96349445	48.85979093	65.7111885	55.75731286	33.57611076	35.74437389	30.82131093	36.02708382	36.48475123	32.8654331
YALI1_B07444g	YALI0B05456g	27.18957937	13.32370967	16.97143332	25.54786909	26.81859347	29.30089467	17.89181769	45.1955215	73.32662357	72.08500648	55.11144783	56.7270155	66.37957755	61.29935118	55.07685493	70.70570348
YALI1_B07500g	YALI0B05478g	20.15991673	12.49295121	17.81844128	18.68660129	21.82009799	23.05282416	26.74445417	20.25468533	9.489783087	5.681962711	6.338598622	3.978951722	8.685882698	4.624239385	5.44669466	5.277970703
YALI1_B07538g	YALI0B05500g	192.7484722	228.6739698	274.4868722	167.1412671	185.620742	207.0185146	224.653415	198.8926575	271.0798771	311.5338984	232.9787138	238.1786539	165.3487743	274.0049305	217.8677864	234.6983336
YALI1_B07549g	YALI0B05522g	41.42642277	28.81208344	32.92640785	39.37061821	38.21255049	39.95976378	34.34156924	47.87221612	66.68812768	69.90497556	49.09832504	51.07766713	62.20809947	56.98282435	56.26823713	55.52877267
YALI1_B07578g	YALI0B05544g	3.404019431	2.086885958	2.201243052	2.954321707	2.654442971	3.236963271	2.604658385	3.222548797	1.435666176	2.345475439	2.004244561	1.996711161	1.720963649	2.210581668	1.904071228	2.11268877
YALI1_B07598g	YALI0B05566g	79.95083367	53.19476123	73.00057297	75.48467114	71.02565741	81.20086408	78.37366565	74.02518938	54.10950079	51.71301044	56.72699096	59.38708721	69.79848009	51.61171794	62.1150034	57.91000394
YALI1_B07652g	YALI0B05610g	391.5069345	363.9695115	375.740186	335.8225305	348.3965731	370.095616	396.9943776	351.1135402	344.8901907	412.6035893	277.2828145	306.0796564	195.406069	405.9218578	411.3422956	338.7049256
YALI1_B07675g	YALI0B05632g	26.83576158	26.80436614	27.90089524	23.71760933	26.02318956	24.96798186	25.80734864	29.47128997	25.99810732	21.64890232	19.64207108	18.01929949	24.72038305	21.37879122	23.32759264	24.52690385
YALI1_B07696g	YALI0B05654g	10.83110614	7.604827103	9.406548876	13.60021484	10.57716883	14.36373894	14.67475413	13.87387709	11.95229803	8.471141535	8.564717289	10.53663927	12.16781836	10.24655581	15.89851634	10.29374789
YALI1_B07735g	YALI0B05676g	81.34734693	70.22482072	73.7585245	84.81424416	89.49386415	90.77136049	93.2265582	97.45174688	71.62605624	64.16333844	74.17921109	63.42019866	79.9111775	66.920937	81.15045791	82.99818373
YALI1_B07762g	YALI0B05698g	42.4440003	44.50356844	39.49782109	39.44949161	40.59404367	43.27783523	48.17058259	49.47989934	27.41007086	27.89681349	20.01306871	29.75418214	23.85891516	24.81191883	30.88255162	28.26908526
YALI1_B07769g	YALI0B05720g	60.18681938	66.47882451	62.896776	65.64239314	66.73965979	70.66763635	63.59830426	63.85771964	57.18042706	56.08045385	57.4060254	53.03552688	56.78176048	55.49016352	54.59649342	54.46737425
YALI1_B07786g	YALI0B05742g	97.82677363	98.02601892	102.4511042	94.56119411	106.6128832	99.73535869	109.5887705	105.5412717	100.829579	98.03456363	100.1757301	94.15000408	72.3594971	98.93882816	95.88414195	100.0814036
YALI1_B07809g	YALI0B05764g	84.63829769	83.60156374	90.42753028	97.67878452	100.5940121	106.1746446	107.967616	92.9308729	84.17410712	87.17713732	96.28909139	76.1867911	97.83867317	85.5939012	88.13292482	94.75452241
YALI1_B07843g	YALI0B05786g	64.26588089	70.15991553	67.80400352	72.46248722	68.27858448	69.98089757	70.69268783	80.16261545	110.1013577	98.18431565	78.65496601	87.41594052	86.88418722	92.72474824	84.69506646	87.07966209
YALI1_B07852g	YALI0B05808g	40.77371526	50.25717261	43.90262543	52.43551236	46.21102319	50.09168918	50.24766522	62.05769691	108.6596186	126.0387089	101.9510037	138.3192059	89.13599659	126.7980786	125.3513022	117.9838374
YALI1_B07853g	YALI0B05830g	15.10125275	19.21309971	18.12585773	17.08370616	18.66814319	18.83170668	19.4428907	21.38894771	22.38595114	21.82912668	22.80768642	26.86513743	23.74530128	27.76823256	33.82500933	31.69436487
YALI1_B07864g	YALI0B05852g	76.24944115	63.92308298	76.4673573	80.5550709	79.90074122	87.44051914	82.65049975	81.94347659	60.64375969	61.68988086	51.48686034	55.64992238	62.02390481	52.62943852	63.24201252	52.83062622
YALI1_B07915g	YALI0B05874g	51.33575715	46.60482934	40.87077057	35.31772847	41.87935928	44.21689458	30.63221038	55.80544443	57.18633352	62.14503462	59.11930268	56.5267081	72.32986626	60.42848987	65.53577287	67.66687251
YALI1_B07937g	YALI0B05896g	2703.172804	4316.651627	3299.292836	2759.843712	2931.470788	2554.027603	3020.415225	2427.302382	2354.978909	2428.633204	2334.274318	2775.726363	1481.91385	2351.397405	2527.750248	2167.272551
YALI1_B07957g	YALI0B05918g	26.36626052	24.57540396	28.65637277	24.43937663	27.13711349	28.52780927	29.20602397	28.08000656	19.71692552	19.38174869	15.5272489	16.64202819	15.75457887	14.82303955	17.9073943	15.80861883
YALI1_B07983g	YALI0B05940g	19.30485461	14.61742401	18.88428444	17.59513817	16.59029941	18.75537768	18.24882329	17.4163672	13.90668037	14.54935584	11.7588558	13.28063449	15.65899139	11.93120971	13.63712742	13.8614955
YALI1_B08094g	YALI0B05962g	209.4664519	264.1709184	189.9273712	177.3629977	194.2616545	199.0690446	159.2407626	228.3430664	306.6694301	254.1023676	295.0644746	273.5256349	295.1932105	286.6143949	267.5587194	302.9987545
YALI1_B08102g	NA	17.5108545	18.50576813	16.8957499	16.7011499	21.69350811	21.56581316	24.61581394	22.16530771	32.79192062	26.07209175	24.48107645	24.26462489	20.08531123	21.99638194	26.51691195	29.97887359
YALI1_B08110r	YALI0B05984r	0.450729846	0	0	0	0	0.609203762	0	0	0	0	0	0.341274612	0	0	0	0
YALI1_B08123g	YALI0B06006g	34.03869497	39.99030766	37.61344183	30.0392139	37.24192642	34.00107329	39.63602055	31.3890368	28.4132536	27.94373551	32.38819425	32.71432406	27.48722945	30.88524244	32.90062782	29.84496747
YALI1_B08134g	YALI0B06028g	0.136069387	0.241398326	0.244633273	0.143642637	0.29499926	0.367821139	0.120832343	0.462273827	0.219987727	0.35939818	0.155918009	0.103026298	0.280717138	0.05533681	0.320937792	0.182097102
YALI1_B08143r	YALI0B06050r	0	0	0.711524825	0	0	0	0.702890582	0	0	0	0	0	0	0.321898272	0	0.353090723
YALI1_B08156g	YALI0B06094g	19.98776092	21.40022214	19.77481623	17.14307707	20.55603659	22.49232881	20.69818922	23.45946137	25.39473437	31.15872337	29.8442774	26.6930761	26.41114067	27.18689509	33.23272902	28.70463875
YALI1_B08186g	YALI0B06105g	49.84103582	51.43323373	48.86195821	26.99175742	26.74741227	30.5709524	35.48726089	33.40979024	76.31574253	62.81151506	35.54737328	40.68219007	34.85880462	53.95476165	47.41429599	54.83605925
YALI1_B08193g	YALI0B06116g	102.3269432	129.8316714	118.6349058	118.2284394	120.8900055	118.6576627	137.8185388	107.7687597	92.25460333	113.7975375	107.259653	113.0301514	84.52568477	104.6752826	112.3323821	90.31361868
YALI1_B08207g	NA	15.76100492	13.02994745	12.75644148	12.03354611	13.86972329	16.03581515	13.01481272	17.73323409	37.23469696	40.70764068	28.789506	35.31641787	25.43659487	30.36919829	29.55141944	33.83090038
YALI1_B08214g	NA	120.0744309	89.49785475	114.0969586	121.9358409	118.9559934	136.6240969	144.839716	125.616171	205.2045521	173.020274	165.8240003	173.094483	162.5422409	175.8732938	197.3125544	179.8866459
YALI1_B08247g	YALI0B06138g	7.613602233	4.016349771	5.140804625	10.1830736	7.692998227	7.077628416	7.709411355	7.578383152	7.240678862	9.008418405	3.710749313	3.599686349	4.122250713	3.222399902	6.686252668	3.442447133
YALI1_B08263g	YALI0B06160g	0.091673867	0	0	0.387104735	0	0	0.108544308	0	6.7189472	15.17391301	0.280123881	0.462745236	4.097756529	1.491280132	6.301415385	0.954209393
YALI1_B08296r	YALI0B06182r	0	0	0	0	0.748482166	0	0	0.293224223	0	0	0	0	0	0	0	0
YALI1_B08321g	YALI0B06248g	10.23305342	7.270750848	8.24595589	10.26926471	9.29936542	10.30960212	8.585735514	13.27672021	40.74366107	34.24995545	33.73568842	36.72264832	42.30422695	30.36789873	35.64827859	35.23729012
YALI1_B08374g	NA	309.1814941	261.4043044	270.0009627	208.1442941	211.2383001	240.2595942	286.958819	293.7455103	314.9264736	346.4120537	333.6230726	271.9159927	340.7697012	295.3131278	343.5029377	336.2158245
YALI1_B08401g	YALI0B06347g	33.78138006	30.66797943	31.02029725	29.6558634	31.84760489	33.47931306	34.60802978	38.51424187	21.21509285	20.07180203	22.48316747	19.71401288	25.61530415	19.6067558	23.7865328	24.17417675
YALI1_B08438g	YALI0B06369g	11.81279306	26.91973644	21.76571968	11.29902086	13.03502953	10.96015455	15.15543766	10.98920061	14.77202658	15.85905455	17.12558263	16.2823507	14.87800832	13.70875568	15.84420296	14.60045229
YALI1_B08461g	YALI0B06391g	1.238268807	1.335648982	1.228878956	1.087579969	1.868463722	1.365687554	0.985248338	1.371422937	13.9976257	15.96063623	2.792388746	1.980142801	2.084556111	2.183523629	3.177636818	1.838313605
YALI1_B08493g	YALI0B06413g	10.59097145	3.803784025	8.629566788	4.693391569	5.15708131	6.315306011	15.31455057	11.43651229	31.08651183	26.66485178	6.3599854	8.812389448	12.09325022	33.32854939	44.86515895	32.14943411
YALI1_B08531g	YALI0B06490g	5.142753648	4.629251043	4.591084771	5.503867811	6.074566736	6.303760891	4.866076933	6.559409842	6.9669392	6.862001243	5.852293022	6.243646993	6.585347945	6.245530086	6.525033597	7.190895166
YALI1_B08540g	YALI0B06512g	9.775791528	26.93734412	20.74920701	8.483433318	8.822479065	9.95996131	10.93681741	9.322805438	18.21911643	17.21377481	21.95670249	20.46870574	18.9292307	17.58041001	18.12785232	17.62661942
YALI1_B08575g	NA	74.12206318	73.12785773	63.20712193	52.5534178	53.36626925	59.67710318	63.81242358	77.01723711	93.69120176	61.51759978	40.34855794	50.39720591	57.04501659	49.55919523	49.69015269	55.69105413
YALI1_B08580g	YALI0B06534g	47.57499513	51.30699735	51.4984243	41.9495131	40.56315085	43.86267084	45.67832472	51.3760754	46.22099287	36.7356283	39.08371286	27.66413791	41.33201801	35.55333571	36.15181768	45.0058563
YALI1_B08588g	NA	6.094375377	5.946558772	6.437128344	4.020982281	6.028268336	6.383768995	8.726733075	5.952589387	3.694864295	2.51515452	2.182303125	2.19184821	3.693308403	1.982772457	3.64493635	2.922530256
YALI1_B08616g	YALI0B06556g	129.9421165	106.989084	123.0345009	105.7008362	102.3184249	95.83815275	114.9811844	125.966623	116.4513083	109.2362281	74.90196593	97.98743239	78.7899404	92.78717699	112.904126	91.3916488
YALI1_B08627g	YALI0B06578g	168.8083753	213.8095069	184.5115299	176.8945356	161.7023414	154.9628116	171.3814381	177.6384715	159.294935	163.3344549	131.5342203	182.7492939	102.7009014	145.3162252	156.6161823	127.831586
YALI1_B08650g	YALI0B06600g	69.80935136	62.81286188	78.79532921	70.09051842	71.24760064	76.4345891	85.99711263	68.04074092	53.05509875	58.72476614	64.58556868	65.73792953	61.98901189	55.59215748	62.24064848	57.24741845
YALI1_B08680r	YALI0B06622r	0	0	0	0	0	0	0	0	0	0	0	0	0	0	0	0
YALI1_B08699g	YALI0B06666g	1.092542169	0.615320636	0.897242859	1.338455648	2.222425849	0.911526825	1.245688048	1.741308269	0.785043486	0.534391933	0.247291406	0.612762395	1.057414556	0.789895012	0.327226206	0.649827814
YALI1_B08721g	YALI0B06688g	5.928831046	7.592110001	10.62178854	10.84861019	8.929967994	11.69671222	10.7884693	7.756532551	26.8389258	29.45129859	37.71086947	23.91022433	29.48420687	24.73746954	31.03803492	27.11600948
YALI1_B08758g	YALI0B06710g	6.667279137	5.853281571	5.54433287	10.10116458	9.726722947	9.400998723	7.74636193	10.53402378	6.865140989	7.688599529	8.234298711	7.870532073	12.38732931	6.673147488	8.895457451	10.08827651
YALI1_B08783g	YALI0B06732g	36.2176065	39.97744387	43.5188296	45.02581073	45.93023549	44.54624493	43.36500183	43.19408595	46.65254022	46.9028628	57.2767845	60.16361153	46.95267561	55.53372272	56.2740303	52.04098697
YALI1_B08801g	YALI0B06754g	36.16257646	30.26776295	34.86531233	35.34908161	34.55994161	34.78890225	32.34238576	40.62899114	49.39111393	47.99117048	36.47012344	40.62368342	40.40052134	47.02141145	46.23024798	46.08543665
YALI1_B08817g	YALI0B06776g	7.257479177	6.306302303	5.255095588	6.725162512	7.257799354	6.787064541	9.029357311	6.980948665	11.43047087	9.634029285	12.76763247	10.29025711	15.48790358	10.87119108	12.08805681	13.49600268
YALI1_B08831g	YALI0B06787g	9.248976432	8.361865598	7.487612905	8.10790867	6.918470153	7.968385202	9.36601701	11.30086155	20.11237798	18.28617942	15.55632959	14.29258073	20.75482161	14.36363741	17.31344766	19.73659444
YALI1_B08851g	YALI0B06809g	76.08319794	67.07769781	74.92243464	75.50523936	80.6317264	77.97808149	76.62065197	76.46566307	80.78263619	80.61429544	89.3655208	91.63710857	98.72621235	85.93253212	93.20622953	84.65434152
YALI1_B08868g	NA	7.748717346	7.349808618	4.000014263	4.373459876	5.987857327	7.154903754	8.924882548	9.513497007	7.194066745	5.775222889	3.868093595	3.543447031	4.352608817	2.714447133	5.325226157	5.783843072
YALI1_B08885g	YALI0B06831g	1751.520901	1881.725672	1650.966728	1420.222755	1410.525213	1390.141031	1427.194839	1655.056359	1757.696349	1714.329321	1383.041633	1554.731444	1230.020425	1680.225324	1455.462211	1594.347579
YALI1_B08898g	YALI0B06853g	29.22809691	24.66029804	28.12529923	26.52858525	26.32386188	31.09750894	30.01312749	28.14614204	26.34564562	27.61975017	26.82509384	30.90372868	33.93330359	25.04203483	33.19695876	29.61540894
YALI1_B08975g	YALI0B06875g	14.53771935	17.01221249	18.06954462	14.79291374	15.39431075	16.23027932	16.80482577	13.27872944	9.494974029	9.692854939	10.44519762	11.58296219	9.853904764	8.431946411	11.24762075	9.59112686
YALI1_B08978g	YALI0B06897g	20.32860947	16.60141387	17.48855042	16.84828692	18.47330753	17.63504304	18.01526585	19.77474084	13.23784611	14.30805625	11.34663329	13.83579779	14.05971786	12.26382895	14.90498587	13.69720397
YALI1_B09002g	YALI0B06919g	1.810707371	1.350072837	1.533184881	1.973147244	1.570249843	2.336816157	2.033271677	1.88516365	2.455262595	2.838702259	1.79373062	1.769026065	2.144939644	1.966847111	2.298750355	2.647290705
YALI1_B09025g	YALI0B06941g	123.0492478	115.0121691	118.2841979	128.0023679	114.1384177	124.8767842	125.8250961	121.0779698	92.89252266	114.2300719	112.1181484	120.0055806	99.87777716	123.5944248	128.409315	121.3710771
YALI1_B09044g	YALI0B06963g	49.10701668	51.43918141	46.61525242	56.88383108	57.2386143	50.99035485	47.87075361	52.91536543	52.10271831	59.82295026	50.71817949	61.94134201	51.07341294	64.46772941	59.44283698	60.35987828
YALI1_B09072g	YALI0B06985g	38.20691458	44.91661529	42.09665776	38.16259042	44.54465269	47.92662437	55.08970437	45.27800446	40.50972089	38.97862726	36.27559515	33.05021095	42.6376149	37.30249053	42.69117144	44.07767993
YALI1_B09090g	YALI0B07007g	446.4611688	338.4526249	384.1524854	555.6414075	547.2811094	622.6779154	498.6262148	487.0377681	253.9337748	240.972516	252.8313704	268.7637941	287.9879184	303.1618993	295.2398444	319.836154
YALI1_B09117g	YALI0B07029g	0.583297447	0.537567702	0.238337564	0.671740569	0.862222103	1.003394431	1.177226874	0.78815988	0.685844091	0.140059585	0.364572993	0.160599817	0.10939712	0.172520643	0.14293868	0.094619083
YALI1_B09132g	YALI0B07051g	8.839456172	5.765183213	8.446138491	12.59417604	8.576892781	10.527041	11.1431587	9.660202206	1.399121946	3.102119723	0.708313243	0.936067506	1.466546534	0.854716555	1.707913033	0.772091714
YALI1_B09144g	YALI0B07073g	29.3384154	26.91748091	25.762743	26.64570925	27.05660424	26.39355518	25.36694584	29.83016986	40.20204294	36.98300627	25.00560387	28.96845275	29.70771142	28.20488455	35.53418468	31.48112049
YALI1_B09161g	YALI0B07095g	101.263972	104.2203538	101.7984639	85.92275807	97.1520209	93.79972121	89.93603847	100.0659533	96.31636587	96.65532262	85.87014893	73.89337243	81.12827001	103.7549146	91.24666747	104.1461272
YALI1_B09181g	NA	0.245852643	0.178025667	0.252575912	0	0.152288579	0.189881692	0.561399621	0.05966034	0	0.371066953	0	0.106371308	0	0.228533838	0.094673671	0.094004673
YALI1_B09211g	YALI0B07117g	12.88180565	8.305898121	12.34221907	9.696515495	11.13644027	17.73539945	31.31952889	9.174101055	0.620912106	1.47932757	1.943670215	0.557347886	1.386559947	1.314576672	1.272492572	0.97082538
YALI1_B09238r	YALI0B07128r	0.272710495	0.276463389	0.245147209	1.151555262	0	0	0	0	0	0.360153219	0	0	0.28130688	0.332718382	0	0
YALI1_B09239r	YALI0B07139r	0	0.456932546	0	0	0	0	0.400257137	0	0	0	0	0	0	0	1.214978783	0
YALI1_B09258g	YALI0B07161g	46.9112553	90.38304956	79.38229793	45.15589382	57.28986861	44.91384596	64.22949825	42.21534443	43.43679245	41.78444287	45.93619707	41.64888594	32.52741035	41.82187913	48.527682	39.04614143
YALI1_B09266g	YALI0B07183g	641.8534964	558.8968642	589.5758193	554.7043206	492.8705949	563.3072137	537.4161183	570.9029441	899.23881	906.6597326	648.5667419	658.2784178	591.488693	776.1432028	671.4144959	586.4401337
YALI1_B09279g	YALI0B07205g	23.43795197	32.66074375	33.82320906	30.36948849	24.81200301	29.24178056	27.3567052	25.16628765	41.06118755	39.75256396	38.35413556	42.9115729	28.46227679	42.46258079	38.19259393	31.89074472
YALI1_B09299g	YALI0B07227g	31.69833958	33.57635014	34.59635911	30.34608093	32.56245322	29.70778503	39.45801834	34.66432121	36.9986929	33.86540325	32.29739069	32.33814886	33.11986912	35.63238605	33.39981516	34.27887267
YALI1_B09310g	YALI0B07249g	27.3984634	25.66312957	27.97692282	32.48030834	36.71652679	28.88225047	29.0547312	36.56249688	32.25434815	36.88618416	30.88710206	41.5571773	32.4694239	42.4782589	44.15750759	36.98287668
YALI1_B09316g	NA	16.02344601	14.8046145	13.24918517	14.41723197	13.19199817	12.97604012	17.29110833	14.06865386	13.99121946	11.25028617	6.352684396	8.395355446	8.926804992	8.028679409	5.558527934	10.67658074
YALI1_B09320g	YALI0B07271g	96.05629131	88.72049682	91.10014335	98.56908984	100.8631306	101.9065059	111.3015787	106.1765646	63.90726183	63.26691541	82.94720869	76.79448554	91.86890476	56.1651978	59.52482521	65.34479217
YALI1_B09333g	YALI0B07293g	83.84363577	68.78766462	75.38360045	65.45455774	71.92993627	77.02608961	72.81645877	77.02393368	34.62112979	32.57059108	32.56072611	38.42175044	38.71318491	32.05187083	37.44826734	37.05702579
YALI1_B09340r	YALI0B07315r	0	0.186926951	0.663011768	0	0	0	0	0	0	0	0	0	0	0	0	0
YALI1_B09367g	YALI0B07359g	144.4157271	113.3511135	112.6242151	148.5342448	145.1681595	147.6353311	119.7926378	159.360043	193.0495787	201.8966238	188.4372365	205.4211558	196.6929724	222.0791509	216.7403615	218.1764391
YALI1_B09426g	NA	0.49972222	0.178799692	0.211395057	0.124125975	0.509835678	0.15892272	0.626489432	0.299598662	0.190098091	0.155283453	0	0	0.121288111	0.334727551	0.039618873	0
YALI1_B09448g	YALI0B07381g	28.4702764	44.2632064	39.15315211	29.69093316	31.28710287	31.90888802	30.14859913	32.28817585	45.24083876	47.25394923	54.0769918	49.21554927	50.1764918	48.09230935	48.65789756	47.82090027
YALI1_B09476g	NA	1.616031398	2.206649858	1.482343385	1.253369599	0.572010761	1.60473186	1.698652241	1.484596624	2.026167453	1.829314824	1.587226321	2.097590296	3.129824921	2.038689058	1.955819505	2.559907742
YALI1_B09497g	YALI0B07403g	111.5538623	57.62387136	93.51540269	111.9779187	107.5672992	115.6623709	106.2477843	92.62447817	17.07589777	12.82372327	13.46910615	10.29735679	21.49696478	11.06169759	16.28262905	18.73234326
YALI1_B09518g	NA	1.483046589	1.798250666	0.888768464	1.043725938	1.323928132	1.179104055	1.652674631	1.284301076	0.658189088	0.460841215	0.39985425	0.924744109	1.379815288	0.473040472	0.58789296	0.804262202
YALI1_B09568g	YALI0B07425g	104.2751636	134.8576288	122.3710352	119.4849699	126.026013	118.3522592	117.2964074	139.5320325	160.1626439	175.0420464	156.2483094	175.5803991	126.8545973	148.5797715	151.1305714	137.5796321
YALI1_B09580g	NA	5.803146762	4.283742622	2.127162757	6.185611075	6.96244348	5.635134795	3.802442803	5.31163462	2.186128041	1.934573018	1.420315617	3.327427463	2.67339212	1.28312228	2.429957567	1.256659691
YALI1_B09591g	NA	2.392335334	2.390108704	3.490728627	2.854897419	1.879202019	2.717986014	2.647854907	1.855207102	2.242182606	1.923125841	1.032956812	1.732624951	1.85975104	2.143237215	3.831856163	2.505586092
YALI1_B09592g	YALI0B07447g	170.8236265	164.9405451	186.7073339	193.1309744	184.0473034	194.5256197	177.1734242	165.0438106	142.4892197	160.6001116	172.9005525	191.6652461	162.0200327	160.2021261	178.2880787	151.3424394
YALI1_B09672r	YALI0B07469r	0	0	0	0	0	0	0	0	0	0	0	0	0	0	0	0
YALI1_B09708g	YALI0B07513g	8.05958516	19.18438082	15.62125748	8.691890657	9.418709367	8.92091449	9.130618258	8.505437935	11.25531269	13.38435742	13.65343905	13.82669021	13.68574218	11.59165771	10.98894177	11.03073481
YALI1_B09807g	YALI0B07535g	20.40926939	14.45798572	18.38949917	26.34985736	23.26294475	27.03655201	21.84766391	25.46323499	26.25708847	27.64869977	28.99274088	31.12361429	36.50235477	25.87600544	27.8860771	30.99395678
YALI1_B09837g	YALI0B07557g	98.83087617	88.16577756	97.19198603	91.73639687	90.97567822	99.95304275	96.24597452	94.12685036	75.099928	75.92447418	69.82365358	70.60456748	71.34594783	69.56144826	71.38854877	73.41412343
YALI1_B09871g	NA	37.11190078	29.89329791	31.51569194	24.97175333	27.47891453	38.48993405	33.73733653	33.18085267	31.81738161	32.0145837	23.59621827	27.58156741	36.02987557	22.84443522	32.14570371	27.87785971
YALI1_B09894g	YALI0B07579g	52.14018435	52.1274425	60.60596063	70.66998894	72.43522047	68.96241589	62.29916506	70.50465017	65.67266811	74.51011843	102.0178927	97.53828697	106.1821288	93.50696721	102.5272051	96.55503605
YALI1_B09929g	NA	15.01725791	12.06301922	16.8170985	13.70350761	11.86417613	16.85702644	21.47261818	15.72716743	11.93368719	9.412004114	5.833167882	4.817994517	6.038721024	5.848449787	5.488845327	9.253746281
YALI1_B09931g	NA	9.511953983	7.373945921	10.2830331	8.269358042	11.86100474	7.394473245	10.82074467	11.08859417	9.850140139	7.55355831	3.846873646	5.272104345	7.695521545	4.80380755	8.127789103	4.603707779
YALI1_B09957g	NA	17.97616678	11.71897589	14.96759901	14.44242224	17.5893309	15.76762677	19.49487703	20.13185522	19.5465566	12.32524348	12.63853041	12.44648584	18.0505248	10.82567033	12.22125717	14.4294101
YALI1_B09993g	YALI0B07601g	49.66555623	59.64822159	54.13998801	65.39258278	59.85918691	62.58333778	43.32513066	81.05965703	115.3921098	119.2115265	143.2180662	114.834295	142.4217452	134.3116916	138.9016285	147.7179692
YALI1_B09994g	NA	135.3757293	172.1245035	149.8086301	186.1889621	196.966517	202.1497004	152.0281022	205.6578374	311.7608685	290.2765348	418.9313542	263.2859439	412.8647309	292.3287281	354.1399028	433.532295
YALI1_B10032g	YALI0B07623g	75.03232755	90.06980692	87.06849425	112.6042495	107.603581	106.962063	68.26753469	138.9686677	88.3996024	83.67731138	100.1838013	91.4306491	138.9707163	108.3234084	113.1552281	129.4234132
YALI1_B10094g	YALI0B07645g	6.482145718	6.839856261	8.09512307	3.266944469	3.959110563	4.220463173	5.966719797	4.700404445	7.52749243	7.548056503	5.910216813	3.546441325	5.262903716	10.3745822	7.759580993	8.942234899
YALI1_B10119g	NA	2.065162202	1.827730185	1.650162624	2.076289032	1.492428076	2.12667495	1.921234258	2.115953382	3.285816692	3.723038424	4.657696172	4.070475368	2.028819316	4.026004452	3.18103536	5.001048603
YALI1_B10130g	YALI0B07667g	35.99993889	43.72878653	39.01793945	35.2839691	40.38381707	37.62782735	34.28037686	43.42960295	43.56991348	40.79191755	39.56662503	39.60487613	37.98344393	38.84747554	43.08478379	41.79355554
YALI1_B10145g	YALI0B07689g	5.615504759	5.510234653	6.594691655	5.702754401	6.694500785	7.103120555	6.360683087	6.525414024	5.369626459	4.474307927	3.729343461	4.948692272	4.678042073	4.263663676	5.474146084	4.694669871
YALI1_B10170g	NA	23.41422935	20.77840632	25.84582719	14.87551813	15.58353001	12.11994852	21.99307638	20.12829961	15.6480744	11.46645708	7.176331539	11.96257323	10.57121644	12.38743615	11.03072843	11.49248358
YALI1_B10182g	YALI0B07711g	34.9488988	33.0101391	34.25113428	26.49159872	20.74639029	26.6372495	19.21234258	38.46183747	48.36033853	41.06524351	35.27944805	34.45353731	45.8537807	42.92411375	38.48580567	46.28252204
YALI1_B10185g	NA	1.205212413	1.549597331	1.426916632	1.551574684	1.465777575	2.781147608	3.184654613	2.896120404	1.900980905	1.863401436	2.155735956	1.379936473	2.547050337	1.48236487	2.416751276	2.753723845
YALI1_B10231g	YALI0B07755g	18.9080794	60.2967883	81.52720337	103.8439148	109.6470143	91.45989295	60.76424545	67.41219988	75.00718448	101.3619868	119.1125091	112.7265936	84.05205368	102.2850121	136.0370568	107.0165519
YALI1_B10263g	YALI0B07777g	0.285272054	0.196654514	0.266696717	0.36137942	0.346344068	0.493532161	0.364791315	0.329516391	0.479656785	0.301394044	0.078452416	0.069118909	0.423740743	0.083530564	0.276830609	0.111985876
YALI1_B10288g	YALI0B07876g	0.069983932	0	0	0	0	0.05405135	0.017756324	0.033965591	0	0	0	0	0	0	0.026949622	0
YALI1_B10359g	YALI0B07898g	0.219502152	0.136937121	0.242851345	0.332724777	0.402669386	0.44121313	0.289884461	0.415884095	0.05459633	0.312182759	0.103188194	0.178982731	0.046445395	0.086978409	0.182057175	0.070299714
YALI1_B10424g	YALI0B07942g	0.304242646	0.034269941	0.060776079	0.178431089	0.146577757	0.228451411	0.120077141	0.244048077	0.218612804	0.089287985	0.077471761	0.051191192	0	0.123729648	0.045561704	0.090479498
YALI1_B10437g	YALI0B07942g	0.159081122	0.184308926	0.367720813	0.335870285	0.295619007	0.921484681	0.242172386	0.675565611	0.661349659	0.660280901	0.208327424	0.619456438	0.51572928	0.628468055	0.306297172	0.405510354
YALI1_B10449g	YALI0B08008g	76.55932803	83.61108252	76.88006076	108.7700144	101.1953402	103.9617999	91.28516366	105.1762347	104.2577749	101.5811158	114.367152	109.9168219	109.6122878	126.8498534	120.7863438	126.1847404
YALI1_B10463g	YALI0B08030g	58.3686834	49.14638325	50.63028614	48.33309727	50.90737466	53.8437214	50.91979727	67.57700261	80.37852325	83.68689412	68.12940983	82.32903694	78.00660543	75.94839329	78.97810424	82.24842316
YALI1_B10525g	YALI0B08052g	58.60786926	47.04166653	53.58103176	54.23482359	36.90211208	32.31764508	39.25518989	37.74367549	5.594471759	5.063941077	4.465231177	7.152014339	7.814170076	3.080761275	5.588202128	3.268039496
YALI1_B10552g	YALI0B08074g	64.86124297	82.69244136	79.55424452	83.05436708	86.90080238	77.84636176	100.6311349	58.67707281	50.29276185	57.49180988	77.8570259	72.87412031	41.64837059	64.49101387	74.15967796	59.3936768
YALI1_B10582g	YALI0B08096g	24.57297167	23.50917951	26.20001505	23.77350942	23.90549972	25.38718221	25.22711575	27.2394196	24.98148134	27.80914893	25.81922505	30.46341283	31.99194459	26.67561228	31.9346128	30.03919326
YALI1_B10607g	YALI0B08118g	437.974752	366.7367161	380.7760036	393.9995359	412.0720425	476.3619522	368.621876	432.0312164	578.1537628	587.3889779	788.7846809	613.6485697	879.6699587	598.1190462	644.3823989	644.1439431
YALI1_B10635g	YALI0B08140g	176.6297582	810.9338971	752.0659898	764.3541762	706.9628465	637.0367585	543.6117325	625.785926	931.358862	990.7060036	936.5367499	953.9798526	820.455324	995.1988055	1073.803944	1152.312954
YALI1_B10751g	YALI0B08162g	4.497169695	7.187702976	6.300681126	4.619159869	3.996577058	3.833192208	5.90041982	5.436911557	7.008710124	5.350590889	5.524578008	7.730445135	7.021082578	5.058344012	6.716511926	5.114746141
YALI1_B10757g	NA	2.274136948	1.308488655	0.994517653	0.259536129	1.332525068	1.329171844	2.292381786	1.51388112	7.552078687	8.766456754	7.606318346	6.049868115	9.256488131	4.89919416	6.130120225	5.538441984
YALI1_B10762g	NA	14.32429355	13.01504572	10.68590396	10.41566971	7.731574021	11.88951517	12.35079166	11.96419274	14.02965688	8.163472956	4.22263664	7.020506296	11.03588529	6.574742734	9.212476489	6.734591189
YALI1_B10773g	NA	10.48594491	9.600835572	9.053540011	5.68791823	7.547912109	8.122716822	8.75965045	6.793964049	7.839907458	3.995722874	4.036842715	4.989670184	7.481757057	3.826190575	5.334734428	5.195348939
YALI1_B10780g	NA	3.309305972	4.184540161	4.222338105	3.906701732	2.700116585	2.597131826	4.107902197	3.596497979	3.796959229	2.161709122	3.751264213	3.287013365	2.936449011	2.344351233	3.932694483	2.793752913
YALI1_B10782g	NA	5.671886922	4.860774331	6.307571419	3.1481031	3.042478858	3.319337253	5.400226024	3.20327651	2.836057999	2.239439203	1.541059893	2.25794662	3.618974997	3.376741876	2.955353797	3.286606621
YALI1_B10813g	YALI0B08184g	138.4755358	417.6219935	483.2727107	527.1744959	440.3779076	354.4991774	344.6654024	349.7335967	471.7763509	517.6147619	541.8750826	593.996502	474.1878306	550.4162715	576.9050043	538.5946061
YALI1_B10891g	YALI0B08206g	65.8897018	58.01268843	75.38594005	91.68932682	86.43818436	90.67081229	90.58246473	83.4920389	36.29397039	33.04522336	41.48876051	41.21139436	54.4112598	31.35018319	38.09489302	35.58274617
YALI1_B10933g	NA	10.95444688	9.994676457	10.15499038	13.5878662	17.81198066	20.82088806	20.18511942	14.77008765	23.57697584	17.17946049	17.88715088	19.18049716	25.21257423	16.01002483	18.8244814	18.41658638
YALI1_B10943g	NA	26.00649465	19.00338645	21.04683934	29.40935424	50.59944505	41.65952299	41.18810431	32.2198525	37.85295677	23.4839633	36.33743965	23.1131737	35.15693747	22.23743818	18.27461239	27.4330532
YALI1_B10990g	YALI0B08228g	17.37881183	17.67316956	18.35519158	18.31732841	20.48153631	22.44650102	18.79328142	20.28691793	26.23353649	33.19835164	30.21918621	29.47788088	29.26299539	32.13095657	30.46824311	30.99378232
YALI1_B11034g	NA	16.85846695	15.5238382	13.51281128	10.08483244	8.223583277	9.683966289	13.34883543	8.531428579	23.62153935	10.9464751	15.93704796	12.87092821	18.98395217	12.79789495	12.68627197	17.98622743
YALI1_B11083g	YALI0B08250g	272.1072772	275.7616123	281.65419	267.8042594	270.8933897	273.3043509	269.0386821	251.4579384	200.5839951	208.3729272	250.2561048	260.1439459	230.119318	220.247449	250.5556247	212.2656464
YALI1_B11111g	NA	69.80678484	61.24038453	55.73166424	80.57947966	78.34581137	81.69422444	65.98238906	99.08351931	78.80991588	65.80524528	55.3148373	69.67121196	75.66862044	66.8690011	65.47216919	72.77567603
YALI1_B11120g	NA	129.2734485	105.5618823	110.6031846	108.6168606	124.5127699	134.1550391	106.2545206	150.8254376	114.9469462	112.1075408	95.37897407	96.0362388	123.2546453	94.16466407	111.9078931	122.5548251
YALI1_B11131g	YALI0B08272g	165.275928	93.08775294	152.816438	221.5031599	202.6593881	277.5776863	226.0386396	189.6776295	90.3297012	89.01198569	102.037547	103.4357293	148.5226782	93.75482102	126.4586914	102.1997409
YALI1_B11167g	YALI0B08294g	46.68307834	34.59981207	50.23289164	39.26628964	43.14245867	50.97764953	47.77400696	56.67381329	34.88452446	28.57215535	21.27780557	22.90737393	25.12155683	23.9254764	24.91031367	25.44393149
YALI1_B11183g	YALI0B08316g	76.85552962	70.65165129	80.02731238	76.69643337	82.00431297	82.39069252	76.71955721	81.6028483	105.6431605	97.78241002	75.46168281	78.19800425	75.1691265	100.5888601	92.65034155	101.1088009
YALI1_B11200g	YALI0B08338g	19.87053795	19.95885991	28.54667425	14.22930514	16.15788574	14.68568004	21.52114805	15.24528772	11.68395253	10.64446935	11.639564	8.887110629	9.960008735	7.953787739	9.288088492	9.42916395
YALI1_B11359r	YALI0B08349r	0	0	0	0	0	0	0	0.231622495	0	0	0	0	0	0.221812255	0.367556607	0
YALI1_B11388g	YALI0B08360g	8.42627585	8.181497488	7.907287723	6.040361908	7.251741686	6.579400626	10.76902361	4.666380571	4.69442232	4.624177773	5.153910832	4.979016965	4.698318417	4.121427353	3.81759123	4.647788938
YALI1_B11398g	YALI0B08382g	21.94949527	23.36731789	23.74507264	25.49489788	19.97548044	20.99627848	26.75207005	20.27168159	18.09910657	18.35594864	16.93568727	18.38120931	17.38650972	16.11362863	22.50536281	17.28228546
YALI1_B11402g	YALI0B08404g	40.85805141	31.77286636	32.43142971	35.43159175	36.92174864	36.47319386	35.28320753	37.54538049	23.20840796	22.31716999	19.96677601	23.57561912	22.28685436	22.29363035	24.72646011	22.09330007
YALI1_B11415g	YALI0B08426g	2.7774704	1.630137733	2.943533329	2.222190424	2.281859143	2.924178056	3.011664513	3.079118506	2.930593266	3.320547784	1.541059893	3.276236272	3.196761247	2.116408641	2.088450017	1.799808388
YALI1_B11448g	YALI0B08448g	0.927779682	1.660966482	0.408131332	1.125288034	1.198299915	1.173940095	1.156947637	1.450247053	0.893599783	0.312833818	0.316672891	0.269034	0.223984614	0.256892052	0.41238331	0.378648993
YALI1_B11484g	YALI0B08470g	84.59138661	103.7774448	92.6477695	122.8025728	114.5893175	111.6993015	90.05785586	134.7922286	129.1422991	130.9644657	156.2878848	154.8834675	176.915655	165.0375598	169.1009257	168.1144551
YALI1_B11495g	YALI0B08492g	12.06134221	18.78040529	17.2798886	12.53369599	12.01222598	12.07369685	14.86111517	15.04604665	25.16713257	20.25935057	19.34904468	19.46335485	19.78982466	21.96572496	18.3897834	21.13500185
YALI1_B11519g	YALI0B08514g	73.73940274	78.40962495	76.75613576	68.63173396	73.64066536	68.182085	73.07094296	69.64270775	66.63318269	58.81101975	54.16825524	62.03007341	50.39925318	51.76481884	62.69290522	53.3547545
YALI1_B11532g	YALI0B08536g	226.2595011	231.661313	259.9298555	247.7150178	228.9149222	226.8284174	266.430705	260.1543005	221.7501482	231.7398096	284.8437549	250.948861	276.3220935	272.0499086	245.9636438	273.8052343
YALI1_B11577g	NA	2.277371851	1.515092127	2.047194233	2.103608625	2.468678021	3.078082164	2.401542823	1.329797572	2.761424894	1.879747062	1.304787552	0.96993837	3.376916362	1.678671253	2.397984441	2.349292223
YALI1_B11588g	NA	2.266527224	1.879951048	2.037445689	1.740127951	1.340139497	1.253219167	2.378670987	1.312527474	2.498432047	2.993273417	2.124939728	4.290309403	2.12542976	3.100442407	2.638239644	3.263006649
YALI1_B11593g	NA	15.51040939	12.41781391	17.44630967	9.404367969	12.24355386	16.12598193	18.50600646	16.48380092	20.83251427	24.3703678	14.40063321	15.89938191	12.96355872	13.52130537	16.29500957	14.90250551
YALI1_B11607g	YALI0B08558g	2.281244933	4.078200686	2.712184196	6.680848382	8.269511578	6.630789242	6.273417987	7.323069952	71.70103398	73.14730927	101.0751754	69.05355135	106.8281482	71.96458019	89.858839	105.5388972
YALI1_B11625g	NA	0.679360927	0.609243395	0.375813434	0.2206684	0.566484087	0.423793921	0.324846372	0.710159792	0.844880402	0.69014868	0.479052435	0.395680709	0.539058272	0.807596632	0.528251645	0.419615062
YALI1_B11639r	YALI0B08580r	0.676094768	3.084294688	1.823282363	2.498035242	1.832221968	2.284514106	4.502892793	3.014711541	1.639596031	0	0	0.511911917	0	3.711889453	0.455617044	4.071577399
YALI1_B11648g	YALI0B08624g	50.13290902	59.82373077	60.76122515	35.46817568	41.34030113	37.3115591	47.22871181	32.82120636	20.90846697	17.48662461	16.56096951	21.81933321	11.24941057	15.99329603	25.04687423	16.03937981
YALI1_B11666r	YALI0B08646r	0	0	0	0	0.868608933	0	0.711568244	0	0	0	0	1.516776052	0.826556018	0.325872325	0	0.714899735
YALI1_B11681g	YALI0B08690g	34.20573256	25.88444094	28.09950566	29.17902052	36.06823715	37.81264727	33.15785332	34.48552788	37.57124882	32.02051892	30.30481572	29.11896203	34.05268284	27.68510141	25.18776705	28.02160446
YALI1_B11715g	YALI0B08712g	84.23754474	84.11214313	86.07281923	84.7333554	95.58544962	90.3988759	90.76459561	85.60304183	88.39452582	93.10440906	122.750685	89.53485696	110.5010932	93.94340493	105.3490746	103.0880312
YALI1_B11719g	NA	0.593644187	0.53494542	0.948699766	0	0.429008071	0.17830354	0.468593722	0.728292684	0	0	0	0.199770504	0.544317378	0.375547984	0.088900887	0.353090723
YALI1_B11729g	NA	7.301823499	9.961129511	7.455198997	4.758162365	8.696946944	5.726515359	6.404114195	7.656410263	18.50921741	13.80987508	16.11412627	13.92400415	14.32008301	20.49329584	17.86018812	21.71507946
YALI1_B11759g	YALI0B08734g	85.55117006	78.17569199	84.81761387	70.6055443	73.71901663	80.03534747	102.697127	69.48840429	39.399653	36.18279718	42.95048416	42.89428979	35.94399188	36.64408549	49.76202042	36.79635737
YALI1_B11781g	NA	39.07827761	41.63797829	51.29501049	24.48074537	24.4784855	24.21584953	31.76040383	28.22344233	31.9174694	29.64361117	19.75529904	36.44812852	12.83228218	30.54747542	28.70387376	26.35969368
YALI1_B11794g	YALI0B08756g	82.59135867	94.48725992	92.97125024	68.34185207	78.75428156	76.04907825	96.19606497	60.43317057	38.08449074	40.30072541	40.58436752	45.31744997	35.33266871	33.34220804	45.08505885	36.46513577
YALI1_B11853g	YALI0B08778g	75.27725005	80.56699933	93.73021927	82.19159038	83.59585438	94.07846662	86.49366136	93.31250008	80.7132353	90.93201821	92.4250405	92.05476369	86.19060475	92.74704616	99.62102822	82.72411224
YALI1_B11878g	YALI0B08800g	29.35152755	28.13485999	31.93850469	26.13817193	29.00285228	30.24899744	28.02867313	28.15517267	22.69686713	21.68309122	32.6965263	25.80946129	41.21208305	23.14996997	30.21247241	29.60757254
YALI1_B11916g	YALI0B08844g	208.2801153	226.9286589	227.1031634	192.8037601	183.5246589	208.0189098	217.5874037	222.8136917	154.5326488	133.2611372	128.1522293	140.4967988	117.8432722	147.9925888	145.5274587	141.8820653
YALI1_B11934g	YALI0B08866g	1999.823246	2464.005091	2388.298392	1617.429156	1641.54547	1617.054828	2128.974134	1511.031462	1449.718535	1699.890451	1440.394751	1524.150665	986.0658589	1565.366051	1634.062	1389.378008
YALI1_B11960g	YALI0B08899g	239.1240444	143.108067	206.0273529	310.0652332	232.2614571	283.4400659	219.2004701	233.7219975	215.4934167	210.6987596	190.9339118	208.1176404	210.5107668	203.11279	207.1858557	186.5888309
YALI1_B11978g	NA	1.044873733	1.121561705	0.552509807	2.076289032	0.666262534	0.664585922	2.838186973	1.827097904	0.397477826	0.811708959	0	0.093074894	0.507204829	0.249958886	0.828394625	1.261229363
YALI1_B11983g	YALI0B08921g	1653.451751	1090.680596	1226.625302	1189.889633	1120.036655	1186.214583	1414.101541	1162.05233	730.3634416	710.9424536	619.2165052	668.4258864	672.792288	721.4965501	776.711973	789.4070063
YALI1_B12010g	YALI0B08943g	129.7865765	120.5703321	124.184903	120.005426	126.9913846	124.1817974	130.2496151	130.0620156	110.3946929	110.7015058	116.1332144	116.0095234	108.8563447	108.8772879	110.669181	113.3377534
YALI1_B12042g	YALI0B08965g	91.28928385	102.4955425	82.96379456	91.63524399	103.8199531	101.7043392	106.9330873	114.5100189	102.6307135	94.49717719	84.16834436	88.81796624	78.59942932	97.38495732	90.00325758	95.61696778
YALI1_B12057g	YALI0B08987g	131.7418949	112.5098481	124.8861596	103.6463711	104.5308808	108.1945881	115.6857486	134.0746814	144.1595291	114.0845346	105.420621	99.61318378	104.8368229	101.6651824	107.2305561	116.3422723
YALI1_B12101g	YALI0B09009g	11.2519743	12.86669264	13.28736221	16.22241349	16.10767848	15.94046521	16.02184526	15.45655097	25.68108536	26.49629027	31.10057695	26.8411866	33.51580214	27.58282768	32.52809624	33.06475798
YALI1_B12150g	NA	46.43102773	23.9266497	32.32971671	38.41134709	40.66105065	45.76148776	38.79895158	57.21426578	153.9942662	140.634375	153.0922486	126.0499994	144.9156655	160.0308203	131.4070559	169.2084114
YALI1_B12154g	YALI0B09031g	18.14881881	13.22722272	12.62759855	23.48863469	28.23184864	25.98499457	16.93599868	35.64040834	97.22571345	97.70052172	81.77493173	94.63819941	98.04677995	105.1656403	82.74523752	98.7984658
YALI1_B12195g	YALI0B09053g	19.03601893	19.52178604	18.94319339	17.73320326	19.68873774	19.96470361	19.83611994	18.86545171	13.33578664	13.09336247	15.01716063	15.05154001	16.01318103	14.20990759	16.41235718	14.66472899
YALI1_B12204g	YALI0B09075g	65.53964481	85.92374028	82.68262963	76.30072209	87.97940929	80.86414177	91.55378896	55.30580151	47.58187066	47.48724143	76.24260003	53.76505055	36.71709595	56.60074593	62.7580661	55.02231804
YALI1_B12221r	YALI0B09097r	0	0.456932546	0	0	0	0	0	0	0	0	0	0	0	0.366606366	0	0
YALI1_B12227r	YALI0B09108r	0	0	0	0	0	0	0	0.229692308	0	0	0	0	0	0	0	0
YALI1_B12243g	YALI0B09119g	43.74473679	58.47892376	58.38995097	45.67835871	57.84574411	51.83156254	54.64203208	36.70833188	26.57685452	29.85889213	32.46299377	34.14322442	23.86322582	29.50461578	40.05221052	28.4630808
YALI1_B12267g	YALI0B09141g	21.07162028	21.56150453	22.23391549	20.49974952	21.23341681	27.10956739	20.16295328	26.52627139	23.22761044	22.29719415	21.21865452	22.55256392	29.05861	19.89603297	24.23629552	22.94660596
YALI1_B12295g	YALI0B09163g	9.100823491	5.864629899	8.984289906	9.78112681	9.329992911	10.36176137	8.165245598	8.798214054	6.045119279	7.018812074	7.518129148	6.659306335	9.533245549	6.684987381	7.099702108	8.035628439
YALI1_B12313g	NA	20.29738272	17.51083436	15.78871036	23.3303445	17.90455188	20.12337587	17.24979146	21.93191069	19.74567263	28.87938282	24.39110925	35.14027614	15.47792801	35.00499492	30.49204818	28.43456044
YALI1_B12320r	YALI0B09185r	0	0	0	0	0	1.008337261	0	0.316816976	0	0	0.85486081	0	0	0.606796743	0	0.665596305
YALI1_B12337g	YALI0B09229g	291.9117518	259.5982072	284.2549528	372.2332476	403.3120972	390.0195102	356.8279124	379.1139993	248.4947132	243.8567232	261.0849649	284.9349194	270.5383533	263.6215391	296.4950542	264.3519313
YALI1_B12375g	YALI0B09251g	10.80610541	9.543527867	7.446992944	9.227221194	9.524461878	6.755221458	10.27495537	9.071392413	16.05005397	13.62301078	9.518893157	9.970402578	13.11242189	10.13504181	9.750589224	13.39758302
YALI1_B12384g	NA	5.599655494	5.22515806	4.118473103	4.970880212	2.621155193	6.708408481	8.136992153	5.296434394	10.28766137	5.042145061	2.333267153	4.239835175	4.59467904	5.486156437	5.317318911	4.712030315
YALI1_B12409g	YALI0B09273g	114.0964717	104.7959412	99.4969581	94.09058427	104.1908329	90.56930537	96.20544616	124.641013	174.1488133	160.1394492	219.3474775	187.5869945	221.8344433	237.8461648	217.8235778	256.2367343
YALI1_B12427g	YALI0B09295g	25.24704574	29.14353337	28.93940409	27.64948596	28.67301886	24.53505561	30.29891699	24.99870392	18.62700879	16.78124877	15.91885499	20.95332615	18.18989373	15.39746736	17.37586096	17.45138806
YALI1_B12443g	YALI0B09317g	111.8936842	112.7481058	101.6783798	100.2782718	106.1955853	108.834252	115.5742484	113.6976924	161.9920878	167.8614127	148.745781	148.4032649	147.0133197	169.1521771	162.4274761	162.682137
YALI1_B12451g	YALI0B09339g	121.7162383	108.76939	121.8625035	110.4298619	110.7337782	111.2639381	102.3295694	127.1615713	126.0822215	119.1013071	86.24090493	107.203795	103.1172598	100.6997485	109.4773436	96.1007772
YALI1_B12489g	YALI0B09361g	29.82086817	21.62322727	21.46114438	37.23645774	73.66714392	23.66068803	42.5305487	32.41625313	6133.570081	6447.783057	6914.712866	5126.891428	5971.450618	9622.25815	6298.195259	9602.190209
YALI1_B12529g	YALI0B09383g	29.65236521	23.04712103	31.41469807	25.13161407	24.74239834	27.4698268	27.93491328	26.90640534	28.81504257	30.56101886	30.75373719	33.61501899	35.72247709	27.45241428	28.55464431	29.62524065
YALI1_B12630r	YALI0B09405r	0	0	0	0	0	0	0	0	0	0	0	0	0	0	0	0
YALI1_B12633g	YALI0B09427g	6.757263244	6.461798135	6.809570461	6.534370115	6.853608497	6.135196466	10.01188152	6.477698601	2.287392828	3.114131373	3.20863969	2.265245106	2.234741713	2.229606017	3.07882907	3.208283009
YALI1_B12677g	YALI0B09449g	2.831327167	4.352233756	4.412533515	2.777738029	3.636296003	3.473241361	3.593773897	3.561374333	4.776518736	5.690045161	5.712853608	4.672015451	7.190331901	5.200282615	5.392224473	5.635555631
YALI1_B12691g	YALI0B09471g	136.9621378	128.6402748	127.0879064	137.5854178	143.0457633	143.874845	131.361499	149.2031419	154.8726853	145.2704766	123.4694522	142.0771437	130.5074691	137.3978821	138.200177	128.517224
YALI1_B12714g	YALI0B09493g	0.078615671	0.031879015	0	0.19917889	0.136351402	0.170010352	0.167549499	0.106833632	0.50840187	0.664468729	0.720667544	0.285718279	0.454125254	0.920778779	0.805276636	0.78555843
YALI1_B12742g	YALI0B09515g	109.2592459	140.2467791	134.2732196	117.7891297	122.6198757	125.4434573	121.4021303	120.7468701	123.6293099	130.0833581	148.5854946	139.9990834	118.2464982	128.0625564	136.6851131	126.8064961
YALI1_B12781g	YALI0B09537g	148.3229432	87.3122617	122.994375	178.6567422	188.327685	199.1869066	116.6731781	238.3904251	284.6082432	322.9211802	332.1901041	315.315919	344.7245098	313.8567236	321.9585874	319.3278076
YALI1_B12847g	YALI0B09559g	61.31726248	68.76280768	65.15611801	57.08165796	60.77226738	57.8787026	59.74737066	60.49983984	61.92262252	56.41064622	66.2212256	62.29989943	58.65776818	57.89347316	70.0909301	60.94953671
YALI1_B12874g	YALI0B09581g	100.3437319	184.629307	141.6082636	187.7095053	168.442273	157.7076238	136.6878123	191.6495194	189.5555189	159.0070208	201.0392196	200.6268123	236.4789682	207.934548	244.7802568	255.328116
YALI1_B12917g	YALI0B09603g	63.86713518	50.76267119	64.13288649	76.54720456	69.03878304	75.18688704	61.39596434	85.96759781	55.58730371	46.64929111	50.41820387	58.07091952	69.97905787	51.39964152	63.77272445	56.67697235
YALI1_B12966g	YALI0B09625g	25.51686498	14.4110893	17.92108947	26.13110878	35.97128903	29.96846497	28.01640812	33.64558498	76.70136714	75.09421346	45.14616812	33.00661492	67.74965817	60.8639451	58.1885465	62.76123254
YALI1_B12970g	NA	0	0	0	0	0	0	0	0	0.071093595	0.058073486	0	0	0.090719563	0	0.118534515	0.117696908
YALI1_B12993g	YALI0B09647g	306.1753565	141.1275643	207.3132505	270.4230582	250.5072711	263.5332545	268.2519142	249.7272495	308.8506757	346.929792	307.7886812	328.4241037	398.2204086	352.3797354	331.4538455	361.4800682
YALI1_B13041g	YALI0B09669g	12.12106592	12.94861367	14.35889516	11.15258488	13.8563434	13.85828989	17.51916851	12.37694522	8.744512164	8.47914682	9.63102179	8.765110529	10.09483568	8.331723088	11.72148596	9.017572966
YALI1_B13069g	YALI0B09713g	7.657020166	8.497853093	9.969536854	7.431074292	6.64953014	8.271579361	8.253908135	7.522194306	8.245157552	8.518524403	7.769810605	6.820053593	9.2320709	7.367181309	8.606503095	8.106706661
YALI1_B13112g	YALI0B09735g	14.28880884	10.85726289	12.17537366	13.3323236	15.30437083	14.37842112	13.52510684	14.84048477	14.90772555	13.43317751	11.6965657	13.22990932	13.73069922	13.56261162	12.77843357	13.62044048
YALI1_B13122g	YALI0B09757g	21.77283534	27.86997493	26.94277123	19.12963111	21.95865513	26.26172649	28.45139905	22.64736896	21.83343165	23.20350195	19.10641136	16.9550444	19.11871451	18.38168988	20.29091955	19.39450126
YALI1_B13137g	YALI0B09779g	120.3090966	192.578936	174.6749523	118.2441111	122.5979466	100.6443294	146.0239689	82.13019136	73.102271	65.76130992	80.20991629	79.13237344	46.81849444	71.50569876	87.32418938	65.41332579
YALI1_B13148r	YALI0B09801r	0	0.191274089	0.339215323	0	0	0	0.670197997	0	0	0	0	0	0	0.920778779	0	0.336667899
YALI1_B13150g	YALI0B09812g	67.74204444	61.69933295	60.96674883	66.3623704	69.38013854	68.40999888	68.86777213	64.91059583	56.88219432	61.83630679	53.28841909	59.06058279	50.15857952	52.6942738	59.58756239	53.70815678
YALI1_B13179g	YALI0B09845g	201.6890856	170.2581438	188.7434891	205.9491277	189.8181959	192.0684082	204.9983638	199.8535757	183.0679815	190.1503394	171.6429903	183.8711769	178.6394193	191.8267808	182.618061	203.0650358
YALI1_B13259g	YALI0B09867g	3.076700205	2.065705727	2.355802755	2.510603493	2.903397203	3.807360969	2.737297476	3.088711931	3.005051139	4.634970771	3.333683459	3.837427223	5.013587115	3.131608699	3.290945733	4.017019324
YALI1_B13290g	YALI0B09889g	31.75884042	28.44885842	31.4135596	23.70880743	26.95385777	26.25314166	30.89760506	29.68048099	28.03851596	27.28383171	25.734908	26.18034496	26.29740148	25.51403982	27.87390203	27.28044496
YALI1_B13307r	YALI0B09911r	0	0	0	0	1.636216828	0	0	0	0	0	0	0	0	0	0	0
YALI1_B13328g	YALI0B09955g	4.631863795	4.0276527	4.950487871	5.481403045	5.244818668	5.662272054	4.87294871	4.034232171	67.88921262	72.20962897	100.3132532	86.95428904	95.49652522	71.82818539	58.67684808	59.64408492
YALI1_B13355g	YALI0B09977g	43.80721081	46.43695175	48.70133893	48.45056255	46.96957878	50.43702978	50.36283735	51.09624195	45.9539191	41.93210109	39.85361097	44.2856765	49.55915875	39.53280782	49.30970444	44.54836072
YALI1_B13388r	YALI0B09984r	0	0	0	0	0	0	0	0	0	0	0	0	0	0	0	0
YALI1_B13401g	NA	2.256891889	2.603529329	2.938239204	0.903708536	1.349780788	1.472607654	3.040802423	1.024526841	0.754921913	0.822220298	0	0.766026466	0.642216186	0.949484113	1.206237929	0.624894373
YALI1_B13411g	NA	2.566868273	4.739707091	4.532453333	2.129076041	4.074364784	1.734681898	3.744778639	3.815228165	3.705301765	2.179232187	2.205975565	3.192942129	1.323890571	3.206252283	3.150707693	3.394259125
YALI1_B13439g	YALI0B09991g	206.5523366	181.0326312	255.4617592	200.6108625	193.1401927	219.4298038	267.6126303	182.7537701	95.05981188	83.08681634	129.0994909	118.2924247	173.4505859	73.24600528	118.7217056	98.18546844
YALI1_B13483g	YALI0B09999g	72.91633085	61.12565472	75.00296609	50.4778964	45.74925486	56.19507394	53.90593513	59.09417173	26.10680443	24.22421866	14.22785731	18.54159803	16.13940468	21.49907244	17.36891409	22.47738016
YALI1_B13536g	YALI0B10021g	51.92407821	47.98034356	52.35563374	44.22311896	47.46525046	45.41533175	54.03258826	46.117337	29.31346202	26.62520317	26.76546501	25.22411997	26.36567404	27.54024882	35.54619343	29.3206953
YALI1_B13556g	YALI0B10043g	54.88681378	41.36574227	47.7074814	52.50656697	51.61954841	56.75853054	55.19422131	60.42512649	45.49550315	45.06742029	40.39535576	44.69641924	50.83319509	36.76646109	44.35716356	44.9557697
YALI1_B13586g	YALI0B10065g	64.61022777	93.72668717	85.65451103	55.21247096	69.66324823	59.3261981	86.59020758	43.92775944	27.37767827	28.88368975	38.73105356	34.24228253	22.94272311	28.8762472	37.91415101	29.72011914
YALI1_B13614g	YALI0B10087g	0.824653709	0.577825014	0.915729259	0.691320451	1.340890696	0.7539921	0.581539518	1.545015524	1.568522361	1.665641343	0.722606559	0.661123911	0.87566753	0.848290963	0.964355357	0.843934329
YALI1_B13641g	YALI0B10109g	9.092463862	5.373891077	9.433416613	13.20271498	12.6222441	16.17527064	8.872144914	14.54463584	7.495296141	6.40737703	3.829833231	3.700732001	6.339217831	4.340814244	5.013301159	3.270488158
YALI1_B13662g	YALI0B10131g	11.73132475	15.79859927	15.05248636	13.34892675	15.36723887	15.02146262	15.17687337	15.81625572	14.77383334	14.15561121	11.99927914	12.304586	11.31136249	12.71571668	12.44937164	12.18512323
YALI1_B13699g	YALI0B10153g	147.4401715	238.1924088	239.7008547	196.6072689	208.1962548	201.6986626	251.2242511	127.3589159	207.0783762	220.4137698	358.5245531	291.4485183	265.466177	204.6920457	217.9498369	191.2765306
YALI1_B13723g	YALI0B10175g	1.088059219	0.799298915	1.077313583	0.865624873	1.025616962	0.93778305	1.064240551	1.218775511	0.815814546	1.4994134	1.011876061	0.644740374	1.203687262	1.128677324	0.828877654	1.041085766
YALI1_B13737g	YALI0B10197g	13.01985166	21.1060658	21.25355058	10.93938129	12.85674853	11.95164057	14.49300305	11.94871165	14.20646899	14.19816335	14.90000473	15.69233168	15.01534378	12.09688205	13.06195652	13.932296
YALI1_B13800g	YALI0B10219g	31.06300604	28.45351785	32.19453278	24.76347485	27.79308639	26.23278518	29.84016469	22.4489333	20.31528931	16.73286446	19.36366002	16.72057047	22.28618788	13.24036361	20.82245407	16.70288187
YALI1_B13828g	YALI0B10241g	34.27523712	31.40008393	40.50316923	31.91307846	29.54699006	31.33658648	33.19325416	32.41549485	40.20685783	41.53196704	43.98221375	42.93474105	51.26550564	36.96614187	40.46731965	39.8850558
YALI1_B13886g	YALI0B10263g	11.89926792	16.24314567	13.77400449	12.36002647	13.68518922	12.45355831	15.18905202	11.70620091	9.176593942	9.949832921	7.728947443	9.17346156	8.349188198	7.525350434	10.44595876	9.015306193
YALI1_B13888g	YALI0B10274g	57.20171495	65.39950918	54.985776	59.86633376	60.97634711	65.92692344	69.92128316	63.06097907	77.26968931	67.18785621	58.14607802	74.11243566	49.84132787	62.2031019	68.96661385	62.52773049
YALI1_B13915g	YALI0B10296g	13.66468658	23.12590449	21.36206238	13.00919656	14.07146472	15.41626671	15.46209331	14.00204309	21.60244285	24.22918773	26.83373889	27.8742182	25.36997979	22.46094553	23.70083412	24.26684258
YALI1_B13917g	YALI0B10318g	43.6401381	55.09163564	56.09312197	44.65660595	49.18840956	49.55712284	56.72696942	47.26825915	38.10766354	42.78304314	38.36075404	34.22804736	34.1215375	37.78746877	37.02487977	40.15384869
YALI1_B13948g	YALI0B10340g	214.507214	160.1912375	174.1834676	213.5172325	211.0719708	214.7035831	194.6473403	234.0228125	270.1608679	277.054363	229.3558884	263.7813638	256.8944	265.6378354	249.2022088	253.0890206
YALI1_B13973g	YALI0B10362g	153.11081	138.8660221	149.7711706	159.5781235	169.2414821	163.0809836	187.156864	153.3838326	105.5293964	110.7691987	121.7851059	127.4121383	110.8074031	111.393671	127.7677202	106.7491877
YALI1_B14013g	YALI0B10384g	11.69485666	18.93442893	14.32608038	10.23561884	9.431960046	10.5133492	10.71457567	12.08381272	33.57424737	28.26158844	26.61504777	23.2568946	24.29494168	25.85126627	28.76939728	27.98509683
YALI1_B14044g	YALI0B10406g	429.5832119	292.1576663	314.200067	334.8539624	354.4224831	354.1036366	316.7545012	359.6173978	363.4390618	327.6740409	343.7156351	292.1231995	361.8636044	353.184558	332.8551673	386.4352405
YALI1_B14064g	YALI0B10428g	32.64078873	27.00884815	31.2030875	31.71519453	31.34247362	34.62425834	32.76350766	34.81090847	28.41797379	30.75981457	28.02164977	31.26740572	36.31476741	26.58619157	30.21378794	29.74090715
YALI1_B14121g	YALI0B10450g	539.0917741	430.0429033	423.6888189	592.0847988	547.4487386	588.4334219	556.2526413	567.1836654	379.447732	393.2785152	430.142686	427.3687262	424.8411381	435.2059024	474.910398	430.3350186
YALI1_B14147g	YALI0B10472g	56.20662918	65.25747884	63.0605933	49.33888471	56.18947898	56.3204705	52.87341952	59.27949425	70.67482434	52.40837809	61.16236337	48.80694446	60.6227887	57.87760333	54.38444757	62.94398376
YALI1_B14150g	YALI0B10494g	90.79527225	109.0119633	106.251886	106.8689922	115.2531682	103.8287698	120.7824894	86.65664343	64.26910689	74.177711	80.65731306	86.08711742	54.77812154	71.31903837	89.56857577	69.79364895
YALI1_B14187g	YALI0B10516g	121.9830502	90.70153432	115.5895619	124.8103948	119.6770677	116.3160993	112.4581463	129.5140746	127.7445061	123.6448095	107.8567892	116.2334473	110.4050348	125.5548584	115.7182761	113.5397393
YALI1_B14194g	YALI0B10538g	43.538638	37.98149376	42.51810642	39.28338849	43.41127736	42.22916448	38.80893202	46.84455813	41.82892164	41.02567409	40.00748592	40.87387183	46.45016804	40.86169269	41.45675192	44.78797539
YALI1_B14236g	YALI0B10560g	80.20035646	107.8750326	102.4066964	78.47691791	87.63908149	80.15124114	104.5970323	60.31494078	43.69389029	44.96601497	52.10166427	53.64165535	40.26208563	43.98555195	52.70219444	44.87783089
YALI1_B14238g	YALI0B10582g	35.83851943	52.39121708	46.40723023	40.1774588	44.06866237	39.64282039	52.85346684	30.84973111	23.28315231	24.50701129	27.58750511	29.29967397	20.66138046	24.16919528	28.8483377	22.12701864
YALI1_B14268g	YALI0B10604g	0.464224751	0.744225465	0.427009575	0.501459028	0.374490079	0.875502412	0.172565951	0.485975741	0.209449393	0.285151251	0.148448883	0.163484844	0.044544935	0.10537189	0.116405153	0.211901419
YALI1_B14292g	YALI0B10626g	0.268341489	0.391049249	0.120609893	0.389505384	0.254522618	0.385356798	0.148932888	0.2706452	0.759213459	0.487277068	0.153742409	0.253971804	0.380600213	0.347849761	0.226042564	0.209482248
YALI1_B14308g	NA	10.92153087	9.665880788	9.880008704	10.7607672	13.64300666	13.58993007	11.54587896	12.13246549	15.80738737	16.07183738	14.46139537	13.04719092	15.34294608	13.21192941	14.36946061	13.47139189
YALI1_B14324r	YALI0B10648r	0	0	0	0	0	0	0	0	0	0	0	0	0	0	0	0
YALI1_B14325g	YALI0B10692g	58.59750809	59.40389536	57.28189722	37.27180946	40.97339763	37.36212924	45.72033421	41.81337523	41.70851866	36.29829939	31.69340377	25.9328906	31.23080464	30.2049443	32.61314769	34.31362411
YALI1_B14355g	YALI0B10714g	30.37625017	31.39416013	38.13144843	29.32708443	30.42965499	30.61687389	36.93121132	28.55943897	20.94654737	22.29286209	29.62068095	29.0207877	25.97940128	23.06031443	27.80225922	24.34089521
YALI1_B14382g	YALI0B10736g	285.6067002	399.4117685	407.4178984	558.9010717	549.0276619	491.0182319	445.0551475	401.16645	356.2267616	420.06563	485.8075347	506.845302	322.0230455	455.5648104	447.1355573	394.830875
YALI1_B14418g	YALI0B10758g	191.4563885	217.3557493	198.0111488	141.3939731	164.0931059	162.0751055	141.3652652	191.0576269	247.8807139	239.0326687	193.4007973	191.6649895	226.443756	214.7318724	222.3066227	221.5805795
YALI1_B14441g	YALI0B10780g	153.1593884	191.844184	181.6176237	171.1532964	174.1253557	164.9236424	176.635322	164.3890179	214.9266559	232.3575587	309.2768046	256.7057128	247.5815031	263.6587861	241.687318	245.9260589
YALI1_B14492g	YALI0B10802g	62.62828851	58.09906357	64.26409721	66.27198634	67.9008426	67.42657602	67.75578131	72.22597452	57.21952525	63.45446555	66.59509315	61.67223416	69.23345917	60.01621523	60.01899144	59.06558834
YALI1_B14510g	NA	8.012975033	8.123245269	5.162215086	5.921268721	6.080262532	6.137163821	7.234277146	8.563836664	6.045588657	5.467511208	3.978796611	5.662630593	1.928630708	4.616524605	2.879949709	3.514923699
YALI1_B14517g	YALI0B10824g	7.981572833	11.73699168	11.24850236	6.790026294	10.01482624	7.903183935	8.411890537	10.70241997	9.358991398	6.949983733	7.638296861	8.146317216	8.685539992	7.990037116	8.353800067	7.929590579
YALI1_B14544g	YALI0B10846g	1.424970277	1.460113066	1.308493481	1.229304271	0.979953279	0.704122195	1.251795692	0.819864895	0.693615696	0.72846855	0.526720188	0.638077178	0.189662996	0.348951102	0.351070357	0.389600104
YALI1_B14569r	YALI0B10868r	0	0	0	0	0	0	0	0.372474013	0	0	0	0	0	0	0	0
YALI1_B14573g	YALI0B10890g	32.10531997	19.80717971	25.00673029	23.16343931	24.90012275	26.06489576	26.31616555	30.96025454	31.22114714	23.66903239	16.63443045	21.87191066	28.59883822	19.11784307	23.91258243	24.61042339
YALI1_B14600g	YALI0B10912g	45.65392525	42.50488087	45.19939488	40.72986985	44.77679051	43.32115638	42.3027321	45.78533337	58.2319736	56.19190551	53.43829909	54.30058265	51.3704565	56.88101434	57.80599056	51.43703596
YALI1_B14615g	YALI0B10934g	107.593576	110.041149	106.7986011	101.9904429	107.9568825	104.6415545	95.50393523	118.9559174	134.6842927	122.6759315	143.2011354	137.9013644	135.2698918	125.3651859	120.2280295	133.8603632
YALI1_B14645g	YALI0B10956g	6.219492773	5.518414478	6.059388068	6.67569161	7.005600743	6.919093687	7.466895458	8.026934614	7.265247794	8.198434296	7.14000983	7.418886204	8.195648052	6.132610126	8.366963099	9.093157234
YALI1_B14658g	YALI0B10978g	19.45372272	19.31527208	21.76934114	26.26975568	22.19778385	24.36815047	21.94002085	24.19803737	25.5498092	26.22053762	21.73035072	24.67289044	21.76597513	23.69815964	23.81958405	24.32644933
YALI1_B14680g	YALI0B11000g	68.31531185	91.34898988	93.33494702	80.97527225	90.81803109	77.17771995	90.11771837	64.8392421	48.15892623	60.45398851	63.28602265	66.60559517	39.07113329	57.47441733	70.52577724	53.44923762
YALI1_B14686g	YALI0B11022g	118.5941392	133.9052852	124.1623302	125.8558989	115.9044331	147.1323274	130.1383416	135.4942835	151.3260842	144.3645744	131.0006703	147.6030657	96.66790143	148.6029256	120.4747383	141.3638974
YALI1_B14733g	YALI0B11044g	50.28478513	33.49814735	40.0679493	42.82346129	44.44139067	48.27555859	49.22826437	46.50143292	36.53344508	33.49424933	30.52864798	33.15812655	40.58633152	29.37472014	35.34669368	34.89078672
YALI1_B14752g	YALI0B11066g	16.65782429	16.07041488	17.09488854	14.10744523	16.357454	18.00391542	21.6522079	14.9605442	13.3028217	11.49345345	11.48889731	10.30358881	10.69851463	9.991973499	13.73636917	12.21794069
YALI1_B14793g	YALI0B11088g	89.07265925	80.34983084	78.47634948	64.83195143	67.65127268	67.6521796	77.73288107	75.06098797	73.87504257	63.59454643	64.63062223	57.64915747	69.09690402	53.84331754	61.85420415	67.10613185
YALI1_B14801r	YALI0B11110r	1.333666392	0	0.799247063	1.877192824	0.963798953	0.600858505	0.789548325	0.377576397	0	0	0	0	0	0	0	0
YALI1_B14804g	YALI0B11132g	131.9526257	133.5904608	128.5611391	118.0518621	114.901733	125.4168575	136.6696188	126.0622978	114.4736138	104.1770469	88.37817507	91.05383924	80.06590516	84.10045251	82.08207313	90.1818163
YALI1_B14826g	YALI0B11154g	36.93344475	41.26158249	39.54768105	37.14950198	45.97267239	41.50742282	39.7108671	44.32388803	53.05247966	54.75333535	46.78127421	52.4677587	50.82022612	49.68973477	55.04006397	48.52830636
YALI1_B14844g	YALI0B11176g	23.89512081	18.99533871	23.68530613	22.34976837	21.52599067	19.42489709	25.83373922	22.64109892	24.23479086	23.57202816	19.74423164	25.74185642	18.09272083	19.13685229	19.89093837	21.129117
YALI1_B14882g	YALI0B11220g	23.91195895	21.51658892	23.20714119	19.59558698	20.79156172	21.26778954	23.71476559	23.21725535	15.47737599	16.074632	16.6436985	15.82360594	19.28727722	14.14446532	16.15408411	16.41374551
YALI1_B14924g	YALI0B11242g	107.7978077	105.9078836	84.74215534	112.5783228	122.1212741	130.1351968	101.463915	155.9771021	197.8145458	175.6613694	164.3121999	165.6646533	211.1623454	164.4659712	178.2705233	202.3782153
YALI1_B14948g	YALI0B11264g	0.140123268	0.45456502	0.453458826	0.236675434	0	0.075755908	0.597274899	0.404639299	0	0.370105639	0.578027646	0.212191468	0	0.227941782	0.33994225	0.05000594
YALI1_B14959g	NA	83.75848331	153.5293356	169.1079922	179.4506949	180.2487623	170.7162998	146.2882657	139.4341686	133.7493956	164.7660958	133.8712029	125.1210233	88.41787802	158.9186223	160.09949	168.5273998
YALI1_B14978g	YALI0B11286g	25.67276848	26.34680699	26.62635563	22.52108493	26.94744288	26.30945716	23.06551436	27.44791089	41.79828099	47.51414134	35.56363844	37.27973585	32.23223112	37.90240075	40.67302234	38.71211938
YALI1_B14993g	YALI0B11308g	170.7514898	142.7152653	161.1241377	142.1104493	156.349608	155.956163	175.5794642	168.1858121	131.1676825	138.8924218	111.2150168	108.9803593	97.94688811	131.6116853	120.1816513	136.1213777
YALI1_B15015g	YALI0B11330g	62.14062138	89.04701463	86.78283818	67.88311641	77.23670634	75.89866598	103.1916267	58.76039663	30.78068282	36.88982724	51.39993098	52.67459872	43.59256438	35.72212427	54.02605657	38.76543815
YALI1_B15036g	NA	4.96722687	4.923681316	7.144290077	3.146213482	5.504144362	6.56448135	6.175395831	3.984458402	1.606134887	1.457763028	1.138360569	0.668619647	1.138623086	0.987592659	0.595091649	1.132532489
YALI1_B15072g	YALI0B11352g	22.90939827	21.52842623	22.01930451	18.42333083	19.91981179	20.48502433	23.09973205	20.8251605	15.16134843	14.50447994	12.62956908	12.94879354	15.99519689	11.63513656	15.57620282	14.63294323
YALI1_B15092g	YALI0B11374g	270.2412252	261.9718906	261.4476407	262.6505626	257.8169502	275.3379474	264.3880326	282.4171331	264.0047718	277.6044639	235.8522118	214.0350264	245.0306529	242.5800994	225.2902022	243.4501686
YALI1_B15109g	YALI0B11396g	24.09151025	79.1178704	59.05408988	30.00021371	33.19986207	32.95792351	29.75911815	28.03203207	50.49955775	53.0073007	60.91862801	68.23785859	49.91106854	51.56318533	52.28964939	51.08070312
YALI1_B15151g	YALI0B11418g	99.81068938	74.47490915	94.63897353	94.78117925	85.06232389	103.1977584	93.09772698	94.00591753	63.47627294	56.47160815	57.43086277	68.93493419	89.06064274	48.28846375	61.48063643	53.06336642
YALI1_B15180g	YALI0B11440g	92.02366396	92.25404941	85.50101995	85.46273565	93.70168902	98.57309898	100.2229115	93.73986537	75.11415057	63.79359108	59.06418492	59.37234626	69.83065195	56.29857387	52.67520919	58.30715653
YALI1_B15192g	YALI0B11462g	27.03233959	26.75038554	30.45580665	19.22069258	19.29819791	21.34835708	24.94079335	22.00961296	13.36669961	11.92690888	10.54097072	8.953581483	12.89882373	9.112121524	11.19975502	12.00093155
YALI1_B15237g	YALI0B11484g	50.09027216	49.0210343	51.37152539	50.6147152	54.37976405	51.84299741	50.38455978	54.3574625	42.78191609	43.85427429	45.75463681	45.30930342	45.18972746	42.22253713	44.05871269	46.04481214
YALI1_B15275g	YALI0B11506g	75.67693198	70.10518466	74.93526254	75.63549176	72.79368361	79.32820875	85.06005053	80.98205828	53.64876382	51.37678947	55.8215445	50.55476071	69.36368744	49.11286765	65.31331892	60.04252077
YALI1_B15301g	NA	46.67832374	53.93055917	46.22312183	46.92982059	58.47046983	46.46639103	52.24178086	56.76231828	70.19567299	61.64540366	43.6388878	63.50512773	67.25674994	53.69527756	54.62411462	62.1375181
YALI1_B15307g	YALI0B11528g	50.67152369	51.80172131	53.22705005	36.06186214	43.81903487	44.37568453	52.15982482	49.60547912	61.67182263	53.00886716	45.55883204	43.46760843	51.97514749	39.97938893	40.41403111	48.55203927
YALI1_B15310g	YALI0B11550g	32.77792783	25.72881723	30.22740833	27.89578267	29.07270077	30.82787319	31.49005264	33.83770903	30.70065415	31.27721147	27.26028037	28.06933196	35.51134086	25.9444505	28.77127273	30.69521423
YALI1_B15346g	YALI0B11572g	82.56784456	85.53182884	85.77827054	92.7802977	97.46427798	94.73861425	100.3571554	104.5753597	83.93783763	79.05737292	74.3392984	75.04711947	78.29098281	75.03806392	80.86029529	81.32856319
YALI1_B15380g	YALI0B11594g	63.4975029	50.59958683	55.09287602	63.09228449	65.61748913	69.63947851	61.93480538	76.60480115	76.98656889	80.82787468	83.22680603	92.81762394	99.63569858	79.74723721	87.7933174	87.832914
YALI1_B15420g	YALI0B11616g	5.358209006	5.175721927	5.407367009	8.27119813	7.506973	5.944006796	8.887952878	7.277167511	19.94075671	15.95501198	15.81292765	11.86487435	18.04132317	11.24487937	10.62822562	16.68656158
YALI1_B15440g	YALI0B11616g	38.01181161	31.07777047	30.64382741	42.32199235	43.58075377	43.60839449	50.23609926	44.25271977	23.63299461	26.01308404	28.11079687	33.91616766	35.55197119	22.40953138	33.27985363	30.95919928
YALI1_B15460g	NA	0.067609477	0.205619646	0.121552158	0.214117306	0.58631103	0.182761128	0	0.057423077	0.109306402	0.357151942	0	0.102382383	0	0.137477387	0	0.452397489
YALI1_B15475g	YALI0B11660g	54.05736495	60.03940497	56.93258598	44.27483372	43.43287294	42.80081847	58.33468265	51.07125058	62.82370192	57.78279461	46.88123544	52.98717322	46.50416567	49.17850309	51.47708991	53.91701915
YALI1_B15482g	YALI0B11682g	101.9029223	95.45128394	104.400097	98.80097321	103.5859487	115.151668	106.4559737	112.7987857	101.8706583	109.3787721	98.47674303	103.7898575	103.0244346	92.4628401	102.0582178	95.86948115
YALI1_B15509g	YALI0B11704g	105.706357	86.22173861	91.82058452	95.41524754	93.36032776	102.1934004	114.470752	106.6188476	80.19357497	72.27660203	73.55228369	83.58968675	74.29932204	81.62420477	87.55467316	81.64802623
YALI1_B15521g	YALI0B11726g	37.07742904	34.05140802	37.32297166	33.85880756	35.64601117	38.44164026	41.62674227	39.61360092	28.45134755	24.37950212	21.81185617	22.5439084	27.28982504	21.88480609	26.55344935	26.51734073
YALI1_B15560g	YALI0B11748g	93.22932921	74.52663083	93.94741451	90.61094829	93.47472991	92.85757255	102.8448461	106.8584867	94.79765024	93.53007587	96.33060102	94.2085083	101.5196343	84.82523126	96.91067504	97.37809783
YALI1_B15587g	YALI0B11770g	76.03551742	140.2291998	108.1111008	80.38541741	96.25676537	80.7471895	111.0663937	57.55595682	40.79567865	40.99868159	46.89282455	54.62650147	26.78963688	38.51184723	49.89947987	37.83688088
YALI1_B15592g	YALI0B11792g	1.735179637	1.869989843	1.883004522	1.749243505	1.694540549	2.831212858	3.192802597	2.496078259	3.639334542	1.56899119	2.04203023	3.053717334	3.321751858	2.288640896	2.085830628	2.189638713
YALI1_B15624g	YALI0B11814g	28.08788645	28.3269259	23.57188676	22.4958689	27.34881197	26.92834855	19.88112666	32.77476634	33.1239907	34.87882571	29.6746264	30.09264487	34.60549404	33.37046045	33.76179967	36.30633011
YALI1_B15626r	NA	0.579509801	0.195828234	0	0	0	1.566523959	0	0.820329671	1.249216023	0	0	0	0	0.314234028	0	0
YALI1_B15655g	YALI0B11836g	59.60985677	51.17644519	54.22726871	51.88159261	57.8927854	59.44023665	58.0639687	61.44411021	46.46466711	44.55139778	43.35357999	48.18291924	45.74987558	41.2065555	43.05524815	44.17484615
YALI1_B15670g	YALI0B11858g	0.077267974	0.031332517	0.083350051	0.065254798	0.067006975	0.167095889	0.054892407	0.328131868	0.799498255	1.673511956	0.212493973	0	0.127525786	0.11312425	0	0.13787352
YALI1_B15692g	YALI0B11880g	75.38338881	107.5622398	106.4915488	76.67438783	84.82102426	89.71215255	119.2905731	58.31143398	43.75302951	47.38796496	56.70824925	56.7062846	39.46300987	43.24166791	58.62378464	45.90179399
YALI1_B15703g	NA	0.618143788	0.731092074	1.296556347	2.936465917	0.446713166	1.531712315	0.457436728	0.962520147	0.832810682	0.952405178	0.708313243	3.82227565	0.212542976	2.052995648	2.777094362	1.976187126
YALI1_B15706g	YALI0B11902g	3.207761571	1.815998926	3.60755569	2.550717078	2.81489506	4.936192739	2.848556571	2.913170734	1.930752365	1.522136646	0.52509743	0.925252862	0.988365765	1.152056975	1.094884603	1.238914817
YALI1_B15733g	YALI0B11913g	350.8836623	321.1141737	362.2596696	489.9164811	352.4472501	415.7686968	340.2749408	563.55493	485.2588441	526.3715379	322.1079412	769.8001634	325.0111395	812.3170909	776.1147569	673.2694121
YALI1_B15742g	YALI0B11924g	27.05050135	18.54488518	21.86129126	23.5900953	25.51835103	26.84729232	23.25265532	29.97969081	22.00232093	23.09523475	22.2380479	23.17957486	32.76945939	19.59479185	23.72374205	26.88790236
YALI1_B15792g	YALI0B11946g	242.5891342	166.6229746	194.4671909	228.1626379	208.111002	242.3693735	206.7254488	269.2009212	275.9346899	268.7598224	267.3941715	285.2188299	324.5110067	256.4454442	281.354953	294.545565
YALI1_B15852g	YALI0B11968g	28.99310958	34.85699002	32.64466398	28.32667962	31.82644968	30.90065799	34.88781899	26.84257382	17.81974003	19.30765781	19.56528209	21.54699328	20.34348357	17.16158208	21.60202544	18.89971445
YALI1_B15858r	YALI0B11990r	0	0	0	0	0	0	0	0	0	0	0	0	0	0	0	0
YALI1_B15887g	YALI0B12034g	14.58888364	11.15686416	13.9468282	10.76785131	11.0569822	11.93616105	13.39619917	12.88100784	11.19644734	8.366040523	8.76603548	9.18646895	9.054172557	8.525644812	9.677622567	9.375741505
YALI1_B15905g	YALI0B12056g	95.49020173	110.2525326	109.2587562	102.3435647	101.6601609	103.9160539	121.5028992	100.706779	87.37148365	90.04740327	89.58671335	92.78645988	80.31775334	74.87105331	97.40804638	82.61381342
YALI1_B15928g	YALI0B12078g	109.3697353	115.2983781	113.14045	95.28001203	101.6152552	97.23340529	105.6384174	95.8789241	64.05489279	65.64584158	63.0800743	81.52903912	66.91680889	63.08778256	81.10542418	66.86231352
YALI1_B15943g	YALI0B12100g	89.63835104	77.53124977	84.74191582	81.22321745	79.2601435	85.31218503	82.79960071	94.85623309	86.29050645	84.63460773	74.68578615	76.02140475	86.29967059	64.52841522	74.13022006	72.28989776
YALI1_B15964g	YALI0B12122g	108.1751629	98.33787653	100.0314477	92.47995574	90.15733542	112.1733877	94.01449609	122.6029761	160.4116248	166.8660712	109.5272896	127.0884275	100.0607035	139.2983991	121.3584545	131.0420005
YALI1_B15988g	YALI0B12144g	25.65829604	25.38113987	25.70758275	25.37061549	31.75129354	31.16242296	28.85006124	30.23339146	29.83759651	31.24639649	26.80599255	27.85338801	29.27962721	26.67016162	26.22678339	26.88533648
YALI1_B15996g	YALI0B12166g	566.3641456	566.5963575	542.8376354	647.2593574	592.595671	670.8408481	609.1442737	695.7425043	633.9485551	686.2919667	455.3111597	650.2151267	492.9434227	658.2812656	659.9002412	597.0464114
YALI1_B16022g	YALI0B12188g	50.53147841	49.16804283	52.95762046	48.43481139	49.47476675	59.46949088	47.54502711	59.95937288	79.36398626	90.28144258	75.94963376	84.98757731	111.9612879	68.40284843	90.96420464	93.20936705
YALI1_B16068g	YALI0B12210g	136.0016164	137.051427	133.1231691	136.8580282	133.2910708	142.0530942	140.2451364	149.3178057	114.876227	122.2622461	105.2174614	109.9274625	98.4658884	123.4298269	126.6591836	116.5993156
YALI1_B16087g	YALI0B12254g	0.507071076	0.538527644	0.217057424	0.050980311	0.523491991	0	0.771924479	0.635755495	0.624608012	0.76532559	0.885391553	0.36565137	0.39851808	0.432071788	0.878690013	0.301598326
YALI1_B16110g	YALI0B12276g	29.66661435	42.85354839	39.00226045	29.43747061	33.65099976	34.16244206	40.42935059	24.65382576	12.5946291	13.75185764	14.72804526	17.46799074	13.00255371	11.53682373	18.68634438	12.84103077
YALI1_B16158g	YALI0B12298g	19.82380482	16.55906703	16.92394403	16.83994791	19.03934742	20.23567149	18.3417372	19.92077988	18.91286195	18.74087609	15.53719371	18.75909478	21.51140604	14.73858956	17.16647442	18.73152613
YALI1_B16194g	YALI0B12320g	45.18214569	51.62980795	49.66545188	52.86021003	61.51685259	56.398942	67.37453342	39.0566647	27.53155002	30.58113502	34.47493361	37.38556722	27.61294415	33.63899816	40.27939428	33.1663909
YALI1_B16239g	YALI0B12342g	168.9193499	195.0591072	187.5616788	154.8208622	152.6624656	172.4113802	173.7733695	152.0743938	125.6455575	121.2741759	109.1485609	111.682251	153.4338539	100.6568294	117.32103	119.9477915
YALI1_B16255g	NA	0.358195904	0.653625364	0.515187953	0.226879265	0.31062836	0.968270879	0.254468114	0.517187978	0.810749472	0.189219572	0	0.21696929	0.295589569	0.699222737	0.868991448	1.214382663
YALI1_B16277g	YALI0B12364g	340.5779879	336.742771	342.9235327	382.0288434	381.4553689	427.1766136	416.2674227	373.7435159	222.300249	238.2160422	256.4221947	285.9470071	298.2323656	275.4406381	273.3263114	275.2708511
YALI1_B16309g	YALI0B12386g	91.78886607	67.20964046	67.03349754	63.6861732	63.21057376	67.30800377	69.3463253	110.2930816	80.30463242	65.00588006	41.18380475	57.35836727	51.76490469	79.13491255	81.39638926	86.34635147
YALI1_B16318g	YALI0B12408g	44.22663594	35.99391355	46.17920396	47.11204082	47.07130255	47.16673666	47.80014056	48.26547535	34.09977888	39.13075205	39.60870642	39.45074899	40.54094844	36.99522491	40.32509276	36.28662478
YALI1_B16375g	YALI0B12430g	36.74123722	32.88420276	45.38830428	30.61819139	27.15882155	29.91904251	43.89522958	21.95533014	12.05646636	10.27663353	10.09877123	11.67214966	11.55376668	8.966372584	10.32897494	11.09750352
YALI1_B16410g	YALI0B12452g	35.25282792	29.54506401	32.36218436	28.4274892	30.60460411	32.30076115	33.63863174	35.57787237	31.97018454	30.24393039	25.45029763	26.61941971	31.14093763	26.30985684	27.72478181	31.42611776
YALI1_B16419g	YALI0B12474g	156.4611714	182.2931117	199.3908092	159.215024	184.2567028	155.7928011	201.3181596	133.4268501	102.1658647	108.1698172	126.1707695	123.6367375	92.67586188	112.8901837	127.6067102	102.262613
YALI1_B16446g	YALI0B12496g	85.21411223	74.48884891	87.39208025	83.52263331	86.84968546	90.99539026	77.77899982	90.99767088	69.50476766	74.22615841	69.86786594	73.57440272	72.90224077	69.44234127	70.82934379	68.79295663
YALI1_B16477g	YALI0B12518g	159.9904259	176.143441	185.3634441	165.9556938	153.8979721	176.4888531	181.3520089	170.8557398	171.7339401	183.0984866	193.4135229	207.5030414	167.3115669	183.7153438	189.1916075	181.558623
YALI1_B16504g	YALI0B12540g	42.65827762	41.4410803	51.77059502	51.81381948	43.61912906	49.76364712	51.04358884	44.63943053	43.74504029	43.44583519	54.04302582	58.78696446	46.58461217	46.54864168	52.99681233	45.67547705
YALI1_B16544g	YALI0B12562g	818.4984904	809.9027086	827.2561664	690.9703963	704.0691209	645.5013947	803.8358112	612.3871188	427.8720256	465.8256372	488.8506658	460.527167	428.8252809	448.4416613	483.0538035	435.5019806
YALI1_B16566g	NA	1.976277015	1.581689584	2.524544811	1.098037469	3.382563634	1.687025801	2.309175791	2.341094677	2.522455432	3.434153287	3.69480706	3.701516941	3.540679865	3.172555088	3.084176912	3.340781456
YALI1_B16572g	NA	38.46228016	21.23648406	39.59127418	35.43698066	42.71694647	48.04006806	39.94947426	37.88100125	22.48588842	27.55172123	32.66111064	36.40262524	43.12851221	24.68482862	38.59004041	39.02586591
YALI1_B16578g	NA	90.75169302	64.80134294	92.39885748	78.58302619	90.24091504	106.4493276	114.4007672	89.09882647	52.53619956	56.0714432	89.61002418	66.6578111	100.2060323	51.43501801	81.05301149	79.78408203
YALI1_B16584g	YALI0B12584g	106.7779004	108.3648172	115.8797235	102.8442808	105.954779	105.7229614	116.9780073	109.9679268	106.2874633	98.19977677	104.4319337	101.9338511	113.7104922	93.6312658	119.3716655	109.9828562
YALI1_B16645g	YALI0B12606g	21.06234055	18.1267829	17.42724267	19.61482462	18.76195296	22.44736684	18.87330124	20.79841329	14.05980387	12.24120773	24.03751265	17.73021982	23.93608986	15.73388261	16.48082985	17.24905876
YALI1_B16687g	YALI0B12628g	40.13610964	44.02388374	42.53009065	37.74236227	42.75625561	39.16498407	51.23869344	35.03429606	25.0970656	23.26000372	25.59644607	26.03543355	21.97460344	21.71844932	27.54098116	23.79687007
YALI1_B16697r	YALI0B12650r	0.154535947	0.313325175	2.222668024	0	0	0.835479445	0	0.525010989	1.998745638	0	0	0.468033753	0.637628928	0.502774444	0.416564154	0.275747041
YALI1_B16705g	YALI0B12694g	30.49438791	16.36909431	28.92513182	31.95697307	31.52999433	38.79829201	33.03883766	34.82243266	12.18413437	15.55812569	23.9419579	26.23072729	29.93798837	16.41334723	23.3746701	20.47327344
YALI1_B16735g	YALI0B12694g	52.37630917	42.71698585	54.56104559	46.70922438	46.54518238	52.05088196	49.65573907	49.63850068	42.70326186	40.11620759	35.95884714	35.34659816	40.91778274	39.61662129	40.14860653	41.30284663
YALI1_B16808g	YALI0B12716g	179.4085077	207.2463257	225.5359766	160.7497573	165.0660986	208.9812584	204.4193251	187.4595489	173.3162311	172.9091601	198.4929811	183.633043	227.187187	148.871513	199.4752167	164.3268532
YALI1_B16863g	YALI0B12738g	63.92218087	48.05499033	52.80928677	55.03416712	56.98283905	69.05287939	45.45570813	75.54939765	51.46619509	52.65481038	51.99630798	45.63211614	66.74937769	49.02808023	54.08851331	58.98730309
YALI1_B16922g	YALI0B12760g	7.259122777	3.559264045	10.10802152	5.108763803	5.40023317	6.733304734	6.656908176	5.762456145	33.44392372	18.0455718	17.72336425	24.85916118	36.06938201	22.94184046	18.32060113	22.49817687
YALI1_B16944g	YALI0B12782g	53.56625539	43.9866391	49.89008234	53.03917856	51.14327538	57.13303712	53.21973212	63.29914123	49.06057628	43.48934488	49.6814891	51.4296728	54.22406647	40.44154077	50.88272592	47.04449388
YALI1_B16968g	YALI0B12804g	969.6036618	1200.67316	1235.314139	838.3797872	969.6442944	862.7619149	1029.220494	870.5135201	1107.844568	1042.125117	835.433531	1069.270741	537.4845085	1047.806413	1095.351757	867.7063906
YALI1_B16996g	YALI0B12826g	2015.750548	2747.63206	2599.43964	2119.761334	2237.227588	1869.716637	2391.521	1512.258818	1490.014424	1649.217774	1923.743011	1783.186098	1137.738463	1823.796168	1795.972292	1607.472677
YALI1_B17008g	YALI0B12848g	2531.755891	4075.439302	3168.436747	2403.260689	2557.719934	2192.515758	2682.692456	2092.723382	2047.940116	2317.966406	2306.781695	2322.7823	1399.842466	2146.413146	2122.225687	2074.452755
YALI1_B17039g	YALI0B12870g	15.70414185	21.74275067	19.83346096	13.99182399	15.29633232	14.3313677	17.35768575	14.93000001	22.55391504	20.12073811	18.50117697	19.58443217	16.59965904	18.04356677	19.19907068	19.40979325
YALI1_B17050g	YALI0B12892g	16.70694505	22.58739808	20.47837426	16.73984734	17.13670299	17.84956084	19.81596197	18.73002626	21.86913006	24.35301751	25.49196471	27.25540363	26.31364084	22.60848952	26.29327514	25.86489916
YALI1_B17105g	YALI0B12914g	33.098618	31.47166647	34.1760737	36.40977903	37.69270603	39.63089708	32.21671536	38.89644013	32.00518235	33.77902592	33.04829054	35.2082512	36.72225101	31.60337755	33.90404807	34.30369197
YALI1_B17112g	YALI0B12936g	85.5659723	82.30681738	86.57650448	92.67672375	94.69238354	94.56414519	90.09659042	92.61786608	76.72604222	75.84678335	73.63982437	86.6176982	65.63121412	71.66563149	81.05084271	68.1806796
YALI1_B17132g	YALI0B12958g	102.8027052	116.729399	113.2964003	110.1338951	126.3913442	115.4952205	127.13671	95.33001557	85.0976016	111.1245908	97.08407517	105.1583891	65.45325137	116.7136883	112.0879084	101.7580607
YALI1_B17155g	YALI0B12980g	1.986516061	1.209801039	1.907865501	1.829615182	1.854860421	2.451703937	1.826020341	2.348381641	0.914225983	1.794246008	1.085551355	1.356757723	1.552948934	0.866116872	1.247147264	1.06798158
YALI1_B17214g	NA	0	0	0	0	0	0	0	0	0	0	0	0	0	0	0	0
YALI1_B17228r	YALI0B13024r	0	0	0	0	0	0	0	0	0	0	0	0	0	0	0	0
YALI1_B17229r	YALI0B13035r	0	0	0	0	0	0	0	0.220504616	0	0	0	0	0	0	0	0
YALI1_B17261g	YALI0B13046g	3.042426458	1.439337521	2.350008379	2.47424443	1.921797265	2.335281086	2.681722819	1.914102566	0.680128724	0.396835491	0.172159469	0.273019689	0.495933611	0.433817533	0.344243989	0.341811436
YALI1_B17285g	NA	9.916056603	10.85886757	13.0608985	14.21850872	14.37036838	12.32741729	14.50343509	13.87161389	19.5465566	22.40953361	20.65913625	23.92937277	18.92570176	20.44369616	19.01084449	22.99243708
YALI1_B17292g	NA	38.94305866	37.49457923	28.3390173	34.47628502	31.82831305	40.24225991	34.39924196	41.3008645	115.927247	110.3429428	81.81017954	102.4993919	99.04502682	92.42670202	100.9473801	87.59564329
YALI1_B17299t	NA	0	0	0	0.068380777	0	0	0	0	0	0	0	0	0	0	0	0
YALI1_B17363g	YALI0B13090g	0	0.045693255	0	0	0.032572835	0.081227168	0	0.012760684	0	0	0.068863787	0.022751641	0	0	0	0.01340437
YALI1_B17406g	YALI0B13112g	1.090971104	0.778862295	0.74588824	0.535293266	0.4996969	0.768427472	0.573095446	0.665585665	0.397477826	0.385561755	0.10564331	0	0.126801207	0.137477387	0.062129597	0.191926207
YALI1_B17441g	YALI0B13134g	0.996969934	1.026606069	0.80446711	0.895004126	0.953074533	1.082242967	1.059606703	1.386821482	0.761495979	0.622035312	0.575697266	0.285303594	0.615418341	0.632116636	0.772366774	0.812433226
YALI1_B17468g	NA	0	0.028118926	0.049867552	0	0	0	0	0	0	0	0	0	0	0.090241567	0.074767925	0.098986117
YALI1_B17493g	YALI0B13156g	236.3803582	196.6236394	212.2304841	235.8742691	232.3923719	234.4859762	221.5021624	252.4251486	234.3769247	260.3104685	223.0761484	237.9064538	239.0178832	244.2541637	246.3676875	235.6915905
YALI1_B17518g	YALI0B13178g	24.63415279	21.55533419	27.10868768	24.86981385	27.17433913	28.37515035	28.54300227	30.91842921	22.10371908	22.59003104	20.78554014	19.65428547	24.81327487	20.24676533	24.95004232	23.52812944
YALI1_B17569g	YALI0B13200g	15.5332773	17.65758709	15.77139244	20.80506494	18.24893081	13.25018182	14.42426658	18.2031154	9.646289981	8.549324608	5.887853831	7.461116197	6.607927914	7.465022121	10.1260888	7.260979695
YALI1_B17592g	YALI0B13222g	28.3154243	33.14413696	34.21046681	25.76696777	29.7895902	30.5483282	37.70933199	24.55264159	18.08439537	17.7208155	18.22399551	18.35912187	15.85932376	15.65487183	22.73044349	17.32072768
YALI1_B17624r	YALI0B13244r	0	0	0	0	0	0	0	0	0	0	0	0	0	1.147637319	0	0
YALI1_B17660g	YALI0B13288g	13.25605848	13.83754138	15.58808765	20.30269204	19.17425485	20.70141176	14.57268896	24.09381127	20.43141216	19.80876744	24.00599443	18.95138562	36.24932509	23.14817737	29.21461271	30.98766013
YALI1_B17695g	YALI0B13310g	130.4838843	103.5562003	111.6030486	118.8897139	123.3131027	136.2968758	133.9394275	134.3413907	96.53194567	90.82589951	94.04685797	107.5415812	120.3212595	87.71155148	105.0156751	101.3370375
YALI1_B17724g	YALI0B13332g	52.93914652	37.95043875	39.62933356	33.90679538	40.88113894	40.30759135	36.22052943	53.66304536	29.70738379	30.62700214	21.6071925	23.59002315	30.6476781	26.74217668	28.95976826	29.38311361
YALI1_B17773g	YALI0B13354g	19.75593351	17.90403301	16.89175523	17.18299761	20.47959654	18.97970029	18.73879893	25.02891299	25.94615816	26.35881937	36.10984237	24.36027791	49.47985513	24.83629041	30.40869434	37.77766824
YALI1_B17805g	YALI0B13376g	5.101548132	5.879565777	4.903928697	5.503416712	6.801611604	7.448852879	5.836451749	7.242621481	10.86667432	9.392911654	7.253810318	7.076895905	9.199525799	8.207944243	8.745337818	9.16941967
YALI1_B17838g	YALI0B13398g	106.8606839	124.6278969	138.1917278	119.6554616	135.9961281	121.9766703	145.3172605	113.2721668	112.3199491	115.6546208	122.8189765	119.5956766	103.0939282	115.187428	119.8617715	107.0469787
YALI1_B17853g	NA	0.578294896	0.827651405	1.345483002	0.57457055	0.442498891	1.839105696	0.845826403	0.375597485	0.659963182	0.539097271	0.467754028	0.360592042	0.982509983	0.22134724	0.045848256	0.606990341
YALI1_B17871g	YALI0B13420g	135.3029406	138.9018179	141.846083	143.6669496	149.2361864	139.851994	153.5197437	155.0066413	75.22453011	91.30667035	83.3037966	80.15078022	75.85705018	94.33852007	92.27801592	88.04423178
YALI1_B17908g	YALI0B13442g	31.78772236	39.096291	40.19324677	32.27223624	36.70551344	35.34904827	42.85753296	28.30479169	17.7987258	20.28325403	22.26021931	26.20135831	21.34064318	18.52278663	24.86909697	19.41287891
YALI1_B17927g	YALI0B13464g	78.52024759	61.51664066	71.40073789	65.38000897	67.56598743	67.16827236	66.46316511	77.59460946	65.52061617	62.56316774	59.8540448	70.49921098	77.67511908	56.90676876	62.76264149	64.17099863
YALI1_B17964g	YALI0B13486g	24.27251889	37.97545403	32.95223155	21.99178931	26.8915801	25.98695339	33.57068342	22.19006254	22.80371017	27.36061519	24.3967609	26.0767569	20.03011014	22.16737855	22.79695173	22.81490092
YALI1_B17968g	YALI0B13508g	10.10112449	24.87407636	21.63789401	10.51207262	10.56136425	11.03828803	15.96787413	10.28291392	24.55412687	22.99017798	19.12680296	18.98481283	22.90819162	24.70587005	26.55251646	25.11854666
YALI1_B17990g	YALI0B13530g	139.175466	120.4794914	132.2117421	146.5715199	150.4823658	155.142174	162.9799675	159.2598082	117.8752845	117.0673088	111.8476028	121.040653	124.6072515	101.8902174	126.4862267	117.211439
YALI1_B17998g	NA	3.374271138	3.772837539	2.31952741	3.457306966	2.366760121	2.682732161	3.260810439	4.340973892	2.085846938	4.325142782	2.729280385	3.306293485	4.197236292	2.986664704	5.08284702	5.002658469
YALI1_B18012g	YALI0B13552g	77.12649696	93.53418418	92.72204019	73.36569384	80.92743793	76.92882914	94.86335755	69.43455198	52.04480278	55.41963331	63.42396396	60.20166549	56.01704843	55.6327004	65.93154485	58.38263931
YALI1_B18036r	YALI0B13574r	0	0.357599384	0	0	0	0	0	0	0	0	0	0	0	0	0	0
YALI1_B18069g	YALI0B13618g	66.75327872	78.90594165	83.76079499	77.72328818	78.07667662	89.05080593	72.29414267	79.39601337	142.1074697	158.3024925	170.3038922	176.6060417	196.3710345	140.0405639	167.931419	147.82945
YALI1_B18134g	YALI0B13640g	265.6857037	264.1334241	294.9478326	307.2947773	305.0172988	293.6855128	340.6211374	278.781847	472.1362618	432.986516	580.8680378	541.6679073	661.0608697	419.8045518	481.9181741	473.2223011
YALI1_B18190g	YALI0B13662g	28.59498175	36.87187008	32.40167702	30.16495386	33.98391479	34.0970196	31.86348893	29.72998551	44.5475148	43.28951084	32.55568037	32.54600749	33.72816414	36.5056935	36.61441722	36.78361469
YALI1_B18205g	YALI0B13684g	45.21478721	80.21476522	66.211782	42.2139888	54.41493379	54.2122898	66.27178846	58.22312883	85.87307451	74.31970745	59.05263215	55.67761079	41.12348367	63.2210618	58.64661633	64.35904949
YALI1_B18207g	YALI0B13706g	28.6054016	31.39991533	30.92026585	28.49438724	29.12497238	29.60520613	29.79198821	30.04884839	24.81234427	22.53539977	23.29781751	25.38613287	22.97841534	23.89740768	27.77957226	26.3699584
YALI1_B18236g	YALI0B13728g	2.24304382	1.741719353	2.373842136	2.015221708	2.724621845	3.698225188	3.136132392	3.107601813	0.617259682	0.504214506	0.145829197	0.192719781	0.65638272	0.129390482	0.214408021	0.738028844
YALI1_B18260g	YALI0B13750g	18.83830886	29.27488812	24.97452135	18.02066956	20.76399062	20.18396073	21.29758465	20.53785368	27.38525273	27.0738594	23.94444279	24.03239167	26.31774521	24.22820996	24.78556718	28.38849413
YALI1_B18265g	YALI0B13772g	40.61075909	47.93222411	42.13808129	42.15731856	44.36420126	43.49714858	37.54411947	46.24471799	48.53204251	49.28696797	36.05019275	56.31031092	42.96024902	51.7281582	48.47765346	49.90446965
YALI1_B18292g	YALI0B13794g	1.829601065	1.669301142	1.397978303	1.327859265	0.991646562	1.514637682	1.88873981	1.048912019	1.885708754	1.177921838	0.83859496	1.212138155	1.910864705	1.292810609	1.232959442	1.224246904
YALI1_B18311g	YALI0B13816g	63.36568199	46.3435048	43.96448037	59.18421957	57.5261322	63.82580949	49.65651622	86.65584031	52.60160394	48.92981603	39.37949202	44.29219421	50.25619541	46.45466663	51.57584935	52.02339123
YALI1_B18347g	YALI0B13838g	197.8670133	141.9960833	147.0506929	174.4707235	173.4025892	185.1796216	161.7881481	273.791504	298.3325109	235.5591604	264.6854749	294.5225558	339.1598607	256.3074655	287.1415083	304.6097738
YALI1_B18368g	YALI0B13860g	63.76641184	54.63951291	46.06187023	38.66632996	45.46482021	37.96301336	52.74967745	43.23856954	46.02374823	50.75317068	32.8371534	34.19930845	36.3140861	43.2981413	39.00721357	48.76368721
YALI1_B18375g	NA	9.649224535	14.21242992	16.6477835	16.44420913	15.10337213	15.90752862	16.90686147	15.21481847	18.60832189	15.08609802	13.28795643	25.48911819	12.67606309	18.33618399	18.66207411	17.71950484
YALI1_B18384g	YALI0B13882g	122.7451669	160.8227661	186.9460551	141.0783758	128.9323203	128.3700175	154.066441	134.9799486	212.2949987	228.2354706	241.0891546	236.1946891	170.1004827	253.0320644	230.4506647	207.0609597
YALI1_B18391g	NA	0.025755991	0.052220862	0.092611168	0	0	0	0.182974691	0.131252747	0.333124273	0	0	0.078005626	0	0.083795741	0.138854718	0.06893676
YALI1_B18451g	YALI0B13904g	22.6415121	17.13460918	20.39154382	22.23719782	20.94895182	23.28397972	23.82046903	23.31068166	18.60456041	18.89497569	16.05466455	18.5615969	21.68761861	15.52617576	18.18817474	17.77856151
YALI1_B18460g	YALI0B13926g	40.41980673	40.38449476	42.08428227	49.46909387	46.85622588	45.4400283	40.89598235	46.68186407	49.78203606	41.25771809	41.09539385	35.1073866	41.25406249	42.167338	45.4936454	42.04856327
YALI1_B18472g	YALI0B13948g	468.6688935	369.5670435	383.0513658	488.8536014	447.5507528	533.5406545	491.996073	566.4595133	324.8586269	255.7207904	170.127987	232.3397556	245.0221995	219.193946	256.3605233	259.7766913
YALI1_B18499g	YALI0B13970g	770.3818639	609.0545595	646.1260593	962.6919017	949.5560592	890.1093056	976.2565402	825.9780356	758.6755872	723.1132431	942.7643484	915.2083183	1071.089177	752.6996838	848.1582559	842.467937
YALI1_B18536g	YALI0B13992g	31.47782568	29.60535396	29.68793332	35.12633503	36.33885323	33.83986973	45.04377846	32.87116067	25.27565707	22.46397373	28.40448733	27.59621276	28.82285534	21.07144574	31.37478781	27.97297829
YALI1_B18572g	YALI0B14014g	96.31136229	72.15339442	70.93863621	121.0476506	120.7224022	121.4013267	97.90420807	158.3596672	266.5212626	293.4735071	217.6931082	223.1734552	245.3773815	299.5186028	237.3152329	285.3179494
YALI1_B18607g	YALI0B14036g	232.966655	207.5967578	205.0491396	198.3604688	193.5390159	204.9033421	205.2857279	225.2972339	205.8323633	208.933886	202.4396707	197.873645	192.8597593	212.7303938	182.8776719	215.5732034
YALI1_B18613g	YALI0B14058g	78.03197147	98.69743001	81.61749366	84.42797761	83.40109706	94.46080799	86.99521417	116.6527227	108.8642638	118.9436355	95.68197709	143.4733805	79.61406138	116.9021198	112.7063465	114.6751387
YALI1_B18631g	YALI0B14080g	61.63886708	52.90291609	52.17651616	46.59572187	43.26683057	47.5887703	54.36401094	69.91299388	25.91863716	23.07142184	18.74773694	23.77767045	19.84421331	19.94907326	20.49645648	24.11449883
YALI1_B18645g	YALI0B14102g	146.9097238	90.94959254	114.9496999	139.950716	141.7126234	144.4704991	131.1200302	162.1702437	106.9697896	104.4010107	121.6587833	128.6097004	160.4366955	115.8567882	120.9169999	123.6953254
YALI1_B18687g	YALI0B14124g	23.50556145	25.73672567	22.70999477	19.79395544	20.59417493	23.14974294	33.50152238	23.34248079	18.25416914	18.12546105	14.77128242	15.69863213	16.04035272	16.12151493	17.23751149	17.46254307
YALI1_B18707g	YALI0B14146g	1792.805863	2345.795955	2151.017851	1915.772116	2070.403845	1818.792335	2105.520268	1812.133765	1453.476724	1547.204888	1830.399472	1831.312068	1384.256979	1589.186223	1687.22368	1560.192076
YALI1_B18727g	YALI0B14179g	23.62566513	42.90961714	36.28317187	22.81152902	28.81867774	24.78116997	34.02864068	23.74784878	28.795488	29.67906693	35.44567541	34.78522046	32.88111887	28.96279056	33.96056919	29.91154341
YALI1_B18741g	YALI0B14201g	153.1209191	138.8540149	139.7033885	164.6111249	171.5943675	186.800118	112.777443	221.1055318	151.1701896	158.499237	170.7205593	140.3678337	209.0731479	173.956929	165.5717042	189.9083159
YALI1_B18764g	YALI0B14223g	20.53713541	17.95540311	19.18709878	22.15741281	23.34743027	23.56800224	25.26279674	24.66963952	12.94709861	15.86394297	13.80153639	14.79196227	20.11862021	14.93127538	18.58373518	16.68063815
YALI1_B18798g	YALI0B14245g	45.52978893	44.57493994	50.94051067	56.08218973	51.01380066	54.91700972	51.6817194	53.9869791	50.60503401	54.56434518	58.65301404	55.64523937	62.75531879	53.96524756	55.7744034	55.79325149
YALI1_B18811g	YALI0B14267g	218.8383546	205.2906544	195.6892495	244.0594706	242.0291931	246.2157923	241.2301735	263.3743879	264.9237405	273.9498255	225.3994401	236.8718824	236.069358	261.5633769	243.0151963	245.0812124
YALI1_B18845g	YALI0B14289g	58.18456034	44.6596417	49.51503981	79.72711229	83.93008697	86.68339317	91.32487673	67.1018356	43.50143523	35.55098639	59.69777992	70.66502717	73.87700683	37.83883358	48.16343481	41.2614243
YALI1_B18854g	YALI0B14311g	40.51710444	49.31588153	50.95000616	42.39608143	49.22203976	45.2634747	50.04412589	35.9530355	24.92447779	20.7875262	27.8341656	29.23109009	26.39287404	19.12499795	23.92125892	21.00713609
YALI1_B18887g	YALI0B14333g	6.145269895	6.451498676	6.093125175	7.301248293	6.624067168	5.257298845	8.042613624	5.605469726	5.190891264	5.38007606	4.470285439	5.524292011	5.294355088	4.572439395	5.537201179	5.415935894
YALI1_B18902g	YALI0B14355g	172.6512374	131.8451032	150.6282601	171.8114469	177.0559654	176.0305487	170.7068343	189.1415299	190.1993326	171.0282273	150.5366296	157.8950979	191.1170785	146.3974497	148.2549465	152.982974
YALI1_B18921g	NA	1.123897797	1.352995072	1.641743427	2.817820829	3.350348742	3.987515531	2.619864898	2.744375627	2.044171675	6.49367167	3.702546496	3.510253148	3.477975971	6.856015151	4.733683572	5.828289726
YALI1_B18930g	YALI0B14377g	1471.924212	1366.957426	1447.392189	1482.361682	1432.334563	1438.70616	1364.388437	1609.255819	1746.692628	1622.320792	1579.998807	1712.454399	1567.427718	1609.007546	1536.92623	1573.554968
YALI1_B18955g	YALI0B14399g	261.567544	228.0641725	224.8552845	245.7876351	235.30616	243.096669	231.6047899	276.9017336	201.531857	195.1954413	179.2386661	207.1400383	203.1963986	194.5799947	209.1707473	197.140751
YALI1_B18971g	YALI0B14421g	5.599655494	7.869991151	5.834503563	6.515883521	5.725154763	5.848356112	9.493157512	4.48575566	7.818622641	5.462323816	4.010302919	5.347973914	8.401698816	5.615546919	7.718688742	7.153202646
YALI1_B18975g	YALI0B14443g	56.53218029	46.78944257	54.0338261	58.77150894	60.0174542	64.08343412	64.06085905	61.17396367	57.37778425	53.88947773	62.2674508	62.94247024	70.96370225	50.13658091	64.0916271	60.6940631
YALI1_B19021g	YALI0B14465g	67.78228061	65.73697304	70.07307128	73.84424762	72.96106906	75.79039769	77.52456448	71.22663068	60.45726621	66.66075541	72.03636198	79.38069273	77.61044116	65.27935842	73.25972709	64.9525238
YALI1_B19044g	YALI0B14487g	977.9902173	888.9622689	880.7256518	835.407624	893.1840105	881.6327872	821.146397	866.904275	759.7826135	674.4106856	691.6035654	670.7784687	705.3281267	671.3669292	680.8809874	680.3375367
YALI1_B19079g	YALI0B14509g	613.9429661	939.2407885	991.8656057	1289.971014	1211.588261	1028.827091	1051.714413	993.3628472	917.4733125	1167.545387	1208.223159	1131.867673	1009.455565	1171.810356	1192.506385	1147.975188
YALI1_B19107g	YALI0B14531g	58.81782157	53.77064287	60.85449953	72.32406795	70.27326466	72.6852144	73.40629819	77.32151095	69.64267394	63.95451976	75.39474024	73.30431873	67.27099461	66.6671705	67.41172605	67.55802499
YALI1_B19120g	YALI0B14553g	28.62327139	23.09657333	24.21346683	22.67650714	23.51925727	26.82579299	27.19011732	30.44895466	23.26887282	20.47264122	16.70388281	17.62960472	21.93552509	17.67230686	18.14160628	19.12356792
YALI1_B19143r	YALI0B14567r	11.79109276	9.979406812	15.16970926	23.75274653	19.70005061	21.93133542	10.75891185	20.58043079	16.43968287	25.71493981	31.23661401	50.6178504	18.74629048	44.69664811	52.6328809	34.06854689
YALI1_B19153g	YALI0B14575g	12.74392331	17.92677826	14.96368113	11.99317637	14.93888378	19.22747215	17.06301659	15.29184406	4.392220722	6.653789601	2.773418291	4.600194765	3.006172914	4.399276388	5.059637673	4.47301992
YALI1_B19205g	YALI0B14597g	50.12240222	40.81006378	46.09928447	45.89099934	45.71608624	52.120953	47.31536232	53.79869076	33.82015463	36.17826015	30.16803799	32.32741411	37.90813913	29.49032172	36.69571092	34.21830606
YALI1_B19217g	YALI0B14619g	37.13864926	24.37980594	30.77981907	33.95990925	34.01573083	37.09597782	32.43075184	44.8248019	29.72652345	29.43797824	21.5469669	22.48463805	22.99328559	23.97181459	21.91982384	26.93281359
YALI1_B19276g	YALI0B14641g	74.19078245	59.18005873	67.03770486	78.46704668	82.55452524	84.81923269	79.40178248	90.67996839	136.5620829	150.4966926	144.6479956	140.3366191	155.7824002	148.9093893	150.9401551	151.635314
YALI1_B19290g	YALI0B14663g	218.4149594	200.0774963	194.2220496	209.9117049	203.5697114	213.4964409	201.7295971	222.5792558	256.7877712	258.992763	231.2490412	243.4719132	234.9885427	261.9225093	252.2060797	257.7271199
YALI1_B19323g	YALI0B14685g	123.7445598	78.79784051	88.98748651	103.9566264	122.7768627	128.1122453	96.14859044	161.8826278	130.19607	105.2813786	152.1409259	132.9119108	216.6105378	122.2362248	132.573964	172.3178528
YALI1_B19326g	NA	27.78811525	22.48611173	23.90897484	30.48716143	32.59674166	34.07069845	25.46957343	32.74695839	43.64233594	40.3679993	35.25320497	27.35206429	26.92373524	36.80862446	33.90793999	36.83373316
YALI1_B19336g	YALI0B14707g	71.63101463	59.83212079	55.32197679	55.20454491	65.49671402	69.01363236	54.60088035	72.59705068	85.99525434	77.05599408	56.32558287	60.43213019	61.16942799	67.49356158	71.3501012	80.9846199
YALI1_B19348g	YALI0B14729g	84.48268118	65.41123793	65.17102346	59.06838739	72.9324936	74.70988249	56.95894507	108.0904978	67.48705859	61.90633658	44.28346617	52.29130049	55.52997811	58.05319626	58.6334467	62.73245178
YALI1_B19388g	YALI0B14751g	36.18691608	47.69411942	43.61633279	35.71967357	42.33577886	37.98004702	55.21672288	28.27189305	15.06378853	16.16949612	18.21796878	21.0843721	16.73775936	14.05276667	20.48140992	15.41450194
YALI1_B19390g	YALI0B14773g	20.84625536	20.15695619	18.98792037	15.31263161	16.07913582	18.19303961	17.08370235	21.64675992	26.2997828	24.02658518	19.03927216	26.23160765	19.65418713	24.09603658	25.25222949	23.46983336
YALI1_B19429g	YALI0B14795g	3542.247843	3850.22374	3449.035148	3509.528837	3716.293611	3730.881273	3141.218013	3678.010346	1891.869939	1511.312109	1944.821218	1795.910359	2118.973447	1672.785094	2198.862747	1865.578232
YALI1_B19453g	NA	88.11483209	94.53298149	116.0746173	82.24995603	89.05990328	99.01488987	84.02359953	108.9730089	147.2177364	104.3426179	91.63242204	91.02960274	89.40929683	95.11346926	99.56674232	109.0335214
YALI1_B19485g	YALI0B14817g	42.10555659	34.5590819	41.2878804	36.77981506	38.8439067	44.50183544	41.14380906	43.99549058	30.31430884	33.36540764	34.97828839	33.57694605	43.85353928	33.37680512	39.17410281	38.86827824
YALI1_B19490g	YALI0B14839g	25.74103609	20.48236988	26.07751234	24.46002434	20.77936725	25.05989151	26.54608626	27.68162781	17.63946755	20.06195424	13.40844585	16.25788214	15.62190874	14.37096954	18.06007172	13.98897353
YALI1_B19507g	YALI0B14861g	466.4553091	510.5121183	450.973511	499.5013114	513.9993362	476.6229726	477.8773731	515.389839	439.6006609	469.5886643	399.3334521	461.2515973	403.290457	482.7526935	452.4220996	457.2975307
YALI1_B19520g	YALI0B14883g	18.47568966	20.86047304	20.97631084	16.81244458	17.03356212	15.91941512	20.68074964	17.9791605	15.84616124	16.18926138	20.83203081	18.9132	20.43979153	16.79313873	18.04103423	19.45888703
YALI1_B19567g	YALI0B14905g	96.57061373	95.74363696	89.98622884	70.63882407	79.79638661	73.14971731	85.32540383	73.23131228	74.01701628	64.13254683	62.70655473	58.83024884	60.38721024	56.76837147	61.68180214	62.32907569
YALI1_B19576g	YALI0B14927g	96.26549356	98.97861927	91.75629535	78.72928652	79.07682096	80.60234385	95.35356568	85.97265293	60.31471211	62.63895595	55.14400214	65.68223679	52.46643799	54.82175192	62.47794744	51.90584521
YALI1_B19587r	YALI0B14938r	0	0	0	0.652547982	0	0.835479445	0.274462037	0.131252747	0	0.408173648	0	0	0	0	0	0
YALI1_B19602g	YALI0B14949g	30.31473887	24.58753475	29.40348172	28.8758443	29.90114838	30.67537577	29.36259057	30.23489368	24.83824892	23.16049864	22.63194536	24.1677295	28.15450143	20.59247157	24.55559434	24.96249627
YALI1_B19668g	YALI0B14971g	71.03719096	45.64519261	60.66101062	69.63289994	67.99622132	75.21355052	72.02824154	72.51097966	50.95600026	51.85277328	58.12186446	64.74935772	74.89864369	59.13738027	65.23641903	62.19224862
YALI1_B19713g	YALI0B14993g	117.1713627	123.7074931	130.6478972	114.9338975	125.0398013	120.1001702	141.347949	107.5803769	89.88406721	107.7772799	107.6804775	114.6682695	82.85380654	104.2359161	114.480756	96.59353185
YALI1_B19747g	YALI0B15015g	50.22307422	40.40411291	46.36072534	45.85858179	47.93113699	50.55429781	52.08281393	48.44958839	35.3042428	33.98323785	39.26717891	37.15731381	42.80896081	33.03559916	38.32151158	38.06456461
YALI1_B19774g	YALI0B15037g	57.68155893	59.96638444	55.99929224	56.67221807	55.90527101	58.16292756	64.10434044	63.14523622	47.05928257	44.11139773	46.21122582	52.14316829	50.23774849	45.62319746	55.80909122	47.30331637
YALI1_B19844g	YALI0B15059g	219.1803996	283.0950003	316.2709095	230.2029503	217.5166162	221.169864	261.6542469	192.408855	230.3405902	244.7389243	214.2452408	224.8115026	230.3988265	184.1688446	195.0171935	198.1259664
YALI1_B19856g	NA	0.557603933	1.017499278	0.701744415	0.470910915	0.604444361	0.301461655	1.089359631	0.284155432	0.72119688	1.030954059	0.255576943	0	0.690216881	0.952420661	0.450919961	1.094459904
YALI1_B19877g	NA	3.547680075	3.242747103	5.541732775	4.788860187	2.395679477	4.716416219	3.925102248	2.864979324	3.196918426	3.379502245	1.8659865	3.875118171	1.919743009	2.743634737	2.900271935	3.061385157
YALI1_B19880g	YALI0B15081g	346.2606836	382.8282414	374.4526762	345.2099664	332.1560561	336.4429308	315.9007219	353.4709405	438.5210915	374.6656148	333.8057326	391.4495634	293.6753531	389.4011348	363.6836492	351.23024
YALI1_B19897g	YALI0B15103g	2119.889284	2973.378934	2818.885874	2403.526586	2628.367955	2199.303051	2800.004587	1765.92226	1638.610378	1987.003474	2182.53624	2174.01002	1215.30968	2154.297675	2377.172708	1966.686073
YALI1_B19932g	YALI0B15125g	473.1976988	396.6267281	395.926845	459.2182204	487.7393481	440.4821513	469.9221967	396.7264197	403.2241041	404.14371	332.0353157	284.2176542	332.262932	351.5848094	300.6239889	365.1758653
YALI1_B19962g	YALI0B15147g	62.46119713	55.61632801	64.98391834	63.39004525	65.42433844	63.72305863	66.44041702	68.64091093	60.07207365	56.37537167	55.56897979	53.63328712	56.70923568	51.39551225	55.15934839	53.58026689
YALI1_B20009g	YALI0B15180g	51.57164312	65.91187443	63.58253726	72.8402076	76.0548093	71.01181927	58.0892957	91.16751565	67.38708809	61.42206276	74.55963975	60.37282847	110.8495676	69.59307281	86.40764365	92.83094234
YALI1_B20043g	YALI0B15202g	74.25452256	52.16864158	61.54012091	60.68696228	63.02843572	62.81761074	66.31688967	74.50234072	77.45139346	67.75682554	60.60505184	63.41857354	69.10303507	64.51224589	59.95920296	65.1280042
YALI1_B20052g	YALI0B15224g	139.1011982	124.3939154	149.6573881	147.5792966	139.4480519	147.686275	147.0045447	156.6869688	153.8668517	150.7753633	126.7621566	136.4147158	132.3080026	140.9914433	139.4727909	133.821384
YALI1_B20094g	YALI0B15246g	16.8774373	16.94317776	18.95264444	18.76429323	20.1584161	20.85300512	22.71307312	19.40177542	14.45405264	13.89871114	19.31920529	16.45224939	21.39722238	13.96603253	19.23672482	17.43905634
YALI1_B20108g	YALI0B15268g	114.958424	96.5258694	101.3175344	77.41200395	84.17336568	91.10310511	102.7511589	107.3716782	93.79427239	91.28002104	59.48194872	68.98477694	67.0615177	72.39205304	80.83819232	78.99288165
YALI1_B20130g	YALI0B15290g	50.70710763	47.41436723	46.86510964	56.81245864	55.92755769	60.43301316	47.257026	75.08386331	67.72138865	65.477856	60.73786057	60.01882836	78.60547729	69.41080524	67.02632955	75.46660332
YALI1_B20145g	NA	2.250624195	2.83359512	3.589459686	2.452529327	3.226678151	1.275648145	3.288018362	2.743975222	0.821632015	1.342316023	1.747014206	1.209348959	1.722453983	2.066774142	1.957012805	0.809659935
YALI1_B20153g	YALI0B15304g	166.3860573	233.5518405	197.9322446	177.4733672	194.5437878	186.2492934	217.9037905	151.3533738	110.2096286	113.0611156	125.9942935	131.7532128	102.976489	110.7459522	142.5989724	118.8043775
YALI1_B20188g	YALI0B15312g	32.25147981	36.0993698	34.39609752	20.35573699	24.91276978	24.56744389	28.85422455	20.32221906	17.22896449	14.28607767	14.14651635	10.99183359	10.30813681	11.02272225	14.74234479	14.17175777
YALI1_B20192g	YALI0B15334g	53.6322988	50.89951638	47.73684733	36.95025481	40.74565541	41.89352737	42.8881587	52.07905728	55.47023878	45.21519533	31.7608135	39.96015452	45.31029807	34.45359219	39.98384724	43.73886563
YALI1_B20205g	YALI0B15356g	23.30293158	26.58260444	25.31711898	21.65697514	24.5889031	23.67038404	22.68241327	26.1363538	27.27363265	25.14223802	24.08109009	21.32440128	24.94688069	23.87624894	23.61982983	24.98881636
YALI1_B20242g	YALI0B15378g	23.16995044	20.79907553	19.46148598	21.72808414	24.46660082	25.56680003	22.61344647	28.33906447	15.81102335	18.35954036	15.41059893	16.7243007	21.50274311	16.78264492	19.35756737	17.7828894
YALI1_B20243g	YALI0B15400g	22.46648986	28.45871485	24.31813688	15.65442959	18.89947123	17.8648279	24.00781637	17.10861881	11.14197746	9.984406108	9.547074691	7.645416656	11.70670544	8.296575122	10.95213838	12.01422428
YALI1_B20276g	YALI0B15422g	39.03712402	39.4761673	38.4490303	46.08724427	45.46534636	44.3487874	37.83504806	45.01029317	49.06767184	48.88688472	51.92787495	51.2383243	57.79021774	53.91645129	52.27826867	56.14202698
YALI1_B20289g	YALI0B15444g	221.9929763	240.2823018	229.805852	277.2182553	284.7570056	252.388179	249.2412011	275.4445325	147.4277483	152.3976989	201.2423213	168.9475353	181.5217542	170.5968044	167.1745131	171.1774282
YALI1_B20319g	YALI0B15466g	1.87443393	1.01879741	1.908292745	2.026440757	2.178775852	2.747140136	2.326337933	2.522299665	1.387438256	1.252641466	0.569312314	0.341987085	0.652271764	0.844954964	0.776165987	0.513787545
YALI1_B20337g	YALI0B15488g	31.61952973	27.89171769	22.0217705	15.70503222	21.2649033	21.53489046	17.27443818	29.52617389	12.25369817	12.24078239	8.980674412	8.012920599	10.60179118	10.08684413	8.728871433	10.39434751
YALI1_B20359g	NA	0.221267379	0.224312341	0	0.155721677	0	0.797503106	0.08732883	0.041762238	0	0.129873433	0	0.223379746	0.101440966	0.119980265	0.13254314	0.17547539
YALI1_B20378g	YALI0B15510g	337.4289409	376.0767383	360.4539717	365.5817866	351.9911451	370.5942325	306.5411172	418.3337928	791.4800313	848.5819393	858.6033114	886.3774692	963.6321639	792.2960364	844.8058289	803.1119203
YALI1_B20399g	YALI0B15532g	2.575599118	2.6763192	2.77833503	1.495422458	4.048338064	1.740582176	3.430775461	2.351611724	1.873824035	4.421881185	2.508609402	3.022717989	3.58666272	2.147265856	3.037446958	3.159601509
YALI1_B20407g	YALI0B15554g	1.506236446	3.053928917	2.215634264	3.180138897	2.226497582	3.51641665	2.188747889	3.140097374	3.984840986	2.350873541	3.138096645	2.591959076	3.248679032	1.949046501	2.49147548	2.56549462
YALI1_B20416g	YALI0B15576g	14.48815343	24.99314765	24.87579038	14.6788806	15.76718034	16.95466875	16.32846029	15.48116443	21.61170131	23.27150708	22.72068219	25.50685004	23.89760427	20.65241696	21.48431828	21.88341341
YALI1_B20462g	YALI0B15598g	1981.327454	1484.780862	1562.059335	1768.824525	1700.924194	1660.396042	1740.363776	1878.70495	1659.958252	1706.748953	1608.301108	1711.131401	1776.365876	1796.323309	1736.611327	1700.335038
YALI1_B20493g	YALI0B15620g	47.81896947	41.58789145	44.33225357	41.63758082	39.02726753	45.21229148	40.19813218	40.94412627	55.60612864	44.6165195	42.14463795	52.16776217	53.50360684	44.03788467	40.22514372	45.92955838
YALI1_B20521g	YALI0B15642g	28.50681548	34.98155724	37.1431511	33.15113123	34.48982643	32.55744693	43.54272725	23.36460279	16.03160563	15.08625415	16.1547672	18.58547967	15.65544523	14.50198624	20.33595636	15.07662014
YALI1_B20527g	YALI0B15664g	75.8596603	63.91807099	71.17371604	76.65785367	79.50852953	82.44008742	80.11092512	84.76887741	52.93974932	53.30734051	50.08444653	57.98440124	54.718148	51.04498228	55.47445357	50.70927528
YALI1_B20577g	YALI0B15686g	43.79191521	38.60276367	42.41498402	38.58558844	42.24974959	42.31976282	41.96786594	44.74729343	41.92092766	40.70455297	37.8840804	38.09653634	45.38540176	34.69459479	37.57764531	40.8840022
YALI1_B20589g	YALI0B15708g	82.17029789	97.59596798	93.54882179	81.00876079	89.219001	87.21082354	104.1044165	79.40887442	58.03176255	58.90388624	63.04974514	69.18767288	60.45554334	56.18430695	68.31316192	58.48000383
YALI1_B20634g	YALI0B15722g	10.42622335	9.487626883	10.33415962	9.662729726	9.283257974	9.827594748	9.368656068	10.79680052	12.25993418	11.99664215	11.13550146	10.72952378	13.3656833	10.11793283	11.29529726	12.49257827
YALI1_B20709g	NA	0.823071892	0.059599897	1.479765396	1.117133773	0.892212437	0.953536323	0.626489432	1.148461539	2.661373267	2.018684889	1.212601475	1.869591351	1.698033558	2.199638194	2.139419162	1.888267779
YALI1_B20717g	YALI0B15752g	214.8854539	216.3575607	231.202333	213.5225361	201.055824	217.333442	208.5840006	218.1119874	253.8641188	249.1878861	248.4261134	231.9387579	229.7373707	228.579069	231.4914263	236.1514892
YALI1_B20730g	YALI0B15774g	150.4099202	128.4675254	147.4629896	141.1616541	136.8338765	143.3056491	153.1832038	137.6674612	86.8819688	86.68761264	80.16040523	87.60562016	83.06000799	78.91939825	94.75530419	78.6249031
YALI1_B20765g	YALI0B15796g	1.135540384	0.848228373	0.859595368	1.324924769	2.073143973	0.161556799	1.061455391	1.345159372	0.77299555	1.105000483	1.232699842	0.769281997	0.369895234	1.579850637	0.805510796	0.959782518
YALI1_B20777g	YALI0B15818g	34.28978445	35.41996594	39.59432506	40.1942805	40.5868016	43.4345335	39.29669486	40.63838724	41.17474542	41.95881671	43.12103168	44.91033981	45.4508995	43.6578263	45.73514571	43.00624327
YALI1_B20802g	YALI0B15840g	297.1000986	216.6196662	255.8113628	271.442946	253.5165729	270.8901144	269.1495969	265.062105	199.0851819	190.4956431	167.9853938	216.6235363	167.4460507	186.0785955	212.3007712	174.0462879
YALI1_B20834g	YALI0B15862g	34.6096607	31.76524869	33.06505958	25.92601083	33.11747974	30.62396221	33.75639809	34.38938305	24.20563633	23.33885067	22.88678314	20.09537831	26.42110119	22.93861987	25.02461471	24.24191211
YALI1_B20835g	YALI0B15884g	48.82580045	51.19631182	52.05603269	50.33308276	49.2628724	50.9347319	54.13912842	48.8220987	43.2473156	39.98548914	34.79492567	42.66674547	33.29358655	36.76025786	42.96666817	38.26364847
YALI1_B20870g	YALI0B15906g	36.21710407	28.07212552	31.92792298	30.97583335	33.82377523	38.27173893	34.5927874	36.80763943	50.66284077	55.5526019	55.34488825	46.48470033	67.53428811	48.82168074	57.55690413	55.6899027
YALI1_B20887g	NA	22.31927308	24.54223243	24.19327281	23.45831373	24.72395909	24.66174264	25.40427227	28.61468028	73.22211993	71.43038837	57.42244256	50.22904404	55.45643161	64.10752761	63.23744993	61.86036024
YALI1_B20899r	YALI0B15928r	0	0	0	0	0	0	0	0.186237006	0	0	0	1.328203894	0	0	0	0
YALI1_B20919g	YALI0B15950g	53.44065158	45.91903307	41.29913306	43.03617913	49.02020062	48.87964299	47.6164726	58.36886883	39.98471052	40.72932733	36.2871652	41.85231237	45.3998048	37.92003726	38.49338663	38.77490006
YALI1_B20935g	YALI0B15972g	22.88669964	17.72503806	19.08689515	16.67753025	17.91271588	20.87947281	19.53485193	21.58116217	25.83510548	25.83142102	19.41067046	22.03799219	25.56823192	18.95803278	23.46045363	23.25417116
YALI1_B20968g	YALI0B15994g	0.266004499	0.17977674	0.478237997	0.561619164	0.480582811	0.838903541	0.905499753	0.564817151	0	0	0	0.067135989	0	0.180298213	0	0.039553879
YALI1_B20992g	YALI0B16016g	65.90758311	62.06404483	66.05731045	65.53958472	68.31028939	70.04792908	76.9114792	61.59120032	50.69555544	50.55547315	51.93279422	47.36067843	43.91256982	45.9648533	49.01810954	46.07174426
YALI1_B21004g	YALI0B16038g	25.75770824	18.59410842	24.3968686	23.49897787	24.28630577	23.49089705	24.82661603	28.29809233	17.76107582	19.90526822	14.3236678	17.87368899	16.51458924	17.0985209	17.73869024	17.92968536
YALI1_B21030g	YALI0B16060g	35.59365998	54.16779242	55.38550483	48.87016949	49.63614496	51.35474194	59.81482435	44.1408696	20.36765256	24.88971918	27.67810987	29.40472927	17.88133298	26.34100893	33.00818136	25.31177999
YALI1_B21042g	YALI0B16082g	51.99386864	56.60067671	39.75931863	42.63927436	45.39182167	44.33431246	52.13672	51.64372213	60.22430152	62.55919497	61.17770024	49.67196928	48.86345878	58.32589018	55.73225258	65.33981795
YALI1_B21043g	NA	117.7239582	101.6082596	96.40136545	128.858086	143.320474	146.9309221	94.99436055	180.4644256	112.7070457	111.2903088	84.77897394	90.70320789	108.2788383	113.5665053	105.2981612	130.5287767
YALI1_B21070g	YALI0B16104g	237.5960918	308.7929379	285.3897323	243.1204689	257.1773381	231.9958689	288.5490089	209.8552449	143.8207266	152.3577715	153.910565	180.4256822	132.5495287	148.6172215	174.6946198	155.7983837
YALI1_B21088g	YALI0B16126g	136.1830526	132.4248499	142.3078311	127.4440008	132.9562112	122.5769502	127.6082634	143.699949	107.5231556	92.49264185	88.00417556	92.54625118	91.66156636	78.21674183	83.02966792	82.96778598
YALI1_B21104g	YALI0B16148g	6.694446559	6.382074254	6.535919292	9.360319407	13.07185247	7.31044514	12.83447476	12.2753594	15.48208711	14.75447366	9.245810157	12.75583794	9.14631659	10.24093848	12.90665986	11.98482528
YALI1_B21114g	YALI0B16170g	6.788827881	3.094893639	3.634033576	5.444907449	4.291554961	6.82056995	6.338092399	7.731395724	0.315523635	0.33137809	0.383365415	0.506634475	0.17255422	0.294796871	0.338189971	0.472607686
YALI1_B21134g	YALI0B16192g	28.05187469	13.97329206	38.33903177	24.55825737	25.13361978	38.09816213	48.99491666	23.75956991	14.35479058	11.06018917	6.975235249	8.630945017	16.71776204	7.836703817	11.62721631	10.67160815
YALI1_B21155g	YALI0B16214g	3.882451054	4.026013888	2.957214135	7.4461982	9.734369428	11.09585372	6.526932823	11.56642361	30.85734703	25.87149957	14.39913496	14.47378353	21.95015748	18.99523175	29.03965728	20.62436771
YALI1_B21194g	YALI0B16236g	86.47505171	81.55879429	76.51935822	65.32677036	68.83667734	62.45153	71.37847599	78.32876189	60.39324845	59.64628419	59.82311379	53.28263936	60.31262129	54.11462841	63.68892794	65.30006961
YALI1_B21208g	YALI0B16258g	44.94816706	47.49755238	44.94728671	39.59767121	43.51730755	42.45056776	46.32309268	38.11321765	22.98984566	25.10442367	24.18708105	27.53298559	25.58826687	22.49271056	27.24044739	24.1154928
YALI1_B21250g	YALI0B16280g	204.6774711	189.7949029	163.5470146	150.7916981	166.8395759	164.5020167	134.2629988	211.8510914	303.7396132	285.0570847	296.0502269	252.7273422	315.6040765	335.368093	268.5046601	331.9545481
YALI1_B21275g	YALI0B16302g	42.97147443	37.94990562	39.29547352	37.98724705	38.97026309	34.79956377	39.89439907	43.60530943	34.64702612	33.55200261	26.25730598	31.31544449	30.36028906	28.88673124	30.41279699	31.586954
YALI1_B21313g	YALI0B16324g	99.61540588	81.24232897	82.00029239	88.12868751	101.3777511	110.7899072	69.08267865	128.6323468	94.65690777	97.38270576	97.05398476	81.87271291	127.7632006	99.65453038	103.6609558	114.9141569
YALI1_B21320r	YALI0B16346r	0	0	0	0	0	0	0	0	0	0	0	0	0	0	0	0
YALI1_B21323g	YALI0B16368g	81.86262622	80.29231486	84.48016619	82.81198947	83.04022885	91.91734518	85.89574144	98.04488443	84.34683295	82.98579385	79.14038347	80.64581592	83.23361298	78.2332857	82.85645521	81.44982667
YALI1_B21356g	YALI0B16390g	49.15841764	41.71366477	45.84252799	45.60335319	48.15644945	49.69662213	45.47552025	57.87944428	38.71133792	38.65920526	29.08562138	35.31771941	37.74470091	32.39861183	35.20445913	35.85503907
YALI1_B21381g	YALI0B16412g	14.17113318	15.94765613	20.9766694	16.29115902	15.99950652	18.28242584	19.16256968	17.28047829	8.004475729	9.178619852	6.914923324	6.408182345	9.75164794	7.582863274	10.09754388	9.576137518
YALI1_B21423g	YALI0B16434g	69.90838007	70.04830988	81.82884738	77.53702656	74.64280983	79.87664422	84.69376724	82.48014012	68.85571694	74.45207548	75.10301258	73.58374036	69.11701255	69.45203005	74.98712427	68.51409573
YALI1_B21432g	YALI0B16456g	58.8452854	50.19488639	57.74477806	45.50213047	49.72786143	52.07564007	53.81234844	56.26043689	65.96169052	53.30823428	48.2429089	47.75316603	55.75809137	51.70507558	49.56663444	55.53877319
YALI1_B21466g	YALI0B16478g	34.72992073	37.60536357	40.07776401	37.65690604	42.58469586	45.46090581	44.78342608	40.07061355	44.43061849	46.5020504	39.97166483	36.60895591	50.3488065	35.79977952	39.20889021	44.65120478
YALI1_B21493g	YALI0B16500g	697.9599609	438.1461668	618.4912336	826.3188584	729.7247491	847.2197892	663.1788506	913.8021909	695.5016251	642.81823	610.9989495	689.3562325	901.680687	657.7045839	713.5756049	715.8929206
YALI1_B21538g	YALI0B16522g	459.6695808	345.4315186	518.0561367	686.6571613	650.4806419	667.3247517	550.4269672	651.7539106	235.8597658	316.7406322	332.7908058	315.507788	275.0243597	269.2463707	296.5893537	249.7526344
YALI1_B21562g	YALI0B16544g	21.28305267	54.51671131	46.42712343	23.6194767	27.5095609	26.65695939	30.65222987	21.52431171	30.29281112	29.92019088	41.00457628	40.95295339	34.92781888	30.10307455	34.74154083	32.04138744
YALI1_B21594g	YALI0B16566g	17.73983639	41.45111544	34.69488744	19.17363205	20.12277362	23.34528983	23.04690479	25.59698641	35.33790513	37.39072181	38.35968014	43.54832575	28.19474416	35.88216379	35.39938184	32.64708792
YALI1_B21618g	YALI0B16588g	14.08204515	18.96524484	20.24966901	19.83803997	22.12050968	22.79426101	20.96669903	17.95590202	11.91902326	17.72237253	16.4536907	16.87371131	16.3525548	14.68711649	16.96640751	16.41124788
YALI1_B21628g	YALI0B16610g	142.8081175	139.2730401	128.2375262	136.0715482	133.2025371	135.6087573	118.1258876	158.0426636	149.8590772	142.1911168	114.5807344	117.3814027	124.5219556	119.4541017	121.8775592	129.536481
YALI1_B21675g	YALI0B16632g	92.99207677	61.1721579	77.48227842	115.0518441	109.4375798	130.1980924	97.62469143	126.154406	104.5824471	106.8713525	144.1682905	136.4549412	194.8658699	112.4348883	124.8074184	137.0877422
YALI1_B21714g	YALI0B16654g	61.64141888	77.72522672	73.86585613	54.18053496	57.71811258	52.75615641	66.70562741	49.57106499	32.93553487	31.59621558	31.42601456	32.68264894	24.16318869	23.80533014	35.20777934	27.01616537
YALI1_B21737g	YALI0B16676g	29.1634392	28.39942431	30.09237198	42.50780924	36.08621941	39.73146105	24.62909028	51.73438296	32.70060814	30.27455035	30.45572911	25.81947872	38.98623065	31.98392834	36.18069497	39.47603444
YALI1_B21774g	YALI0B16698g	66.26946919	55.39175084	53.78956738	60.56154765	65.14566999	57.64933615	56.65621747	74.66034656	66.75240217	56.50079368	47.72074355	50.17659155	54.98831453	53.43865763	50.94154286	58.81982485
YALI1_B21787g	YALI0B16720g	110.6382282	87.74792026	96.97244127	97.92737363	96.22717026	101.8063837	109.7763698	100.8949965	78.56607852	70.55124512	59.49831239	69.15378715	66.298694	59.53236171	65.63128468	64.88539983
YALI1_B21798g	YALI0B16742g	96.86028958	126.3024583	115.9076666	111.6582102	126.2478156	102.5703069	129.6649098	87.44148548	72.30136878	86.75644871	105.7652791	97.40840409	65.11266285	94.30632717	104.7116197	84.86352893
YALI1_B21816g	YALI0B16764g	8.388158822	13.82414568	12.237624	9.532454095	8.645603323	7.868021464	7.733781972	9.71325946	18.67472089	15.79943336	11.87024947	15.30529868	11.72588791	15.56523637	11.36725913	14.66074574
YALI1_B21819g	YALI0B16786g	13.94890259	16.0166882	15.52455626	15.17603365	14.19489862	16.80119848	17.27425539	16.01801621	12.42641202	15.41392591	11.47125723	11.06448215	13.70342872	14.49059898	15.05934229	15.93709048
YALI1_B21855g	YALI0B16808g	92.74472758	94.82035113	102.4747617	91.73010999	92.41987215	96.60942487	88.65422934	105.1014421	83.60897326	85.19095637	80.16532951	83.88102198	86.42521522	76.58576797	83.36674584	84.59216695
YALI1_B21885g	YALI0B16822g	57.20070677	49.70044867	60.84016603	39.34640696	42.08249993	46.12389816	49.02692695	50.45964584	43.4151966	43.00887707	38.94011182	35.07991122	38.3782016	37.5059574	37.96755316	41.0682571
YALI1_B21935g	YALI0B16852g	8.916674773	9.021863056	6.990219923	6.603660484	4.383283738	6.492983223	3.222517526	9.510582461	2.905524809	5.066308696	1.782098015	2.093441707	1.354706828	2.853204814	2.35232314	2.358826523
YALI1_B21946g	NA	22.9445214	31.45619845	33.36926599	20.314849	23.08213949	23.70123266	24.97604536	24.95183808	58.91039774	48.87342362	43.4494255	42.07377107	39.34841674	43.85383937	40.28613861	42.41424877
YALI1_B21966g	YALI0B16874g	58.82410825	55.44288965	60.27597847	61.63315686	59.937739	61.24064329	68.50572441	59.81843961	63.78497016	67.81805158	69.04283334	75.20132328	72.72157924	65.91372966	67.57711993	67.54423764
YALI1_B22015g	YALI0B16896g	64.07722662	93.05338055	85.71907764	52.5534178	62.65451287	58.16652651	77.06992019	46.51855184	36.82956526	35.60586196	41.42367625	41.5275484	30.42970197	34.72847139	46.27767402	35.91482105
YALI1_B22020g	YALI0B16918g	30.85205592	36.89790245	34.87641339	29.93298532	31.17968835	34.35065408	34.40279393	34.90937447	41.12581692	39.45535827	41.06247207	46.06670099	40.03245838	37.07302064	42.50768373	40.29581494
YALI1_B22055g	YALI0B16940g	29.67090184	34.93575697	35.84052189	25.01433929	29.14803406	32.02671204	36.41196356	39.55082787	37.97616711	29.25244476	24.20070246	27.92601393	24.33617075	27.61069657	25.06327662	34.79008498
YALI1_B22060g	YALI0B16962g	60.95254374	72.51670148	67.48148351	64.69009317	57.27807754	55.51118233	68.77385271	68.17570589	66.97719757	64.99380392	56.25641717	62.64451772	47.45430676	66.54509834	64.60749816	63.31576283
YALI1_B22088g	YALI0B16984g	184.3572082	178.404814	160.0170797	189.9443719	191.3320782	192.7812367	150.3235994	219.0501932	156.9285426	160.0702603	163.4863539	150.2135356	157.2961633	172.2002472	170.1157938	173.0312681
YALI1_B22109g	YALI0B17006g	20.69222154	36.986384	32.21689754	22.79989177	24.03068373	25.46918846	23.88323321	21.12537052	23.06465364	27.40895407	29.87993422	29.70967697	30.95461765	24.46340735	27.587821	27.42607895
YALI1_B22158g	YALI0B17028g	0.721893274	0.47256203	0.410880533	0.693140755	0.554459123	0.833518225	0.747361415	0.600804829	0.997026873	1.02043412	0.714964071	0.791042963	0.939230405	0.678627478	0.579376201	0.695840537
YALI1_B22259g	YALI0B17050g	44.9806664	43.05625837	49.79245008	45.67835871	42.24265011	51.8777372	55.17761643	51.09962006	14.06496836	15.18971512	12.99285436	17.46668133	16.60331953	14.1916416	16.09480931	17.77613265
YALI1_B22266g	YALI0B17061g	190.4434079	165.0545132	169.2749282	129.2522984	138.4739681	143.5082288	148.3755757	188.6402941	225.1294151	172.6158557	123.4811048	152.4910609	131.6277297	163.8660402	151.2300343	153.7114117
YALI1_B22276g	YALI0B17072g	68.53465915	50.07018745	59.53496727	57.51867011	58.5539568	63.38925457	60.30400426	70.34024702	56.65523408	55.07658892	41.05187837	43.81966013	50.87397911	42.97977261	45.70558344	46.78266242
YALI1_B22302r	YALI0B17094r	0	0	0	0	0	0	0.323803527	0	0	0	0	0	0	0	0.737178138	0
YALI1_B22321g	YALI0B17138g	3.061561215	1.758759235	1.684633676	2.840206695	3.198060163	3.536098678	3.114179029	4.097427105	4.049774073	2.81800846	2.955354997	3.596554398	2.756131901	2.96554995	3.000976755	2.971493626
YALI1_B22351g	YALI0B17160g	14.82983143	12.94032971	13.79064478	11.00433187	12.49375504	13.71705343	7.126032522	17.75730351	7.504381348	8.311899737	5.769533323	8.726702069	7.750089789	6.462936949	5.937932672	7.510346675
YALI1_B22372g	YALI0B17182g	9.514948392	10.82804374	10.61629853	10.03142855	10.03183551	11.70341905	8.526578647	14.60337334	13.79867975	14.28607767	12.56606177	12.58645815	18.01740457	12.78413574	12.50647885	13.12644457
YALI1_B22375g	YALI0B17204g	11.73132475	11.29186731	8.658509853	10.42884902	9.691533919	7.410588224	8.377985008	14.6415736	7.506704506	7.501821609	4.867632102	5.647393573	4.330927079	7.533007514	6.391121272	7.051065883
YALI1_B22391g	NA	11.14531982	12.68333977	13.55490727	7.728409175	10.4233072	14.32551876	14.26370889	13.3639161	16.60574027	13.70886241	14.14837816	14.97471629	10.25680877	12.57570927	10.23527581	9.114971626
YALI1_B22410g	YALI0B17226g	21.99699537	19.02866321	22.68353839	26.96595268	26.92770734	27.8439899	24.83277932	28.23063394	26.68497402	31.52224404	33.60763503	28.40866442	35.37438498	27.12746912	25.77241802	29.50704233
YALI1_B22414g	YALI0B17248g	14.64149254	12.90068449	13.29631764	14.79885601	15.48681613	15.55867333	15.85158295	17.18339539	10.6055891	9.288033006	10.82346001	9.217399423	14.55810945	8.952463321	11.6467937	13.07688135
YALI1_B22452g	YALI0B17270g	0.037823484	0.07668798	0	0.059892953	0.123002314	0.102243988	0.100764035	0.080311996	0.305752174	0.099902641	0.173363381	0.171830574	0.370649683	0.176893981	0.382335981	0.092799485
YALI1_B22499g	YALI0B17292g	15.94243291	20.11835369	18.6545352	18.44446846	19.31578612	20.60991385	22.34905158	18.44904689	13.61390524	13.55719616	15.08779484	14.97230424	15.85939298	12.40903763	16.22687407	13.13315625
YALI1_B22512g	YALI0B17303g	14.92817249	24.45502988	21.58766318	18.15714759	17.35480649	19.88441078	21.13357684	22.05046156	27.98243893	35.71519418	26.77424058	27.68419649	31.4669876	27.27551361	26.60803536	29.29122941
YALI1_B22533g	YALI0B17314g	69.69427681	73.04696274	82.27914467	70.46205023	71.73687895	77.85737239	80.03160045	69.0499167	52.90023768	49.8906985	45.97457317	49.92963792	42.077587	41.5002946	46.15414759	44.16221183
YALI1_B22549g	YALI0B17336g	33.49340956	35.98932633	37.56003439	39.47803167	48.39584515	46.17387686	44.92783206	42.22865454	35.45884658	39.17625424	44.25740734	40.95295339	42.87013738	40.93897065	42.43657854	39.74879379
YALI1_B22561g	YALI0B17358g	190.6962855	180.4502781	194.4834521	185.1718187	168.0758286	199.6157659	203.7308828	212.114466	175.4975011	169.151128	124.6434554	148.966368	138.4739629	151.7139343	147.7211704	157.3337933
YALI1_B22598g	YALI0B17380g	166.2798592	129.8948935	151.4339983	184.349132	182.45626	180.4923697	172.6562777	184.3143686	149.2829716	155.2521491	149.7650381	152.6230756	149.2635198	167.464232	153.7834419	159.8199129
YALI1_B22614g	YALI0B17402g	164.7935505	178.4137118	185.3833982	184.2502326	199.8798637	188.4974819	196.5386847	167.6040517	116.2676131	126.504253	135.6060571	153.4167161	134.1330999	127.7520717	138.401931	120.2496878
YALI1_B22638g	YALI0B17424g	81.56682308	78.80924732	75.9803995	73.84022816	69.95982459	70.75024025	71.80206	82.22206004	106.4903727	84.68738417	75.68597119	84.92531945	77.54216201	84.46237845	81.85662142	83.83411092
YALI1_B22645g	YALI0B17446g	45.18291867	35.60730453	46.9013447	35.99956014	54.19801959	53.40191023	43.05204817	50.98048785	40.62998945	43.72933532	23.88397703	29.76580515	27.48802757	38.03764585	27.60372529	33.33764909
YALI1_B22667g	YALI0B17468g	32.67746754	29.41378855	31.25214285	32.06530329	31.55630454	32.658147	32.37565057	37.9970206	37.99100928	31.62739572	27.22096883	33.47599834	36.63525415	31.66607856	32.43632467	32.45078541
YALI1_B22677g	YALI0B17490g	209.5407383	217.2369093	220.0181499	271.194716	257.3863241	262.5449075	294.5431802	250.8438298	246.8594657	247.7966422	256.0246626	222.7369264	246.1293535	238.8269038	228.975426	249.8883165
YALI1_B22697g	YALI0B17512g	97.88898561	106.252355	120.4131802	116.2381911	114.7515542	115.1257003	125.0979989	110.287022	101.3658564	109.0347994	114.4318403	113.3891344	101.1292329	104.6739667	108.6686817	98.46843478
YALI1_B22721g	YALI0B17534g	35.3372199	22.73696351	34.74771011	33.15487536	30.72269797	36.89337981	27.66577332	41.78868721	29.43985762	28.76263638	24.04723459	30.60550717	32.09930295	30.61896366	27.3613222	28.43871147
YALI1_B22747g	YALI0B17556g	17.97957219	20.36493863	20.37020867	17.25161254	18.68306095	20.83588645	20.68117611	20.60206541	12.51508163	13.71812963	13.26733521	10.74545383	14.69032702	11.44888137	15.69440483	15.38428158
YALI1_B22769r	YALI0B17567r	0	0	0	0.575777631	0	0.368593873	0.484344771	0	0	1.440612875	0	0	0.56261376	0	0.367556607	0
[truncated: 6,612 more rows]
